# Supplementary material for: A Genome-Wide Profiling of Glioma Patients with an IDH1 Mutation Using the Catalogue of Somatic Mutations in Cancer Database
Source: Cancers (Basel). 2021 Aug 26;13(17):4299. doi: 10.3390/cancers13174299 (PMC8428353; doi:10.3390/cancers13174299)
Supplement: Supplementary file 1 [file cancers-13-04299-s001.zip › Supplemental Tables_final.xlsx]

## Sheet: Table S1
Table S1. Coding mutation frequency IDH1-mutant or -wildtype astrocytoma patients
Gene Name	IDH1-mutant Patient count	IDH1-mutant Patient ratio (out of 115)	IDH1-WT Patient count	IDH1-WT Patient ratio (out of 1059)
IDH1	115	1	0	0
TP53	72	0.626087	272	0.256846
ATRX	31	0.269565	37	0.0349386
TTN	17	0.147826	192	0.181303
FLG	10	0.0869565	115	0.108593
MUC16	10	0.0869565	130	0.122757
MUC4	10	0.0869565	52	0.0491029
AMBRA1	9	0.0782609	3	0.00283286
SYNE1	9	0.0782609	51	0.0481586
APOB	8	0.0695652	37	0.0349386
DLG5	8	0.0695652	9	0.00849858
FAT2	8	0.0695652	35	0.03305
FRAS1	8	0.0695652	39	0.0368272
HSPG2	8	0.0695652	26	0.0245515
PKHD1	8	0.0695652	52	0.0491029
CALR3	7	0.0608696	3	0.00283286
EGFR	7	0.0608696	178	0.168083
FAT4	7	0.0608696	23	0.0217186
FRY	7	0.0608696	9	0.00849858
NOTCH1	7	0.0608696	6	0.00566572
PAX3	7	0.0608696	11	0.0103872
PIK3CA	7	0.0608696	69	0.0651558
PREX1	7	0.0608696	14	0.01322
SCN5A	7	0.0608696	25	0.0236072
SPTBN1	7	0.0608696	7	0.00661001
TCHH	7	0.0608696	37	0.0349386
ACAN	6	0.0521739	21	0.01983
AHNAK	6	0.0521739	50	0.0472144
ANK1	6	0.0521739	22	0.0207743
ARID2	6	0.0521739	7	0.00661001
CFAP57	6	0.0521739	7	0.00661001
CHD6	6	0.0521739	11	0.0103872
CSMD1	6	0.0521739	23	0.0217186
DNAH9	6	0.0521739	30	0.0283286
ESPL1	6	0.0521739	19	0.0179415
FAM193A	6	0.0521739	4	0.00377715
FREM2	6	0.0521739	10	0.00944287
GLRA4	6	0.0521739	1	0.000944287
HERC2	6	0.0521739	23	0.0217186
HUWE1	6	0.0521739	19	0.0179415
ITPRID1	6	0.0521739	8	0.0075543
KRT1	6	0.0521739	3	0.00283286
LAMA1	6	0.0521739	50	0.0472144
NEB	6	0.0521739	26	0.0245515
PATJ	6	0.0521739	9	0.00849858
PPP1R3A	6	0.0521739	20	0.0188857
SACS	6	0.0521739	21	0.01983
SDK1	6	0.0521739	35	0.03305
TLL2	6	0.0521739	10	0.00944287
UBXN11	6	0.0521739	7	0.00661001
USH2A	6	0.0521739	62	0.0585458
VPS13B	6	0.0521739	17	0.0160529
ZFHX3	6	0.0521739	21	0.01983
AADACL4	5	0.0434783	8	0.0075543
ABCA10	5	0.0434783	12	0.0113314
ABCA7	5	0.0434783	21	0.01983
ANK3	5	0.0434783	12	0.0113314
ANKRD26	5	0.0434783	3	0.00283286
APC	5	0.0434783	15	0.0141643
ARMC4	5	0.0434783	9	0.00849858
ATP11A	5	0.0434783	12	0.0113314
ATP1A2	5	0.0434783	9	0.00849858
ATP2B1	5	0.0434783	5	0.00472144
BAZ2B	5	0.0434783	10	0.00944287
C3	5	0.0434783	24	0.0226629
CA6	5	0.0434783	1	0.000944287
CACNA1S	5	0.0434783	22	0.0207743
CD163	5	0.0434783	20	0.0188857
CEMIP2	5	0.0434783	12	0.0113314
CENPF	5	0.0434783	14	0.01322
CGN	5	0.0434783	7	0.00661001
COL6A5	5	0.0434783	14	0.01322
CR1L	5	0.0434783	4	0.00377715
CXorf22	5	0.0434783	27	0.0254958
DAGLA	5	0.0434783	8	0.0075543
DCLRE1B	5	0.0434783	3	0.00283286
DNAH7	5	0.0434783	20	0.0188857
DNAH8	5	0.0434783	35	0.03305
DYNC2H1	5	0.0434783	11	0.0103872
ERN2	5	0.0434783	10	0.00944287
EVPL	5	0.0434783	16	0.0151086
F5	5	0.0434783	20	0.0188857
FOXP2	5	0.0434783	10	0.00944287
GPHN	5	0.0434783	5	0.00472144
HMCN1	5	0.0434783	59	0.0557129
IRAK3	5	0.0434783	7	0.00661001
IRS4	5	0.0434783	43	0.0406043
KIAA0100	5	0.0434783	9	0.00849858
KIAA2026	5	0.0434783	8	0.0075543
LRBA	5	0.0434783	12	0.0113314
LRRK2	5	0.0434783	7	0.00661001
MLH3	5	0.0434783	4	0.00377715
MTUS2	5	0.0434783	17	0.0160529
MYH1	5	0.0434783	17	0.0160529
NR2C1	5	0.0434783	3	0.00283286
OBSCN	5	0.0434783	56	0.0528801
PARP4	5	0.0434783	16	0.0151086
PCBP4	5	0.0434783	0	0
PCDHB15	5	0.0434783	7	0.00661001
PDE3A	5	0.0434783	9	0.00849858
PDE6A	5	0.0434783	5	0.00472144
PEG3	5	0.0434783	12	0.0113314
PIK3R1	5	0.0434783	32	0.0302172
PKHD1L1	5	0.0434783	28	0.02644
PLEC	5	0.0434783	18	0.0169972
PLEKHG6	5	0.0434783	10	0.00944287
POLQ	5	0.0434783	9	0.00849858
PPP1R1C	5	0.0434783	0	0
PRPF8	5	0.0434783	15	0.0141643
RHPN2	5	0.0434783	15	0.0141643
RIF1	5	0.0434783	3	0.00283286
RP1	5	0.0434783	18	0.0169972
RYR1	5	0.0434783	34	0.0321058
RYR2	5	0.0434783	75	0.0708215
SCUBE1	5	0.0434783	7	0.00661001
SETD2	5	0.0434783	24	0.0226629
SLC12A5	5	0.0434783	21	0.01983
SMARCA4	5	0.0434783	12	0.0113314
SPATA5	5	0.0434783	6	0.00566572
SPTBN5	5	0.0434783	14	0.01322
TESK1	5	0.0434783	7	0.00661001
THADA	5	0.0434783	9	0.00849858
THEMIS	5	0.0434783	9	0.00849858
TIE1	5	0.0434783	13	0.0122757
TRPM3	5	0.0434783	15	0.0141643
TRPM7	5	0.0434783	5	0.00472144
WDFY4	5	0.0434783	4	0.00377715
WNK1	5	0.0434783	8	0.0075543
XIRP2	5	0.0434783	22	0.0207743
ZBTB20	5	0.0434783	7	0.00661001
ZMIZ1	5	0.0434783	9	0.00849858
ZNF142	5	0.0434783	9	0.00849858
ZNF429	5	0.0434783	106	0.100094
ZNF687	5	0.0434783	1	0.000944287
ABCB11	4	0.0347826	10	0.00944287
ABCB4	4	0.0347826	15	0.0141643
ABCC5	4	0.0347826	12	0.0113314
ADAM29	4	0.0347826	24	0.0226629
ADAMTS3	4	0.0347826	4	0.00377715
ADCY3	4	0.0347826	8	0.0075543
AGBL5	4	0.0347826	4	0.00377715
AKAP11	4	0.0347826	4	0.00377715
ALPI	4	0.0347826	6	0.00566572
ANGPT1	4	0.0347826	2	0.00188857
ANK2	4	0.0347826	58	0.0547686
ANKRD35	4	0.0347826	3	0.00283286
ANKRD62	4	0.0347826	2	0.00188857
AOX1	4	0.0347826	19	0.0179415
AP3B1	4	0.0347826	8	0.0075543
ARHGAP33	4	0.0347826	3	0.00283286
ARID1B	4	0.0347826	13	0.0122757
ARSK	4	0.0347826	3	0.00283286
ATG2A	4	0.0347826	8	0.0075543
ATN1	4	0.0347826	6	0.00566572
ATP2B2	4	0.0347826	13	0.0122757
ATR	4	0.0347826	18	0.0169972
BAG1	4	0.0347826	3	0.00283286
BIN2	4	0.0347826	4	0.00377715
BPI	4	0.0347826	5	0.00472144
BRCA2	4	0.0347826	14	0.01322
BRPF3	4	0.0347826	8	0.0075543
BSN	4	0.0347826	15	0.0141643
BUD13	4	0.0347826	3	0.00283286
C3orf30	4	0.0347826	2	0.00188857
CACNA1C	4	0.0347826	18	0.0169972
CACNA1D	4	0.0347826	16	0.0151086
CACNA1F	4	0.0347826	12	0.0113314
CACNA1I	4	0.0347826	13	0.0122757
CACNA2D3	4	0.0347826	8	0.0075543
CAD	4	0.0347826	18	0.0169972
CARMIL1	4	0.0347826	8	0.0075543
CCDC120	4	0.0347826	3	0.00283286
CCDC146	4	0.0347826	8	0.0075543
CCSER1	4	0.0347826	11	0.0103872
CD2AP	4	0.0347826	1	0.000944287
CDC42BPB	4	0.0347826	11	0.0103872
CDH24	4	0.0347826	3	0.00283286
CDKL5	4	0.0347826	14	0.01322
CDKN2AIP	4	0.0347826	4	0.00377715
CHI3L2	4	0.0347826	1	0.000944287
CHODL	4	0.0347826	1	0.000944287
CHRND	4	0.0347826	6	0.00566572
CLDN3	4	0.0347826	0	0
CLSTN1	4	0.0347826	6	0.00566572
COL12A1	4	0.0347826	20	0.0188857
COL3A1	4	0.0347826	19	0.0179415
COL4A3	4	0.0347826	9	0.00849858
COL4A5	4	0.0347826	10	0.00944287
CPEB2	4	0.0347826	2	0.00188857
CRTAC1	4	0.0347826	8	0.0075543
CTTNBP2	4	0.0347826	9	0.00849858
CUBN	4	0.0347826	11	0.0103872
DCAF8L2	4	0.0347826	4	0.00377715
DDB2	4	0.0347826	1	0.000944287
DDX11	4	0.0347826	8	0.0075543
DLC1	4	0.0347826	12	0.0113314
DLEC1	4	0.0347826	12	0.0113314
DNAAF5	4	0.0347826	3	0.00283286
DNAH11	4	0.0347826	34	0.0321058
DNAH2	4	0.0347826	45	0.0424929
DNAH3	4	0.0347826	39	0.0368272
DNAH5	4	0.0347826	55	0.0519358
DNAI2	4	0.0347826	4	0.00377715
DNHD1	4	0.0347826	11	0.0103872
DNMT3A	4	0.0347826	8	0.0075543
DNMT3B	4	0.0347826	8	0.0075543
DOCK10	4	0.0347826	9	0.00849858
DOCK7	4	0.0347826	8	0.0075543
DOCK9	4	0.0347826	5	0.00472144
DOP1B	4	0.0347826	7	0.00661001
DSG4	4	0.0347826	17	0.0160529
DSP	4	0.0347826	34	0.0321058
DST	4	0.0347826	18	0.0169972
DZIP1L	4	0.0347826	5	0.00472144
EGFLAM	4	0.0347826	10	0.00944287
EIF1AX	4	0.0347826	3	0.00283286
ELANE	4	0.0347826	2	0.00188857
EPHA10	4	0.0347826	16	0.0151086
EPHA7	4	0.0347826	7	0.00661001
EPHA8	4	0.0347826	20	0.0188857
ERBB4	4	0.0347826	4	0.00377715
ERI2	4	0.0347826	2	0.00188857
ESYT1	4	0.0347826	1	0.000944287
EXO1	4	0.0347826	1	0.000944287
EXPH5	4	0.0347826	7	0.00661001
EYS	4	0.0347826	10	0.00944287
F8	4	0.0347826	13	0.0122757
FAM120B	4	0.0347826	7	0.00661001
FAM124B	4	0.0347826	2	0.00188857
FAM234A	4	0.0347826	1	0.000944287
FAM234B	4	0.0347826	3	0.00283286
FAM83H	4	0.0347826	20	0.0188857
FARP1	4	0.0347826	5	0.00472144
FAT3	4	0.0347826	16	0.0151086
FBF1	4	0.0347826	4	0.00377715
FBN1	4	0.0347826	15	0.0141643
FCGBP	4	0.0347826	42	0.0396601
FCRL1	4	0.0347826	7	0.00661001
FGD5	4	0.0347826	28	0.02644
FLG2	4	0.0347826	39	0.0368272
FLT4	4	0.0347826	26	0.0245515
FSIP2	4	0.0347826	19	0.0179415
GALNT1	4	0.0347826	3	0.00283286
GAS8-AS1	4	0.0347826	0	0
GCM2	4	0.0347826	2	0.00188857
GCSAM	4	0.0347826	2	0.00188857
GNPTAB	4	0.0347826	6	0.00566572
GRIN3B	4	0.0347826	2	0.00188857
GRK2	4	0.0347826	5	0.00472144
GRK6	4	0.0347826	5	0.00472144
GTF3C1	4	0.0347826	11	0.0103872
GUCY2F	4	0.0347826	4	0.00377715
GXYLT1	4	0.0347826	11	0.0103872
HBD	4	0.0347826	0	0
HELZ2	4	0.0347826	20	0.0188857
HIP1R	4	0.0347826	3	0.00283286
HIST1H3F	4	0.0347826	3	0.00283286
HIVEP2	4	0.0347826	11	0.0103872
HIVEP3	4	0.0347826	8	0.0075543
HMGCLL1	4	0.0347826	4	0.00377715
HMOX1	4	0.0347826	2	0.00188857
HOMER3	4	0.0347826	1	0.000944287
HYDIN	4	0.0347826	45	0.0424929
IL16	4	0.0347826	11	0.0103872
IL31RA	4	0.0347826	8	0.0075543
INTS5	4	0.0347826	3	0.00283286
ITGA10	4	0.0347826	8	0.0075543
JAG2	4	0.0347826	12	0.0113314
JMJD1C	4	0.0347826	8	0.0075543
JMJD7-PLA2G4B	4	0.0347826	1	0.000944287
JPH1	4	0.0347826	12	0.0113314
KCNK16	4	0.0347826	3	0.00283286
KCNU1	4	0.0347826	11	0.0103872
KDM3A	4	0.0347826	3	0.00283286
KIAA0754	4	0.0347826	8	0.0075543
KIAA1109	4	0.0347826	15	0.0141643
KIAA1211	4	0.0347826	7	0.00661001
KIAA1211L	4	0.0347826	7	0.00661001
KIAA1522	4	0.0347826	5	0.00472144
KIDINS220	4	0.0347826	9	0.00849858
KIF17	4	0.0347826	15	0.0141643
KIF26B	4	0.0347826	8	0.0075543
KIF5C	4	0.0347826	8	0.0075543
KLHDC7A	4	0.0347826	6	0.00566572
KLHDC8A	4	0.0347826	4	0.00377715
KLHL40	4	0.0347826	6	0.00566572
KMT2B	4	0.0347826	21	0.01983
KRT28	4	0.0347826	5	0.00472144
LAMA2	4	0.0347826	18	0.0169972
LAMC2	4	0.0347826	8	0.0075543
LAMC3	4	0.0347826	14	0.01322
LAS1L	4	0.0347826	5	0.00472144
LGSN	4	0.0347826	13	0.0122757
LILRB1	4	0.0347826	21	0.01983
LMBRD1	4	0.0347826	2	0.00188857
LMF2	4	0.0347826	1	0.000944287
LMNTD1	4	0.0347826	3	0.00283286
LPIN2	4	0.0347826	2	0.00188857
LRCH1	4	0.0347826	1	0.000944287
LRP2	4	0.0347826	59	0.0557129
LRP6	4	0.0347826	3	0.00283286
LRRC31	4	0.0347826	6	0.00566572
LRRK1	4	0.0347826	25	0.0236072
MACF1	4	0.0347826	22	0.0207743
MAGI2	4	0.0347826	10	0.00944287
MCC	4	0.0347826	6	0.00566572
MICAL3	4	0.0347826	9	0.00849858
MPP7	4	0.0347826	6	0.00566572
MS4A8	4	0.0347826	4	0.00377715
MUC12	4	0.0347826	27	0.0254958
MUC17	4	0.0347826	69	0.0651558
MUC2	4	0.0347826	21	0.01983
MXRA5	4	0.0347826	37	0.0349386
MYH7B	4	0.0347826	8	0.0075543
MYH9	4	0.0347826	10	0.00944287
MYO1B	4	0.0347826	14	0.01322
MYO1E	4	0.0347826	4	0.00377715
MYO1F	4	0.0347826	8	0.0075543
MYOF	4	0.0347826	12	0.0113314
NAALADL1	4	0.0347826	6	0.00566572
NBPF10	4	0.0347826	33	0.0311615
NCKAP1	4	0.0347826	1	0.000944287
NDRG1	4	0.0347826	3	0.00283286
NECTIN2	4	0.0347826	1	0.000944287
NEDD4	4	0.0347826	5	0.00472144
NEXMIF	4	0.0347826	12	0.0113314
NLRP1	4	0.0347826	6	0.00566572
NLRP3	4	0.0347826	19	0.0179415
NLRP4	4	0.0347826	26	0.0245515
NPC1L1	4	0.0347826	10	0.00944287
NRK	4	0.0347826	13	0.0122757
NSD2	4	0.0347826	6	0.00566572
NUP205	4	0.0347826	11	0.0103872
NUP210	4	0.0347826	8	0.0075543
NXN	4	0.0347826	3	0.00283286
ODF2L	4	0.0347826	3	0.00283286
OGDHL	4	0.0347826	5	0.00472144
OGT	4	0.0347826	2	0.00188857
OR2A14	4	0.0347826	10	0.00944287
OR4A16	4	0.0347826	4	0.00377715
OR4C16	4	0.0347826	8	0.0075543
OR4K2	4	0.0347826	10	0.00944287
OR4S1	4	0.0347826	1	0.000944287
OR6N1	4	0.0347826	2	0.00188857
OTOF	4	0.0347826	18	0.0169972
P2RY11	4	0.0347826	1	0.000944287
P3H2	4	0.0347826	1	0.000944287
PAPPA	4	0.0347826	10	0.00944287
PCDH7	4	0.0347826	13	0.0122757
PCNX1	4	0.0347826	12	0.0113314
PDE11A	4	0.0347826	8	0.0075543
PDE6B	4	0.0347826	5	0.00472144
PEAR1	4	0.0347826	7	0.00661001
PER1	4	0.0347826	5	0.00472144
PER2	4	0.0347826	9	0.00849858
PFKM	4	0.0347826	3	0.00283286
PHF3	4	0.0347826	9	0.00849858
PIK3R4	4	0.0347826	3	0.00283286
PKD1L1	4	0.0347826	15	0.0141643
PLA2G4B	4	0.0347826	1	0.000944287
PLEKHG1	4	0.0347826	8	0.0075543
PLXNA1	4	0.0347826	13	0.0122757
PNMA3	4	0.0347826	7	0.00661001
POLR3D	4	0.0347826	3	0.00283286
PPAN	4	0.0347826	7	0.00661001
PPAN-P2RY11	4	0.0347826	7	0.00661001
PPL	4	0.0347826	10	0.00944287
PRDM16	4	0.0347826	5	0.00472144
PTCHD3	4	0.0347826	9	0.00849858
PTK7	4	0.0347826	10	0.00944287
PTPN14	4	0.0347826	6	0.00566572
PTPRQ	4	0.0347826	3	0.00283286
PTPRT	4	0.0347826	25	0.0236072
PWP2	4	0.0347826	4	0.00377715
RADIL	4	0.0347826	19	0.0179415
RAI1	4	0.0347826	7	0.00661001
RANBP2	4	0.0347826	6	0.00566572
RASAL3	4	0.0347826	7	0.00661001
RBM47	4	0.0347826	21	0.01983
RECQL5	4	0.0347826	7	0.00661001
RFX2	4	0.0347826	6	0.00566572
RIPOR1	4	0.0347826	10	0.00944287
ROS1	4	0.0347826	15	0.0141643
RYR3	4	0.0347826	45	0.0424929
SALL1	4	0.0347826	5	0.00472144
SALL2	4	0.0347826	4	0.00377715
SCAF1	4	0.0347826	8	0.0075543
SCARA3	4	0.0347826	2	0.00188857
SEMA3C	4	0.0347826	18	0.0169972
SERTAD2	4	0.0347826	1	0.000944287
SGK223	4	0.0347826	12	0.0113314
SGMS2	4	0.0347826	2	0.00188857
SGSH	4	0.0347826	0	0
SHCBP1L	4	0.0347826	6	0.00566572
SHROOM2	4	0.0347826	9	0.00849858
SLC12A7	4	0.0347826	11	0.0103872
SLC35G3	4	0.0347826	8	0.0075543
SLC45A1	4	0.0347826	8	0.0075543
SLC45A3	4	0.0347826	3	0.00283286
SLC4A4	4	0.0347826	5	0.00472144
SLIT2	4	0.0347826	23	0.0217186
SMC1A	4	0.0347826	11	0.0103872
SMCHD1	4	0.0347826	9	0.00849858
SNAPC4	4	0.0347826	3	0.00283286
SPACA1	4	0.0347826	4	0.00377715
SPATA13	4	0.0347826	6	0.00566572
SPATA20	4	0.0347826	2	0.00188857
SPEN	4	0.0347826	15	0.0141643
SPTBN2	4	0.0347826	10	0.00944287
STARD8	4	0.0347826	2	0.00188857
STK24	4	0.0347826	2	0.00188857
SULF1	4	0.0347826	9	0.00849858
SYNE2	4	0.0347826	19	0.0179415
SYTL4	4	0.0347826	4	0.00377715
SZT2	4	0.0347826	14	0.01322
TAF2	4	0.0347826	6	0.00566572
TAGAP	4	0.0347826	4	0.00377715
TAPBPL	4	0.0347826	4	0.00377715
TCF20	4	0.0347826	6	0.00566572
TECTA	4	0.0347826	17	0.0160529
TEKT4	4	0.0347826	10	0.00944287
TEX15	4	0.0347826	27	0.0254958
TG	4	0.0347826	21	0.01983
THSD7B	4	0.0347826	23	0.0217186
TLE4	4	0.0347826	7	0.00661001
TMEM132E	4	0.0347826	7	0.00661001
TMEM133	4	0.0347826	1	0.000944287
TMEM214	4	0.0347826	3	0.00283286
TRIM32	4	0.0347826	2	0.00188857
TRIP10	4	0.0347826	2	0.00188857
TRIP11	4	0.0347826	10	0.00944287
TRPM2	4	0.0347826	18	0.0169972
TRPM5	4	0.0347826	5	0.00472144
TRPM6	4	0.0347826	16	0.0151086
TRPV3	4	0.0347826	6	0.00566572
TRRAP	4	0.0347826	24	0.0226629
TSC2	4	0.0347826	6	0.00566572
TTC31	4	0.0347826	5	0.00472144
TUBAL3	4	0.0347826	5	0.00472144
TUBGCP6	4	0.0347826	10	0.00944287
TXNDC11	4	0.0347826	2	0.00188857
TXNRD1	4	0.0347826	4	0.00377715
TYMP	4	0.0347826	1	0.000944287
UBR4	4	0.0347826	25	0.0236072
USP49	4	0.0347826	4	0.00377715
UTP20	4	0.0347826	6	0.00566572
VPS13C	4	0.0347826	5	0.00472144
VWA2	4	0.0347826	1	0.000944287
VWF	4	0.0347826	32	0.0302172
WDHD1	4	0.0347826	4	0.00377715
XKR9	4	0.0347826	4	0.00377715
YLPM1	4	0.0347826	5	0.00472144
ZAN	4	0.0347826	20	0.0188857
ZBTB38	4	0.0347826	9	0.00849858
ZFP57	4	0.0347826	5	0.00472144
ZMYM3	4	0.0347826	10	0.00944287
ZNF181	4	0.0347826	3	0.00283286
ZNF233	4	0.0347826	1	0.000944287
ZNF407	4	0.0347826	13	0.0122757
ZNF469	4	0.0347826	13	0.0122757
ZNF510	4	0.0347826	1	0.000944287
ZNF518B	4	0.0347826	7	0.00661001
ZNF586	4	0.0347826	2	0.00188857
ZNF644	4	0.0347826	9	0.00849858
ZNF646	4	0.0347826	9	0.00849858
ZNF648	4	0.0347826	2	0.00188857
ZNF665	4	0.0347826	7	0.00661001
ZNF787	4	0.0347826	2	0.00188857
ZNF790	4	0.0347826	2	0.00188857
ABCA1	3	0.026087	10	0.00944287
ABCA13	3	0.026087	36	0.0339943
ABCA4	3	0.026087	11	0.0103872
ABCA5	3	0.026087	8	0.0075543
ABCB1	3	0.026087	22	0.0207743
ABCB7	3	0.026087	4	0.00377715
ABCC1	3	0.026087	18	0.0169972
ABCC10	3	0.026087	12	0.0113314
ABCC11	3	0.026087	9	0.00849858
ABCF2	3	0.026087	2	0.00188857
ABR	3	0.026087	5	0.00472144
ABTB1	3	0.026087	4	0.00377715
ACACA	3	0.026087	13	0.0122757
ACAD9	3	0.026087	3	0.00283286
ACADVL	3	0.026087	3	0.00283286
ACKR2	3	0.026087	5	0.00472144
ACOT2	3	0.026087	2	0.00188857
ACPP	3	0.026087	1	0.000944287
ACSM1	3	0.026087	4	0.00377715
ACTBL2	3	0.026087	10	0.00944287
ADAM12	3	0.026087	3	0.00283286
ADAMTS13	3	0.026087	7	0.00661001
ADAMTS2	3	0.026087	16	0.0151086
ADAMTS9	3	0.026087	9	0.00849858
ADAMTSL2	3	0.026087	1	0.000944287
ADAMTSL3	3	0.026087	6	0.00566572
ADARB2	3	0.026087	10	0.00944287
ADCK2	3	0.026087	3	0.00283286
ADCY4	3	0.026087	8	0.0075543
ADCY7	3	0.026087	9	0.00849858
ADCY8	3	0.026087	14	0.01322
ADGRE5	3	0.026087	2	0.00188857
ADGRF1	3	0.026087	3	0.00283286
ADGRF4	3	0.026087	8	0.0075543
ADGRG4	3	0.026087	26	0.0245515
ADGRG6	3	0.026087	7	0.00661001
ADGRL3	3	0.026087	9	0.00849858
ADGRV1	3	0.026087	45	0.0424929
ADRA1D	3	0.026087	2	0.00188857
ADRA2B	3	0.026087	5	0.00472144
AGAP3	3	0.026087	7	0.00661001
AGO2	3	0.026087	4	0.00377715
AGRN	3	0.026087	16	0.0151086
AKAP1	3	0.026087	3	0.00283286
AKAP2	3	0.026087	17	0.0160529
AKNAD1	3	0.026087	4	0.00377715
ALDH1A2	3	0.026087	4	0.00377715
ALDH9A1	3	0.026087	2	0.00188857
ALG10	3	0.026087	2	0.00188857
ALK	3	0.026087	8	0.0075543
ALOX15	3	0.026087	2	0.00188857
ALOX5	3	0.026087	3	0.00283286
AMER1	3	0.026087	7	0.00661001
AMOT	3	0.026087	5	0.00472144
AMZ1	3	0.026087	1	0.000944287
ANAPC5	3	0.026087	3	0.00283286
ANKFY1	3	0.026087	5	0.00472144
ANKLE2	3	0.026087	4	0.00377715
ANKRD12	3	0.026087	9	0.00849858
ANKRD13B	3	0.026087	3	0.00283286
ANKRD16	3	0.026087	0	0
ANKRD27	3	0.026087	1	0.000944287
ANKRD28	3	0.026087	6	0.00566572
ANKRD52	3	0.026087	4	0.00377715
ANO7	3	0.026087	9	0.00849858
ANPEP	3	0.026087	12	0.0113314
ANXA1	3	0.026087	2	0.00188857
AP2B1	3	0.026087	4	0.00377715
AP3D1	3	0.026087	8	0.0075543
APBB1IP	3	0.026087	2	0.00188857
APC2	3	0.026087	4	0.00377715
AQP7	3	0.026087	13	0.0122757
AREL1	3	0.026087	3	0.00283286
ARFGEF1	3	0.026087	9	0.00849858
ARFIP2	3	0.026087	2	0.00188857
ARHGAP11A	3	0.026087	4	0.00377715
ARHGAP30	3	0.026087	9	0.00849858
ARHGAP32	3	0.026087	11	0.0103872
ARHGAP39	3	0.026087	7	0.00661001
ARHGEF28	3	0.026087	8	0.0075543
ARHGEF37	3	0.026087	5	0.00472144
ARMC5	3	0.026087	8	0.0075543
ARNT2	3	0.026087	11	0.0103872
ARSD	3	0.026087	10	0.00944287
ASB1	3	0.026087	1	0.000944287
ASTN2	3	0.026087	5	0.00472144
ATG13	3	0.026087	2	0.00188857
ATG4A	3	0.026087	0	0
ATG9A	3	0.026087	1	0.000944287
ATIC	3	0.026087	1	0.000944287
ATM	3	0.026087	14	0.01322
ATP10D	3	0.026087	8	0.0075543
ATP13A2	3	0.026087	10	0.00944287
ATP13A5	3	0.026087	1	0.000944287
ATP1A1	3	0.026087	5	0.00472144
ATP1B4	3	0.026087	5	0.00472144
ATP4A	3	0.026087	11	0.0103872
ATP6V1H	3	0.026087	0	0
ATP7B	3	0.026087	13	0.0122757
ATP8A2	3	0.026087	16	0.0151086
ATP8B2	3	0.026087	5	0.00472144
ATP9A	3	0.026087	8	0.0075543
ATXN7L2	3	0.026087	6	0.00566572
AUTS2	3	0.026087	5	0.00472144
AXL	3	0.026087	7	0.00661001
B3GNT2	3	0.026087	6	0.00566572
B4GALNT4	3	0.026087	5	0.00472144
B4GALT4	3	0.026087	0	0
BAIAP3	3	0.026087	7	0.00661001
BCAM	3	0.026087	4	0.00377715
BCL11A	3	0.026087	22	0.0207743
BCLAF1	3	0.026087	18	0.0169972
BCOR	3	0.026087	21	0.01983
BDP1	3	0.026087	6	0.00566572
BEND2	3	0.026087	3	0.00283286
BLK	3	0.026087	5	0.00472144
BLM	3	0.026087	8	0.0075543
BMP2K	3	0.026087	6	0.00566572
BMP8A	3	0.026087	1	0.000944287
BMS1	3	0.026087	7	0.00661001
BPTF	3	0.026087	9	0.00849858
BRCA1	3	0.026087	14	0.01322
BRD1	3	0.026087	5	0.00472144
BUB1	3	0.026087	4	0.00377715
BUB3	3	0.026087	2	0.00188857
C15orf38-AP3S2	3	0.026087	3	0.00283286
C19orf12	3	0.026087	0	0
C1orf158	3	0.026087	0	0
C1R	3	0.026087	1	0.000944287
CACNA1G	3	0.026087	11	0.0103872
CAMSAP1	3	0.026087	7	0.00661001
CAMSAP2	3	0.026087	6	0.00566572
CAMTA1	3	0.026087	10	0.00944287
CAND1	3	0.026087	10	0.00944287
CAPN5	3	0.026087	6	0.00566572
CARD14	3	0.026087	6	0.00566572
CARD6	3	0.026087	14	0.01322
CARMIL3	3	0.026087	9	0.00849858
CASQ2	3	0.026087	2	0.00188857
CASR	3	0.026087	19	0.0179415
CATSPER2	3	0.026087	3	0.00283286
CATSPER4	3	0.026087	2	0.00188857
CATSPERD	3	0.026087	13	0.0122757
CCDC102B	3	0.026087	0	0
CCDC114	3	0.026087	3	0.00283286
CCDC149	3	0.026087	1	0.000944287
CCDC168	3	0.026087	6	0.00566572
CCDC17	3	0.026087	2	0.00188857
CCDC57	3	0.026087	1	0.000944287
CCNB3	3	0.026087	11	0.0103872
CD101	3	0.026087	6	0.00566572
CD46	3	0.026087	3	0.00283286
CDC27	3	0.026087	22	0.0207743
CDC42BPG	3	0.026087	7	0.00661001
CDC5L	3	0.026087	3	0.00283286
CDH15	3	0.026087	9	0.00849858
CDH18	3	0.026087	16	0.0151086
CDH20	3	0.026087	3	0.00283286
CDH23	3	0.026087	4	0.00377715
CDH4	3	0.026087	8	0.0075543
CDH8	3	0.026087	9	0.00849858
CDH9	3	0.026087	18	0.0169972
CDK12	3	0.026087	6	0.00566572
CDK5RAP2	3	0.026087	8	0.0075543
CDYL	3	0.026087	1	0.000944287
CELSR1	3	0.026087	26	0.0245515
CEMIP	3	0.026087	7	0.00661001
CENPC	3	0.026087	6	0.00566572
CENPT	3	0.026087	5	0.00472144
CEP250	3	0.026087	7	0.00661001
CEP290	3	0.026087	7	0.00661001
CEP295	3	0.026087	4	0.00377715
CERCAM	3	0.026087	6	0.00566572
CFAP100	3	0.026087	6	0.00566572
CFAP157	3	0.026087	1	0.000944287
CFAP53	3	0.026087	1	0.000944287
CFAP65	3	0.026087	13	0.0122757
CFHR4	3	0.026087	7	0.00661001
CFI	3	0.026087	7	0.00661001
CFTR	3	0.026087	11	0.0103872
CHD2	3	0.026087	6	0.00566572
CHD5	3	0.026087	20	0.0188857
CHD8	3	0.026087	10	0.00944287
CHEK2	3	0.026087	105	0.0991501
CHID1	3	0.026087	4	0.00377715
CHPF2	3	0.026087	6	0.00566572
CHRNA1	3	0.026087	1	0.000944287
CHST2	3	0.026087	9	0.00849858
CHTF18	3	0.026087	7	0.00661001
CLASP1	3	0.026087	10	0.00944287
CLASP2	3	0.026087	8	0.0075543
CLCA1	3	0.026087	6	0.00566572
CLCN4	3	0.026087	5	0.00472144
CLEC2B	3	0.026087	0	0
CLIP2	3	0.026087	10	0.00944287
CLN3	3	0.026087	3	0.00283286
CLSTN3	3	0.026087	9	0.00849858
CLUH	3	0.026087	5	0.00472144
CNGA2	3	0.026087	5	0.00472144
CNGA4	3	0.026087	7	0.00661001
CNNM1	3	0.026087	4	0.00377715
CNOT1	3	0.026087	16	0.0151086
CNST	3	0.026087	2	0.00188857
CNTN1	3	0.026087	7	0.00661001
COL11A1	3	0.026087	22	0.0207743
COL17A1	3	0.026087	14	0.01322
COL1A1	3	0.026087	14	0.01322
COL25A1	3	0.026087	5	0.00472144
COL27A1	3	0.026087	11	0.0103872
COL4A2	3	0.026087	14	0.01322
COL4A6	3	0.026087	13	0.0122757
COL5A1	3	0.026087	26	0.0245515
COL6A3	3	0.026087	45	0.0424929
COL7A1	3	0.026087	5	0.00472144
COLEC12	3	0.026087	4	0.00377715
COLGALT1	3	0.026087	5	0.00472144
COPG1	3	0.026087	6	0.00566572
CP	3	0.026087	5	0.00472144
CPLANE1	3	0.026087	7	0.00661001
CPNE5	3	0.026087	2	0.00188857
CPT1A	3	0.026087	4	0.00377715
CPXCR1	3	0.026087	3	0.00283286
CPXM2	3	0.026087	3	0.00283286
CREBBP	3	0.026087	19	0.0179415
CRIPAK	3	0.026087	9	0.00849858
CRNKL1	3	0.026087	3	0.00283286
CROCC	3	0.026087	21	0.01983
CSDE1	3	0.026087	9	0.00849858
CSF2RB	3	0.026087	8	0.0075543
CSRP3	3	0.026087	1	0.000944287
CSTF2	3	0.026087	8	0.0075543
CTBP1	3	0.026087	3	0.00283286
CTR9	3	0.026087	5	0.00472144
CUL7	3	0.026087	5	0.00472144
CXADR	3	0.026087	5	0.00472144
CXCR3	3	0.026087	3	0.00283286
CYFIP1	3	0.026087	6	0.00566572
CYP11A1	3	0.026087	5	0.00472144
CYP2A7	3	0.026087	7	0.00661001
CYP2E1	3	0.026087	1	0.000944287
CYP2S1	3	0.026087	4	0.00377715
CYP4F11	3	0.026087	13	0.0122757
CYS1	3	0.026087	0	0
CYTH4	3	0.026087	0	0
DACT1	3	0.026087	6	0.00566572
DAOA	3	0.026087	2	0.00188857
DAW1	3	0.026087	1	0.000944287
DCAF11	3	0.026087	3	0.00283286
DCAF8	3	0.026087	4	0.00377715
DCDC2	3	0.026087	1	0.000944287
DDHD1	3	0.026087	2	0.00188857
DDHD2	3	0.026087	1	0.000944287
DDR2	3	0.026087	9	0.00849858
DDRGK1	3	0.026087	1	0.000944287
DDX1	3	0.026087	3	0.00283286
DDX54	3	0.026087	5	0.00472144
DDX60	3	0.026087	7	0.00661001
DEF6	3	0.026087	1	0.000944287
DENND3	3	0.026087	10	0.00944287
DENND6B	3	0.026087	0	0
DGAT2	3	0.026087	1	0.000944287
DGKA	3	0.026087	4	0.00377715
DGKB	3	0.026087	5	0.00472144
DGKD	3	0.026087	16	0.0151086
DGKH	3	0.026087	3	0.00283286
DHX34	3	0.026087	10	0.00944287
DHX38	3	0.026087	3	0.00283286
DICER1	3	0.026087	10	0.00944287
DIDO1	3	0.026087	12	0.0113314
DIP2C	3	0.026087	7	0.00661001
DIS3L2	3	0.026087	12	0.0113314
DISP1	3	0.026087	2	0.00188857
DISP3	3	0.026087	6	0.00566572
DLAT	3	0.026087	1	0.000944287
DLG3	3	0.026087	4	0.00377715
DLGAP2	3	0.026087	12	0.0113314
DLGAP3	3	0.026087	2	0.00188857
DMD	3	0.026087	26	0.0245515
DMKN	3	0.026087	7	0.00661001
DMRT3	3	0.026087	9	0.00849858
DNAH1	3	0.026087	15	0.0141643
DNAH6	3	0.026087	15	0.0141643
DNAJB4	3	0.026087	0	0
DNAJC13	3	0.026087	9	0.00849858
DNAJC14	3	0.026087	2	0.00188857
DNAJC22	3	0.026087	2	0.00188857
DNASE2B	3	0.026087	1	0.000944287
DNM2	3	0.026087	6	0.00566572
DOCK1	3	0.026087	16	0.0151086
DOCK3	3	0.026087	7	0.00661001
DOCK6	3	0.026087	10	0.00944287
DOK3	3	0.026087	0	0
DPP3	3	0.026087	2	0.00188857
DSCAM	3	0.026087	11	0.0103872
DTX3	3	0.026087	3	0.00283286
DUSP16	3	0.026087	1	0.000944287
DUSP27	3	0.026087	16	0.0151086
DYSF	3	0.026087	18	0.0169972
DZIP1	3	0.026087	1	0.000944287
E2F2	3	0.026087	4	0.00377715
EAF2	3	0.026087	0	0
EBI3	3	0.026087	1	0.000944287
ECM1	3	0.026087	1	0.000944287
ECT2L	3	0.026087	6	0.00566572
EEPD1	3	0.026087	0	0
EFHC2	3	0.026087	1	0.000944287
EHBP1	3	0.026087	3	0.00283286
EIF2A	3	0.026087	1	0.000944287
EIF3B	3	0.026087	5	0.00472144
ELAVL3	3	0.026087	2	0.00188857
EMC1	3	0.026087	8	0.0075543
ENAM	3	0.026087	10	0.00944287
ENPP2	3	0.026087	13	0.0122757
ENPP7	3	0.026087	10	0.00944287
ENTPD1	3	0.026087	1	0.000944287
EP400	3	0.026087	23	0.0217186
EPC2	3	0.026087	3	0.00283286
EPG5	3	0.026087	11	0.0103872
EPHA5	3	0.026087	19	0.0179415
EPPK1	3	0.026087	32	0.0302172
EPRS	3	0.026087	4	0.00377715
ERCC6	3	0.026087	7	0.00661001
ERLIN2	3	0.026087	0	0
ETAA1	3	0.026087	2	0.00188857
EXOC1	3	0.026087	2	0.00188857
EXOC5	3	0.026087	0	0
EXOC7	3	0.026087	6	0.00566572
EXT2	3	0.026087	2	0.00188857
F11	3	0.026087	0	0
F13B	3	0.026087	2	0.00188857
F2	3	0.026087	7	0.00661001
F9	3	0.026087	12	0.0113314
FAM120A	3	0.026087	6	0.00566572
FAM129B	3	0.026087	5	0.00472144
FAM160B1	3	0.026087	1	0.000944287
FAM193B	3	0.026087	1	0.000944287
FAM208B	3	0.026087	7	0.00661001
FAM47A	3	0.026087	20	0.0188857
FAM53A	3	0.026087	0	0
FAM71E2	3	0.026087	5	0.00472144
FAM83G	3	0.026087	6	0.00566572
FARP2	3	0.026087	1	0.000944287
FARS2	3	0.026087	2	0.00188857
FARSB	3	0.026087	2	0.00188857
FASTKD3	3	0.026087	1	0.000944287
FAT1	3	0.026087	13	0.0122757
FBN2	3	0.026087	37	0.0349386
FBXL16	3	0.026087	3	0.00283286
FBXO21	3	0.026087	3	0.00283286
FBXO24	3	0.026087	5	0.00472144
FBXO25	3	0.026087	3	0.00283286
FBXO38	3	0.026087	7	0.00661001
FBXO40	3	0.026087	4	0.00377715
FBXO43	3	0.026087	5	0.00472144
FBXO7	3	0.026087	5	0.00472144
FBXW11	3	0.026087	7	0.00661001
FCRL2	3	0.026087	9	0.00849858
FER1L6	3	0.026087	18	0.0169972
FERMT1	3	0.026087	0	0
FERMT3	3	0.026087	3	0.00283286
FFAR1	3	0.026087	1	0.000944287
FGD3	3	0.026087	6	0.00566572
FGFR4	3	0.026087	4	0.00377715
FHL1	3	0.026087	4	0.00377715
FILIP1	3	0.026087	9	0.00849858
FITM1	3	0.026087	1	0.000944287
FLII	3	0.026087	7	0.00661001
FLNA	3	0.026087	18	0.0169972
FLNC	3	0.026087	20	0.0188857
FLT3LG	3	0.026087	2	0.00188857
FMN2	3	0.026087	8	0.0075543
FNDC3B	3	0.026087	10	0.00944287
FOLH1	3	0.026087	10	0.00944287
FRMPD3	3	0.026087	4	0.00377715
FSCN2	3	0.026087	1	0.000944287
FSHR	3	0.026087	2	0.00188857
FUT10	3	0.026087	4	0.00377715
FUT4	3	0.026087	1	0.000944287
FZD1	3	0.026087	5	0.00472144
FZD10	3	0.026087	4	0.00377715
FZD5	3	0.026087	2	0.00188857
FZD7	3	0.026087	3	0.00283286
G2E3	3	0.026087	1	0.000944287
GALNT13	3	0.026087	3	0.00283286
GALNT17	3	0.026087	26	0.0245515
GAMT	3	0.026087	1	0.000944287
GART	3	0.026087	2	0.00188857
GASK1A	3	0.026087	3	0.00283286
GATA3	3	0.026087	4	0.00377715
GBGT1	3	0.026087	4	0.00377715
GBP5	3	0.026087	5	0.00472144
GCN1	3	0.026087	13	0.0122757
GCOM1	3	0.026087	2	0.00188857
GDPD4	3	0.026087	7	0.00661001
GEMIN2	3	0.026087	1	0.000944287
GFM2	3	0.026087	4	0.00377715
GK2	3	0.026087	7	0.00661001
GLE1	3	0.026087	3	0.00283286
GLI3	3	0.026087	15	0.0141643
GNAI2	3	0.026087	0	0
GOLGA3	3	0.026087	8	0.0075543
GOLGA4	3	0.026087	8	0.0075543
GP6	3	0.026087	2	0.00188857
GPAT2	3	0.026087	6	0.00566572
GPC1	3	0.026087	2	0.00188857
GPR174	3	0.026087	9	0.00849858
GPR27	3	0.026087	1	0.000944287
GPR4	3	0.026087	3	0.00283286
GPRIN2	3	0.026087	12	0.0113314
GRAMD2A	3	0.026087	3	0.00283286
GRHL2	3	0.026087	5	0.00472144
GRIA3	3	0.026087	12	0.0113314
GRIN2B	3	0.026087	25	0.0236072
GRIN3A	3	0.026087	11	0.0103872
GRM1	3	0.026087	10	0.00944287
GRM2	3	0.026087	6	0.00566572
GRM4	3	0.026087	18	0.0169972
GRTP1	3	0.026087	2	0.00188857
GTF2H3	3	0.026087	1	0.000944287
GTF2IRD1	3	0.026087	5	0.00472144
GZMB	3	0.026087	4	0.00377715
HARS	3	0.026087	6	0.00566572
HAUS5	3	0.026087	2	0.00188857
HCAR2	3	0.026087	6	0.00566572
HCFC1	3	0.026087	7	0.00661001
HCN1	3	0.026087	50	0.0472144
HDAC7	3	0.026087	4	0.00377715
HECW1	3	0.026087	17	0.0160529
HEMGN	3	0.026087	5	0.00472144
HEPH	3	0.026087	9	0.00849858
HEPHL1	3	0.026087	9	0.00849858
HIRIP3	3	0.026087	2	0.00188857
HIVEP1	3	0.026087	12	0.0113314
HLF	3	0.026087	6	0.00566572
HNF1B	3	0.026087	11	0.0103872
HOXB3	3	0.026087	7	0.00661001
HRH3	3	0.026087	4	0.00377715
HSD17B1	3	0.026087	2	0.00188857
HSD17B10	3	0.026087	0	0
HSD17B6	3	0.026087	0	0
HSPA12A	3	0.026087	6	0.00566572
HSPA2	3	0.026087	3	0.00283286
HTATSF1	3	0.026087	5	0.00472144
HTR3E	3	0.026087	7	0.00661001
IDH2	3	0.026087	2	0.00188857
IFI44	3	0.026087	1	0.000944287
IFRD2	3	0.026087	3	0.00283286
IFT140	3	0.026087	8	0.0075543
IFT172	3	0.026087	11	0.0103872
IGDCC3	3	0.026087	6	0.00566572
IGF2R	3	0.026087	16	0.0151086
IGFALS	3	0.026087	3	0.00283286
IGHMBP2	3	0.026087	4	0.00377715
IGSF1	3	0.026087	5	0.00472144
IGSF10	3	0.026087	13	0.0122757
IGSF3	3	0.026087	20	0.0188857
IGSF9	3	0.026087	7	0.00661001
IL12RB1	3	0.026087	12	0.0113314
IL17RA	3	0.026087	3	0.00283286
IL1R1	3	0.026087	11	0.0103872
IL1RAPL2	3	0.026087	9	0.00849858
IL21R	3	0.026087	5	0.00472144
IL22	3	0.026087	1	0.000944287
INO80	3	0.026087	7	0.00661001
INO80D	3	0.026087	3	0.00283286
INTS13	3	0.026087	3	0.00283286
IP6K1	3	0.026087	1	0.000944287
IRF1	3	0.026087	2	0.00188857
IRS1	3	0.026087	8	0.0075543
ITFG3	3	0.026087	0	0
ITGA1	3	0.026087	6	0.00566572
ITGAD	3	0.026087	17	0.0160529
ITGAL	3	0.026087	3	0.00283286
ITGB1	3	0.026087	2	0.00188857
ITGB8	3	0.026087	4	0.00377715
ITIH2	3	0.026087	9	0.00849858
ITIH5	3	0.026087	8	0.0075543
ITPR1	3	0.026087	19	0.0179415
ITPR2	3	0.026087	13	0.0122757
ITPR3	3	0.026087	14	0.01322
JARID2	3	0.026087	9	0.00849858
JCAD	3	0.026087	11	0.0103872
KALRN	3	0.026087	15	0.0141643
KANK1	3	0.026087	13	0.0122757
KAT2B	3	0.026087	2	0.00188857
KBTBD6	3	0.026087	3	0.00283286
KCNA1	3	0.026087	4	0.00377715
KCNA4	3	0.026087	9	0.00849858
KCNB2	3	0.026087	17	0.0160529
KCNC2	3	0.026087	13	0.0122757
KCNC4	3	0.026087	7	0.00661001
KCND1	3	0.026087	7	0.00661001
KCNH3	3	0.026087	2	0.00188857
KCNH6	3	0.026087	10	0.00944287
KCNJ12	3	0.026087	23	0.0217186
KCNJ16	3	0.026087	2	0.00188857
KCNK4	3	0.026087	0	0
KCTD3	3	0.026087	0	0
KDM2B	3	0.026087	7	0.00661001
KDM3B	3	0.026087	9	0.00849858
KDM5B	3	0.026087	3	0.00283286
KDM5C	3	0.026087	8	0.0075543
KDM6B	3	0.026087	7	0.00661001
KEL	3	0.026087	28	0.02644
KIAA0355	3	0.026087	7	0.00661001
KIAA0556	3	0.026087	9	0.00849858
KIAA1324	3	0.026087	2	0.00188857
KIAA1614	3	0.026087	5	0.00472144
KIF13A	3	0.026087	11	0.0103872
KIF14	3	0.026087	8	0.0075543
KIF1C	3	0.026087	5	0.00472144
KIF20A	3	0.026087	6	0.00566572
KIF22	3	0.026087	2	0.00188857
KIR3DL3	3	0.026087	10	0.00944287
KLC2	3	0.026087	5	0.00472144
KLC4	3	0.026087	2	0.00188857
KLHDC7B	3	0.026087	1	0.000944287
KLHL15	3	0.026087	5	0.00472144
KLHL31	3	0.026087	2	0.00188857
KLHL38	3	0.026087	2	0.00188857
KLHL6	3	0.026087	5	0.00472144
KLK15	3	0.026087	9	0.00849858
KMT2D	3	0.026087	24	0.0226629
KPNA2	3	0.026087	14	0.01322
KPNB1	3	0.026087	2	0.00188857
KPRP	3	0.026087	22	0.0207743
KRT40	3	0.026087	3	0.00283286
KRT5	3	0.026087	2	0.00188857
KRT75	3	0.026087	5	0.00472144
KRT82	3	0.026087	3	0.00283286
KRTAP4-11	3	0.026087	18	0.0169972
KRTAP4-3	3	0.026087	4	0.00377715
KRTAP4-8	3	0.026087	9	0.00849858
LAIR1	3	0.026087	4	0.00377715
LAMB3	3	0.026087	13	0.0122757
LARGE2	3	0.026087	9	0.00849858
LARP4B	3	0.026087	6	0.00566572
LARS2	3	0.026087	5	0.00472144
LATS2	3	0.026087	3	0.00283286
LCK	3	0.026087	5	0.00472144
LEPR	3	0.026087	1	0.000944287
LFNG	3	0.026087	2	0.00188857
LGI1	3	0.026087	1	0.000944287
LGR6	3	0.026087	11	0.0103872
LILRA1	3	0.026087	6	0.00566572
LILRA2	3	0.026087	5	0.00472144
LMNB1	3	0.026087	1	0.000944287
LMNB2	3	0.026087	2	0.00188857
LMO7	3	0.026087	9	0.00849858
LMX1A	3	0.026087	4	0.00377715
LONRF3	3	0.026087	4	0.00377715
LOXHD1	3	0.026087	7	0.00661001
LOXL4	3	0.026087	4	0.00377715
LPA	3	0.026087	12	0.0113314
LPAR3	3	0.026087	4	0.00377715
LPIN1	3	0.026087	6	0.00566572
LPXN	3	0.026087	2	0.00188857
LRP1	3	0.026087	28	0.02644
LRP3	3	0.026087	10	0.00944287
LRP5	3	0.026087	14	0.01322
LRRC15	3	0.026087	5	0.00472144
LRRC30	3	0.026087	5	0.00472144
LRRC43	3	0.026087	5	0.00472144
LRRC4C	3	0.026087	13	0.0122757
LRRC8D	3	0.026087	4	0.00377715
LRRIQ1	3	0.026087	24	0.0226629
LRWD1	3	0.026087	5	0.00472144
LTBP1	3	0.026087	5	0.00472144
LY75	3	0.026087	13	0.0122757
LY75-CD302	3	0.026087	13	0.0122757
LY9	3	0.026087	7	0.00661001
LYSMD4	3	0.026087	3	0.00283286
LYST	3	0.026087	18	0.0169972
MAD1L1	3	0.026087	7	0.00661001
MALT1	3	0.026087	6	0.00566572
MAML3	3	0.026087	8	0.0075543
MAN1A1	3	0.026087	3	0.00283286
MAN1B1	3	0.026087	3	0.00283286
MAN2C1	3	0.026087	6	0.00566572
MAP1A	3	0.026087	9	0.00849858
MAP3K1	3	0.026087	15	0.0141643
MAP3K10	3	0.026087	5	0.00472144
MAP3K15	3	0.026087	12	0.0113314
MAP3K19	3	0.026087	18	0.0169972
MAP3K4	3	0.026087	10	0.00944287
MAP3K6	3	0.026087	16	0.0151086
MAP4K4	3	0.026087	7	0.00661001
MAPK8IP1	3	0.026087	5	0.00472144
MAPK8IP2	3	0.026087	7	0.00661001
MAPK8IP3	3	0.026087	7	0.00661001
MARCH6	3	0.026087	5	0.00472144
MAST1	3	0.026087	9	0.00849858
MAST4	3	0.026087	12	0.0113314
MBD4	3	0.026087	2	0.00188857
MBD5	3	0.026087	6	0.00566572
MC3R	3	0.026087	11	0.0103872
MCCC1	3	0.026087	2	0.00188857
MCHR1	3	0.026087	2	0.00188857
MCM2	3	0.026087	4	0.00377715
MCM3AP	3	0.026087	10	0.00944287
MCOLN2	3	0.026087	7	0.00661001
MDM4	3	0.026087	4	0.00377715
MDN1	3	0.026087	15	0.0141643
MED12	3	0.026087	21	0.01983
MED12L	3	0.026087	7	0.00661001
MED13	3	0.026087	9	0.00849858
MEFV	3	0.026087	5	0.00472144
MEGF10	3	0.026087	7	0.00661001
MEGF6	3	0.026087	13	0.0122757
MEGF8	3	0.026087	11	0.0103872
MET	3	0.026087	21	0.01983
METAP2	3	0.026087	1	0.000944287
MFGE8	3	0.026087	4	0.00377715
MFN2	3	0.026087	2	0.00188857
MFSD6L	3	0.026087	8	0.0075543
MGAT3	3	0.026087	2	0.00188857
MIB1	3	0.026087	7	0.00661001
MIS18BP1	3	0.026087	4	0.00377715
MKI67	3	0.026087	21	0.01983
MKX	3	0.026087	4	0.00377715
MLC1	3	0.026087	2	0.00188857
MLK4	3	0.026087	9	0.00849858
MMEL1	3	0.026087	10	0.00944287
MMP20	3	0.026087	2	0.00188857
MN1	3	0.026087	4	0.00377715
MOGS	3	0.026087	6	0.00566572
MPHOSPH8	3	0.026087	5	0.00472144
MRC2	3	0.026087	7	0.00661001
MRPL55	3	0.026087	1	0.000944287
MRVI1	3	0.026087	5	0.00472144
MSH3	3	0.026087	5	0.00472144
MTHFD1	3	0.026087	4	0.00377715
MTHFR	3	0.026087	3	0.00283286
MTM1	3	0.026087	4	0.00377715
MTNR1B	3	0.026087	5	0.00472144
MUSK	3	0.026087	11	0.0103872
MVP	3	0.026087	4	0.00377715
MYB	3	0.026087	7	0.00661001
MYBBP1A	3	0.026087	8	0.0075543
MYCBP2	3	0.026087	8	0.0075543
MYEF2	3	0.026087	2	0.00188857
MYH11	3	0.026087	27	0.0254958
MYH14	3	0.026087	13	0.0122757
MYH15	3	0.026087	11	0.0103872
MYH2	3	0.026087	26	0.0245515
MYH4	3	0.026087	19	0.0179415
MYH6	3	0.026087	20	0.0188857
MYLK2	3	0.026087	5	0.00472144
MYO15A	3	0.026087	28	0.02644
MYO18A	3	0.026087	8	0.0075543
MYO1A	3	0.026087	8	0.0075543
MYO3A	3	0.026087	20	0.0188857
MYPN	3	0.026087	6	0.00566572
MYT1	3	0.026087	7	0.00661001
MYZAP	3	0.026087	1	0.000944287
N4BP2L2	3	0.026087	3	0.00283286
NAALAD2	3	0.026087	9	0.00849858
NALCN	3	0.026087	11	0.0103872
NAV2	3	0.026087	16	0.0151086
NBEA	3	0.026087	13	0.0122757
NBEAL1	3	0.026087	11	0.0103872
NCAPG2	3	0.026087	3	0.00283286
NCF4	3	0.026087	2	0.00188857
NCK2	3	0.026087	2	0.00188857
NCOA2	3	0.026087	5	0.00472144
NCOA7	3	0.026087	3	0.00283286
NDUFS2	3	0.026087	2	0.00188857
NELL2	3	0.026087	6	0.00566572
NEO1	3	0.026087	7	0.00661001
NEPRO	3	0.026087	2	0.00188857
NFASC	3	0.026087	6	0.00566572
NFATC2	3	0.026087	10	0.00944287
NFE2L2	3	0.026087	1	0.000944287
NFKB1	3	0.026087	3	0.00283286
NHP2	3	0.026087	0	0
NHS	3	0.026087	7	0.00661001
NID2	3	0.026087	3	0.00283286
NIN	3	0.026087	8	0.0075543
NKD2	3	0.026087	4	0.00377715
NKTR	3	0.026087	4	0.00377715
NLGN4X	3	0.026087	2	0.00188857
NLN	3	0.026087	1	0.000944287
NLRC4	3	0.026087	5	0.00472144
NLRP12	3	0.026087	22	0.0207743
NLRP2	3	0.026087	16	0.0151086
NMT2	3	0.026087	3	0.00283286
NNT	3	0.026087	3	0.00283286
NOLC1	3	0.026087	2	0.00188857
NOP9	3	0.026087	4	0.00377715
NOS2	3	0.026087	5	0.00472144
NOTCH3	3	0.026087	17	0.0160529
NPAP1	3	0.026087	20	0.0188857
NPAS3	3	0.026087	5	0.00472144
NPFFR2	3	0.026087	8	0.0075543
NPHP4	3	0.026087	11	0.0103872
NRAP	3	0.026087	5	0.00472144
NRIP1	3	0.026087	8	0.0075543
NRXN2	3	0.026087	8	0.0075543
NTNG1	3	0.026087	1	0.000944287
ODF2	3	0.026087	4	0.00377715
OGDH	3	0.026087	7	0.00661001
OGFOD1	3	0.026087	2	0.00188857
OPN1SW	3	0.026087	4	0.00377715
OR10A5	3	0.026087	0	0
OR10A6	3	0.026087	4	0.00377715
OR10V1	3	0.026087	5	0.00472144
OR1L8	3	0.026087	2	0.00188857
OR1M1	3	0.026087	3	0.00283286
OR3A1	3	0.026087	2	0.00188857
OR4C6	3	0.026087	5	0.00472144
OR4K5	3	0.026087	14	0.01322
OR51V1	3	0.026087	2	0.00188857
OR52N5	3	0.026087	2	0.00188857
OR5AN1	3	0.026087	4	0.00377715
OR5D18	3	0.026087	13	0.0122757
OR5L1	3	0.026087	4	0.00377715
OR6K2	3	0.026087	2	0.00188857
OR6K3	3	0.026087	2	0.00188857
OR6K6	3	0.026087	1	0.000944287
OR6Y1	3	0.026087	3	0.00283286
OR7C2	3	0.026087	3	0.00283286
OR8K1	3	0.026087	6	0.00566572
ORMDL3	3	0.026087	3	0.00283286
OSBP2	3	0.026087	9	0.00849858
OSBPL5	3	0.026087	4	0.00377715
OSGIN2	3	0.026087	3	0.00283286
OTOP3	3	0.026087	11	0.0103872
OTUB1	3	0.026087	2	0.00188857
OTUB2	3	0.026087	4	0.00377715
OTX1	3	0.026087	3	0.00283286
P3H1	3	0.026087	5	0.00472144
PAH	3	0.026087	4	0.00377715
PAK4	3	0.026087	3	0.00283286
PALM2-AKAP2	3	0.026087	17	0.0160529
PANX2	3	0.026087	4	0.00377715
PAPPA2	3	0.026087	15	0.0141643
PAPSS1	3	0.026087	3	0.00283286
PARG	3	0.026087	3	0.00283286
PARN	3	0.026087	1	0.000944287
PASK	3	0.026087	8	0.0075543
PCARE	3	0.026087	6	0.00566572
PCDH1	3	0.026087	6	0.00566572
PCDH18	3	0.026087	10	0.00944287
PCDH19	3	0.026087	12	0.0113314
PCDHA13	3	0.026087	17	0.0160529
PCDHA8	3	0.026087	10	0.00944287
PCDHB14	3	0.026087	4	0.00377715
PCDHGA10	3	0.026087	5	0.00472144
PCDHGA11	3	0.026087	5	0.00472144
PCDHGA12	3	0.026087	3	0.00283286
PCDHGC4	3	0.026087	4	0.00377715
PCLO	3	0.026087	57	0.0538244
PCM1	3	0.026087	5	0.00472144
PCMTD1	3	0.026087	10	0.00944287
PCNT	3	0.026087	12	0.0113314
PCSK5	3	0.026087	7	0.00661001
PDGFRA	3	0.026087	39	0.0368272
PDIA3	3	0.026087	3	0.00283286
PDILT	3	0.026087	14	0.01322
PDLIM7	3	0.026087	4	0.00377715
PDS5B	3	0.026087	4	0.00377715
PDZD3	3	0.026087	4	0.00377715
PDZRN4	3	0.026087	11	0.0103872
PEAK1	3	0.026087	8	0.0075543
PEX5	3	0.026087	4	0.00377715
PFKP	3	0.026087	1	0.000944287
PGK2	3	0.026087	5	0.00472144
PHF2	3	0.026087	9	0.00849858
PHF21A	3	0.026087	3	0.00283286
PHKA1	3	0.026087	7	0.00661001
PHLDB1	3	0.026087	2	0.00188857
PIAS2	3	0.026087	2	0.00188857
PICK1	3	0.026087	4	0.00377715
PIEZO1	3	0.026087	5	0.00472144
PIEZO2	3	0.026087	16	0.0151086
PIGC	3	0.026087	1	0.000944287
PIGQ	3	0.026087	1	0.000944287
PIP5K1C	3	0.026087	2	0.00188857
PITPNM1	3	0.026087	4	0.00377715
PITPNM3	3	0.026087	8	0.0075543
PJA2	3	0.026087	2	0.00188857
PKD1	3	0.026087	20	0.0188857
PKP1	3	0.026087	5	0.00472144
PKP4	3	0.026087	5	0.00472144
PLA2G7	3	0.026087	4	0.00377715
PLCB1	3	0.026087	7	0.00661001
PLCH1	3	0.026087	5	0.00472144
PLD3	3	0.026087	2	0.00188857
PLD4	3	0.026087	2	0.00188857
PLEK	3	0.026087	0	0
PLEKHA6	3	0.026087	11	0.0103872
PLEKHG3	3	0.026087	6	0.00566572
PLEKHH1	3	0.026087	2	0.00188857
PLEKHM3	3	0.026087	5	0.00472144
PLEKHO2	3	0.026087	2	0.00188857
PLXNB1	3	0.026087	11	0.0103872
PLXNC1	3	0.026087	6	0.00566572
PML	3	0.026087	8	0.0075543
PMS2	3	0.026087	6	0.00566572
PNPLA6	3	0.026087	8	0.0075543
PNPT1	3	0.026087	1	0.000944287
POGZ	3	0.026087	3	0.00283286
POLDIP2	3	0.026087	0	0
POLG	3	0.026087	7	0.00661001
POLR2B	3	0.026087	1	0.000944287
POLR3A	3	0.026087	5	0.00472144
POLR3E	3	0.026087	4	0.00377715
POU1F1	3	0.026087	4	0.00377715
POU3F2	3	0.026087	1	0.000944287
PPARA	3	0.026087	3	0.00283286
PPP1R35	3	0.026087	0	0
PPP4R3A	3	0.026087	5	0.00472144
PRAME	3	0.026087	6	0.00566572
PRDM11	3	0.026087	3	0.00283286
PRDM9	3	0.026087	34	0.0321058
PRELP	3	0.026087	0	0
PRICKLE2	3	0.026087	4	0.00377715
PRKCD	3	0.026087	7	0.00661001
PRKCH	3	0.026087	4	0.00377715
PRKDC	3	0.026087	12	0.0113314
PRPF6	3	0.026087	3	0.00283286
PRR14L	3	0.026087	3	0.00283286
PRRG3	3	0.026087	2	0.00188857
PRSS12	3	0.026087	8	0.0075543
PRUNE2	3	0.026087	12	0.0113314
PSD3	3	0.026087	6	0.00566572
PSG3	3	0.026087	2	0.00188857
PSMD2	3	0.026087	4	0.00377715
PTGFRN	3	0.026087	4	0.00377715
PTH1R	3	0.026087	4	0.00377715
PTPN13	3	0.026087	6	0.00566572
PTPN21	3	0.026087	6	0.00566572
PTPN3	3	0.026087	9	0.00849858
PTPRB	3	0.026087	15	0.0141643
PTPRJ	3	0.026087	4	0.00377715
PTPRS	3	0.026087	11	0.0103872
PTPRU	3	0.026087	15	0.0141643
PTPRZ1	3	0.026087	15	0.0141643
PUM2	3	0.026087	5	0.00472144
PYGB	3	0.026087	7	0.00661001
PYGL	3	0.026087	5	0.00472144
QRICH2	3	0.026087	12	0.0113314
R3HDM2	3	0.026087	0	0
RAB11FIP4	3	0.026087	2	0.00188857
RAB25	3	0.026087	0	0
RABEP2	3	0.026087	3	0.00283286
RABGAP1	3	0.026087	4	0.00377715
RAC2	3	0.026087	0	0
RAD54L2	3	0.026087	8	0.0075543
RADX	3	0.026087	11	0.0103872
RALGDS	3	0.026087	3	0.00283286
RANBP6	3	0.026087	9	0.00849858
RAP2A	3	0.026087	0	0
RARG	3	0.026087	1	0.000944287
RASEF	3	0.026087	4	0.00377715
RASGEF1A	3	0.026087	2	0.00188857
RASGRF1	3	0.026087	11	0.0103872
RBBP7	3	0.026087	1	0.000944287
RBM15B	3	0.026087	3	0.00283286
RBM25	3	0.026087	5	0.00472144
RBM6	3	0.026087	7	0.00661001
RBMXL3	3	0.026087	7	0.00661001
RCBTB2	3	0.026087	5	0.00472144
RELN	3	0.026087	49	0.0462701
RELT	3	0.026087	1	0.000944287
RERE	3	0.026087	9	0.00849858
RET	3	0.026087	6	0.00566572
REV3L	3	0.026087	4	0.00377715
RFC1	3	0.026087	5	0.00472144
RFX5	3	0.026087	3	0.00283286
RFX6	3	0.026087	11	0.0103872
RGR	3	0.026087	1	0.000944287
RGS12	3	0.026087	9	0.00849858
RGS3	3	0.026087	3	0.00283286
RHAG	3	0.026087	6	0.00566572
RHBDD1	3	0.026087	1	0.000944287
RHBDD2	3	0.026087	2	0.00188857
RIMS2	3	0.026087	34	0.0321058
RIMS4	3	0.026087	2	0.00188857
RIOX2	3	0.026087	5	0.00472144
RIPK3	3	0.026087	1	0.000944287
RIPK4	3	0.026087	16	0.0151086
RNASE1	3	0.026087	1	0.000944287
RNF103	3	0.026087	1	0.000944287
RNF123	3	0.026087	5	0.00472144
RNF152	3	0.026087	0	0
RNF31	3	0.026087	4	0.00377715
RNF32	3	0.026087	3	0.00283286
RNPEP	3	0.026087	1	0.000944287
ROBO2	3	0.026087	8	0.0075543
ROBO4	3	0.026087	9	0.00849858
ROCK1	3	0.026087	9	0.00849858
RP11-468E2.6	3	0.026087	0	0
RPGRIP1L	3	0.026087	7	0.00661001
RRBP1	3	0.026087	3	0.00283286
RREB1	3	0.026087	9	0.00849858
RSPO1	3	0.026087	4	0.00377715
RSPO3	3	0.026087	3	0.00283286
RSU1	3	0.026087	1	0.000944287
RTEL1	3	0.026087	7	0.00661001
RTL1	3	0.026087	9	0.00849858
RTL9	3	0.026087	5	0.00472144
RTN4RL2	3	0.026087	4	0.00377715
RUSC2	3	0.026087	7	0.00661001
RXFP2	3	0.026087	3	0.00283286
S100A4	3	0.026087	0	0
SAE1	3	0.026087	1	0.000944287
SALL4	3	0.026087	21	0.01983
SAMD9L	3	0.026087	15	0.0141643
SAMM50	3	0.026087	0	0
SARDH	3	0.026087	5	0.00472144
SBF2	3	0.026087	3	0.00283286
SBSN	3	0.026087	10	0.00944287
SCAPER	3	0.026087	4	0.00377715
SCN3A	3	0.026087	15	0.0141643
SCN8A	3	0.026087	10	0.00944287
SCN9A	3	0.026087	28	0.02644
SCNN1B	3	0.026087	8	0.0075543
SCTR	3	0.026087	6	0.00566572
SEC14L1	3	0.026087	2	0.00188857
SEC24B	3	0.026087	3	0.00283286
SEC31A	3	0.026087	6	0.00566572
SEC63	3	0.026087	6	0.00566572
SEL1L2	3	0.026087	4	0.00377715
SEL1L3	3	0.026087	3	0.00283286
SEMA3A	3	0.026087	4	0.00377715
SEMA4B	3	0.026087	3	0.00283286
SENP3	3	0.026087	7	0.00661001
SENP6	3	0.026087	3	0.00283286
SENP7	3	0.026087	9	0.00849858
SERPINB3	3	0.026087	8	0.0075543
SETD1A	3	0.026087	14	0.01322
SEZ6L2	3	0.026087	9	0.00849858
SF3B1	3	0.026087	8	0.0075543
SFI1	3	0.026087	9	0.00849858
SFTPD	3	0.026087	2	0.00188857
SGMS1	3	0.026087	1	0.000944287
SH2D3C	3	0.026087	8	0.0075543
SH3D19	3	0.026087	5	0.00472144
SH3TC1	3	0.026087	5	0.00472144
SHANK3	3	0.026087	10	0.00944287
SHISA2	3	0.026087	4	0.00377715
SHMT1	3	0.026087	2	0.00188857
SHPRH	3	0.026087	7	0.00661001
SHROOM1	3	0.026087	1	0.000944287
SHROOM3	3	0.026087	8	0.0075543
SIGLEC11	3	0.026087	9	0.00849858
SIGLEC8	3	0.026087	15	0.0141643
SIK1	3	0.026087	4	0.00377715
SIRT1	3	0.026087	1	0.000944287
SLC10A6	3	0.026087	2	0.00188857
SLC12A2	3	0.026087	4	0.00377715
SLC12A3	3	0.026087	6	0.00566572
SLC15A1	3	0.026087	5	0.00472144
SLC16A2	3	0.026087	3	0.00283286
SLC16A8	3	0.026087	1	0.000944287
SLC1A5	3	0.026087	1	0.000944287
SLC22A11	3	0.026087	7	0.00661001
SLC22A12	3	0.026087	5	0.00472144
SLC22A23	3	0.026087	3	0.00283286
SLC22A25	3	0.026087	7	0.00661001
SLC24A1	3	0.026087	3	0.00283286
SLC25A18	3	0.026087	1	0.000944287
SLC25A41	3	0.026087	2	0.00188857
SLC27A2	3	0.026087	7	0.00661001
SLC27A6	3	0.026087	10	0.00944287
SLC28A1	3	0.026087	8	0.0075543
SLC35A5	3	0.026087	3	0.00283286
SLC35D2	3	0.026087	0	0
SLC38A10	3	0.026087	6	0.00566572
SLC38A5	3	0.026087	4	0.00377715
SLC39A3	3	0.026087	2	0.00188857
SLC39A5	3	0.026087	1	0.000944287
SLC3A1	3	0.026087	7	0.00661001
SLC4A8	3	0.026087	4	0.00377715
SLC5A8	3	0.026087	5	0.00472144
SLC6A1	3	0.026087	6	0.00566572
SLC6A13	3	0.026087	5	0.00472144
SLC6A18	3	0.026087	10	0.00944287
SLC6A19	3	0.026087	13	0.0122757
SLC6A2	3	0.026087	3	0.00283286
SLC7A10	3	0.026087	4	0.00377715
SLC7A14	3	0.026087	9	0.00849858
SLC7A3	3	0.026087	7	0.00661001
SLC9A6	3	0.026087	6	0.00566572
SLC9C2	3	0.026087	8	0.0075543
SLCO1C1	3	0.026087	1	0.000944287
SLCO5A1	3	0.026087	22	0.0207743
SLCO6A1	3	0.026087	27	0.0254958
SLFN11	3	0.026087	14	0.01322
SLITRK1	3	0.026087	4	0.00377715
SLITRK2	3	0.026087	9	0.00849858
SMARCD3	3	0.026087	1	0.000944287
SMC2	3	0.026087	5	0.00472144
SMPD1	3	0.026087	4	0.00377715
SNAP47	3	0.026087	2	0.00188857
SND1	3	0.026087	3	0.00283286
SNRNP200	3	0.026087	8	0.0075543
SNUPN	3	0.026087	1	0.000944287
SOCS6	3	0.026087	4	0.00377715
SORBS3	3	0.026087	0	0
SORL1	3	0.026087	7	0.00661001
SOX3	3	0.026087	12	0.0113314
SOX30	3	0.026087	4	0.00377715
SOX4	3	0.026087	2	0.00188857
SP1	3	0.026087	4	0.00377715
SP6	3	0.026087	4	0.00377715
SPAG5	3	0.026087	7	0.00661001
SPAG9	3	0.026087	8	0.0075543
SPATA22	3	0.026087	4	0.00377715
SPATA31D1	3	0.026087	14	0.01322
SPATA48	3	0.026087	1	0.000944287
SPDYE1	3	0.026087	2	0.00188857
SPHKAP	3	0.026087	15	0.0141643
SPINT1	3	0.026087	10	0.00944287
SPNS3	3	0.026087	4	0.00377715
SPOCD1	3	0.026087	8	0.0075543
SPOCK3	3	0.026087	9	0.00849858
SPP2	3	0.026087	3	0.00283286
SPTB	3	0.026087	11	0.0103872
SPTBN4	3	0.026087	17	0.0160529
SPTLC3	3	0.026087	11	0.0103872
SPZ1	3	0.026087	2	0.00188857
SRCAP	3	0.026087	15	0.0141643
SRCIN1	3	0.026087	1	0.000944287
SRRM2	3	0.026087	13	0.0122757
SRRT	3	0.026087	6	0.00566572
SSTR2	3	0.026087	6	0.00566572
ST14	3	0.026087	7	0.00661001
STAB1	3	0.026087	13	0.0122757
STAB2	3	0.026087	16	0.0151086
STAG1	3	0.026087	5	0.00472144
STARD13	3	0.026087	9	0.00849858
STARD9	3	0.026087	2	0.00188857
STAT6	3	0.026087	3	0.00283286
STIM1	3	0.026087	5	0.00472144
STK39	3	0.026087	2	0.00188857
SUGCT	3	0.026087	3	0.00283286
SULF2	3	0.026087	7	0.00661001
SUPT6H	3	0.026087	12	0.0113314
SUSD3	3	0.026087	5	0.00472144
SUZ12	3	0.026087	1	0.000944287
SVEP1	3	0.026087	19	0.0179415
SVIL	3	0.026087	25	0.0236072
SYMPK	3	0.026087	6	0.00566572
SYNJ1	3	0.026087	4	0.00377715
TAF15	3	0.026087	3	0.00283286
TANC1	3	0.026087	11	0.0103872
TATDN2	3	0.026087	1	0.000944287
TBC1D21	3	0.026087	2	0.00188857
TBC1D25	3	0.026087	4	0.00377715
TBC1D8B	3	0.026087	11	0.0103872
TBX22	3	0.026087	9	0.00849858
TCEA3	3	0.026087	2	0.00188857
TCF25	3	0.026087	3	0.00283286
TCOF1	3	0.026087	3	0.00283286
TDRD6	3	0.026087	13	0.0122757
TDRD7	3	0.026087	6	0.00566572
TDRD9	3	0.026087	9	0.00849858
TENM1	3	0.026087	18	0.0169972
TENM2	3	0.026087	13	0.0122757
TENM3	3	0.026087	29	0.0273843
TENM4	3	0.026087	13	0.0122757
TET1	3	0.026087	8	0.0075543
TET3	3	0.026087	6	0.00566572
TEX11	3	0.026087	11	0.0103872
TFCP2L1	3	0.026087	2	0.00188857
TFIP11	3	0.026087	3	0.00283286
TFPI	3	0.026087	1	0.000944287
TGFBR1	3	0.026087	4	0.00377715
TGM1	3	0.026087	9	0.00849858
THAP9	3	0.026087	2	0.00188857
THSD4	3	0.026087	12	0.0113314
THSD7A	3	0.026087	12	0.0113314
TIMD4	3	0.026087	15	0.0141643
TIMELESS	3	0.026087	5	0.00472144
TJAP1	3	0.026087	4	0.00377715
TJP1	3	0.026087	4	0.00377715
TJP3	3	0.026087	10	0.00944287
TLDC2	3	0.026087	5	0.00472144
TLN1	3	0.026087	11	0.0103872
TLN2	3	0.026087	14	0.01322
TLR3	3	0.026087	7	0.00661001
TMC5	3	0.026087	9	0.00849858
TMC8	3	0.026087	5	0.00472144
TMEM102	3	0.026087	5	0.00472144
TMEM132A	3	0.026087	3	0.00283286
TMEM132D	3	0.026087	35	0.03305
TMEM143	3	0.026087	1	0.000944287
TMEM52	3	0.026087	3	0.00283286
TMEM92	3	0.026087	1	0.000944287
TMPRSS6	3	0.026087	13	0.0122757
TNFAIP2	3	0.026087	2	0.00188857
TNFRSF11B	3	0.026087	7	0.00661001
TNFRSF18	3	0.026087	2	0.00188857
TNFRSF1A	3	0.026087	1	0.000944287
TNFSF8	3	0.026087	3	0.00283286
TNIK	3	0.026087	7	0.00661001
TNN	3	0.026087	11	0.0103872
TOGARAM1	3	0.026087	3	0.00283286
TP53BP1	3	0.026087	5	0.00472144
TP53BP2	3	0.026087	4	0.00377715
TP63	3	0.026087	12	0.0113314
TPO	3	0.026087	19	0.0179415
TPR	3	0.026087	5	0.00472144
TPTE2	3	0.026087	19	0.0179415
TRAF3	3	0.026087	2	0.00188857
TRAPPC8	3	0.026087	8	0.0075543
TRIM2	3	0.026087	5	0.00472144
TRIM28	3	0.026087	3	0.00283286
TRIM42	3	0.026087	9	0.00849858
TRIM50	3	0.026087	5	0.00472144
TRIM58	3	0.026087	7	0.00661001
TRIOBP	3	0.026087	13	0.0122757
TRMT1	3	0.026087	4	0.00377715
TROAP	3	0.026087	3	0.00283286
TRPC4	3	0.026087	6	0.00566572
TRPS1	3	0.026087	6	0.00566572
TRPV5	3	0.026087	18	0.0169972
TRPV6	3	0.026087	14	0.01322
TSHZ1	3	0.026087	6	0.00566572
TSHZ3	3	0.026087	9	0.00849858
TSPEAR	3	0.026087	13	0.0122757
TTBK1	3	0.026087	5	0.00472144
TTBK2	3	0.026087	8	0.0075543
TTC39B	3	0.026087	2	0.00188857
TTLL4	3	0.026087	5	0.00472144
TUBA3D	3	0.026087	6	0.00566572
TUBA4A	3	0.026087	2	0.00188857
TUBGCP2	3	0.026087	0	0
TULP1	3	0.026087	3	0.00283286
TULP4	3	0.026087	8	0.0075543
TUT1	3	0.026087	3	0.00283286
TUT4	3	0.026087	6	0.00566572
TXNDC16	3	0.026087	1	0.000944287
TYK2	3	0.026087	7	0.00661001
TYRO3	3	0.026087	7	0.00661001
UBA7	3	0.026087	6	0.00566572
UBOX5	3	0.026087	0	0
UBQLNL	3	0.026087	2	0.00188857
UBR2	3	0.026087	5	0.00472144
UBR3	3	0.026087	3	0.00283286
UGGT1	3	0.026087	12	0.0113314
UGT2B11	3	0.026087	10	0.00944287
UMODL1	3	0.026087	16	0.0151086
UNC13D	3	0.026087	5	0.00472144
UNC45A	3	0.026087	7	0.00661001
UNC45B	3	0.026087	11	0.0103872
UNC79	3	0.026087	19	0.0179415
URB1	3	0.026087	3	0.00283286
URB2	3	0.026087	5	0.00472144
USP31	3	0.026087	1	0.000944287
USP34	3	0.026087	4	0.00377715
USP50	3	0.026087	3	0.00283286
USP7	3	0.026087	3	0.00283286
UTRN	3	0.026087	7	0.00661001
VARS2	3	0.026087	3	0.00283286
VAV1	3	0.026087	20	0.0188857
VDR	3	0.026087	3	0.00283286
VEGFC	3	0.026087	4	0.00377715
VEPH1	3	0.026087	2	0.00188857
VEZT	3	0.026087	3	0.00283286
VIPR1	3	0.026087	4	0.00377715
VSIG4	3	0.026087	1	0.000944287
VWA3A	3	0.026087	7	0.00661001
WDR1	3	0.026087	1	0.000944287
WDR13	3	0.026087	3	0.00283286
WDR19	3	0.026087	8	0.0075543
WDR25	3	0.026087	2	0.00188857
WDR45	3	0.026087	2	0.00188857
WDR90	3	0.026087	11	0.0103872
WFS1	3	0.026087	5	0.00472144
WNK2	3	0.026087	17	0.0160529
WNK3	3	0.026087	13	0.0122757
WNT7B	3	0.026087	3	0.00283286
XPO5	3	0.026087	6	0.00566572
XPOT	3	0.026087	3	0.00283286
YES1	3	0.026087	2	0.00188857
YTHDF2	3	0.026087	4	0.00377715
YY2	3	0.026087	6	0.00566572
ZBTB46	3	0.026087	2	0.00188857
ZBTB49	3	0.026087	0	0
ZC3H10	3	0.026087	1	0.000944287
ZC3H4	3	0.026087	6	0.00566572
ZC3H6	3	0.026087	1	0.000944287
ZCCHC2	3	0.026087	5	0.00472144
ZDBF2	3	0.026087	19	0.0179415
ZDHHC16	3	0.026087	2	0.00188857
ZDHHC20	3	0.026087	1	0.000944287
ZFHX4	3	0.026087	11	0.0103872
ZFP91	3	0.026087	3	0.00283286
ZFYVE16	3	0.026087	5	0.00472144
ZMYM4	3	0.026087	4	0.00377715
ZNF140	3	0.026087	2	0.00188857
ZNF155	3	0.026087	3	0.00283286
ZNF185	3	0.026087	1	0.000944287
ZNF251	3	0.026087	0	0
ZNF254	3	0.026087	6	0.00566572
ZNF257	3	0.026087	6	0.00566572
ZNF267	3	0.026087	3	0.00283286
ZNF292	3	0.026087	12	0.0113314
ZNF335	3	0.026087	13	0.0122757
ZNF343	3	0.026087	1	0.000944287
ZNF423	3	0.026087	5	0.00472144
ZNF425	3	0.026087	6	0.00566572
ZNF462	3	0.026087	18	0.0169972
ZNF536	3	0.026087	11	0.0103872
ZNF544	3	0.026087	4	0.00377715
ZNF569	3	0.026087	9	0.00849858
ZNF573	3	0.026087	0	0
ZNF596	3	0.026087	1	0.000944287
ZNF608	3	0.026087	11	0.0103872
ZNF611	3	0.026087	3	0.00283286
ZNF618	3	0.026087	12	0.0113314
ZNF649	3	0.026087	4	0.00377715
ZNF674	3	0.026087	3	0.00283286
ZNF681	3	0.026087	7	0.00661001
ZNF708	3	0.026087	2	0.00188857
ZNF710	3	0.026087	1	0.000944287
ZNF737	3	0.026087	2	0.00188857
ZNF74	3	0.026087	4	0.00377715
ZNF765	3	0.026087	1	0.000944287
ZNF780B	3	0.026087	6	0.00566572
ZNF786	3	0.026087	3	0.00283286
ZNF793	3	0.026087	1	0.000944287
ZNF81	3	0.026087	5	0.00472144
ZNF844	3	0.026087	9	0.00849858
ZNF93	3	0.026087	2	0.00188857
ZP4	3	0.026087	11	0.0103872
ZPBP2	3	0.026087	3	0.00283286
A1BG	2	0.0173913	5	0.00472144
A1CF	2	0.0173913	5	0.00472144
A2M	2	0.0173913	8	0.0075543
A3GALT2	2	0.0173913	3	0.00283286
A4GALT	2	0.0173913	3	0.00283286
AARS2	2	0.0173913	3	0.00283286
AASDH	2	0.0173913	3	0.00283286
AASS	2	0.0173913	11	0.0103872
AATK	2	0.0173913	3	0.00283286
ABAT	2	0.0173913	1	0.000944287
ABCA2	2	0.0173913	12	0.0113314
ABCA3	2	0.0173913	14	0.01322
ABCB10	2	0.0173913	3	0.00283286
ABCB5	2	0.0173913	14	0.01322
ABCB8	2	0.0173913	6	0.00566572
ABCC2	2	0.0173913	7	0.00661001
ABCC3	2	0.0173913	8	0.0075543
ABCC4	2	0.0173913	9	0.00849858
ABCC6	2	0.0173913	5	0.00472144
ABCC8	2	0.0173913	10	0.00944287
ABCD1	2	0.0173913	10	0.00944287
ABCD4	2	0.0173913	4	0.00377715
ABCE1	2	0.0173913	3	0.00283286
ABCF3	2	0.0173913	4	0.00377715
ABCG1	2	0.0173913	8	0.0075543
ABHD1	2	0.0173913	0	0
ABHD14A	2	0.0173913	4	0.00377715
ABHD14B	2	0.0173913	0	0
ABHD16B	2	0.0173913	2	0.00188857
ABL1	2	0.0173913	5	0.00472144
ABRA	2	0.0173913	3	0.00283286
ABTB2	2	0.0173913	0	0
AC018470.1	2	0.0173913	0	0
AC018867.2	2	0.0173913	0	0
AC069368.3	2	0.0173913	2	0.00188857
AC103809.2	2	0.0173913	2	0.00188857
ACAA1	2	0.0173913	1	0.000944287
ACACB	2	0.0173913	17	0.0160529
ACAD10	2	0.0173913	10	0.00944287
ACAD11	2	0.0173913	6	0.00566572
ACADS	2	0.0173913	6	0.00566572
ACAP1	2	0.0173913	3	0.00283286
ACAP3	2	0.0173913	1	0.000944287
ACAT1	2	0.0173913	1	0.000944287
ACE	2	0.0173913	19	0.0179415
ACKR3	2	0.0173913	1	0.000944287
ACLY	2	0.0173913	4	0.00377715
ACOD1	2	0.0173913	0	0
ACOT11	2	0.0173913	3	0.00283286
ACOT12	2	0.0173913	4	0.00377715
ACOT7	2	0.0173913	1	0.000944287
ACOT8	2	0.0173913	0	0
ACOT9	2	0.0173913	2	0.00188857
ACOX1	2	0.0173913	3	0.00283286
ACP2	2	0.0173913	2	0.00188857
ACP6	2	0.0173913	6	0.00566572
ACSF3	2	0.0173913	1	0.000944287
ACSL1	2	0.0173913	6	0.00566572
ACSM3	2	0.0173913	4	0.00377715
ACSM4	2	0.0173913	13	0.0122757
ACSM5	2	0.0173913	9	0.00849858
ACSM6	2	0.0173913	4	0.00377715
ACSS1	2	0.0173913	2	0.00188857
ACSS2	2	0.0173913	5	0.00472144
ACTL7B	2	0.0173913	9	0.00849858
ACTL8	2	0.0173913	4	0.00377715
ACTN1	2	0.0173913	9	0.00849858
ACTN2	2	0.0173913	2	0.00188857
ACTN4	2	0.0173913	8	0.0075543
ACTR1A	2	0.0173913	0	0
ACTR1B	2	0.0173913	2	0.00188857
ACTR6	2	0.0173913	1	0.000944287
ACTRT1	2	0.0173913	6	0.00566572
ACVR1	2	0.0173913	22	0.0207743
ACVR1B	2	0.0173913	1	0.000944287
ACVR2B	2	0.0173913	5	0.00472144
ACY3	2	0.0173913	3	0.00283286
ADAD1	2	0.0173913	2	0.00188857
ADAD2	2	0.0173913	2	0.00188857
ADAM11	2	0.0173913	1	0.000944287
ADAM19	2	0.0173913	8	0.0075543
ADAM2	2	0.0173913	8	0.0075543
ADAM21	2	0.0173913	7	0.00661001
ADAM22	2	0.0173913	10	0.00944287
ADAM30	2	0.0173913	5	0.00472144
ADAM32	2	0.0173913	5	0.00472144
ADAM7	2	0.0173913	15	0.0141643
ADAMTS1	2	0.0173913	5	0.00472144
ADAMTS10	2	0.0173913	12	0.0113314
ADAMTS12	2	0.0173913	36	0.0339943
ADAMTS14	2	0.0173913	12	0.0113314
ADAMTS16	2	0.0173913	22	0.0207743
ADAMTS17	2	0.0173913	9	0.00849858
ADAMTS20	2	0.0173913	13	0.0122757
ADAMTS6	2	0.0173913	6	0.00566572
ADAMTS7	2	0.0173913	13	0.0122757
ADAMTSL1	2	0.0173913	11	0.0103872
ADAP1	2	0.0173913	1	0.000944287
ADAR	2	0.0173913	2	0.00188857
ADARB1	2	0.0173913	1	0.000944287
ADAT3	2	0.0173913	1	0.000944287
ADCK1	2	0.0173913	3	0.00283286
ADCY1	2	0.0173913	12	0.0113314
ADCY10	2	0.0173913	8	0.0075543
ADCY5	2	0.0173913	18	0.0169972
ADD1	2	0.0173913	5	0.00472144
ADGB	2	0.0173913	4	0.00377715
ADGRA1	2	0.0173913	1	0.000944287
ADGRA3	2	0.0173913	3	0.00283286
ADGRB2	2	0.0173913	5	0.00472144
ADGRB3	2	0.0173913	8	0.0075543
ADGRD1	2	0.0173913	13	0.0122757
ADGRE1	2	0.0173913	9	0.00849858
ADGRE2	2	0.0173913	6	0.00566572
ADGRF3	2	0.0173913	4	0.00377715
ADGRG5	2	0.0173913	5	0.00472144
ADGRL1	2	0.0173913	7	0.00661001
ADGRL2	2	0.0173913	6	0.00566572
ADGRL4	2	0.0173913	9	0.00849858
ADM2	2	0.0173913	1	0.000944287
ADNP	2	0.0173913	2	0.00188857
ADORA3	2	0.0173913	1	0.000944287
ADPRHL2	2	0.0173913	1	0.000944287
ADSL	2	0.0173913	4	0.00377715
AEBP2	2	0.0173913	0	0
AFAP1	2	0.0173913	8	0.0075543
AFAP1L1	2	0.0173913	5	0.00472144
AFF1	2	0.0173913	3	0.00283286
AFF2	2	0.0173913	22	0.0207743
AFF3	2	0.0173913	5	0.00472144
AFG3L2	2	0.0173913	5	0.00472144
AFTPH	2	0.0173913	1	0.000944287
AGA	2	0.0173913	3	0.00283286
AGAP1	2	0.0173913	6	0.00566572
AGAP10	2	0.0173913	2	0.00188857
AGBL1	2	0.0173913	4	0.00377715
AGBL2	2	0.0173913	3	0.00283286
AGBL3	2	0.0173913	2	0.00188857
AGFG1	2	0.0173913	3	0.00283286
AGFG2	2	0.0173913	3	0.00283286
AGGF1	2	0.0173913	2	0.00188857
AGPAT4	2	0.0173913	3	0.00283286
AGPS	2	0.0173913	2	0.00188857
AGTRAP	2	0.0173913	1	0.000944287
AGXT2	2	0.0173913	7	0.00661001
AHCTF1	2	0.0173913	7	0.00661001
AHCY	2	0.0173913	4	0.00377715
AHCYL1	2	0.0173913	5	0.00472144
AHDC1	2	0.0173913	4	0.00377715
AHI1	2	0.0173913	2	0.00188857
AHNAK2	2	0.0173913	59	0.0557129
AHR	2	0.0173913	9	0.00849858
AICDA	2	0.0173913	7	0.00661001
AIG1	2	0.0173913	0	0
AIM2	2	0.0173913	3	0.00283286
AIMP1	2	0.0173913	2	0.00188857
AIPL1	2	0.0173913	5	0.00472144
AIRE	2	0.0173913	1	0.000944287
AJAP1	2	0.0173913	3	0.00283286
AJM1	2	0.0173913	2	0.00188857
AK7	2	0.0173913	9	0.00849858
AKAP12	2	0.0173913	2	0.00188857
AKAP13	2	0.0173913	20	0.0188857
AKAP14	2	0.0173913	1	0.000944287
AKAP3	2	0.0173913	4	0.00377715
AKAP5	2	0.0173913	2	0.00188857
AKAP6	2	0.0173913	12	0.0113314
AKAP9	2	0.0173913	13	0.0122757
AKNA	2	0.0173913	8	0.0075543
AKR1C2	2	0.0173913	26	0.0245515
AKT1	2	0.0173913	3	0.00283286
AKT3	2	0.0173913	1	0.000944287
ALAS1	2	0.0173913	1	0.000944287
ALAS2	2	0.0173913	0	0
ALDH16A1	2	0.0173913	2	0.00188857
ALDH18A1	2	0.0173913	3	0.00283286
ALDH1B1	2	0.0173913	1	0.000944287
ALDH1L2	2	0.0173913	5	0.00472144
ALDH3A1	2	0.0173913	8	0.0075543
ALG1	2	0.0173913	4	0.00377715
ALG13	2	0.0173913	4	0.00377715
ALG8	2	0.0173913	2	0.00188857
ALKBH4	2	0.0173913	0	0
ALKBH8	2	0.0173913	0	0
ALMS1	2	0.0173913	16	0.0151086
ALOX12	2	0.0173913	2	0.00188857
ALOX12B	2	0.0173913	3	0.00283286
ALPK1	2	0.0173913	10	0.00944287
ALPK2	2	0.0173913	15	0.0141643
ALPK3	2	0.0173913	12	0.0113314
ALPL	2	0.0173913	1	0.000944287
ALS2	2	0.0173913	7	0.00661001
ALX4	2	0.0173913	2	0.00188857
ALYREF	2	0.0173913	1	0.000944287
AMELX	2	0.0173913	5	0.00472144
AMER2	2	0.0173913	4	0.00377715
AMER3	2	0.0173913	14	0.01322
AMH	2	0.0173913	0	0
AMIGO2	2	0.0173913	2	0.00188857
AMIGO3	2	0.0173913	2	0.00188857
AMN1	2	0.0173913	2	0.00188857
AMOTL1	2	0.0173913	3	0.00283286
AMPD3	2	0.0173913	5	0.00472144
AMPH	2	0.0173913	7	0.00661001
ANAPC1	2	0.0173913	13	0.0122757
ANAPC2	2	0.0173913	4	0.00377715
ANAPC7	2	0.0173913	3	0.00283286
ANGPTL1	2	0.0173913	5	0.00472144
ANGPTL7	2	0.0173913	0	0
ANGPTL8	2	0.0173913	1	0.000944287
ANHX	2	0.0173913	2	0.00188857
ANKAR	2	0.0173913	5	0.00472144
ANKDD1A	2	0.0173913	3	0.00283286
ANKEF1	2	0.0173913	7	0.00661001
ANKH	2	0.0173913	0	0
ANKHD1	2	0.0173913	7	0.00661001
ANKHD1-EIF4EBP3	2	0.0173913	7	0.00661001
ANKIB1	2	0.0173913	5	0.00472144
ANKLE1	2	0.0173913	1	0.000944287
ANKMY1	2	0.0173913	4	0.00377715
ANKRD1	2	0.0173913	0	0
ANKRD11	2	0.0173913	11	0.0103872
ANKRD13D	2	0.0173913	2	0.00188857
ANKRD17	2	0.0173913	11	0.0103872
ANKRD18B	2	0.0173913	2	0.00188857
ANKRD23	2	0.0173913	2	0.00188857
ANKRD24	2	0.0173913	4	0.00377715
ANKRD30B	2	0.0173913	19	0.0179415
ANKRD31	2	0.0173913	3	0.00283286
ANKRD33	2	0.0173913	10	0.00944287
ANKRD34C	2	0.0173913	0	0
ANKRD44	2	0.0173913	0	0
ANKRD45	2	0.0173913	0	0
ANKRD50	2	0.0173913	10	0.00944287
ANKRD6	2	0.0173913	5	0.00472144
ANKRD60	2	0.0173913	0	0
ANKRD7	2	0.0173913	0	0
ANKS6	2	0.0173913	6	0.00566572
ANKUB1	2	0.0173913	1	0.000944287
ANLN	2	0.0173913	6	0.00566572
ANO1	2	0.0173913	10	0.00944287
ANO2	2	0.0173913	14	0.01322
ANO6	2	0.0173913	4	0.00377715
ANO8	2	0.0173913	5	0.00472144
ANO9	2	0.0173913	7	0.00661001
ANOS1	2	0.0173913	3	0.00283286
ANP32B	2	0.0173913	1	0.000944287
ANP32E	2	0.0173913	4	0.00377715
ANTXR1	2	0.0173913	1	0.000944287
ANXA2R	2	0.0173913	4	0.00377715
ANXA7	2	0.0173913	4	0.00377715
AOC2	2	0.0173913	4	0.00377715
AP000304.12	2	0.0173913	1	0.000944287
AP1B1	2	0.0173913	4	0.00377715
AP1S3	2	0.0173913	0	0
AP2A1	2	0.0173913	2	0.00188857
AP2A2	2	0.0173913	3	0.00283286
AP3B2	2	0.0173913	4	0.00377715
AP3S2	2	0.0173913	0	0
AP4B1	2	0.0173913	5	0.00472144
AP4E1	2	0.0173913	3	0.00283286
AP5B1	2	0.0173913	4	0.00377715
AP5Z1	2	0.0173913	2	0.00188857
APAF1	2	0.0173913	3	0.00283286
APBA1	2	0.0173913	10	0.00944287
APBA2	2	0.0173913	4	0.00377715
APBB3	2	0.0173913	2	0.00188857
APCDD1	2	0.0173913	3	0.00283286
APEX1	2	0.0173913	1	0.000944287
APEX2	2	0.0173913	3	0.00283286
APLP1	2	0.0173913	6	0.00566572
APMAP	2	0.0173913	1	0.000944287
APOA4	2	0.0173913	4	0.00377715
APOA5	2	0.0173913	3	0.00283286
APOC4	2	0.0173913	0	0
APP	2	0.0173913	4	0.00377715
APPL1	2	0.0173913	5	0.00472144
APPL2	2	0.0173913	2	0.00188857
APRT	2	0.0173913	0	0
AQP1	2	0.0173913	7	0.00661001
AQP4	2	0.0173913	2	0.00188857
AQP9	2	0.0173913	3	0.00283286
ARAP1	2	0.0173913	5	0.00472144
ARAP3	2	0.0173913	10	0.00944287
ARF5	2	0.0173913	1	0.000944287
ARFGAP3	2	0.0173913	2	0.00188857
ARFGEF3	2	0.0173913	17	0.0160529
ARGLU1	2	0.0173913	2	0.00188857
ARHGAP10	2	0.0173913	6	0.00566572
ARHGAP23	2	0.0173913	3	0.00283286
ARHGAP24	2	0.0173913	2	0.00188857
ARHGAP25	2	0.0173913	5	0.00472144
ARHGAP28	2	0.0173913	4	0.00377715
ARHGAP31	2	0.0173913	9	0.00849858
ARHGAP35	2	0.0173913	8	0.0075543
ARHGAP36	2	0.0173913	4	0.00377715
ARHGAP4	2	0.0173913	5	0.00472144
ARHGAP44	2	0.0173913	10	0.00944287
ARHGAP45	2	0.0173913	8	0.0075543
[truncated: 7,888 more rows]

## Sheet: Table S2
Table S2. Promoter mutation frequency in IDH1-mutant or -wildtype astrocytoma patients.
Gene Name	IDH1-mutant Patient count	IDH1-mutant Patient ratio (out of 115)	IDH1-WT Patient count	IDH1-WT Patient ratio (out of 614)
MMP26	3	0.026087	66	0.107492
HBG2	5	0.0434783	63	0.102606
HBE1	2	0.0173913	34	0.0553746
OR2L13	2	0.0173913	29	0.0472313
KATNAL2	4	0.0347826	22	0.0358306
CD36	1	0.00869565	22	0.0358306
ZNF512B	3	0.026087	14	0.0228013
PTPRD	1	0.00869565	12	0.019544
SPRN	4	0.0347826	11	0.0179153
OR2W3	3	0.026087	10	0.0162866
FLJ00418	1	0.00869565	9	0.014658
HOXD3	3	0.026087	7	0.0114007
C1QTNF5	2	0.0173913	7	0.0114007
PRSS50	2	0.0173913	7	0.0114007
SERP1	4	0.0347826	6	0.00977199
ABHD14B	2	0.0173913	6	0.00977199
IL4I1	2	0.0173913	6	0.00977199
NRL	2	0.0173913	6	0.00977199
P2RY12	3	0.026087	5	0.00814332
BORCS8-MEF2B	2	0.0173913	5	0.00814332
HTR5A-AS1	2	0.0173913	5	0.00814332
MEF2B	2	0.0173913	5	0.00814332
C10orf55	1	0.00869565	5	0.00814332
GNB1L	1	0.00869565	5	0.00814332
MOB3B	1	0.00869565	5	0.00814332
PCED1B	1	0.00869565	5	0.00814332
TPTE	1	0.00869565	5	0.00814332
ZNF331	1	0.00869565	5	0.00814332
CALD1	2	0.0173913	4	0.00651466
HYPK	2	0.0173913	4	0.00651466
KCNJ16	2	0.0173913	4	0.00651466
RPL36	2	0.0173913	4	0.00651466
CDH6	1	0.00869565	4	0.00651466
NRCAM	1	0.00869565	4	0.00651466
PEG10	1	0.00869565	4	0.00651466
S100A13	1	0.00869565	4	0.00651466
TSPAN8	1	0.00869565	4	0.00651466
CHORDC1	3	0.026087	3	0.00488599
C9orf139	2	0.0173913	3	0.00488599
GATA1	2	0.0173913	3	0.00488599
LCE3D	2	0.0173913	3	0.00488599
LOXHD1	2	0.0173913	3	0.00488599
PLCL2	2	0.0173913	3	0.00488599
PTRH1	2	0.0173913	3	0.00488599
RASSF2	2	0.0173913	3	0.00488599
RP11-155D18.14	2	0.0173913	3	0.00488599
SCAMP4	2	0.0173913	3	0.00488599
SLC1A5	2	0.0173913	3	0.00488599
SOGA3	2	0.0173913	3	0.00488599
TFEB	2	0.0173913	3	0.00488599
TXNRD3NB	2	0.0173913	3	0.00488599
VIP	2	0.0173913	3	0.00488599
C3orf67	1	0.00869565	3	0.00488599
CUZD1	1	0.00869565	3	0.00488599
DHX32	1	0.00869565	3	0.00488599
FAM217B	1	0.00869565	3	0.00488599
HIVEP2	1	0.00869565	3	0.00488599
HOXD4	1	0.00869565	3	0.00488599
MYLK	1	0.00869565	3	0.00488599
NXPE1	1	0.00869565	3	0.00488599
PLEKHG1	1	0.00869565	3	0.00488599
SUPT3H	1	0.00869565	3	0.00488599
WFIKKN2	1	0.00869565	3	0.00488599
ADCYAP1	2	0.0173913	2	0.00325733
ARF5	2	0.0173913	2	0.00325733
ASAH2B	2	0.0173913	2	0.00325733
CCDC157	2	0.0173913	2	0.00325733
CDC42SE1	2	0.0173913	2	0.00325733
CELF2	2	0.0173913	2	0.00325733
DISP1	2	0.0173913	2	0.00325733
DKC1	2	0.0173913	2	0.00325733
FAM111A	2	0.0173913	2	0.00325733
GABARAP	2	0.0173913	2	0.00325733
GDF5OS	2	0.0173913	2	0.00325733
GTF2E2	2	0.0173913	2	0.00325733
HIF1AN	2	0.0173913	2	0.00325733
HYAL3	2	0.0173913	2	0.00325733
KCTD15	2	0.0173913	2	0.00325733
LDB3	2	0.0173913	2	0.00325733
LDOC1	2	0.0173913	2	0.00325733
LYG1	2	0.0173913	2	0.00325733
MCRIP1	2	0.0173913	2	0.00325733
MPEG1	2	0.0173913	2	0.00325733
MUSTN1	2	0.0173913	2	0.00325733
NCOA5	2	0.0173913	2	0.00325733
OCRL	2	0.0173913	2	0.00325733
OGN	2	0.0173913	2	0.00325733
POC1B-GALNT4	2	0.0173913	2	0.00325733
PRXL2A	2	0.0173913	2	0.00325733
R3HDM1	2	0.0173913	2	0.00325733
RFTN1	2	0.0173913	2	0.00325733
SP140	2	0.0173913	2	0.00325733
TOX4	2	0.0173913	2	0.00325733
TSGA10	2	0.0173913	2	0.00325733
TSPAN10	2	0.0173913	2	0.00325733
TTC29	2	0.0173913	2	0.00325733
UGT1A4	2	0.0173913	2	0.00325733
VEZT	2	0.0173913	2	0.00325733
ZGLP1	2	0.0173913	2	0.00325733
ZNF691	2	0.0173913	2	0.00325733
ADIPOR2	1	0.00869565	2	0.00325733
ATP5F1EP2	1	0.00869565	2	0.00325733
ATP6V0A4	1	0.00869565	2	0.00325733
BIN2	1	0.00869565	2	0.00325733
C14orf132	1	0.00869565	2	0.00325733
ESX1	1	0.00869565	2	0.00325733
FSCB	1	0.00869565	2	0.00325733
KCTD1	1	0.00869565	2	0.00325733
MOB1B	1	0.00869565	2	0.00325733
MRTFA	1	0.00869565	2	0.00325733
MYH1	1	0.00869565	2	0.00325733
PTCRA	1	0.00869565	2	0.00325733
SCYL3	1	0.00869565	2	0.00325733
SLC38A1	1	0.00869565	2	0.00325733
SLC4A2	1	0.00869565	2	0.00325733
TMC5	1	0.00869565	2	0.00325733
UBOX5	1	0.00869565	2	0.00325733
ZNF121	1	0.00869565	2	0.00325733
ZNF540	1	0.00869565	2	0.00325733
AC015987.2	1	0.00869565	1	0.00162866
ACOT7	1	0.00869565	1	0.00162866
ADAMTS10	1	0.00869565	1	0.00162866
ANGPTL5	1	0.00869565	1	0.00162866
ARL16	1	0.00869565	1	0.00162866
ARL9	1	0.00869565	1	0.00162866
ATP5MGL	1	0.00869565	1	0.00162866
BAALC-AS2	1	0.00869565	1	0.00162866
BMPR2	1	0.00869565	1	0.00162866
CCDC167	1	0.00869565	1	0.00162866
CCDC54	1	0.00869565	1	0.00162866
CCL14	1	0.00869565	1	0.00162866
CD300A	1	0.00869565	1	0.00162866
CD5L	1	0.00869565	1	0.00162866
CLIC2	1	0.00869565	1	0.00162866
CYP19A1	1	0.00869565	1	0.00162866
DSG1	1	0.00869565	1	0.00162866
EMP1	1	0.00869565	1	0.00162866
FBXW7	1	0.00869565	1	0.00162866
FERMT2	1	0.00869565	1	0.00162866
FLVCR2	1	0.00869565	1	0.00162866
G0S2	1	0.00869565	1	0.00162866
GIGYF1	1	0.00869565	1	0.00162866
GPR87	1	0.00869565	1	0.00162866
HACL1	1	0.00869565	1	0.00162866
HSD11B1	1	0.00869565	1	0.00162866
INO80E	1	0.00869565	1	0.00162866
ITIH2	1	0.00869565	1	0.00162866
IZUMO1	1	0.00869565	1	0.00162866
KCNAB1	1	0.00869565	1	0.00162866
KIF25	1	0.00869565	1	0.00162866
LARS	1	0.00869565	1	0.00162866
LRMP	1	0.00869565	1	0.00162866
MAP2	1	0.00869565	1	0.00162866
METAP1D	1	0.00869565	1	0.00162866
MGAT4B	1	0.00869565	1	0.00162866
MINOS1-NBL1	1	0.00869565	1	0.00162866
MRPL57	1	0.00869565	1	0.00162866
MRPS21	1	0.00869565	1	0.00162866
MS4A10	1	0.00869565	1	0.00162866
MYNN	1	0.00869565	1	0.00162866
MYO16	1	0.00869565	1	0.00162866
NDUFB1	1	0.00869565	1	0.00162866
NPAT	1	0.00869565	1	0.00162866
NPRL3	1	0.00869565	1	0.00162866
NT5C2	1	0.00869565	1	0.00162866
NTRK2	1	0.00869565	1	0.00162866
PIM1	1	0.00869565	1	0.00162866
PLCXD1	1	0.00869565	1	0.00162866
POM121C	1	0.00869565	1	0.00162866
POU6F2	1	0.00869565	1	0.00162866
PPIH	1	0.00869565	1	0.00162866
PPP2R1B	1	0.00869565	1	0.00162866
PTH	1	0.00869565	1	0.00162866
RAB3C	1	0.00869565	1	0.00162866
RAB8A	1	0.00869565	1	0.00162866
RAP2B	1	0.00869565	1	0.00162866
RBM44	1	0.00869565	1	0.00162866
RLN1	1	0.00869565	1	0.00162866
RNASE4	1	0.00869565	1	0.00162866
RPS4Y1	1	0.00869565	1	0.00162866
SERPINA1	1	0.00869565	1	0.00162866
SIAH1	1	0.00869565	1	0.00162866
STON2	1	0.00869565	1	0.00162866
SYT11	1	0.00869565	1	0.00162866
TCP1	1	0.00869565	1	0.00162866
THRA	1	0.00869565	1	0.00162866
THYN1	1	0.00869565	1	0.00162866
TLR7	1	0.00869565	1	0.00162866
TMEM167B	1	0.00869565	1	0.00162866
TMEM192	1	0.00869565	1	0.00162866
TMEM213	1	0.00869565	1	0.00162866
TRA2B	1	0.00869565	1	0.00162866
TSPAN1	1	0.00869565	1	0.00162866
TYMP	1	0.00869565	1	0.00162866
ULK4	1	0.00869565	1	0.00162866
USP21	1	0.00869565	1	0.00162866
USP51	1	0.00869565	1	0.00162866
WDR19	1	0.00869565	1	0.00162866
WDR83OS	1	0.00869565	1	0.00162866
WTAP	1	0.00869565	1	0.00162866
ZKSCAN5	1	0.00869565	1	0.00162866
ZNF205	1	0.00869565	1	0.00162866
ZNF468	1	0.00869565	1	0.00162866
ZNF470	1	0.00869565	1	0.00162866

## Sheet: Table S3
Table S3. Terminator mutation frequency in IDH1-mutant or -wildtype astrocytoma patients.
Gene Name	IDH1-mutant Patient count	IDH1-mutant Patient ratio (out of 115)	IDH1-WT Patient count	IDH1-WT Patient ratio (out of 582)
MSH6	3	0.026087	8	0.0137457
DDI2	3	0.026087	3	0.00515464
PDHA1	3	0.026087	3	0.00515464
ARHGAP19-SLIT1	2	0.0173913	13	0.0223368
MUC19	2	0.0173913	12	0.0206186
LRRC14	2	0.0173913	10	0.0171821
C17orf107	2	0.0173913	8	0.0137457
CNNM2	2	0.0173913	8	0.0137457
MED12L	2	0.0173913	8	0.0137457
MTFR1L	2	0.0173913	7	0.0120275
MTHFR	2	0.0173913	7	0.0120275
ZFP41	2	0.0173913	7	0.0120275
ESS2	2	0.0173913	6	0.0103093
AC129492.6	2	0.0173913	5	0.00859107
CENPO	2	0.0173913	5	0.00859107
DNAH10OS	2	0.0173913	5	0.00859107
PPIE	2	0.0173913	5	0.00859107
SZT2	2	0.0173913	5	0.00859107
GAS2L1	2	0.0173913	4	0.00687285
XXcos-LUCA11.5	2	0.0173913	4	0.00687285
CFAP73	2	0.0173913	3	0.00515464
CTD-3214H19.16	2	0.0173913	3	0.00515464
FCGR2C	2	0.0173913	3	0.00515464
NT5C1B-RDH14	2	0.0173913	3	0.00515464
RP11-723O4.6	2	0.0173913	3	0.00515464
SOGA3	2	0.0173913	3	0.00515464
TEX9	2	0.0173913	3	0.00515464
AC174470.1	2	0.0173913	2	0.00343643
AL589765.1	2	0.0173913	2	0.00343643
CD72	2	0.0173913	2	0.00343643
CERS1	2	0.0173913	2	0.00343643
CHMP1A	2	0.0173913	2	0.00343643
FAM47E-STBD1	2	0.0173913	2	0.00343643
INF2	2	0.0173913	2	0.00343643
MYO18A	2	0.0173913	2	0.00343643
NDUFC2-KCTD14	2	0.0173913	2	0.00343643
SLC46A1	2	0.0173913	2	0.00343643
TAS2R16	2	0.0173913	2	0.00343643
TBL3	2	0.0173913	2	0.00343643
TLDC2	2	0.0173913	2	0.00343643
ZNF747	2	0.0173913	2	0.00343643
RP11-383H13.1	1	0.00869565	13	0.0223368
CDK14	1	0.00869565	9	0.0154639
POM121	1	0.00869565	9	0.0154639
PRIM2	1	0.00869565	9	0.0154639
ARIH1	1	0.00869565	8	0.0137457
RSAD2	1	0.00869565	8	0.0137457
ARSJ	1	0.00869565	7	0.0120275
ADAMTS18	1	0.00869565	6	0.0103093
ANTXR1	1	0.00869565	6	0.0103093
DCLK3	1	0.00869565	6	0.0103093
DUSP14	1	0.00869565	6	0.0103093
FOXP2	1	0.00869565	6	0.0103093
GABRA4	1	0.00869565	6	0.0103093
IQGAP1	1	0.00869565	6	0.0103093
MS4A10	1	0.00869565	6	0.0103093
STK32B	1	0.00869565	6	0.0103093
STK35	1	0.00869565	6	0.0103093
XXbac-BPG32J3.20	1	0.00869565	6	0.0103093
FBXO11	1	0.00869565	5	0.00859107
FGF2	1	0.00869565	5	0.00859107
NDE1	1	0.00869565	5	0.00859107
PIGA	1	0.00869565	5	0.00859107
SNTB2	1	0.00869565	5	0.00859107
TMPRSS11A	1	0.00869565	5	0.00859107
ANKRD20A4	1	0.00869565	4	0.00687285
BCL9L	1	0.00869565	4	0.00687285
CNKSR3	1	0.00869565	4	0.00687285
FAM98A	1	0.00869565	4	0.00687285
LDLRAD2	1	0.00869565	4	0.00687285
SH2D4A	1	0.00869565	4	0.00687285
UBE2E2	1	0.00869565	4	0.00687285
BBOF1	1	0.00869565	3	0.00515464
CACNB4	1	0.00869565	3	0.00515464
CAMK2N1	1	0.00869565	3	0.00515464
CEMP1	1	0.00869565	3	0.00515464
CMTM8	1	0.00869565	3	0.00515464
ELF5	1	0.00869565	3	0.00515464
ERCC2	1	0.00869565	3	0.00515464
ERI2	1	0.00869565	3	0.00515464
FMNL3	1	0.00869565	3	0.00515464
HIST1H2BK	1	0.00869565	3	0.00515464
MRPL19	1	0.00869565	3	0.00515464
NFE2L3	1	0.00869565	3	0.00515464
SRPK1	1	0.00869565	3	0.00515464
ADAM29	1	0.00869565	2	0.00343643
ARSG	1	0.00869565	2	0.00343643
ATN1	1	0.00869565	2	0.00343643
ATPAF1	1	0.00869565	2	0.00343643
BTBD7	1	0.00869565	2	0.00343643
C10orf62	1	0.00869565	2	0.00343643
CDCA8	1	0.00869565	2	0.00343643
CENPP	1	0.00869565	2	0.00343643
CHGB	1	0.00869565	2	0.00343643
CLEC14A	1	0.00869565	2	0.00343643
DSTN	1	0.00869565	2	0.00343643
FFAR2	1	0.00869565	2	0.00343643
GLT8D2	1	0.00869565	2	0.00343643
GPATCH3	1	0.00869565	2	0.00343643
KIR2DL3	1	0.00869565	2	0.00343643
LRRFIP1	1	0.00869565	2	0.00343643
LYG2	1	0.00869565	2	0.00343643
PIAS2	1	0.00869565	2	0.00343643
PPP2CA	1	0.00869565	2	0.00343643
RBM28	1	0.00869565	2	0.00343643
RNF144A	1	0.00869565	2	0.00343643
RNF150	1	0.00869565	2	0.00343643
SARDH	1	0.00869565	2	0.00343643
SLC35D2	1	0.00869565	2	0.00343643
SMUG1	1	0.00869565	2	0.00343643
SPATA18	1	0.00869565	2	0.00343643
TMEM155	1	0.00869565	2	0.00343643
TRMT61B	1	0.00869565	2	0.00343643
ZFP30	1	0.00869565	2	0.00343643
ZNF607	1	0.00869565	2	0.00343643
ABCF2	1	0.00869565	1	0.00171821
AC004466.1	1	0.00869565	1	0.00171821
ACP1	1	0.00869565	1	0.00171821
ACVR1B	1	0.00869565	1	0.00171821
AL163636.6	1	0.00869565	1	0.00171821
APOBEC1	1	0.00869565	1	0.00171821
ARG1	1	0.00869565	1	0.00171821
BBX	1	0.00869565	1	0.00171821
BCL7B	1	0.00869565	1	0.00171821
BPIFB2	1	0.00869565	1	0.00171821
C19orf66	1	0.00869565	1	0.00171821
CBLN1	1	0.00869565	1	0.00171821
CDCP2	1	0.00869565	1	0.00171821
CDKN1B	1	0.00869565	1	0.00171821
CKMT2	1	0.00869565	1	0.00171821
CLP1	1	0.00869565	1	0.00171821
COX6B1	1	0.00869565	1	0.00171821
CRYM	1	0.00869565	1	0.00171821
DHRS11	1	0.00869565	1	0.00171821
DHX8	1	0.00869565	1	0.00171821
DNAJA4	1	0.00869565	1	0.00171821
FAM9B	1	0.00869565	1	0.00171821
GAPDHS	1	0.00869565	1	0.00171821
GATB	1	0.00869565	1	0.00171821
GCAT	1	0.00869565	1	0.00171821
GCNA	1	0.00869565	1	0.00171821
GHRL	1	0.00869565	1	0.00171821
GPI	1	0.00869565	1	0.00171821
GPR63	1	0.00869565	1	0.00171821
HOXA11	1	0.00869565	1	0.00171821
ID3	1	0.00869565	1	0.00171821
IL1RAPL1	1	0.00869565	1	0.00171821
ISCA2	1	0.00869565	1	0.00171821
ITGA5	1	0.00869565	1	0.00171821
KCNC2	1	0.00869565	1	0.00171821
KDM5C	1	0.00869565	1	0.00171821
KLHL7	1	0.00869565	1	0.00171821
KLK8	1	0.00869565	1	0.00171821
KMO	1	0.00869565	1	0.00171821
KRTCAP3	1	0.00869565	1	0.00171821
LRRC4C	1	0.00869565	1	0.00171821
MAOB	1	0.00869565	1	0.00171821
MEIS1	1	0.00869565	1	0.00171821
MRPL33	1	0.00869565	1	0.00171821
MTPN	1	0.00869565	1	0.00171821
NRXN2	1	0.00869565	1	0.00171821
PLAT	1	0.00869565	1	0.00171821
PLCH2	1	0.00869565	1	0.00171821
PLOD1	1	0.00869565	1	0.00171821
PODNL1	1	0.00869565	1	0.00171821
POTEH	1	0.00869565	1	0.00171821
PPEF2	1	0.00869565	1	0.00171821
PUM3	1	0.00869565	1	0.00171821
RC3H2	1	0.00869565	1	0.00171821
RECK	1	0.00869565	1	0.00171821
RNF19A	1	0.00869565	1	0.00171821
RPS15	1	0.00869565	1	0.00171821
S100A16	1	0.00869565	1	0.00171821
SLC15A1	1	0.00869565	1	0.00171821
SLC35A2	1	0.00869565	1	0.00171821
SMARCAD1	1	0.00869565	1	0.00171821
SMR3B	1	0.00869565	1	0.00171821
SNRPC	1	0.00869565	1	0.00171821
SPIDR	1	0.00869565	1	0.00171821
SUPT3H	1	0.00869565	1	0.00171821
TAF11	1	0.00869565	1	0.00171821
TRIM40	1	0.00869565	1	0.00171821
TROAP	1	0.00869565	1	0.00171821
ULBP3	1	0.00869565	1	0.00171821
URGCP-MRPS24	1	0.00869565	1	0.00171821
VNN2	1	0.00869565	1	0.00171821
VNN3	1	0.00869565	1	0.00171821
WLS	1	0.00869565	1	0.00171821
WNT9B	1	0.00869565	1	0.00171821
ZBTB16	1	0.00869565	1	0.00171821
ZDHHC23	1	0.00869565	1	0.00171821
ZFPL1	1	0.00869565	1	0.00171821
ZMAT2	1	0.00869565	1	0.00171821
ZNF14	1	0.00869565	1	0.00171821
ZNF471	1	0.00869565	1	0.00171821
ZNF516	1	0.00869565	1	0.00171821
ZNF587	1	0.00869565	1	0.00171821

## Sheet: Table S4
Table S4. Intronic mutation frequency in IDH1-mutant or -wildtype astrocytoma patients.
Gene Name	IDH1-mutant Patient count	IDH1-mutant Patient ratio (out of 115)	IDH1-WT Patient count	IDH1-WT Patient ratio (out of 1005)
PCDHA1	12	0.104348	161	0.160199
PCDHA2	12	0.104348	149	0.148259
PCDHA3	10	0.0869565	132	0.131343
PCDHGA1	10	0.0869565	124	0.123383
PCDHGA2	10	0.0869565	112	0.111443
PCDHGA3	10	0.0869565	110	0.109453
PCDHGA4	10	0.0869565	99	0.0985075
PCDHGA5	10	0.0869565	85	0.0845771
PCDHGA6	10	0.0869565	65	0.0646766
PCDHGA7	10	0.0869565	62	0.0616915
PCDHGB1	10	0.0869565	105	0.104478
PCDHGB2	10	0.0869565	90	0.0895522
PCDHGB3	10	0.0869565	72	0.0716418
PCDHA4	9	0.0782609	125	0.124378
PCDHA5	9	0.0782609	115	0.114428
PCDHA6	9	0.0782609	106	0.105473
PCDHGA8	9	0.0782609	47	0.0467662
PCDHGA9	9	0.0782609	41	0.040796
PCDHGB4	9	0.0782609	54	0.0537313
PCDHGB6	9	0.0782609	37	0.0368159
PCDHA7	8	0.0695652	96	0.0955224
PCDHGA10	8	0.0695652	32	0.0318408
PCDHGB7	8	0.0695652	31	0.0308458
PCDHA8	7	0.0608696	87	0.0865672
PCDHA9	7	0.0608696	71	0.0706468
TSPEAR	7	0.0608696	68	0.0676617
ATRX	6	0.0521739	12	0.0119403
PCDHA10	6	0.0521739	58	0.0577114
PCDHGA11	6	0.0521739	24	0.0238806
LRCH2	5	0.0434783	15	0.0149254
PCDHA11	5	0.0434783	46	0.0457711
PCDHA12	5	0.0434783	33	0.0328358
TP53	5	0.0434783	19	0.0189055
ZIM2	5	0.0434783	21	0.0208955
AC005082.1	4	0.0347826	5	0.00497512
ASTN2	4	0.0347826	11	0.0109453
CACNA2D3	4	0.0347826	14	0.0139303
GAS8	4	0.0347826	7	0.00696517
MACF1	4	0.0347826	19	0.0189055
PCDHGA12	4	0.0347826	19	0.0189055
AC003006.7	3	0.026087	12	0.0119403
AC006538.4	3	0.026087	7	0.00696517
ARHGEF4	3	0.026087	3	0.00298507
C1orf105	3	0.026087	4	0.0039801
C4orf45	3	0.026087	8	0.0079602
CASK	3	0.026087	15	0.0149254
CCNH	3	0.026087	4	0.0039801
CENPP	3	0.026087	9	0.00895522
CHMP3	3	0.026087	6	0.00597015
CNTNAP4	3	0.026087	10	0.00995025
CSMD1	3	0.026087	19	0.0189055
CSMD3	3	0.026087	15	0.0149254
EFCAB13	3	0.026087	6	0.00597015
EYS	3	0.026087	38	0.0378109
FAM120A	3	0.026087	5	0.00497512
HACL1	3	0.026087	4	0.0039801
ITFG3	3	0.026087	5	0.00497512
MARCH10	3	0.026087	6	0.00597015
MBTPS2	3	0.026087	9	0.00895522
MED12L	3	0.026087	22	0.0218905
MUC19	3	0.026087	4	0.0039801
NEB	3	0.026087	7	0.00696517
OBSCN-AS1	3	0.026087	5	0.00497512
OLFM3	3	0.026087	10	0.00995025
PCDHGC3	3	0.026087	15	0.0149254
PI4K2A	3	0.026087	11	0.0109453
RIMS1	3	0.026087	12	0.0119403
RNF103-CHMP3	3	0.026087	6	0.00597015
SLC5A10	3	0.026087	13	0.0129353
TM4SF2	3	0.026087	60	0.0597015
UGT1A10	3	0.026087	28	0.0278607
UGT1A4	3	0.026087	11	0.0109453
UGT1A5	3	0.026087	14	0.0139303
UGT1A6	3	0.026087	17	0.0169154
UGT1A7	3	0.026087	20	0.0199005
UGT1A9	3	0.026087	23	0.0228856
XPNPEP3	3	0.026087	5	0.00497512
A3GALT2	2	0.0173913	2	0.00199005
ABCA12	2	0.0173913	6	0.00597015
ABCA2	2	0.0173913	2	0.00199005
ABCA7	2	0.0173913	5	0.00497512
ABCB1	2	0.0173913	2	0.00199005
ABCB7	2	0.0173913	3	0.00298507
ABHD14A-ACY1	2	0.0173913	5	0.00497512
ABLIM2	2	0.0173913	2	0.00199005
AC002310.13	2	0.0173913	5	0.00497512
AC004076.7	2	0.0173913	6	0.00597015
AC004076.9	2	0.0173913	5	0.00497512
AC006486.9	2	0.0173913	3	0.00298507
AC007040.11	2	0.0173913	11	0.0109453
AC009892.10	2	0.0173913	7	0.00696517
AC011997.1	2	0.0173913	12	0.0119403
AC069368.3	2	0.0173913	6	0.00597015
ACACA	2	0.0173913	5	0.00497512
ACAP3	2	0.0173913	3	0.00298507
ACLY	2	0.0173913	3	0.00298507
ACOT11	2	0.0173913	12	0.0119403
ACOXL	2	0.0173913	5	0.00497512
ACSF2	2	0.0173913	9	0.00895522
ACYP2	2	0.0173913	13	0.0129353
ADA	2	0.0173913	2	0.00199005
ADAMTS16	2	0.0173913	7	0.00696517
ADAMTS9	2	0.0173913	4	0.0039801
ADCK5	2	0.0173913	5	0.00497512
ADCY1	2	0.0173913	5	0.00497512
ADCYAP1R1	2	0.0173913	2	0.00199005
ADGRG7	2	0.0173913	3	0.00298507
ADGRV1	2	0.0173913	11	0.0109453
ADSSL1	2	0.0173913	2	0.00199005
AES	2	0.0173913	2	0.00199005
AF196779.12	2	0.0173913	4	0.0039801
AGA	2	0.0173913	2	0.00199005
AGO2	2	0.0173913	2	0.00199005
AKAP13	2	0.0173913	5	0.00497512
AKAP2	2	0.0173913	13	0.0129353
AKT3	2	0.0173913	7	0.00696517
AL627171.1	2	0.0173913	2	0.00199005
ALAD	2	0.0173913	2	0.00199005
ALB	2	0.0173913	5	0.00497512
ALG5	2	0.0173913	2	0.00199005
AMBN	2	0.0173913	3	0.00298507
AMHR2	2	0.0173913	2	0.00199005
AMPD3	2	0.0173913	2	0.00199005
ANGPT2	2	0.0173913	5	0.00497512
ANK3	2	0.0173913	10	0.00995025
ANKRD13B	2	0.0173913	2	0.00199005
ANKRD17	2	0.0173913	7	0.00696517
ANKRD62	2	0.0173913	2	0.00199005
ANKS1B	2	0.0173913	21	0.0208955
ANP32E	2	0.0173913	2	0.00199005
AP000304.12	2	0.0173913	21	0.0208955
AP000688.1	2	0.0173913	3	0.00298507
AP002884.3	2	0.0173913	4	0.0039801
AP1B1	2	0.0173913	3	0.00298507
AP2B1	2	0.0173913	3	0.00298507
ARCN1	2	0.0173913	2	0.00199005
ARFGAP1	2	0.0173913	2	0.00199005
ARFGEF2	2	0.0173913	3	0.00298507
ARHGAP11A	2	0.0173913	2	0.00199005
ARHGAP36	2	0.0173913	5	0.00497512
ARHGAP6	2	0.0173913	16	0.0159204
ARHGAP8	2	0.0173913	4	0.0039801
ARHGEF26	2	0.0173913	3	0.00298507
ARID1A	2	0.0173913	3	0.00298507
ARID1B	2	0.0173913	5	0.00497512
ARID3B	2	0.0173913	2	0.00199005
ARL5B	2	0.0173913	2	0.00199005
ARMH1	2	0.0173913	3	0.00298507
ARSE	2	0.0173913	2	0.00199005
ASAP3	2	0.0173913	2	0.00199005
ASB3	2	0.0173913	6	0.00597015
ATF7IP	2	0.0173913	4	0.0039801
ATG13	2	0.0173913	2	0.00199005
ATG2A	2	0.0173913	2	0.00199005
ATM	2	0.0173913	7	0.00696517
ATP6V0A1	2	0.0173913	3	0.00298507
ATP6V1A	2	0.0173913	2	0.00199005
ATP6V1C1	2	0.0173913	3	0.00298507
ATP6V1H	2	0.0173913	4	0.0039801
ATPAF1	2	0.0173913	2	0.00199005
B4GALT1	2	0.0173913	2	0.00199005
B4GALT6	2	0.0173913	3	0.00298507
BCCIP	2	0.0173913	8	0.0079602
BCKDHB	2	0.0173913	6	0.00597015
BCL7A	2	0.0173913	2	0.00199005
BCLAF1	2	0.0173913	3	0.00298507
BTG3	2	0.0173913	2	0.00199005
C10orf126	2	0.0173913	2	0.00199005
C12orf56	2	0.0173913	4	0.0039801
C14orf180	2	0.0173913	2	0.00199005
C14orf39	2	0.0173913	2	0.00199005
C1orf147	2	0.0173913	2	0.00199005
C1orf167	2	0.0173913	8	0.0079602
C1orf174	2	0.0173913	2	0.00199005
C3orf49	2	0.0173913	2	0.00199005
C7orf50	2	0.0173913	4	0.0039801
CACNA1A	2	0.0173913	5	0.00497512
CACNA1H	2	0.0173913	2	0.00199005
CAMTA1	2	0.0173913	9	0.00895522
CAPN5	2	0.0173913	3	0.00298507
CAPRIN2	2	0.0173913	2	0.00199005
CARMIL3	2	0.0173913	2	0.00199005
CAST	2	0.0173913	4	0.0039801
CBLIF	2	0.0173913	2	0.00199005
CBLL1	2	0.0173913	3	0.00298507
CBY1	2	0.0173913	2	0.00199005
CC2D2B	2	0.0173913	3	0.00298507
CCDC47	2	0.0173913	2	0.00199005
CCNB1	2	0.0173913	2	0.00199005
CCSER2	2	0.0173913	2	0.00199005
CD101	2	0.0173913	2	0.00199005
CD200	2	0.0173913	2	0.00199005
CD2AP	2	0.0173913	5	0.00497512
CD300LF	2	0.0173913	2	0.00199005
CDC42BPA	2	0.0173913	6	0.00597015
CDK5RAP2	2	0.0173913	2	0.00199005
CDKL5	2	0.0173913	11	0.0109453
CELA2B	2	0.0173913	2	0.00199005
CENPT	2	0.0173913	3	0.00298507
CEP290	2	0.0173913	2	0.00199005
CERKL	2	0.0173913	5	0.00497512
CFAP45	2	0.0173913	2	0.00199005
CHADL	2	0.0173913	2	0.00199005
CHD8	2	0.0173913	4	0.0039801
CHFR	2	0.0173913	2	0.00199005
CHI3L1	2	0.0173913	2	0.00199005
CHL1	2	0.0173913	2	0.00199005
CHRNA1	2	0.0173913	2	0.00199005
CHST13	2	0.0173913	2	0.00199005
CIB4	2	0.0173913	2	0.00199005
CIT	2	0.0173913	4	0.0039801
CKLF-CMTM1	2	0.0173913	3	0.00298507
CLCN3	2	0.0173913	2	0.00199005
CLDND1	2	0.0173913	3	0.00298507
CLEC1B	2	0.0173913	2	0.00199005
CLPTM1L	2	0.0173913	3	0.00298507
CLSTN3	2	0.0173913	5	0.00497512
CNGB1	2	0.0173913	7	0.00696517
CNKSR2	2	0.0173913	6	0.00597015
COG2	2	0.0173913	2	0.00199005
COL18A1	2	0.0173913	4	0.0039801
COL27A1	2	0.0173913	3	0.00298507
COL4A1	2	0.0173913	5	0.00497512
COL5A3	2	0.0173913	3	0.00298507
COL7A1	2	0.0173913	2	0.00199005
COLGALT1	2	0.0173913	2	0.00199005
COPA	2	0.0173913	2	0.00199005
COPE	2	0.0173913	2	0.00199005
CPNE1	2	0.0173913	4	0.0039801
CPNE6	2	0.0173913	2	0.00199005
CRISP3	2	0.0173913	4	0.0039801
CROCC	2	0.0173913	2	0.00199005
CRYBG2	2	0.0173913	2	0.00199005
CSNK1G3	2	0.0173913	3	0.00298507
CSNK2A1	2	0.0173913	3	0.00298507
CST2	2	0.0173913	2	0.00199005
CTB-96E2.2	2	0.0173913	10	0.00995025
CTC1	2	0.0173913	3	0.00298507
CTD-2140B24.4	2	0.0173913	6	0.00597015
CTD-2583A14.10	2	0.0173913	5	0.00497512
CTDP1	2	0.0173913	4	0.0039801
CTIF	2	0.0173913	4	0.0039801
CTNNA1	2	0.0173913	7	0.00696517
CTNNA3	2	0.0173913	20	0.0199005
CTSK	2	0.0173913	2	0.00199005
CUL4B	2	0.0173913	2	0.00199005
CUL7	2	0.0173913	2	0.00199005
CUL9	2	0.0173913	3	0.00298507
CUX2	2	0.0173913	7	0.00696517
CXXC1	2	0.0173913	2	0.00199005
CYP3A5	2	0.0173913	2	0.00199005
DBF4	2	0.0173913	3	0.00298507
DCAF11	2	0.0173913	3	0.00298507
DCAF7	2	0.0173913	10	0.00995025
DCLK1	2	0.0173913	5	0.00497512
DDRGK1	2	0.0173913	2	0.00199005
DERA	2	0.0173913	3	0.00298507
DGKA	2	0.0173913	2	0.00199005
DGKE	2	0.0173913	3	0.00298507
DGKG	2	0.0173913	6	0.00597015
DHX33	2	0.0173913	2	0.00199005
DHX36	2	0.0173913	3	0.00298507
DIP2B	2	0.0173913	3	0.00298507
DLG1	2	0.0173913	5	0.00497512
DNAH1	2	0.0173913	3	0.00298507
DNAH2	2	0.0173913	4	0.0039801
DNAH6	2	0.0173913	4	0.0039801
DOCK6	2	0.0173913	5	0.00497512
DPP4	2	0.0173913	5	0.00497512
DPP6	2	0.0173913	12	0.0119403
DPY19L4	2	0.0173913	3	0.00298507
DTNBP1	2	0.0173913	5	0.00497512
DVL3	2	0.0173913	2	0.00199005
EBF1	2	0.0173913	12	0.0119403
EBF4	2	0.0173913	3	0.00298507
ECM1	2	0.0173913	2	0.00199005
ECPAS	2	0.0173913	2	0.00199005
EDNRB	2	0.0173913	3	0.00298507
EFNA3	2	0.0173913	6	0.00597015
EFR3A	2	0.0173913	5	0.00497512
EFR3B	2	0.0173913	2	0.00199005
ELL	2	0.0173913	3	0.00298507
EPC1	2	0.0173913	3	0.00298507
EPG5	2	0.0173913	3	0.00298507
ERBB3	2	0.0173913	3	0.00298507
ERBIN	2	0.0173913	5	0.00497512
ERCC4	2	0.0173913	2	0.00199005
ERCC6	2	0.0173913	7	0.00696517
ERLIN1	2	0.0173913	3	0.00298507
EXOC6	2	0.0173913	2	0.00199005
FAAP20	2	0.0173913	2	0.00199005
FADS2	2	0.0173913	3	0.00298507
FAM172A	2	0.0173913	9	0.00895522
FAM234A	2	0.0173913	2	0.00199005
FAM83E	2	0.0173913	3	0.00298507
FAM92A	2	0.0173913	2	0.00199005
FANCL	2	0.0173913	2	0.00199005
FANK1	2	0.0173913	6	0.00597015
FAS	2	0.0173913	3	0.00298507
FBF1	2	0.0173913	2	0.00199005
FBXO47	2	0.0173913	2	0.00199005
FER	2	0.0173913	10	0.00995025
FGD2	2	0.0173913	2	0.00199005
FGFR3	2	0.0173913	3	0.00298507
FHOD3	2	0.0173913	7	0.00696517
FKBP8	2	0.0173913	2	0.00199005
FLCN	2	0.0173913	4	0.0039801
FLT3	2	0.0173913	2	0.00199005
FLT3LG	2	0.0173913	2	0.00199005
FMO1	2	0.0173913	3	0.00298507
FN1	2	0.0173913	5	0.00497512
FOXR1	2	0.0173913	2	0.00199005
FOXRED1	2	0.0173913	2	0.00199005
FRMPD4	2	0.0173913	6	0.00597015
FSTL5	2	0.0173913	17	0.0169154
FUT10	2	0.0173913	2	0.00199005
GABPB1	2	0.0173913	2	0.00199005
GADL1	2	0.0173913	5	0.00497512
GALC	2	0.0173913	2	0.00199005
GALNT3	2	0.0173913	2	0.00199005
GARNL3	2	0.0173913	5	0.00497512
GAS7	2	0.0173913	5	0.00497512
GCN1	2	0.0173913	2	0.00199005
GDF11	2	0.0173913	2	0.00199005
GFM2	2	0.0173913	3	0.00298507
GIGYF2	2	0.0173913	6	0.00597015
GLRA3	2	0.0173913	4	0.0039801
GPATCH1	2	0.0173913	2	0.00199005
GPHN	2	0.0173913	6	0.00597015
GPNMB	2	0.0173913	2	0.00199005
GPR75-ASB3	2	0.0173913	6	0.00597015
GRAMD1B	2	0.0173913	2	0.00199005
GRB14	2	0.0173913	6	0.00597015
GRHL3	2	0.0173913	3	0.00298507
GRIP1	2	0.0173913	12	0.0119403
GRTP1	2	0.0173913	2	0.00199005
GSDMC	2	0.0173913	5	0.00497512
GTPBP10	2	0.0173913	4	0.0039801
H2BFM	2	0.0173913	2	0.00199005
HAPLN4	2	0.0173913	2	0.00199005
HEATR4	2	0.0173913	3	0.00298507
HENMT1	2	0.0173913	2	0.00199005
HEPHL1	2	0.0173913	4	0.0039801
HES3	2	0.0173913	2	0.00199005
HIVEP3	2	0.0173913	2	0.00199005
HMCN1	2	0.0173913	13	0.0129353
HPGD	2	0.0173913	2	0.00199005
HPRT1	2	0.0173913	2	0.00199005
HSD11B1L	2	0.0173913	2	0.00199005
HYI	2	0.0173913	2	0.00199005
IBTK	2	0.0173913	2	0.00199005
IDUA	2	0.0173913	5	0.00497512
IFI30	2	0.0173913	2	0.00199005
IFT140	2	0.0173913	2	0.00199005
IGHMBP2	2	0.0173913	2	0.00199005
IL18RAP	2	0.0173913	4	0.0039801
IL20RB	2	0.0173913	2	0.00199005
IL21	2	0.0173913	2	0.00199005
IMMT	2	0.0173913	2	0.00199005
IMPACT	2	0.0173913	2	0.00199005
INPP5E	2	0.0173913	2	0.00199005
IQSEC1	2	0.0173913	2	0.00199005
ITCH	2	0.0173913	2	0.00199005
ITIH4	2	0.0173913	2	0.00199005
JAG2	2	0.0173913	2	0.00199005
JAKMIP1	2	0.0173913	3	0.00298507
JAM3	2	0.0173913	2	0.00199005
KBTBD4	2	0.0173913	2	0.00199005
KCNH7	2	0.0173913	13	0.0129353
KCNIP1	2	0.0173913	3	0.00298507
KDM4B	2	0.0173913	5	0.00497512
KHDRBS2	2	0.0173913	21	0.0208955
KIAA1109	2	0.0173913	3	0.00298507
KIF19	2	0.0173913	2	0.00199005
KLC1	2	0.0173913	2	0.00199005
KLF2	2	0.0173913	2	0.00199005
KLHL2	2	0.0173913	7	0.00696517
KLHL20	2	0.0173913	2	0.00199005
KNDC1	2	0.0173913	6	0.00597015
KRT16	2	0.0173913	2	0.00199005
KRT31	2	0.0173913	2	0.00199005
KRT77	2	0.0173913	2	0.00199005
L34079.2	2	0.0173913	5	0.00497512
LAMA2	2	0.0173913	9	0.00895522
LAMA4	2	0.0173913	4	0.0039801
LAMB2	2	0.0173913	2	0.00199005
LBHD1	2	0.0173913	6	0.00597015
LCP2	2	0.0173913	3	0.00298507
LEPROTL1	2	0.0173913	9	0.00895522
LOXL4	2	0.0173913	2	0.00199005
LRP1	2	0.0173913	3	0.00298507
LRSAM1	2	0.0173913	2	0.00199005
LSM14B	2	0.0173913	2	0.00199005
LUC7L	2	0.0173913	2	0.00199005
LYST	2	0.0173913	7	0.00696517
MAGIX	2	0.0173913	2	0.00199005
MAP2K5	2	0.0173913	4	0.0039801
MAP3K6	2	0.0173913	2	0.00199005
MAP4K4	2	0.0173913	7	0.00696517
MAP7D1	2	0.0173913	2	0.00199005
MBD2	2	0.0173913	3	0.00298507
MCC	2	0.0173913	8	0.0079602
MCF2L	2	0.0173913	5	0.00497512
MCM3	2	0.0173913	2	0.00199005
MCPH1	2	0.0173913	14	0.0139303
MCTP2	2	0.0173913	8	0.0079602
MDM1	2	0.0173913	8	0.0079602
MDN1	2	0.0173913	2	0.00199005
MED4	2	0.0173913	2	0.00199005
MEGF9	2	0.0173913	2	0.00199005
METTL26	2	0.0173913	2	0.00199005
MGAT5	2	0.0173913	5	0.00497512
MICAL1	2	0.0173913	3	0.00298507
MLIP	2	0.0173913	8	0.0079602
MMP10	2	0.0173913	2	0.00199005
MMP8	2	0.0173913	2	0.00199005
MMS19	2	0.0173913	2	0.00199005
MPP1	2	0.0173913	2	0.00199005
MRO	2	0.0173913	2	0.00199005
MSMO1	2	0.0173913	3	0.00298507
MTCL1	2	0.0173913	4	0.0039801
MTO1	2	0.0173913	3	0.00298507
MTOR	2	0.0173913	3	0.00298507
MUC2	2	0.0173913	3	0.00298507
MUC6	2	0.0173913	2	0.00199005
MYCBP2	2	0.0173913	5	0.00497512
MYO15A	2	0.0173913	4	0.0039801
MYO1E	2	0.0173913	5	0.00497512
MYO7A	2	0.0173913	2	0.00199005
MYOF	2	0.0173913	2	0.00199005
MYOM2	2	0.0173913	3	0.00298507
N4BP2L2	2	0.0173913	3	0.00298507
NALCN	2	0.0173913	8	0.0079602
NCF4	2	0.0173913	2	0.00199005
NCKAP1L	2	0.0173913	2	0.00199005
NCOA7	2	0.0173913	2	0.00199005
NDST2	2	0.0173913	2	0.00199005
NEBL	2	0.0173913	3	0.00298507
NFKBIE	2	0.0173913	3	0.00298507
NIM1K	2	0.0173913	2	0.00199005
NKTR	2	0.0173913	3	0.00298507
NPC1	2	0.0173913	3	0.00298507
NPHP4	2	0.0173913	3	0.00298507
NPL	2	0.0173913	3	0.00298507
NRCAM	2	0.0173913	4	0.0039801
NRN1	2	0.0173913	2	0.00199005
NT5DC1	2	0.0173913	12	0.0119403
NUP210	2	0.0173913	2	0.00199005
NUP210L	2	0.0173913	2	0.00199005
NUP98	2	0.0173913	4	0.0039801
NVL	2	0.0173913	2	0.00199005
OGA	2	0.0173913	2	0.00199005
OGG1	2	0.0173913	6	0.00597015
OPN3	2	0.0173913	9	0.00895522
OSMR	2	0.0173913	2	0.00199005
OVCH1	2	0.0173913	5	0.00497512
OVCH1-AS1	2	0.0173913	8	0.0079602
PAFAH1B2	2	0.0173913	2	0.00199005
PALM	2	0.0173913	2	0.00199005
PALM2-AKAP2	2	0.0173913	13	0.0129353
PAQR3	2	0.0173913	3	0.00298507
PARP4	2	0.0173913	3	0.00298507
PARVB	2	0.0173913	4	0.0039801
PATL1	2	0.0173913	2	0.00199005
PAX4	2	0.0173913	3	0.00298507
PCDHA13	2	0.0173913	14	0.0139303
PCSK6	2	0.0173913	4	0.0039801
PDCD11	2	0.0173913	3	0.00298507
PDE6H	2	0.0173913	2	0.00199005
PDGFD	2	0.0173913	17	0.0169154
PELI1	2	0.0173913	4	0.0039801
PER2	2	0.0173913	2	0.00199005
PEX10	2	0.0173913	3	0.00298507
PFKM	2	0.0173913	2	0.00199005
PFKP	2	0.0173913	6	0.00597015
PI4KA	2	0.0173913	5	0.00497512
PIGG	2	0.0173913	3	0.00298507
PIK3C2B	2	0.0173913	5	0.00497512
PITPNM1	2	0.0173913	2	0.00199005
PKHD1	2	0.0173913	12	0.0119403
PKHD1L1	2	0.0173913	7	0.00696517
PKN1	2	0.0173913	3	0.00298507
PKNOX1	2	0.0173913	2	0.00199005
PKP2	2	0.0173913	3	0.00298507
PLAU	2	0.0173913	3	0.00298507
PLCD1	2	0.0173913	2	0.00199005
PLEKHA7	2	0.0173913	5	0.00497512
PLEKHG5	2	0.0173913	2	0.00199005
PNPLA7	2	0.0173913	3	0.00298507
POC1B	2	0.0173913	11	0.0109453
POLA1	2	0.0173913	5	0.00497512
POLD1	2	0.0173913	2	0.00199005
POLQ	2	0.0173913	5	0.00497512
POLR3A	2	0.0173913	3	0.00298507
POLR3D	2	0.0173913	2	0.00199005
POLRMT	2	0.0173913	2	0.00199005
POSTN	2	0.0173913	3	0.00298507
PPAT	2	0.0173913	5	0.00497512
PPFIA3	2	0.0173913	3	0.00298507
PPP1R14C	2	0.0173913	2	0.00199005
PPP2R2A	2	0.0173913	2	0.00199005
PPP4R4	2	0.0173913	4	0.0039801
PRDM15	2	0.0173913	3	0.00298507
PREX1	2	0.0173913	4	0.0039801
PRKAG1	2	0.0173913	3	0.00298507
PRKCQ	2	0.0173913	4	0.0039801
PRKG1	2	0.0173913	20	0.0199005
PRKG2	2	0.0173913	5	0.00497512
PRMT8	2	0.0173913	4	0.0039801
PRRT4	2	0.0173913	2	0.00199005
PRSS37	2	0.0173913	2	0.00199005
PRSS45	2	0.0173913	2	0.00199005
PUS7	2	0.0173913	2	0.00199005
PYGO1	2	0.0173913	2	0.00199005
RAB2A	2	0.0173913	2	0.00199005
RAB5A	2	0.0173913	2	0.00199005
RAD54L	2	0.0173913	3	0.00298507
RALGPS2	2	0.0173913	9	0.00895522
RAMP2	2	0.0173913	2	0.00199005
RASA3	2	0.0173913	6	0.00597015
RASGEF1C	2	0.0173913	2	0.00199005
RASGRF1	2	0.0173913	4	0.0039801
RB1	2	0.0173913	35	0.0348259
RBAK-RBAKDN	2	0.0173913	11	0.0109453
RBM14-RBM4	2	0.0173913	11	0.0109453
RECK	2	0.0173913	2	0.00199005
RECQL5	2	0.0173913	4	0.0039801
RELN	2	0.0173913	10	0.00995025
RERE	2	0.0173913	5	0.00497512
RET	2	0.0173913	4	0.0039801
RFC2	2	0.0173913	2	0.00199005
RFX1	2	0.0173913	2	0.00199005
RFXANK	2	0.0173913	3	0.00298507
RGCC	2	0.0173913	2	0.00199005
RHOBTB3	2	0.0173913	4	0.0039801
RHOT2	2	0.0173913	2	0.00199005
RLBP1	2	0.0173913	2	0.00199005
RNF115	2	0.0173913	2	0.00199005
RNF123	2	0.0173913	6	0.00597015
RNF166	2	0.0173913	2	0.00199005
RNF24	2	0.0173913	2	0.00199005
RNF40	2	0.0173913	3	0.00298507
ROBO3	2	0.0173913	3	0.00298507
RP11-1035H13.3	2	0.0173913	3	0.00298507
RP11-144F15.1	2	0.0173913	14	0.0139303
RP11-178C3.1	2	0.0173913	6	0.00597015
RP11-201K10.3	2	0.0173913	6	0.00597015
RP11-211G3.3	2	0.0173913	13	0.0129353
RP11-295K3.1	2	0.0173913	8	0.0079602
RP11-315D16.2	2	0.0173913	6	0.00597015
RP11-343C2.11	2	0.0173913	8	0.0079602
RP11-724O16.1	2	0.0173913	5	0.00497512
RP11-73M18.2	2	0.0173913	3	0.00298507
RP11-80A15.1	2	0.0173913	3	0.00298507
RP11-81K2.1	2	0.0173913	4	0.0039801
RP11-831H9.11	2	0.0173913	2	0.00199005
RP11-834C11.12	2	0.0173913	8	0.0079602
RP11-934B9.3	2	0.0173913	2	0.00199005
RP4-559A3.7	2	0.0173913	2	0.00199005
RPL31	2	0.0173913	5	0.00497512
RPS6KB2	2	0.0173913	2	0.00199005
RS1	2	0.0173913	7	0.00696517
RSPH14	2	0.0173913	9	0.00895522
RSPO4	2	0.0173913	2	0.00199005
RTKN2	2	0.0173913	2	0.00199005
RTN4IP1	2	0.0173913	2	0.00199005
RTRAF	2	0.0173913	2	0.00199005
RUNX2	2	0.0173913	6	0.00597015
RXYLT1	2	0.0173913	2	0.00199005
RYR1	2	0.0173913	3	0.00298507
RYR2	2	0.0173913	13	0.0129353
SAA2	2	0.0173913	2	0.00199005
SAR1A	2	0.0173913	2	0.00199005
SATB2	2	0.0173913	2	0.00199005
SCAP	2	0.0173913	2	0.00199005
SCARF1	2	0.0173913	2	0.00199005
SCN5A	2	0.0173913	3	0.00298507
SEBOX	2	0.0173913	2	0.00199005
SEC24A	2	0.0173913	2	0.00199005
SEC24C	2	0.0173913	3	0.00298507
SELP	2	0.0173913	3	0.00298507
SENP7	2	0.0173913	8	0.0079602
SEPT6	2	0.0173913	3	0.00298507
SEPT8	2	0.0173913	4	0.0039801
SERPINB10	2	0.0173913	3	0.00298507
SERPINF2	2	0.0173913	2	0.00199005
SETD5	2	0.0173913	2	0.00199005
SFMBT1	2	0.0173913	2	0.00199005
SFTPC	2	0.0173913	2	0.00199005
SGK1	2	0.0173913	5	0.00497512
SH3TC1	2	0.0173913	3	0.00298507
SHANK2	2	0.0173913	11	0.0109453
SHROOM2	2	0.0173913	7	0.00696517
SIDT2	2	0.0173913	2	0.00199005
SLC15A2	2	0.0173913	3	0.00298507
SLC16A5	2	0.0173913	2	0.00199005
SLC17A3	2	0.0173913	3	0.00298507
SLC26A3	2	0.0173913	2	0.00199005
SLC27A3	2	0.0173913	2	0.00199005
SLC2A2	2	0.0173913	2	0.00199005
SLC37A1	2	0.0173913	4	0.0039801
SLC38A10	2	0.0173913	7	0.00696517
SLC5A5	2	0.0173913	2	0.00199005
SLC6A2	2	0.0173913	9	0.00895522
SLC7A7	2	0.0173913	2	0.00199005
SLFN12	2	0.0173913	2	0.00199005
SLTM	2	0.0173913	2	0.00199005
SMAD9	2	0.0173913	2	0.00199005
SMARCC2	2	0.0173913	2	0.00199005
SMARCD3	2	0.0173913	3	0.00298507
SMCHD1	2	0.0173913	4	0.0039801
SMOC2	2	0.0173913	6	0.00597015
SMPDL3A	2	0.0173913	3	0.00298507
SNAPC4	2	0.0173913	3	0.00298507
SND1	2	0.0173913	16	0.0159204
SNRNP200	2	0.0173913	2	0.00199005
SNTG2	2	0.0173913	10	0.00995025
SOHLH1	2	0.0173913	2	0.00199005
SORBS3	2	0.0173913	4	0.0039801
SP110	2	0.0173913	4	0.0039801
SPATA20	2	0.0173913	2	0.00199005
SPEN	2	0.0173913	3	0.00298507
SPTAN1	2	0.0173913	3	0.00298507
SPTB	2	0.0173913	4	0.0039801
SPTBN2	2	0.0173913	2	0.00199005
SPTBN4	2	0.0173913	3	0.00298507
SRC	2	0.0173913	2	0.00199005
STAU2	2	0.0173913	13	0.0129353
STIM1	2	0.0173913	4	0.0039801
STK32B	2	0.0173913	5	0.00497512
STRC	2	0.0173913	2	0.00199005
SUPT5H	2	0.0173913	2	0.00199005
SYCP2L	2	0.0173913	2	0.00199005
SYNE1	2	0.0173913	6	0.00597015
SYTL2	2	0.0173913	2	0.00199005
TBX3	2	0.0173913	3	0.00298507
TCF3	2	0.0173913	2	0.00199005
TCP1	2	0.0173913	2	0.00199005
TENM2	2	0.0173913	11	0.0109453
TENT4A	2	0.0173913	3	0.00298507
TET1	2	0.0173913	2	0.00199005
TEX11	2	0.0173913	7	0.00696517
TFR2	2	0.0173913	2	0.00199005
TGFB2	2	0.0173913	3	0.00298507
THOC7	2	0.0173913	2	0.00199005
THRAP3	2	0.0173913	4	0.0039801
THUMPD2	2	0.0173913	3	0.00298507
TMC1	2	0.0173913	8	0.0079602
TMEM110-MUSTN1	2	0.0173913	2	0.00199005
TMEM145	2	0.0173913	2	0.00199005
TMEM151B	2	0.0173913	3	0.00298507
TMEM167B	2	0.0173913	2	0.00199005
TMEM41A	2	0.0173913	2	0.00199005
TMEM87A	2	0.0173913	2	0.00199005
TMPO	2	0.0173913	2	0.00199005
TMPRSS6	2	0.0173913	2	0.00199005
TNFAIP2	2	0.0173913	2	0.00199005
TNIK	2	0.0173913	6	0.00597015
TOP1MT	2	0.0173913	2	0.00199005
TOPAZ1	2	0.0173913	2	0.00199005
TPCN2	2	0.0173913	2	0.00199005
TPH2	2	0.0173913	4	0.0039801
TPO	2	0.0173913	4	0.0039801
TPR	2	0.0173913	4	0.0039801
TRAM2	2	0.0173913	4	0.0039801
TRIM25	2	0.0173913	2	0.00199005
TRIM67	2	0.0173913	2	0.00199005
TTC19	2	0.0173913	2	0.00199005
TTC23L	2	0.0173913	3	0.00298507
TTC8	2	0.0173913	4	0.0039801
TTN	2	0.0173913	27	0.0268657
TWF1	2	0.0173913	2	0.00199005
TXNL1	2	0.0173913	3	0.00298507
UBA1	2	0.0173913	2	0.00199005
UBA6	2	0.0173913	4	0.0039801
UGT2A1	2	0.0173913	9	0.00895522
URGCP-MRPS24	2	0.0173913	13	0.0129353
USP14	2	0.0173913	4	0.0039801
USP25	2	0.0173913	4	0.0039801
USP45	2	0.0173913	2	0.00199005
USP7	2	0.0173913	5	0.00497512
USP8	2	0.0173913	2	0.00199005
UTRN	2	0.0173913	9	0.00895522
UVSSA	2	0.0173913	4	0.0039801
VSIG8	2	0.0173913	3	0.00298507
WDHD1	2	0.0173913	2	0.00199005
WDR5	2	0.0173913	2	0.00199005
XKR9	2	0.0173913	2	0.00199005
YARS2	2	0.0173913	2	0.00199005
YIPF1	2	0.0173913	2	0.00199005
YPEL1	2	0.0173913	2	0.00199005
YPEL4	2	0.0173913	2	0.00199005
ZBTB8A	2	0.0173913	2	0.00199005
ZC3H12D	2	0.0173913	2	0.00199005
ZC3H15	2	0.0173913	2	0.00199005
ZDHHC8	2	0.0173913	3	0.00298507
ZNF131	2	0.0173913	2	0.00199005
ZNF414	2	0.0173913	3	0.00298507
ZNF496	2	0.0173913	2	0.00199005
ZNF583	2	0.0173913	2	0.00199005
ZNF804B	2	0.0173913	19	0.0189055
ZUP1	2	0.0173913	2	0.00199005
A2ML1	1	0.00869565	2	0.00199005
AADACL4	1	0.00869565	1	0.000995025
ABCA13	1	0.00869565	12	0.0119403
ABCA5	1	0.00869565	2	0.00199005
ABCA6	1	0.00869565	4	0.0039801
ABCA8	1	0.00869565	1	0.000995025
ABHD1	1	0.00869565	1	0.000995025
ABI3BP	1	0.00869565	8	0.0079602
AC003002.6	1	0.00869565	1	0.000995025
AC007401.2	1	0.00869565	7	0.00696517
AC026407.1	1	0.00869565	1	0.000995025
AC090673.2	1	0.00869565	3	0.00298507
AC110084.1	1	0.00869565	1	0.000995025
AC112205.1	1	0.00869565	3	0.00298507
AC139100.2	1	0.00869565	7	0.00696517
ACADM	1	0.00869565	1	0.000995025
ACSS1	1	0.00869565	2	0.00199005
ADAM11	1	0.00869565	1	0.000995025
ADAM12	1	0.00869565	5	0.00497512
ADAM9	1	0.00869565	1	0.000995025
ADAMTS12	1	0.00869565	7	0.00696517
ADAMTSL2	1	0.00869565	1	0.000995025
ADARB2	1	0.00869565	10	0.00995025
ADCY2	1	0.00869565	6	0.00597015
ADGRB3	1	0.00869565	10	0.00995025
ADGRL1	1	0.00869565	1	0.000995025
ADORA3	1	0.00869565	1	0.000995025
AGBL2	1	0.00869565	4	0.0039801
AGFG2	1	0.00869565	2	0.00199005
AHRR	1	0.00869565	7	0.00696517
AJAP1	1	0.00869565	4	0.0039801
AKAP8	1	0.00869565	1	0.000995025
AKAP9	1	0.00869565	1	0.000995025
AL031663.1	1	0.00869565	1	0.000995025
AL137026.1	1	0.00869565	5	0.00497512
AL161645.2	1	0.00869565	1	0.000995025
AL163636.6	1	0.00869565	1	0.000995025
ALDH1A1	1	0.00869565	1	0.000995025
ALDH1A2	1	0.00869565	5	0.00497512
ALDH5A1	1	0.00869565	1	0.000995025
ALDOA	1	0.00869565	1	0.000995025
ALKAL2	1	0.00869565	1	0.000995025
ALS2CL	1	0.00869565	1	0.000995025
AMDHD2	1	0.00869565	2	0.00199005
ANK2	1	0.00869565	6	0.00597015
ANKRD45	1	0.00869565	1	0.000995025
ANTXR1	1	0.00869565	5	0.00497512
AOX1	1	0.00869565	3	0.00298507
AP3B2	1	0.00869565	2	0.00199005
AP3S1	1	0.00869565	1	0.000995025
APLP2	1	0.00869565	1	0.000995025
AQR	1	0.00869565	1	0.000995025
ARGLU1	1	0.00869565	1	0.000995025
ARHGAP18	1	0.00869565	4	0.0039801
ARHGAP26	1	0.00869565	11	0.0109453
ARHGEF15	1	0.00869565	1	0.000995025
ARID5B	1	0.00869565	3	0.00298507
ARL13B	1	0.00869565	3	0.00298507
ARL6IP1	1	0.00869565	1	0.000995025
ARMH3	1	0.00869565	4	0.0039801
ASAH1	1	0.00869565	1	0.000995025
ASAH2B	1	0.00869565	2	0.00199005
ASB8	1	0.00869565	1	0.000995025
ASCC3	1	0.00869565	9	0.00895522
ASPG	1	0.00869565	2	0.00199005
ASPM	1	0.00869565	4	0.0039801
ATF3	1	0.00869565	1	0.000995025
ATG7	1	0.00869565	4	0.0039801
ATL2	1	0.00869565	2	0.00199005
ATP1A4	1	0.00869565	2	0.00199005
ATP2C1	1	0.00869565	4	0.0039801
ATP5IF1	1	0.00869565	1	0.000995025
ATP7A	1	0.00869565	2	0.00199005
ATP9B	1	0.00869565	5	0.00497512
ATXN7	1	0.00869565	2	0.00199005
AUP1	1	0.00869565	1	0.000995025
BCL11B	1	0.00869565	1	0.000995025
BCL2L15	1	0.00869565	1	0.000995025
BIVM-ERCC5	1	0.00869565	7	0.00696517
BMP8B	1	0.00869565	8	0.0079602
BOD1L1	1	0.00869565	6	0.00597015
BRAT1	1	0.00869565	1	0.000995025
BRF1	1	0.00869565	4	0.0039801
BRIP1	1	0.00869565	2	0.00199005
BRWD3	1	0.00869565	7	0.00696517
BTN3A3	1	0.00869565	1	0.000995025
C11orf49	1	0.00869565	1	0.000995025
C12orf4	1	0.00869565	1	0.000995025
C19orf57	1	0.00869565	1	0.000995025
C1orf35	1	0.00869565	1	0.000995025
C7orf55-LUC7L2	1	0.00869565	2	0.00199005
CA7	1	0.00869565	1	0.000995025
CACNA1C	1	0.00869565	11	0.0109453
CACNA2D1	1	0.00869565	7	0.00696517
CAD	1	0.00869565	1	0.000995025
CADM1	1	0.00869565	7	0.00696517
CADPS2	1	0.00869565	15	0.0149254
CAMK2D	1	0.00869565	7	0.00696517
CAMKK1	1	0.00869565	1	0.000995025
CAMSAP1	1	0.00869565	1	0.000995025
CANX	1	0.00869565	1	0.000995025
CARD10	1	0.00869565	1	0.000995025
CAT	1	0.00869565	1	0.000995025
CATSPER3	1	0.00869565	1	0.000995025
CATSPER4	1	0.00869565	1	0.000995025
CCDC14	1	0.00869565	1	0.000995025
CCDC158	1	0.00869565	1	0.000995025
CCDC22	1	0.00869565	1	0.000995025
CCDC40	1	0.00869565	2	0.00199005
CCDC85A	1	0.00869565	5	0.00497512
CCDC91	1	0.00869565	5	0.00497512
CCDC93	1	0.00869565	1	0.000995025
CCNI	1	0.00869565	1	0.000995025
CCNK	1	0.00869565	1	0.000995025
CD96	1	0.00869565	10	0.00995025
CDC42BPB	1	0.00869565	5	0.00497512
CDCP1	1	0.00869565	3	0.00298507
CDH5	1	0.00869565	2	0.00199005
CDHR1	1	0.00869565	1	0.000995025
CDHR3	1	0.00869565	1	0.000995025
CDRT1	1	0.00869565	1	0.000995025
CELF6	1	0.00869565	1	0.000995025
CEMIP2	1	0.00869565	2	0.00199005
CENPS	1	0.00869565	2	0.00199005
CENPS-CORT	1	0.00869565	2	0.00199005
CEP135	1	0.00869565	1	0.000995025
CEP152	1	0.00869565	3	0.00298507
CEP250	1	0.00869565	1	0.000995025
CERCAM	1	0.00869565	2	0.00199005
CFH	1	0.00869565	1	0.000995025
CFLAR	1	0.00869565	2	0.00199005
CHAT	1	0.00869565	1	0.000995025
CHD6	1	0.00869565	4	0.0039801
CHN1	1	0.00869565	3	0.00298507
CHURC1-FNTB	1	0.00869565	4	0.0039801
CLASP2	1	0.00869565	2	0.00199005
CLCN5	1	0.00869565	8	0.0079602
CLIP4	1	0.00869565	1	0.000995025
CLTCL1	1	0.00869565	6	0.00597015
CMAS	1	0.00869565	2	0.00199005
CMC4	1	0.00869565	1	0.000995025
CMSS1	1	0.00869565	12	0.0119403
CMYA5	1	0.00869565	3	0.00298507
CNN3	1	0.00869565	1	0.000995025
CNNM1	1	0.00869565	1	0.000995025
CNOT7	1	0.00869565	1	0.000995025
CNTNAP1	1	0.00869565	1	0.000995025
CNTNAP5	1	0.00869565	16	0.0159204
COG5	1	0.00869565	5	0.00497512
COL12A1	1	0.00869565	6	0.00597015
COL15A1	1	0.00869565	3	0.00298507
COL24A1	1	0.00869565	4	0.0039801
COL4A4	1	0.00869565	2	0.00199005
COL5A1	1	0.00869565	6	0.00597015
COL5A2	1	0.00869565	5	0.00497512
COPZ2	1	0.00869565	1	0.000995025
COQ8A	1	0.00869565	1	0.000995025
CPA3	1	0.00869565	1	0.000995025
CPSF1	1	0.00869565	3	0.00298507
CRACR2B	1	0.00869565	1	0.000995025
CRAMP1	1	0.00869565	1	0.000995025
CRISP2	1	0.00869565	3	0.00298507
CROT	1	0.00869565	2	0.00199005
CRYBG3	1	0.00869565	4	0.0039801
CRYZL1	1	0.00869565	1	0.000995025
CSN2	1	0.00869565	1	0.000995025
CTBS	1	0.00869565	1	0.000995025
CTC-360G5.8	1	0.00869565	3	0.00298507
CTC-435M10.3	1	0.00869565	11	0.0109453
CTD-2215E18.1	1	0.00869565	10	0.00995025
CTD-2330K9.3	1	0.00869565	4	0.0039801
CTD-2410N18.5	1	0.00869565	5	0.00497512
CTR9	1	0.00869565	1	0.000995025
CTSS	1	0.00869565	1	0.000995025
CWC22	1	0.00869565	1	0.000995025
CXCL12	1	0.00869565	4	0.0039801
CYB5R3	1	0.00869565	3	0.00298507
CYP26C1	1	0.00869565	1	0.000995025
CYP7B1	1	0.00869565	8	0.0079602
DAAM2	1	0.00869565	2	0.00199005
DAGLA	1	0.00869565	1	0.000995025
DBNDD1	1	0.00869565	1	0.000995025
DCAF8	1	0.00869565	2	0.00199005
DCC	1	0.00869565	10	0.00995025
DCUN1D5	1	0.00869565	1	0.000995025
DDX20	1	0.00869565	2	0.00199005
DDX60L	1	0.00869565	1	0.000995025
DENND5B	1	0.00869565	3	0.00298507
DEPTOR	1	0.00869565	2	0.00199005
DFFA	1	0.00869565	1	0.000995025
DFFB	1	0.00869565	1	0.000995025
DGCR2	1	0.00869565	2	0.00199005
DIAPH2	1	0.00869565	23	0.0228856
DKK3	1	0.00869565	2	0.00199005
DLEC1	1	0.00869565	1	0.000995025
DMBX1	1	0.00869565	1	0.000995025
DNAH17	1	0.00869565	3	0.00298507
DNAH8	1	0.00869565	5	0.00497512
DNAH9	1	0.00869565	5	0.00497512
DNAJC11	1	0.00869565	1	0.000995025
DNAJC13	1	0.00869565	2	0.00199005
DNAJC21	1	0.00869565	1	0.000995025
DNPH1	1	0.00869565	2	0.00199005
DOCK1	1	0.00869565	7	0.00696517
DOCK11	1	0.00869565	3	0.00298507
DOCK9	1	0.00869565	3	0.00298507
DPEP1	1	0.00869565	1	0.000995025
DPH6	1	0.00869565	3	0.00298507
DPPA2	1	0.00869565	3	0.00298507
DPY19L1	1	0.00869565	2	0.00199005
DPY19L3	1	0.00869565	1	0.000995025
DYNC1H1	1	0.00869565	2	0.00199005
DYNC2H1	1	0.00869565	5	0.00497512
DYTN	1	0.00869565	3	0.00298507
E2F1	1	0.00869565	1	0.000995025
EFNB2	1	0.00869565	2	0.00199005
EGFLAM	1	0.00869565	4	0.0039801
EIF4G2	1	0.00869565	2	0.00199005
EIF5A	1	0.00869565	1	0.000995025
ELN	1	0.00869565	2	0.00199005
EML4	1	0.00869565	1	0.000995025
ENAM	1	0.00869565	2	0.00199005
ENO4	1	0.00869565	3	0.00298507
ENPP2	1	0.00869565	5	0.00497512
ENTHD1	1	0.00869565	1	0.000995025
ENTPD3	1	0.00869565	2	0.00199005
EPAS1	1	0.00869565	2	0.00199005
EPB42	1	0.00869565	1	0.000995025
EPHA3	1	0.00869565	16	0.0159204
EPHX2	1	0.00869565	2	0.00199005
ERAP1	1	0.00869565	10	0.00995025
ERG	1	0.00869565	2	0.00199005
ESYT3	1	0.00869565	1	0.000995025
ETFDH	1	0.00869565	1	0.000995025
EVC	1	0.00869565	3	0.00298507
EZH2	1	0.00869565	1	0.000995025
FARP1	1	0.00869565	5	0.00497512
FAT3	1	0.00869565	10	0.00995025
FAXC	1	0.00869565	1	0.000995025
FBXO24	1	0.00869565	2	0.00199005
FGF12	1	0.00869565	8	0.0079602
FHIT	1	0.00869565	10	0.00995025
FKBP9	1	0.00869565	3	0.00298507
FLII	1	0.00869565	1	0.000995025
FRAS1	1	0.00869565	7	0.00696517
FRMD4A	1	0.00869565	9	0.00895522
FRMD7	1	0.00869565	2	0.00199005
FRYL	1	0.00869565	5	0.00497512
FUBP3	1	0.00869565	1	0.000995025
FXYD7	1	0.00869565	2	0.00199005
FYB1	1	0.00869565	5	0.00497512
GAD1	1	0.00869565	1	0.000995025
GADD45A	1	0.00869565	1	0.000995025
GALE	1	0.00869565	1	0.000995025
GALNT15	1	0.00869565	2	0.00199005
GAPDH	1	0.00869565	1	0.000995025
GASK1A	1	0.00869565	2	0.00199005
GATA1	1	0.00869565	1	0.000995025
GATD3A	1	0.00869565	1	0.000995025
GCNT2	1	0.00869565	4	0.0039801
GFPT2	1	0.00869565	3	0.00298507
GGA1	1	0.00869565	1	0.000995025
GLG1	1	0.00869565	1	0.000995025
GMEB1	1	0.00869565	1	0.000995025
GMFB	1	0.00869565	1	0.000995025
GNPTAB	1	0.00869565	1	0.000995025
GOLPH3L	1	0.00869565	1	0.000995025
GPC3	1	0.00869565	9	0.00895522
GPD2	1	0.00869565	1	0.000995025
GPR137B	1	0.00869565	2	0.00199005
GPRC6A	1	0.00869565	1	0.000995025
GPT2	1	0.00869565	1	0.000995025
GRHL2	1	0.00869565	2	0.00199005
GRIK2	1	0.00869565	9	0.00895522
GRK5	1	0.00869565	4	0.0039801
GRM1	1	0.00869565	8	0.0079602
GRM2	1	0.00869565	1	0.000995025
GSDMB	1	0.00869565	1	0.000995025
GSG1L	1	0.00869565	3	0.00298507
GTF2E1	1	0.00869565	1	0.000995025
GTF2F2	1	0.00869565	2	0.00199005
H3F3A	1	0.00869565	1	0.000995025
HCN1	1	0.00869565	19	0.0189055
HDX	1	0.00869565	1	0.000995025
HEATR5B	1	0.00869565	2	0.00199005
HECTD4	1	0.00869565	3	0.00298507
HERC2	1	0.00869565	2	0.00199005
HHAT	1	0.00869565	5	0.00497512
HIRA	1	0.00869565	1	0.000995025
HMGA2	1	0.00869565	7	0.00696517
HOGA1	1	0.00869565	5	0.00497512
HR	1	0.00869565	2	0.00199005
HRASLS2	1	0.00869565	1	0.000995025
HSPG2	1	0.00869565	4	0.0039801
HSPH1	1	0.00869565	2	0.00199005
IDE	1	0.00869565	2	0.00199005
IFT74	1	0.00869565	1	0.000995025
IGF2BP3	1	0.00869565	2	0.00199005
IGFBP7	1	0.00869565	3	0.00298507
IL17F	1	0.00869565	1	0.000995025
IL1RAPL2	1	0.00869565	25	0.0248756
IL6ST	1	0.00869565	1	0.000995025
ILF2	1	0.00869565	1	0.000995025
ILF3	1	0.00869565	4	0.0039801
ILK	1	0.00869565	1	0.000995025
ING5	1	0.00869565	1	0.000995025
INPP5A	1	0.00869565	2	0.00199005
IPO11	1	0.00869565	4	0.0039801
IPO7	1	0.00869565	2	0.00199005
IQGAP1	1	0.00869565	2	0.00199005
IQGAP2	1	0.00869565	7	0.00696517
IRAK1	1	0.00869565	1	0.000995025
IRF2	1	0.00869565	2	0.00199005
IRF9	1	0.00869565	1	0.000995025
IRX4	1	0.00869565	1	0.000995025
ITGA1	1	0.00869565	5	0.00497512
ITGA4	1	0.00869565	2	0.00199005
ITGA6	1	0.00869565	2	0.00199005
ITGA7	1	0.00869565	2	0.00199005
ITGA9	1	0.00869565	3	0.00298507
ITGAE	1	0.00869565	8	0.0079602
ITGAL	1	0.00869565	1	0.000995025
ITGB7	1	0.00869565	1	0.000995025
IZUMO1	1	0.00869565	1	0.000995025
JAK1	1	0.00869565	1	0.000995025
JAML	1	0.00869565	2	0.00199005
KAT2B	1	0.00869565	2	0.00199005
KATNAL2	1	0.00869565	2	0.00199005
KCNH6	1	0.00869565	1	0.000995025
KCNIP2	1	0.00869565	1	0.000995025
KCNJ8	1	0.00869565	1	0.000995025
KCNK16	1	0.00869565	1	0.000995025
KCNK2	1	0.00869565	3	0.00298507
KCNQ1	1	0.00869565	14	0.0139303
KCNQ5	1	0.00869565	6	0.00597015
KCNT2	1	0.00869565	5	0.00497512
KDM2A	1	0.00869565	1	0.000995025
KDM5C	1	0.00869565	1	0.000995025
KDM6B	1	0.00869565	1	0.000995025
KIAA0319	1	0.00869565	2	0.00199005
KIF13A	1	0.00869565	1	0.000995025
KLK9	1	0.00869565	2	0.00199005
KMT2D	1	0.00869565	2	0.00199005
KRT15	1	0.00869565	2	0.00199005
KRT23	1	0.00869565	1	0.000995025
KRT38	1	0.00869565	1	0.000995025
KY	1	0.00869565	1	0.000995025
KYNU	1	0.00869565	4	0.0039801
LAPTM4B	1	0.00869565	1	0.000995025
LARGE1	1	0.00869565	4	0.0039801
LARP4B	1	0.00869565	2	0.00199005
LBX2	1	0.00869565	2	0.00199005
LDLRAD1	1	0.00869565	1	0.000995025
LDLRAD3	1	0.00869565	3	0.00298507
LETM2	1	0.00869565	1	0.000995025
LGALS4	1	0.00869565	1	0.000995025
LGALSL	1	0.00869565	1	0.000995025
LGI3	1	0.00869565	1	0.000995025
LILRA5	1	0.00869565	1	0.000995025
LILRB2	1	0.00869565	1	0.000995025
LIMA1	1	0.00869565	1	0.000995025
LIMK1	1	0.00869565	1	0.000995025
LIN7A	1	0.00869565	1	0.000995025
LIPF	1	0.00869565	1	0.000995025
LIPJ	1	0.00869565	2	0.00199005
LMO7	1	0.00869565	1	0.000995025
LNX1	1	0.00869565	3	0.00298507
LONRF1	1	0.00869565	1	0.000995025
LPCAT2	1	0.00869565	1	0.000995025
LPP	1	0.00869565	5	0.00497512
LRP1B	1	0.00869565	21	0.0208955
LRP2	1	0.00869565	8	0.0079602
LRP4	1	0.00869565	1	0.000995025
LRP6	1	0.00869565	3	0.00298507
LUC7L2	1	0.00869565	3	0.00298507
LYPD6B	1	0.00869565	2	0.00199005
LYVE1	1	0.00869565	1	0.000995025
MACROD1	1	0.00869565	11	0.0109453
MAGI1	1	0.00869565	5	0.00497512
MAGI2	1	0.00869565	15	0.0149254
MAML2	1	0.00869565	6	0.00597015
MAN1A2	1	0.00869565	1	0.000995025
MAP2K4	1	0.00869565	1	0.000995025
MAPK9	1	0.00869565	1	0.000995025
MARCH11	1	0.00869565	3	0.00298507
MBD3	1	0.00869565	2	0.00199005
MCM8	1	0.00869565	2	0.00199005
MCOLN2	1	0.00869565	2	0.00199005
MECOM	1	0.00869565	1	0.000995025
MED14	1	0.00869565	2	0.00199005
MED16	1	0.00869565	1	0.000995025
MED23	1	0.00869565	1	0.000995025
MEFV	1	0.00869565	1	0.000995025
MEIS1	1	0.00869565	2	0.00199005
MELTF	1	0.00869565	6	0.00597015
METTL25	1	0.00869565	2	0.00199005
MFF	1	0.00869565	3	0.00298507
MFSD2B	1	0.00869565	1	0.000995025
MICAL2	1	0.00869565	2	0.00199005
MICALL2	1	0.00869565	2	0.00199005
MIIP	1	0.00869565	1	0.000995025
MIPEP	1	0.00869565	1	0.000995025
MME	1	0.00869565	8	0.0079602
MMP26	1	0.00869565	1	0.000995025
MPI	1	0.00869565	2	0.00199005
MRPL20	1	0.00869565	1	0.000995025
MRPS17	1	0.00869565	5	0.00497512
MRPS27	1	0.00869565	2	0.00199005
MRTFB	1	0.00869565	6	0.00597015
MSANTD3-TMEFF1	1	0.00869565	1	0.000995025
MTFMT	1	0.00869565	2	0.00199005
MTFR2	1	0.00869565	1	0.000995025
MTM1	1	0.00869565	3	0.00298507
MTMR4	1	0.00869565	2	0.00199005
MUC13	1	0.00869565	1	0.000995025
MUC3A	1	0.00869565	1	0.000995025
MUC5B	1	0.00869565	1	0.000995025
MYB	1	0.00869565	1	0.000995025
MYBPC3	1	0.00869565	2	0.00199005
MYH10	1	0.00869565	3	0.00298507
MYH13	1	0.00869565	2	0.00199005
MYH7B	1	0.00869565	1	0.000995025
MYO18A	1	0.00869565	2	0.00199005
MYRFL	1	0.00869565	2	0.00199005
NBN	1	0.00869565	1	0.000995025
NBPF1	1	0.00869565	2	0.00199005
NEDD1	1	0.00869565	1	0.000995025
NEK7	1	0.00869565	3	0.00298507
NELFA	1	0.00869565	2	0.00199005
NELL1	1	0.00869565	10	0.00995025
NEMP2	1	0.00869565	1	0.000995025
NF1	1	0.00869565	22	0.0218905
NFASC	1	0.00869565	6	0.00597015
NFATC1	1	0.00869565	3	0.00298507
NIN	1	0.00869565	6	0.00597015
NISCH	1	0.00869565	2	0.00199005
NKAIN1	1	0.00869565	2	0.00199005
NLE1	1	0.00869565	1	0.000995025
NLGN4X	1	0.00869565	5	0.00497512
NLRC5	1	0.00869565	4	0.0039801
NOC3L	1	0.00869565	1	0.000995025
NOL12	1	0.00869565	1	0.000995025
NOL8	1	0.00869565	1	0.000995025
NPAS3	1	0.00869565	9	0.00895522
NPHP3	1	0.00869565	1	0.000995025
NRDC	1	0.00869565	3	0.00298507
NREP	1	0.00869565	3	0.00298507
NSUN7	1	0.00869565	1	0.000995025
NT5E	1	0.00869565	2	0.00199005
NTF3	1	0.00869565	4	0.0039801
NUDCD2	1	0.00869565	2	0.00199005
NUP153	1	0.00869565	1	0.000995025
NUP155	1	0.00869565	4	0.0039801
NUP160	1	0.00869565	1	0.000995025
NUP93	1	0.00869565	3	0.00298507
OLR1	1	0.00869565	1	0.000995025
OMA1	1	0.00869565	1	0.000995025
OPLAH	1	0.00869565	1	0.000995025
ORC3	1	0.00869565	1	0.000995025
OSBPL11	1	0.00869565	1	0.000995025
OTUD7A	1	0.00869565	4	0.0039801
OXSR1	1	0.00869565	1	0.000995025
P2RX2	1	0.00869565	2	0.00199005
PAN2	1	0.00869565	4	0.0039801
PAN3	1	0.00869565	1	0.000995025
PAPOLA	1	0.00869565	1	0.000995025
PAPPA	1	0.00869565	3	0.00298507
PAX5	1	0.00869565	3	0.00298507
PC	1	0.00869565	2	0.00199005
PCDHAC1	1	0.00869565	5	0.00497512
PCSK2	1	0.00869565	4	0.0039801
PCSK5	1	0.00869565	14	0.0139303
PDE1A	1	0.00869565	11	0.0109453
PDE3A	1	0.00869565	6	0.00597015
PDE8A	1	0.00869565	2	0.00199005
PDGFRA	1	0.00869565	5	0.00497512
PDS5B	1	0.00869565	2	0.00199005
PEX5L	1	0.00869565	5	0.00497512
PFAS	1	0.00869565	3	0.00298507
PGAP2	1	0.00869565	2	0.00199005
PGBD5	1	0.00869565	2	0.00199005
PHF14	1	0.00869565	1	0.000995025
PHF8	1	0.00869565	1	0.000995025
PHIP	1	0.00869565	4	0.0039801
PHYH	1	0.00869565	1	0.000995025
PIDD1	1	0.00869565	1	0.000995025
PIEZO2	1	0.00869565	9	0.00895522
PIGT	1	0.00869565	1	0.000995025
PIH1D2	1	0.00869565	1	0.000995025
PIK3C2G	1	0.00869565	6	0.00597015
PIK3R1	1	0.00869565	8	0.0079602
PIM1	1	0.00869565	1	0.000995025
PIM2	1	0.00869565	1	0.000995025
PIM3	1	0.00869565	1	0.000995025
PIP4P2	1	0.00869565	2	0.00199005
PIWIL1	1	0.00869565	2	0.00199005
PIWIL3	1	0.00869565	1	0.000995025
PKD1L1	1	0.00869565	5	0.00497512
PKD1L2	1	0.00869565	1	0.000995025
PLA1A	1	0.00869565	1	0.000995025
PLCB1	1	0.00869565	6	0.00597015
PLCB2	1	0.00869565	2	0.00199005
PLEKHA3	1	0.00869565	2	0.00199005
PLEKHA5	1	0.00869565	8	0.0079602
PLSCR5	1	0.00869565	1	0.000995025
PLXDC2	1	0.00869565	12	0.0119403
PLXNA3	1	0.00869565	1	0.000995025
PML	1	0.00869565	1	0.000995025
PMS2	1	0.00869565	3	0.00298507
PNLIPRP2	1	0.00869565	1	0.000995025
POLE2	1	0.00869565	2	0.00199005
POLN	1	0.00869565	2	0.00199005
POM121C	1	0.00869565	1	0.000995025
POMP	1	0.00869565	2	0.00199005
POT1	1	0.00869565	3	0.00298507
POU2F2	1	0.00869565	3	0.00298507
PPIE	1	0.00869565	3	0.00298507
PPL	1	0.00869565	1	0.000995025
PPP1R12A	1	0.00869565	3	0.00298507
PPP6R2	1	0.00869565	2	0.00199005
PRB1	1	0.00869565	4	0.0039801
PRB3	1	0.00869565	7	0.00696517
PRDX3	1	0.00869565	1	0.000995025
PREX2	1	0.00869565	7	0.00696517
PRKACB	1	0.00869565	4	0.0039801
PRKDC	1	0.00869565	1	0.000995025
PRKN	1	0.00869565	13	0.0129353
PRR4	1	0.00869565	1	0.000995025
PRSS16	1	0.00869565	1	0.000995025
PRUNE2	1	0.00869565	4	0.0039801
PTGR1	1	0.00869565	3	0.00298507
PTH2R	1	0.00869565	4	0.0039801
PTK2	1	0.00869565	3	0.00298507
PTPN18	1	0.00869565	1	0.000995025
PTPRG	1	0.00869565	11	0.0109453
PTPRJ	1	0.00869565	3	0.00298507
PTPRQ	1	0.00869565	9	0.00895522
PZP	1	0.00869565	1	0.000995025
R3HDM2	1	0.00869565	4	0.0039801
RAB36	1	0.00869565	2	0.00199005
RABGAP1L	1	0.00869565	12	0.0119403
RAD51AP1	1	0.00869565	1	0.000995025
RADIL	1	0.00869565	7	0.00696517
RAET1E	1	0.00869565	2	0.00199005
RAI14	1	0.00869565	5	0.00497512
RANBP2	1	0.00869565	2	0.00199005
RAPGEF1	1	0.00869565	1	0.000995025
RAPGEF5	1	0.00869565	11	0.0109453
RASSF5	1	0.00869565	2	0.00199005
RASSF6	1	0.00869565	3	0.00298507
RBFA	1	0.00869565	1	0.000995025
RBM14	1	0.00869565	1	0.000995025
RBM6	1	0.00869565	1	0.000995025
RBMS2	1	0.00869565	1	0.000995025
RBPMS	1	0.00869565	3	0.00298507
RC3H2	1	0.00869565	5	0.00497512
RECQL4	1	0.00869565	1	0.000995025
RFNG	1	0.00869565	1	0.000995025
RFX6	1	0.00869565	2	0.00199005
RGR	1	0.00869565	1	0.000995025
RILPL1	1	0.00869565	2	0.00199005
RIMS2	1	0.00869565	11	0.0109453
RIOK2	1	0.00869565	1	0.000995025
RMDN3	1	0.00869565	1	0.000995025
RNF168	1	0.00869565	2	0.00199005
RNF170	1	0.00869565	1	0.000995025
ROBO1	1	0.00869565	12	0.0119403
ROS1	1	0.00869565	6	0.00597015
RP1-170O19.20	1	0.00869565	9	0.00895522
RP11-1220K2.2	1	0.00869565	4	0.0039801
RP11-176H8.1	1	0.00869565	5	0.00497512
RP11-302B13.5	1	0.00869565	8	0.0079602
RP11-343C2.9	1	0.00869565	5	0.00497512
RP11-385D13.1	1	0.00869565	2	0.00199005
RP11-404P21.8	1	0.00869565	10	0.00995025
RP11-484M3.5	1	0.00869565	2	0.00199005
RP11-565P22.6	1	0.00869565	9	0.00895522
RP11-599B13.6	1	0.00869565	2	0.00199005
RP11-793H13.10	1	0.00869565	4	0.0039801
RP5-850E9.3	1	0.00869565	3	0.00298507
RPGRIP1L	1	0.00869565	3	0.00298507
RPL36A-HNRNPH2	1	0.00869565	3	0.00298507
RPL8	1	0.00869565	1	0.000995025
RPLP2	1	0.00869565	4	0.0039801
RPS20	1	0.00869565	1	0.000995025
RPS6KB1	1	0.00869565	1	0.000995025
RRAS2	1	0.00869565	2	0.00199005
RREB1	1	0.00869565	4	0.0039801
RSAD1	1	0.00869565	1	0.000995025
RSPH9	1	0.00869565	1	0.000995025
RSU1	1	0.00869565	2	0.00199005
RYR3	1	0.00869565	13	0.0129353
SAFB	1	0.00869565	2	0.00199005
SAMD13	1	0.00869565	2	0.00199005
SCAF4	1	0.00869565	1	0.000995025
SCFD1	1	0.00869565	1	0.000995025
SCML4	1	0.00869565	1	0.000995025
SCN3A	1	0.00869565	2	0.00199005
SCN4A	1	0.00869565	1	0.000995025
SCUBE1	1	0.00869565	6	0.00597015
SEC24D	1	0.00869565	3	0.00298507
SECISBP2L	1	0.00869565	1	0.000995025
SEMA3G	1	0.00869565	1	0.000995025
SERPINA7	1	0.00869565	1	0.000995025
SF3A2	1	0.00869565	1	0.000995025
SGSM2	1	0.00869565	1	0.000995025
SH3D19	1	0.00869565	2	0.00199005
SH3RF3	1	0.00869565	9	0.00895522
SHROOM3	1	0.00869565	2	0.00199005
SHROOM4	1	0.00869565	3	0.00298507
SHTN1	1	0.00869565	4	0.0039801
SLC12A6	1	0.00869565	2	0.00199005
SLC13A5	1	0.00869565	2	0.00199005
SLC17A4	1	0.00869565	2	0.00199005
SLC1A2	1	0.00869565	2	0.00199005
SLC22A15	1	0.00869565	2	0.00199005
SLC22A3	1	0.00869565	2	0.00199005
SLC22A5	1	0.00869565	2	0.00199005
SLC23A2	1	0.00869565	2	0.00199005
SLC25A13	1	0.00869565	34	0.0338308
SLC25A35	1	0.00869565	2	0.00199005
SLC29A4	1	0.00869565	1	0.000995025
SLC2A1	1	0.00869565	1	0.000995025
SLC2A14	1	0.00869565	2	0.00199005
SLC35F5	1	0.00869565	1	0.000995025
SLC38A11	1	0.00869565	3	0.00298507
SLC44A3	1	0.00869565	1	0.000995025
SLC5A12	1	0.00869565	1	0.000995025
SLC5A2	1	0.00869565	1	0.000995025
SLC8A3	1	0.00869565	2	0.00199005
SLC9A7	1	0.00869565	5	0.00497512
SLC9C2	1	0.00869565	2	0.00199005
SLIT3	1	0.00869565	16	0.0159204
SMC2	1	0.00869565	1	0.000995025
SMUG1	1	0.00869565	1	0.000995025
SNTB1	1	0.00869565	5	0.00497512
SOAT2	1	0.00869565	2	0.00199005
SORCS1	1	0.00869565	12	0.0119403
SOS1	1	0.00869565	5	0.00497512
SOSTDC1	1	0.00869565	2	0.00199005
SPAG16	1	0.00869565	13	0.0129353
SPDYA	1	0.00869565	1	0.000995025
SPDYC	1	0.00869565	1	0.000995025
SPECC1	1	0.00869565	5	0.00497512
SPEF2	1	0.00869565	8	0.0079602
SPINT2	1	0.00869565	1	0.000995025
SPIRE2	1	0.00869565	1	0.000995025
SPRTN	1	0.00869565	1	0.000995025
SRPK3	1	0.00869565	1	0.000995025
SRRM4	1	0.00869565	2	0.00199005
SRSF5	1	0.00869565	2	0.00199005
SSH3	1	0.00869565	1	0.000995025
ST8SIA4	1	0.00869565	2	0.00199005
STAB1	1	0.00869565	2	0.00199005
STAB2	1	0.00869565	4	0.0039801
STAG1	1	0.00869565	3	0.00298507
STAG2	1	0.00869565	7	0.00696517
STIM2	1	0.00869565	2	0.00199005
STN1	1	0.00869565	1	0.000995025
STX6	1	0.00869565	1	0.000995025
STXBP5L	1	0.00869565	10	0.00995025
SUCLG1	1	0.00869565	1	0.000995025
SUPT20H	1	0.00869565	1	0.000995025
SUSD1	1	0.00869565	2	0.00199005
SVEP1	1	0.00869565	3	0.00298507
SYCE1	1	0.00869565	1	0.000995025
SYN1	1	0.00869565	2	0.00199005
SYNE4	1	0.00869565	1	0.000995025
TADA2A	1	0.00869565	1	0.000995025
TBC1D21	1	0.00869565	1	0.000995025
TBC1D30	1	0.00869565	1	0.000995025
TBC1D32	1	0.00869565	2	0.00199005
TBC1D8	1	0.00869565	3	0.00298507
TBP	1	0.00869565	2	0.00199005
TBR1	1	0.00869565	1	0.000995025
TCF12	1	0.00869565	3	0.00298507
TCFL5	1	0.00869565	3	0.00298507
TCP11L2	1	0.00869565	2	0.00199005
TDGF1	1	0.00869565	1	0.000995025
TEAD1	1	0.00869565	3	0.00298507
TEKT3	1	0.00869565	1	0.000995025
TENM3	1	0.00869565	13	0.0129353
TES	1	0.00869565	5	0.00497512
TFDP2	1	0.00869565	2	0.00199005
TG	1	0.00869565	6	0.00597015
THBS2	1	0.00869565	1	0.000995025
THG1L	1	0.00869565	1	0.000995025
THOC2	1	0.00869565	3	0.00298507
THSD4	1	0.00869565	4	0.0039801
TIAM1	1	0.00869565	2	0.00199005
TIMELESS	1	0.00869565	1	0.000995025
TIMP1	1	0.00869565	1	0.000995025
TLL2	1	0.00869565	1	0.000995025
TMC7	1	0.00869565	1	0.000995025
TMEM117	1	0.00869565	9	0.00895522
TMEM132C	1	0.00869565	10	0.00995025
TMEM132D	1	0.00869565	16	0.0159204
TMIGD1	1	0.00869565	1	0.000995025
TMIGD2	1	0.00869565	1	0.000995025
TNFSF12	1	0.00869565	4	0.0039801
TNFSF12-TNFSF13	1	0.00869565	4	0.0039801
TNNI1	1	0.00869565	2	0.00199005
TNRC18	1	0.00869565	1	0.000995025
TP53TG5	1	0.00869565	2	0.00199005
TP63	1	0.00869565	10	0.00995025
TPP1	1	0.00869565	1	0.000995025
TRAK1	1	0.00869565	3	0.00298507
TRAK2	1	0.00869565	1	0.000995025
TRAPPC8	1	0.00869565	1	0.000995025
TRDN	1	0.00869565	10	0.00995025
TRIM36	1	0.00869565	1	0.000995025
TRIM37	1	0.00869565	2	0.00199005
TRIM39-RPP21	1	0.00869565	2	0.00199005
TRIM49C	1	0.00869565	1	0.000995025
TRIM5	1	0.00869565	3	0.00298507
TRIM61	1	0.00869565	4	0.0039801
TRIP10	1	0.00869565	1	0.000995025
TRIP13	1	0.00869565	1	0.000995025
TRMT44	1	0.00869565	2	0.00199005
TRO	1	0.00869565	1	0.000995025
TRPM3	1	0.00869565	6	0.00597015
TRPV5	1	0.00869565	2	0.00199005
TSGA13	1	0.00869565	1	0.000995025
TSPAN13	1	0.00869565	1	0.000995025
TSPAN16	1	0.00869565	2	0.00199005
TSPAN3	1	0.00869565	1	0.000995025
TSPAN7	1	0.00869565	4	0.0039801
TTC27	1	0.00869565	4	0.0039801
TTC34	1	0.00869565	3	0.00298507
TUBA3D	1	0.00869565	1	0.000995025
TUBGCP4	1	0.00869565	1	0.000995025
TXNDC12	1	0.00869565	5	0.00497512
TXNRD2	1	0.00869565	2	0.00199005
UBR2	1	0.00869565	2	0.00199005
UBR3	1	0.00869565	1	0.000995025
UBR5	1	0.00869565	4	0.0039801
UGDH	1	0.00869565	2	0.00199005
UGT1A3	1	0.00869565	8	0.0079602
UGT1A8	1	0.00869565	8	0.0079602
UGT2A3	1	0.00869565	2	0.00199005
UHRF1BP1	1	0.00869565	1	0.000995025
UNC13A	1	0.00869565	1	0.000995025
UNC5D	1	0.00869565	8	0.0079602
UPB1	1	0.00869565	1	0.000995025
USP10	1	0.00869565	1	0.000995025
USP19	1	0.00869565	1	0.000995025
USP31	1	0.00869565	2	0.00199005
USP37	1	0.00869565	2	0.00199005
USP47	1	0.00869565	4	0.0039801
VAMP2	1	0.00869565	1	0.000995025
VAMP7	1	0.00869565	1	0.000995025
VCL	1	0.00869565	2	0.00199005
VPS11	1	0.00869565	2	0.00199005
VPS13D	1	0.00869565	2	0.00199005
VPS39	1	0.00869565	1	0.000995025
VPS45	1	0.00869565	1	0.000995025
VSIR	1	0.00869565	1	0.000995025
VTCN1	1	0.00869565	2	0.00199005
WAC	1	0.00869565	4	0.0039801
WDR64	1	0.00869565	4	0.0039801
WDR78	1	0.00869565	3	0.00298507
WDSUB1	1	0.00869565	1	0.000995025
WWOX	1	0.00869565	11	0.0109453
XRN1	1	0.00869565	3	0.00298507
YIPF3	1	0.00869565	2	0.00199005
YJU2	1	0.00869565	1	0.000995025
ZBED9	1	0.00869565	2	0.00199005
ZDHHC9	1	0.00869565	2	0.00199005
ZFAT	1	0.00869565	2	0.00199005
ZFHX3	1	0.00869565	6	0.00597015
ZFYVE9	1	0.00869565	3	0.00298507
ZHX1-C8orf76	1	0.00869565	6	0.00597015
ZIM3	1	0.00869565	1	0.000995025
ZMAT3	1	0.00869565	1	0.000995025
ZNF205	1	0.00869565	1	0.000995025
ZNF226	1	0.00869565	1	0.000995025
ZNF321P	1	0.00869565	12	0.0119403
ZNF324B	1	0.00869565	2	0.00199005
ZNF385D	1	0.00869565	5	0.00497512
ZNF91	1	0.00869565	1	0.000995025
ZNHIT1	1	0.00869565	1	0.000995025
ZSCAN32	1	0.00869565	1	0.000995025
ZYG11B	1	0.00869565	1	0.000995025
ZZEF1	1	0.00869565	1	0.000995025

## Sheet: Table S5
Table S5. Function of genes identified in Figure 2.
Gene	Function
Coding mutations (Fig 2A)
TP53	Transcription factor involved in cell cycle regulation, checkpoint activation, and apoptosis.
ATRX/RAD54	SWI/SNF family chromatin remodelers. Involved in transcription, DNA replication, telomere structure.
TTN	Titin, a very large protein found in striated muscle.
EGFR	Epidermal growth factor receptor. Cell proliferation. Frequently mutated in lung cancers.
PTEN	Tumor suppressor involved in PI3K/AKT/mTOR signaling. Frequently mutated or deleted in cancers.
MUC16	Mucus associated protein. Extracellular matrix.
FLG	Flaggrin. Intermediate filament associated protein.
MUC4	Mucus associated protein. Extracellular matrix. May repress apoptosis and promote tumor growth.
SYNE1	Spectrin repeat containing nuclear envelope 1. Spectrin repeat containing protein expressed in skeletal and smooth muscle.
AMBRA1	Autophagy and beclin 1 regulator 1. An autophagy and trafficking protein with roles in neurogenesis and cancer cell invasion.
DLG5	Discs large MAGUK scaffold protein 5. Plasma membrane and cytoplasm. Plays a role in cell migration, cell adhesion, precursor cell division, cell proliferation, epithelial cell polarity maintenance, and transmission of extracellular signals to membrane and cytoskeleton.
ZNF429	Zinc finger protein 429. Transcriptional regulator.
CHECK2	Checkpoint gene (S-phase specific). Responds to DNA damage resulting from replication fork stalling.
RYR2	Calcium channel associated with cardiac muscle.
PIK3CA	Cell signaling, MAPK pathway. Involved in cell cycle, cell proliferation and apoptosis.
PREX1	Phosphatidylinositol-3,4,5-triphosphate dependent Rac exchange factor 1. Guanine nucleotide exchange family for RHO family of small GTP binding proteins (RACS). Controls cell migration, actin cytoskeletal rearrangement, and adhesion.
FRY	FRY microtubule binding protein. Localizes to centrosomes and spindle microtubules in early mitosis. Depletion causes multipolar spindle formation.
SPTBN1	Spectrin beta, non-erythrocytic 1. Crosslinking and molecular scaffold protein. Functions in determination of cell shape, arrangement of transmembrane proteins, and organization of organelles.
NOTCH1	Notch receptor 1. Member of NOTCH family receptors. Plays a role in the development of numerous cell and tissue types.
CALR3	Calreticulin 3. Endoplasmic reticulum. Appears to be required for sperm fertility. Novel cancer-testis antigen.
MUC17	Mucin 17. Limits inflammatory responses in the body.
NF1	Neurofibromin 1 associated with neurofibromatosis type 1.
SPTA1	Spectrin alpha, erythrocytic 1. Scaffolding protein. Links plasma membrane and actin cytoskeleton and functions in the determination of cell shape, arrangement of transmembrane proteins, and organization of organelles.
Promoter mutations (Fig. 2B)
MMP26	Matrix metallopeptidase 26. Degrades collagen type IV, fibronectin, fibrinogen, and beta casein.
HBG2	Hemoglobin subunit gamma 2. Expressed in fetal liver, spleen, and bone marrow.
HBE1	Hemoglobin subunit epsilon 1. Expressed in the embryonic yolk sac.
OR2L13	Olfactory receptor family 2 subfamily L member 13. Contains a structure with many neurotransmitter and hormone receptors. Responsible for recognition and G protein-mediated transduction of odorant signals.
KATNAL2	Katanin catalytic subunit A1 like 2. Severs microtubules in vitro in an ATP-dependent manner.
CD36	CD36 molecule. Glycoprotein. Cell adhesion molecule.
ZNF512B	Zinc finger protein 512B. Transcription factor promoting the expression of a downstream gene in the signal transduction pathway of the transforming growth factor- β (TGF-β) which plays a role in the protection and survival of neurons.
PTPRD	Protein tyrosine phosphatase receptor type D. Signaling molecule that promotes neurite growth and regulating neurons axon guidance.
SPRN	Shadow of prion protein. N-glycosylated glycophosphatidylinositol-anchored protein that is expressed in the brain and exhibits neuroprotective properties.
OR2W3	Olfactory receptor family 2 subfamily W member 3. Responsible for the recognition and G protein-mediated transduction of odorant signals.
FLJ00418	Unknown.
HOXD3	Homeobox D3. Homeoboxes are highly conserved family of transcription factors that play an important role in morphogenesis. HOXD3 plays a role in the regulation of cell adhesion processes.
C1QTNF5	C1q and TNF related 5. Functions as a component of basement membranes. Plays a role in cell adhesion.
PRSS50	Serine protease 50. Regulates cell proliferation.
SERP1	Stress associated endoplasmic reticulum protein 1. Regulates cell apoptosis and nuclear factor-κB (NF-κB) signaling pathway.
Terminator mutations (Fig. 2C)
ARHGAP19-SLIT1
RP11-383H13.1
MUC19	Mucin 19, oligomeric. Functions in ocular mucus homeostasis.
LRRC14	Leucine-rich repeat containing protein 14. Negatively regulates Toll-like receptor-mediated NF-kappa-B signaling by disrupting IKK core complex formation through interaction with IKBKB.
CDK14	Cyclin-dependent kinase 14. Regulator of cell cycle progression and cell proliferation.
POM121	Nuclear envelope pore membrane protein POM121. Essential component of the nuclear pore complex. Involved in anchoring components of the pore complex to the pore membrane.
PRIM2	DNA primase large subunit. Regulatory subunit of the DNA primase complex and component of the DNA polymerase alpha complex.
ARIH1	E3 ubiquitin-protein ligase. Catalyzes ubiquitination of target proteins together with ubiquitin-conjugating enzyme E2 UBE2L3.
MSH6	DNA mismatch repair protein Msh6. Component of the post-replicative DNA mismatch repair system.
DDI2	Protein DDI1 homolog 2. Acts as a proteasomal shuttle which links the proteasome and replication fork proteins. Assists in cell cycle progression after replication stress and maintains genome integrity.
PDHA1	Pyruvate dehydrogenase E1 component subunit alpha, somatic form, mitochondrial. The pyruvate dehydrogenase complex catalyzes the overall conversion of pyruvate to acetyl-CoA and CO2, and thereby links the glycolytic pathway to the tricarboxylic cycle.

## Sheet: Table S6
Table S6. Coding mutation frequency in IDH1-mutant or -wildtype oligodendroglioma patients.
Gene Name	IDH1-mutant Patient count	IDH1-mutant Patient ratio (out of 75)	IDH1-WT Patient count	IDH1-WT Patient ratio (out of 10)
IDH1	75	1	0	0
CIC	25	0.333333	2	0.2
PIK3CA	17	0.226667	0	0
TTN	13	0.173333	1	0.1
FUBP1	11	0.146667	1	0.1
MUC16	11	0.146667	1	0.1
NOTCH1	11	0.146667	0	0
RYR1	8	0.106667	0	0
ABCA13	7	0.0933333	0	0
IGSF10	6	0.08	1	0.1
NEB	6	0.08	0	0
SYNE1	6	0.08	2	0.2
EXPH5	5	0.0666667	1	0.1
FLG	5	0.0666667	0	0
MYO15A	5	0.0666667	2	0.2
PCLO	5	0.0666667	1	0.1
PLXNA1	5	0.0666667	0	0
SBF1	5	0.0666667	0	0
SLC6A3	5	0.0666667	1	0.1
TRPM1	5	0.0666667	1	0.1
ZBTB20	5	0.0666667	0	0
ABLIM2	4	0.0533333	0	0
ADAMTS9	4	0.0533333	0	0
AHNAK	4	0.0533333	0	0
AHNAK2	4	0.0533333	1	0.1
ANK3	4	0.0533333	0	0
AOC1	4	0.0533333	0	0
ATM	4	0.0533333	0	0
ATP10B	4	0.0533333	0	0
CACNA1D	4	0.0533333	0	0
CCDC80	4	0.0533333	0	0
CCNB3	4	0.0533333	0	0
CD163L1	4	0.0533333	0	0
CFAP46	4	0.0533333	0	0
COL2A1	4	0.0533333	1	0.1
COL7A1	4	0.0533333	0	0
CX3CR1	4	0.0533333	1	0.1
DGAT2	4	0.0533333	0	0
DISP2	4	0.0533333	0	0
DNAH5	4	0.0533333	0	0
DSG4	4	0.0533333	0	0
FAT1	4	0.0533333	1	0.1
FBN3	4	0.0533333	0	0
FGD5	4	0.0533333	0	0
GLIS3	4	0.0533333	0	0
HERC1	4	0.0533333	0	0
HIPK4	4	0.0533333	0	0
HIVEP3	4	0.0533333	0	0
HMCN1	4	0.0533333	0	0
HSD17B4	4	0.0533333	0	0
HUWE1	4	0.0533333	0	0
ITPR2	4	0.0533333	0	0
KCNH6	4	0.0533333	0	0
KIF1C	4	0.0533333	0	0
LRP2	4	0.0533333	0	0
MINAR1	4	0.0533333	0	0
MUC5B	4	0.0533333	0	0
MYH7B	4	0.0533333	0	0
N4BP2	4	0.0533333	0	0
NAV2	4	0.0533333	0	0
NBEAL2	4	0.0533333	0	0
NIPBL	4	0.0533333	0	0
NPR1	4	0.0533333	0	0
OR5J2	4	0.0533333	0	0
PITX3	4	0.0533333	1	0.1
PKHD1	4	0.0533333	0	0
PKHD1L1	4	0.0533333	0	0
PLXNB2	4	0.0533333	0	0
RAB11FIP5	4	0.0533333	0	0
RIF1	4	0.0533333	0	0
RP1	4	0.0533333	0	0
RYR2	4	0.0533333	0	0
SEC16A	4	0.0533333	0	0
SOAT1	4	0.0533333	0	0
STAB2	4	0.0533333	0	0
SYN1	4	0.0533333	0	0
TANC1	4	0.0533333	0	0
TANC2	4	0.0533333	0	0
THBS4	4	0.0533333	1	0.1
TMC6	4	0.0533333	0	0
TP53	4	0.0533333	0	0
TPR	4	0.0533333	1	0.1
XPO6	4	0.0533333	0	0
ABCA10	3	0.04	0	0
ABCC10	3	0.04	0	0
ABCC3	3	0.04	0	0
ADAM10	3	0.04	2	0.2
ADAM2	3	0.04	0	0
ADGRV1	3	0.04	0	0
ADNP	3	0.04	2	0.2
ADPGK	3	0.04	0	0
ALDH1A2	3	0.04	1	0.1
ALPK2	3	0.04	1	0.1
ANKRD12	3	0.04	0	0
ARHGAP39	3	0.04	0	0
ARID1A	3	0.04	0	0
ATP1A2	3	0.04	1	0.1
ATP2B4	3	0.04	0	0
ATRX	3	0.04	0	0
ATXN2	3	0.04	1	0.1
BCLAF1	3	0.04	0	0
BEND3	3	0.04	0	0
BIRC6	3	0.04	0	0
BOD1L1	3	0.04	1	0.1
BRAT1	3	0.04	0	0
CACNA1E	3	0.04	0	0
CACNA1S	3	0.04	0	0
CALN1	3	0.04	0	0
CARMIL2	3	0.04	0	0
CASP7	3	0.04	0	0
CCDC83	3	0.04	0	0
CDH6	3	0.04	0	0
CDT1	3	0.04	0	0
CEP152	3	0.04	0	0
CEP290	3	0.04	1	0.1
CEP55	3	0.04	0	0
CHD8	3	0.04	0	0
CLEC10A	3	0.04	0	0
CLK4	3	0.04	0	0
CNGA3	3	0.04	0	0
CNOT1	3	0.04	0	0
CNTNAP5	3	0.04	0	0
COL12A1	3	0.04	0	0
COL27A1	3	0.04	0	0
COL4A3	3	0.04	0	0
COL4A4	3	0.04	0	0
CORO7	3	0.04	0	0
CORO7-PAM16	3	0.04	0	0
CRYBG1	3	0.04	0	0
DCHS1	3	0.04	0	0
DDX6	3	0.04	0	0
DDX60	3	0.04	0	0
DES	3	0.04	0	0
DNAH6	3	0.04	0	0
DOCK11	3	0.04	0	0
DOCK6	3	0.04	0	0
DRP2	3	0.04	0	0
DSCAML1	3	0.04	0	0
DSPP	3	0.04	0	0
EIF3A	3	0.04	1	0.1
EML6	3	0.04	0	0
ETFDH	3	0.04	0	0
EVX2	3	0.04	0	0
FAT3	3	0.04	0	0
FBN1	3	0.04	0	0
FBXW10	3	0.04	0	0
FBXW7	3	0.04	0	0
FGD2	3	0.04	0	0
FMN2	3	0.04	0	0
FOXE1	3	0.04	0	0
FRAS1	3	0.04	0	0
FTMT	3	0.04	0	0
GABRB2	3	0.04	1	0.1
GPR179	3	0.04	0	0
GRID2IP	3	0.04	1	0.1
HAVCR2	3	0.04	0	0
HCAR3	3	0.04	0	0
HHAT	3	0.04	1	0.1
HMOX1	3	0.04	1	0.1
HNF1A	3	0.04	0	0
IGFN1	3	0.04	0	0
IGSF3	3	0.04	0	0
IL4R	3	0.04	0	0
INTS9	3	0.04	0	0
IRS2	3	0.04	2	0.2
ITGAM	3	0.04	0	0
ITGB8	3	0.04	0	0
KCNB2	3	0.04	0	0
KCNS1	3	0.04	1	0.1
KCNV2	3	0.04	0	0
KDM6B	3	0.04	0	0
KIAA1109	3	0.04	0	0
KIAA1614	3	0.04	0	0
KIF18B	3	0.04	0	0
KIF1A	3	0.04	0	0
KMT2C	3	0.04	0	0
KRT6A	3	0.04	1	0.1
LAMA3	3	0.04	0	0
LAMB1	3	0.04	0	0
LAMC3	3	0.04	1	0.1
LRBA	3	0.04	1	0.1
LRP4	3	0.04	0	0
LYST	3	0.04	0	0
LZTS3	3	0.04	0	0
MERTK	3	0.04	1	0.1
MSH6	3	0.04	0	0
MTUS1	3	0.04	0	0
MUC17	3	0.04	0	0
MUC3A	3	0.04	0	0
MUSK	3	0.04	1	0.1
MXRA5	3	0.04	0	0
MYH3	3	0.04	0	0
NAIP	3	0.04	0	0
NCDN	3	0.04	0	0
NEO1	3	0.04	0	0
NRIP1	3	0.04	0	0
NSD1	3	0.04	0	0
NWD1	3	0.04	0	0
OR1K1	3	0.04	0	0
OR52E2	3	0.04	0	0
OR9K2	3	0.04	0	0
PCDH8	3	0.04	0	0
PCNT	3	0.04	0	0
PDCD6IP	3	0.04	0	0
PDZD2	3	0.04	0	0
PHLDB1	3	0.04	0	0
PHLPP2	3	0.04	0	0
PITPNM2	3	0.04	0	0
PKD1L1	3	0.04	0	0
PLA2G6	3	0.04	0	0
PLK2	3	0.04	0	0
PLPP7	3	0.04	0	0
POU4F3	3	0.04	0	0
PPP1R15A	3	0.04	0	0
PRPF4B	3	0.04	0	0
PSG5	3	0.04	0	0
PTPRB	3	0.04	0	0
PTPRM	3	0.04	2	0.2
PTPRO	3	0.04	1	0.1
PUM1	3	0.04	0	0
RAB11FIP1	3	0.04	0	0
RAB40A	3	0.04	0	0
RAD51AP2	3	0.04	0	0
RBM11	3	0.04	0	0
RBMXL3	3	0.04	0	0
RBPJ	3	0.04	1	0.1
RELN	3	0.04	0	0
RGS22	3	0.04	0	0
RIN1	3	0.04	1	0.1
RNF216	3	0.04	1	0.1
RNPEPL1	3	0.04	0	0
RPRD2	3	0.04	0	0
RPTOR	3	0.04	1	0.1
RXFP3	3	0.04	0	0
SALL3	3	0.04	0	0
SCN10A	3	0.04	1	0.1
SCN3A	3	0.04	0	0
SCN8A	3	0.04	0	0
SECISBP2L	3	0.04	0	0
SERPINB13	3	0.04	0	0
SHANK1	3	0.04	0	0
SLC25A47	3	0.04	0	0
SLC26A3	3	0.04	1	0.1
SLC9A2	3	0.04	0	0
SMARCA4	3	0.04	1	0.1
SNAPC4	3	0.04	0	0
SOWAHB	3	0.04	1	0.1
SOX11	3	0.04	0	0
SPERT	3	0.04	0	0
SPHK2	3	0.04	0	0
STAG2	3	0.04	0	0
STARD9	3	0.04	0	0
STRA8	3	0.04	0	0
SYNPO2L	3	0.04	0	0
TBC1D4	3	0.04	0	0
TENM1	3	0.04	0	0
TESK2	3	0.04	0	0
TJP3	3	0.04	0	0
TLL1	3	0.04	0	0
TLR9	3	0.04	0	0
TNK2	3	0.04	0	0
TRO	3	0.04	0	0
TUT4	3	0.04	0	0
UBA7	3	0.04	0	0
UBP1	3	0.04	0	0
UGT2A1	3	0.04	0	0
UGT2A2	3	0.04	0	0
UNC5B	3	0.04	0	0
URB1	3	0.04	0	0
URB2	3	0.04	0	0
USH2A	3	0.04	0	0
USHBP1	3	0.04	0	0
WDR6	3	0.04	0	0
WDR61	3	0.04	0	0
ZFHX3	3	0.04	0	0
ZFP36L2	3	0.04	1	0.1
ZFPM2	3	0.04	0	0
ZMIZ1	3	0.04	0	0
ZNF23	3	0.04	0	0
ZNF280A	3	0.04	0	0
ZNF292	3	0.04	0	0
ZNF35	3	0.04	1	0.1
ZNF469	3	0.04	0	0
ZNF536	3	0.04	0	0
ZNF608	3	0.04	0	0
SEPT1	2	0.0266667	0	0
SEP15	2	0.0266667	0	0
AAK1	2	0.0266667	0	0
AANAT	2	0.0266667	0	0
AASS	2	0.0266667	0	0
AATF	2	0.0266667	1	0.1
AATK	2	0.0266667	0	0
ABCA1	2	0.0266667	0	0
ABCA2	2	0.0266667	0	0
ABCA3	2	0.0266667	0	0
ABCB4	2	0.0266667	0	0
ABCB6	2	0.0266667	1	0.1
ABCC8	2	0.0266667	0	0
ABCC9	2	0.0266667	1	0.1
ABHD12	2	0.0266667	1	0.1
ABHD12B	2	0.0266667	0	0
ABTB1	2	0.0266667	0	0
AC004381.6	2	0.0266667	0	0
ACAD8	2	0.0266667	0	0
ACADM	2	0.0266667	0	0
ACE	2	0.0266667	1	0.1
ACHE	2	0.0266667	0	0
ACLY	2	0.0266667	0	0
ACOX3	2	0.0266667	0	0
ACSL1	2	0.0266667	0	0
ACSL6	2	0.0266667	0	0
ACSM4	2	0.0266667	1	0.1
ACTL10	2	0.0266667	0	0
ACTL6B	2	0.0266667	0	0
ACTR3B	2	0.0266667	1	0.1
ADAM15	2	0.0266667	1	0.1
ADAM22	2	0.0266667	0	0
ADAM32	2	0.0266667	0	0
ADAMTS17	2	0.0266667	0	0
ADAMTS18	2	0.0266667	0	0
ADAMTS2	2	0.0266667	0	0
ADAMTS20	2	0.0266667	0	0
ADAMTS4	2	0.0266667	0	0
ADAMTSL4	2	0.0266667	0	0
ADAMTSL5	2	0.0266667	1	0.1
ADARB2	2	0.0266667	0	0
ADAT3	2	0.0266667	0	0
ADD2	2	0.0266667	0	0
ADGRA1	2	0.0266667	0	0
ADGRA3	2	0.0266667	0	0
ADGRB1	2	0.0266667	0	0
ADGRB3	2	0.0266667	0	0
ADGRG2	2	0.0266667	1	0.1
ADGRG6	2	0.0266667	0	0
ADORA2A	2	0.0266667	0	0
ADRA2B	2	0.0266667	0	0
AFAP1	2	0.0266667	0	0
AFAP1L1	2	0.0266667	0	0
AFF1	2	0.0266667	0	0
AFF2	2	0.0266667	0	0
AFTPH	2	0.0266667	0	0
AGAP2	2	0.0266667	0	0
AGBL5	2	0.0266667	0	0
AGFG2	2	0.0266667	0	0
AGPAT2	2	0.0266667	0	0
AGT	2	0.0266667	0	0
AGTPBP1	2	0.0266667	0	0
AHCYL1	2	0.0266667	0	0
AHR	2	0.0266667	0	0
AKAP12	2	0.0266667	0	0
AKAP13	2	0.0266667	0	0
AKAP2	2	0.0266667	0	0
AKAP4	2	0.0266667	0	0
AKAP6	2	0.0266667	0	0
AKAP9	2	0.0266667	0	0
AKNA	2	0.0266667	0	0
AKR1A1	2	0.0266667	0	0
AKR1C4	2	0.0266667	0	0
ALAS1	2	0.0266667	0	0
ALDH3B1	2	0.0266667	0	0
ALDH5A1	2	0.0266667	0	0
ALG8	2	0.0266667	0	0
ALKBH2	2	0.0266667	0	0
ALPL	2	0.0266667	0	0
ALS2	2	0.0266667	0	0
ALS2CL	2	0.0266667	0	0
AMACR	2	0.0266667	0	0
AMBRA1	2	0.0266667	0	0
AMMECR1L	2	0.0266667	0	0
AMOTL1	2	0.0266667	0	0
AMOTL2	2	0.0266667	0	0
AMPD3	2	0.0266667	0	0
AMPH	2	0.0266667	0	0
ANAPC2	2	0.0266667	0	0
ANAPC4	2	0.0266667	0	0
ANGEL1	2	0.0266667	0	0
ANGPTL1	2	0.0266667	0	0
ANK1	2	0.0266667	0	0
ANKHD1	2	0.0266667	1	0.1
ANKHD1-EIF4EBP3	2	0.0266667	0	0
ANKLE1	2	0.0266667	0	0
ANKMY1	2	0.0266667	0	0
ANKMY2	2	0.0266667	0	0
ANKRD13B	2	0.0266667	0	0
ANKRD13D	2	0.0266667	0	0
ANKRD35	2	0.0266667	0	0
ANKRD49	2	0.0266667	0	0
ANKS4B	2	0.0266667	0	0
ANO7	2	0.0266667	0	0
ANO8	2	0.0266667	0	0
AOX1	2	0.0266667	0	0
AP2M1	2	0.0266667	0	0
AP4B1	2	0.0266667	0	0
AP4E1	2	0.0266667	0	0
APAF1	2	0.0266667	0	0
APBA2	2	0.0266667	0	0
APBB3	2	0.0266667	0	0
APC	2	0.0266667	0	0
APC2	2	0.0266667	0	0
APEH	2	0.0266667	0	0
APOB	2	0.0266667	0	0
APOBR	2	0.0266667	0	0
APOF	2	0.0266667	0	0
APOL3	2	0.0266667	0	0
APOL4	2	0.0266667	0	0
APOL5	2	0.0266667	0	0
APOPT1	2	0.0266667	0	0
AQP10	2	0.0266667	0	0
ARAP1	2	0.0266667	0	0
ARAP3	2	0.0266667	0	0
ARFGEF1	2	0.0266667	0	0
ARG2	2	0.0266667	0	0
ARHGAP21	2	0.0266667	0	0
ARHGAP35	2	0.0266667	0	0
ARHGAP40	2	0.0266667	0	0
ARHGAP45	2	0.0266667	0	0
ARHGEF17	2	0.0266667	0	0
ARHGEF2	2	0.0266667	0	0
ARHGEF4	2	0.0266667	0	0
ARID1B	2	0.0266667	0	0
ARID5B	2	0.0266667	0	0
ARIH1	2	0.0266667	0	0
ARL8B	2	0.0266667	0	0
ARMC12	2	0.0266667	0	0
ARMCX5	2	0.0266667	0	0
ARNT	2	0.0266667	0	0
ARPC1A	2	0.0266667	0	0
ARPC2	2	0.0266667	0	0
ARRB1	2	0.0266667	0	0
ARSA	2	0.0266667	0	0
ARSH	2	0.0266667	0	0
ARSJ	2	0.0266667	0	0
ART1	2	0.0266667	0	0
ARVCF	2	0.0266667	0	0
ASAP1	2	0.0266667	0	0
ASB15	2	0.0266667	0	0
ASH1L	2	0.0266667	0	0
ASPA	2	0.0266667	0	0
ASTL	2	0.0266667	0	0
ASTN1	2	0.0266667	0	0
ASTN2	2	0.0266667	0	0
ASXL1	2	0.0266667	0	0
ATAD3A	2	0.0266667	0	0
ATF7IP	2	0.0266667	0	0
ATG2A	2	0.0266667	0	0
ATG5	2	0.0266667	0	0
ATP13A3	2	0.0266667	0	0
ATP1B4	2	0.0266667	0	0
ATP2A1	2	0.0266667	0	0
ATP2A2	2	0.0266667	0	0
ATP2B3	2	0.0266667	0	0
ATP6V0E2	2	0.0266667	0	0
ATP7B	2	0.0266667	0	0
ATP8A1	2	0.0266667	0	0
ATP8B1	2	0.0266667	0	0
AUH	2	0.0266667	0	0
AVPR2	2	0.0266667	0	0
AXIN1	2	0.0266667	0	0
AXL	2	0.0266667	0	0
B3GNT6	2	0.0266667	0	0
B3GNT9	2	0.0266667	0	0
B3GNTL1	2	0.0266667	0	0
B4GALNT1	2	0.0266667	0	0
BACE1	2	0.0266667	0	0
BAIAP2	2	0.0266667	0	0
BANK1	2	0.0266667	0	0
BARD1	2	0.0266667	0	0
BAZ2A	2	0.0266667	0	0
BBOX1	2	0.0266667	0	0
BBX	2	0.0266667	0	0
BCL2L10	2	0.0266667	0	0
BCL9L	2	0.0266667	0	0
BCORL1	2	0.0266667	0	0
BDNF	2	0.0266667	0	0
BET1L	2	0.0266667	0	0
BHLHB9	2	0.0266667	0	0
BHLHE22	2	0.0266667	0	0
BIN1	2	0.0266667	0	0
BLM	2	0.0266667	0	0
BMPR1A	2	0.0266667	0	0
BPIFB2	2	0.0266667	0	0
BPIFB4	2	0.0266667	0	0
BPTF	2	0.0266667	0	0
BRAF	2	0.0266667	0	0
BRCA1	2	0.0266667	0	0
BRD1	2	0.0266667	0	0
BRI3BP	2	0.0266667	0	0
BRMS1	2	0.0266667	0	0
BRWD3	2	0.0266667	0	0
BSN	2	0.0266667	0	0
BSPRY	2	0.0266667	0	0
BTBD2	2	0.0266667	0	0
BTLA	2	0.0266667	0	0
BTN1A1	2	0.0266667	0	0
BTN3A2	2	0.0266667	1	0.1
BTNL9	2	0.0266667	0	0
BUB1B	2	0.0266667	0	0
BZW1	2	0.0266667	0	0
C10orf67	2	0.0266667	0	0
C10orf90	2	0.0266667	0	0
C10orf95	2	0.0266667	0	0
C12orf10	2	0.0266667	0	0
C15orf39	2	0.0266667	0	0
C16orf86	2	0.0266667	0	0
C19orf38	2	0.0266667	1	0.1
C1orf159	2	0.0266667	0	0
C1QL4	2	0.0266667	0	0
C20orf202	2	0.0266667	0	0
C2CD2	2	0.0266667	0	0
C2orf16	2	0.0266667	0	0
C2orf40	2	0.0266667	0	0
C2orf78	2	0.0266667	0	0
C3	2	0.0266667	0	0
C5orf22	2	0.0266667	0	0
C7orf33	2	0.0266667	0	0
C9orf139	2	0.0266667	0	0
C9orf57	2	0.0266667	0	0
CA11	2	0.0266667	0	0
CABIN1	2	0.0266667	0	0
CABP4	2	0.0266667	0	0
CACNA1A	2	0.0266667	0	0
CACNA1C	2	0.0266667	0	0
CACNA2D1	2	0.0266667	0	0
CACNA2D3	2	0.0266667	0	0
CACTIN	2	0.0266667	0	0
CADM3	2	0.0266667	0	0
CALB2	2	0.0266667	0	0
CALCOCO2	2	0.0266667	0	0
CALR	2	0.0266667	0	0
CAMK2B	2	0.0266667	0	0
CAMK2G	2	0.0266667	0	0
CAMLG	2	0.0266667	0	0
CAMSAP2	2	0.0266667	0	0
CAMTA1	2	0.0266667	0	0
CAMTA2	2	0.0266667	0	0
CAND2	2	0.0266667	0	0
CAPN10	2	0.0266667	0	0
CAPN3	2	0.0266667	0	0
CARD10	2	0.0266667	0	0
CARD19	2	0.0266667	0	0
CARNS1	2	0.0266667	0	0
CASKIN1	2	0.0266667	0	0
CASS4	2	0.0266667	0	0
CAT	2	0.0266667	0	0
CATIP	2	0.0266667	0	0
CATSPERD	2	0.0266667	0	0
CAV1	2	0.0266667	0	0
CBFA2T2	2	0.0266667	0	0
CBLL2	2	0.0266667	0	0
CBX5	2	0.0266667	0	0
CBY3	2	0.0266667	0	0
CCDC116	2	0.0266667	0	0
CCDC13	2	0.0266667	0	0
CCDC136	2	0.0266667	0	0
CCDC137	2	0.0266667	0	0
CCDC14	2	0.0266667	0	0
CCDC150	2	0.0266667	0	0
CCDC151	2	0.0266667	0	0
CCDC157	2	0.0266667	0	0
CCDC168	2	0.0266667	0	0
CCDC180	2	0.0266667	0	0
CCDC190	2	0.0266667	0	0
CCDC27	2	0.0266667	0	0
CCDC39	2	0.0266667	0	0
CCDC50	2	0.0266667	0	0
CCDC51	2	0.0266667	0	0
CCDC68	2	0.0266667	0	0
CCDC71	2	0.0266667	0	0
CCDC85A	2	0.0266667	0	0
CCDC93	2	0.0266667	0	0
CCKBR	2	0.0266667	0	0
CCND1	2	0.0266667	0	0
CCNF	2	0.0266667	0	0
CCNH	2	0.0266667	0	0
CCNI	2	0.0266667	0	0
CCNL2	2	0.0266667	0	0
CCNT1	2	0.0266667	0	0
CCP110	2	0.0266667	0	0
CD164L2	2	0.0266667	0	0
CD19	2	0.0266667	0	0
CD2	2	0.0266667	0	0
CD22	2	0.0266667	0	0
CD244	2	0.0266667	0	0
CDAN1	2	0.0266667	0	0
CDC42BPB	2	0.0266667	0	0
CDC42EP3	2	0.0266667	0	0
CDC45	2	0.0266667	0	0
CDCA3	2	0.0266667	0	0
CDCP2	2	0.0266667	0	0
CDH1	2	0.0266667	0	0
CDH9	2	0.0266667	0	0
CDHR5	2	0.0266667	0	0
CDK10	2	0.0266667	0	0
CDK12	2	0.0266667	0	0
CDK18	2	0.0266667	0	0
CDK5R2	2	0.0266667	0	0
CDKAL1	2	0.0266667	0	0
CDKN1C	2	0.0266667	0	0
CDR2L	2	0.0266667	0	0
CDS2	2	0.0266667	0	0
CEACAM7	2	0.0266667	0	0
CECR2	2	0.0266667	0	0
CEL	2	0.0266667	0	0
CELA2A	2	0.0266667	0	0
CELA3A	2	0.0266667	0	0
CELSR3	2	0.0266667	0	0
CEMIP	2	0.0266667	0	0
CEMIP2	2	0.0266667	0	0
CENPB	2	0.0266667	0	0
CENPV	2	0.0266667	0	0
CEP128	2	0.0266667	0	0
CEP131	2	0.0266667	0	0
CEP162	2	0.0266667	0	0
CEP192	2	0.0266667	0	0
CEP250	2	0.0266667	0	0
CEP350	2	0.0266667	0	0
CEP68	2	0.0266667	0	0
CEP76	2	0.0266667	1	0.1
CEP89	2	0.0266667	0	0
CEP95	2	0.0266667	0	0
CFAP53	2	0.0266667	0	0
CFAP58	2	0.0266667	0	0
CHAD	2	0.0266667	0	0
CHAF1A	2	0.0266667	0	0
CHAF1B	2	0.0266667	0	0
CHAT	2	0.0266667	0	0
CHCHD4	2	0.0266667	0	0
CHCHD6	2	0.0266667	0	0
CHI3L2	2	0.0266667	0	0
CHMP2A	2	0.0266667	0	0
CHPF	2	0.0266667	0	0
CHPF2	2	0.0266667	0	0
CHRDL2	2	0.0266667	0	0
CHRNG	2	0.0266667	0	0
CHST15	2	0.0266667	0	0
CHST4	2	0.0266667	0	0
CHST5	2	0.0266667	0	0
CKB	2	0.0266667	0	0
CKMT2	2	0.0266667	0	0
CLASP1	2	0.0266667	0	0
CLCN2	2	0.0266667	0	0
CLDN1	2	0.0266667	0	0
CLDN11	2	0.0266667	0	0
CLDN23	2	0.0266667	0	0
CLEC4D	2	0.0266667	0	0
CLIC2	2	0.0266667	0	0
CLINT1	2	0.0266667	0	0
CLIP2	2	0.0266667	0	0
CLLU1OS	2	0.0266667	0	0
CLPTM1L	2	0.0266667	0	0
CLSTN3	2	0.0266667	0	0
CMTR1	2	0.0266667	0	0
CNGA1	2	0.0266667	0	0
CNGB3	2	0.0266667	0	0
CNKSR3	2	0.0266667	0	0
CNN3	2	0.0266667	0	0
CNP	2	0.0266667	0	0
CNTN4	2	0.0266667	0	0
COASY	2	0.0266667	0	0
COG1	2	0.0266667	0	0
COL15A1	2	0.0266667	0	0
COL1A1	2	0.0266667	0	0
COL1A2	2	0.0266667	0	0
COL22A1	2	0.0266667	0	0
COL24A1	2	0.0266667	0	0
COL25A1	2	0.0266667	0	0
COL28A1	2	0.0266667	0	0
COL4A5	2	0.0266667	0	0
COL4A6	2	0.0266667	0	0
COL5A1	2	0.0266667	0	0
COL5A3	2	0.0266667	0	0
COL6A3	2	0.0266667	0	0
COPE	2	0.0266667	0	0
COPS3	2	0.0266667	0	0
COPS6	2	0.0266667	0	0
COPS7A	2	0.0266667	0	0
COQ3	2	0.0266667	0	0
CPN2	2	0.0266667	0	0
CPNE5	2	0.0266667	0	0
CPXCR1	2	0.0266667	0	0
CPXM2	2	0.0266667	0	0
CR1L	2	0.0266667	0	0
CRACR2B	2	0.0266667	0	0
CRB2	2	0.0266667	0	0
CREBBP	2	0.0266667	0	0
CRY2	2	0.0266667	0	0
CS	2	0.0266667	0	0
CSAD	2	0.0266667	0	0
CSF1R	2	0.0266667	0	0
CSGALNACT2	2	0.0266667	0	0
CSHL1	2	0.0266667	0	0
CSRP3	2	0.0266667	0	0
CST5	2	0.0266667	0	0
CSTF2	2	0.0266667	0	0
CTAGE1	2	0.0266667	0	0
CTC1	2	0.0266667	0	0
CTCFL	2	0.0266667	0	0
CTDSPL	2	0.0266667	0	0
CTNS	2	0.0266667	0	0
CTSF	2	0.0266667	0	0
CTSV	2	0.0266667	0	0
CTSW	2	0.0266667	0	0
CTU1	2	0.0266667	0	0
CTXN3	2	0.0266667	0	0
CUL4B	2	0.0266667	0	0
CUX1	2	0.0266667	0	0
CXCR3	2	0.0266667	0	0
CXCR4	2	0.0266667	0	0
CXCR5	2	0.0266667	0	0
CXorf22	2	0.0266667	0	0
CYB5R4	2	0.0266667	0	0
CYP1A1	2	0.0266667	0	0
CYP2C9	2	0.0266667	0	0
CYP2D6	2	0.0266667	0	0
CYP3A4	2	0.0266667	0	0
CYP3A5	2	0.0266667	0	0
CYP4F12	2	0.0266667	0	0
DAAM1	2	0.0266667	0	0
DACH1	2	0.0266667	0	0
DACT1	2	0.0266667	0	0
DAG1	2	0.0266667	0	0
DALRD3	2	0.0266667	0	0
DAP3	2	0.0266667	0	0
DAPK2	2	0.0266667	0	0
DBF4	2	0.0266667	0	0
DBF4B	2	0.0266667	0	0
DCAF12	2	0.0266667	0	0
DCAF4L1	2	0.0266667	0	0
DCLRE1A	2	0.0266667	0	0
DCT	2	0.0266667	0	0
DCTN1	2	0.0266667	0	0
DCXR	2	0.0266667	0	0
DDC	2	0.0266667	0	0
DDIT4	2	0.0266667	0	0
DDN	2	0.0266667	0	0
DDX39A	2	0.0266667	0	0
DDX52	2	0.0266667	0	0
DDX54	2	0.0266667	0	0
DENND3	2	0.0266667	0	0
DGAT1	2	0.0266667	0	0
DGCR8	2	0.0266667	0	0
DGKD	2	0.0266667	0	0
DGKI	2	0.0266667	0	0
DGKQ	2	0.0266667	0	0
DHDDS	2	0.0266667	0	0
DHH	2	0.0266667	0	0
DHX57	2	0.0266667	0	0
DHX8	2	0.0266667	0	0
DIAPH1	2	0.0266667	0	0
DICER1	2	0.0266667	0	0
DIDO1	2	0.0266667	0	0
DIP2C	2	0.0266667	0	0
DIRAS3	2	0.0266667	0	0
DIS3L	2	0.0266667	0	0
DKC1	2	0.0266667	0	0
DKFZP761J1410	2	0.0266667	0	0
DKK3	2	0.0266667	0	0
DLG5	2	0.0266667	0	0
DLGAP2	2	0.0266667	0	0
DLX1	2	0.0266667	0	0
DLX5	2	0.0266667	0	0
DNAH1	2	0.0266667	0	0
DNAH10	2	0.0266667	0	0
DNAH17	2	0.0266667	0	0
DNAH3	2	0.0266667	0	0
DNAH8	2	0.0266667	0	0
DNAH9	2	0.0266667	0	0
DNAJC1	2	0.0266667	0	0
DNAJC14	2	0.0266667	0	0
DNAJC22	2	0.0266667	0	0
DNASE1L2	2	0.0266667	0	0
DNM2	2	0.0266667	0	0
DNMBP	2	0.0266667	0	0
DNMT3A	2	0.0266667	0	0
DNMT3B	2	0.0266667	0	0
DNTTIP1	2	0.0266667	0	0
DOCK10	2	0.0266667	0	0
DOCK8	2	0.0266667	0	0
DOCK9	2	0.0266667	1	0.1
DOK7	2	0.0266667	0	0
DOLPP1	2	0.0266667	0	0
DOP1A	2	0.0266667	0	0
DOT1L	2	0.0266667	0	0
DPF2	2	0.0266667	0	0
DPP8	2	0.0266667	0	0
DPYSL5	2	0.0266667	0	0
DRD1	2	0.0266667	0	0
DROSHA	2	0.0266667	0	0
DSCAM	2	0.0266667	0	0
DSEL	2	0.0266667	0	0
DUS1L	2	0.0266667	0	0
DYNC1H1	2	0.0266667	0	0
DYNC1I2	2	0.0266667	0	0
DYNLT1	2	0.0266667	0	0
DYRK4	2	0.0266667	0	0
DYSF	2	0.0266667	0	0
DZANK1	2	0.0266667	0	0
E2F8	2	0.0266667	0	0
E4F1	2	0.0266667	0	0
ECE1	2	0.0266667	0	0
ECE2	2	0.0266667	0	0
ECPAS	2	0.0266667	0	0
ECT2	2	0.0266667	0	0
EDEM1	2	0.0266667	0	0
EDEM3	2	0.0266667	0	0
EEF1D	2	0.0266667	0	0
EFCAB1	2	0.0266667	0	0
EFCAB3	2	0.0266667	0	0
EFCAB6	2	0.0266667	0	0
EGFL6	2	0.0266667	0	0
EHD1	2	0.0266667	0	0
EI24	2	0.0266667	0	0
EIF2B5	2	0.0266667	0	0
EIF2S3	2	0.0266667	0	0
EIF3B	2	0.0266667	0	0
EIF3K	2	0.0266667	0	0
EIF4B	2	0.0266667	0	0
EIF4G3	2	0.0266667	0	0
ELL3	2	0.0266667	0	0
ELMOD1	2	0.0266667	0	0
EMILIN1	2	0.0266667	0	0
EML4	2	0.0266667	0	0
EMSY	2	0.0266667	0	0
ENDOV	2	0.0266667	0	0
ENKUR	2	0.0266667	0	0
ENO4	2	0.0266667	0	0
ENOX1	2	0.0266667	0	0
ENPP2	2	0.0266667	0	0
ENPP3	2	0.0266667	0	0
ENTPD4	2	0.0266667	0	0
ENTPD5	2	0.0266667	0	0
EPAS1	2	0.0266667	0	0
EPB41L4B	2	0.0266667	0	0
EPDR1	2	0.0266667	0	0
EPG5	2	0.0266667	0	0
EPHA10	2	0.0266667	0	0
EPHB3	2	0.0266667	0	0
EPHB6	2	0.0266667	0	0
EPHX3	2	0.0266667	0	0
EPHX4	2	0.0266667	0	0
EPPK1	2	0.0266667	0	0
EPS15	2	0.0266667	0	0
ERAL1	2	0.0266667	0	0
ERBB2	2	0.0266667	0	0
ERBB3	2	0.0266667	0	0
ERBB4	2	0.0266667	0	0
ERCC3	2	0.0266667	0	0
ERICH6B	2	0.0266667	0	0
ERRFI1	2	0.0266667	0	0
ESCO1	2	0.0266667	0	0
ESPL1	2	0.0266667	0	0
ESPNL	2	0.0266667	0	0
ESRP2	2	0.0266667	0	0
ESX1	2	0.0266667	0	0
ESYT3	2	0.0266667	0	0
ETS2	2	0.0266667	0	0
ETV1	2	0.0266667	0	0
ETV5	2	0.0266667	0	0
EVC	2	0.0266667	0	0
EXD3	2	0.0266667	0	0
EXOC5	2	0.0266667	0	0
EXOC7	2	0.0266667	0	0
EXTL2	2	0.0266667	0	0
F11	2	0.0266667	0	0
F13A1	2	0.0266667	0	0
F2R	2	0.0266667	0	0
F5	2	0.0266667	0	0
F8	2	0.0266667	0	0
FAAP100	2	0.0266667	0	0
FABP5	2	0.0266667	0	0
FAM110C	2	0.0266667	0	0
FAM114A1	2	0.0266667	0	0
FAM120A	2	0.0266667	0	0
FAM120AOS	2	0.0266667	0	0
FAM129B	2	0.0266667	0	0
FAM135A	2	0.0266667	0	0
FAM135B	2	0.0266667	0	0
FAM160A2	2	0.0266667	0	0
FAM178B	2	0.0266667	0	0
FAM186A	2	0.0266667	0	0
FAM186B	2	0.0266667	0	0
FAM200A	2	0.0266667	0	0
FAM20C	2	0.0266667	0	0
FAM219A	2	0.0266667	0	0
FAM221B	2	0.0266667	0	0
FAM3A	2	0.0266667	0	0
FAM3D	2	0.0266667	0	0
FAM47A	2	0.0266667	0	0
FAM53A	2	0.0266667	0	0
FAM71A	2	0.0266667	0	0
FAM71B	2	0.0266667	0	0
FAM81A	2	0.0266667	0	0
FAM83B	2	0.0266667	0	0
FAM84A	2	0.0266667	0	0
FAM91A1	2	0.0266667	0	0
FAM92B	2	0.0266667	0	0
FANCC	2	0.0266667	0	0
FANCD2	2	0.0266667	0	0
FANCI	2	0.0266667	0	0
FARP2	2	0.0266667	0	0
FAT4	2	0.0266667	0	0
FBF1	2	0.0266667	0	0
FBH1	2	0.0266667	0	0
FBLN1	2	0.0266667	0	0
FBXL13	2	0.0266667	0	0
FBXL5	2	0.0266667	0	0
FBXL7	2	0.0266667	0	0
FBXO11	2	0.0266667	0	0
FBXO15	2	0.0266667	0	0
FBXO38	2	0.0266667	0	0
FBXO40	2	0.0266667	0	0
FBXO46	2	0.0266667	0	0
FCGR2A	2	0.0266667	0	0
FCHSD1	2	0.0266667	0	0
FCRLB	2	0.0266667	0	0
FERMT3	2	0.0266667	0	0
FEZF2	2	0.0266667	0	0
FGF18	2	0.0266667	0	0
FGFBP2	2	0.0266667	0	0
FGFBP3	2	0.0266667	0	0
FHL1	2	0.0266667	0	0
FHOD3	2	0.0266667	0	0
FICD	2	0.0266667	0	0
FLAD1	2	0.0266667	0	0
FLII	2	0.0266667	0	0
FLNC	2	0.0266667	0	0
FLYWCH1	2	0.0266667	0	0
FMNL2	2	0.0266667	0	0
FMNL3	2	0.0266667	1	0.1
FNDC3B	2	0.0266667	0	0
FOCAD	2	0.0266667	0	0
FOXB1	2	0.0266667	0	0
FOXE3	2	0.0266667	0	0
FOXJ1	2	0.0266667	0	0
FOXK1	2	0.0266667	0	0
FOXM1	2	0.0266667	0	0
FOXN4	2	0.0266667	0	0
FOXO4	2	0.0266667	0	0
FPR2	2	0.0266667	0	0
FREM3	2	0.0266667	0	0
FRMPD3	2	0.0266667	0	0
FRY	2	0.0266667	0	0
FUT3	2	0.0266667	0	0
FXR2	2	0.0266667	0	0
FXYD6	2	0.0266667	0	0
FXYD6-FXYD2	2	0.0266667	0	0
FZD9	2	0.0266667	0	0
FZR1	2	0.0266667	0	0
GAB3	2	0.0266667	0	0
GAB4	2	0.0266667	0	0
GADL1	2	0.0266667	0	0
GALC	2	0.0266667	0	0
GALNT11	2	0.0266667	0	0
GALNT3	2	0.0266667	0	0
GANAB	2	0.0266667	0	0
GANC	2	0.0266667	0	0
GAR1	2	0.0266667	0	0
GAREM2	2	0.0266667	0	0
GAS8	2	0.0266667	0	0
GATAD2A	2	0.0266667	0	0
GCFC2	2	0.0266667	0	0
GDF9	2	0.0266667	0	0
GEM	2	0.0266667	0	0
GEMIN5	2	0.0266667	0	0
GFM1	2	0.0266667	0	0
GGA1	2	0.0266667	0	0
GINS3	2	0.0266667	0	0
GIT2	2	0.0266667	0	0
GJA3	2	0.0266667	0	0
GLG1	2	0.0266667	0	0
GLI3	2	0.0266667	0	0
GLI4	2	0.0266667	0	0
GLIPR1	2	0.0266667	0	0
GLP1R	2	0.0266667	0	0
GLRA3	2	0.0266667	0	0
GMIP	2	0.0266667	0	0
GMPR	2	0.0266667	0	0
GNA15	2	0.0266667	0	0
GNPNAT1	2	0.0266667	0	0
GOLGB1	2	0.0266667	0	0
GOT1L1	2	0.0266667	0	0
GP1BA	2	0.0266667	0	0
GPAM	2	0.0266667	0	0
GPKOW	2	0.0266667	0	0
GPR137C	2	0.0266667	0	0
GPR149	2	0.0266667	0	0
GPR151	2	0.0266667	0	0
GPR17	2	0.0266667	0	0
GPR182	2	0.0266667	0	0
GPR19	2	0.0266667	0	0
GPR3	2	0.0266667	0	0
GPR37	2	0.0266667	0	0
GPR50	2	0.0266667	0	0
GPR52	2	0.0266667	0	0
GPR68	2	0.0266667	0	0
GPR89B	2	0.0266667	0	0
GPRC5A	2	0.0266667	0	0
GPRC5B	2	0.0266667	0	0
GPS2	2	0.0266667	0	0
GRAMD2A	2	0.0266667	0	0
GRIA3	2	0.0266667	0	0
GRIA4	2	0.0266667	0	0
GRIN2A	2	0.0266667	0	0
GRIN2C	2	0.0266667	0	0
GRINA	2	0.0266667	0	0
GRK4	2	0.0266667	0	0
GRK5	2	0.0266667	0	0
GRM1	2	0.0266667	0	0
GRM4	2	0.0266667	0	0
GRSF1	2	0.0266667	0	0
GRTP1	2	0.0266667	0	0
GRWD1	2	0.0266667	0	0
GSDMD	2	0.0266667	0	0
GSDME	2	0.0266667	0	0
GSTP1	2	0.0266667	0	0
GTF2A1L	2	0.0266667	1	0.1
GTF2IRD1	2	0.0266667	0	0
GTF3C1	2	0.0266667	0	0
GTF3C2	2	0.0266667	0	0
GTF3C4	2	0.0266667	0	0
GTSE1	2	0.0266667	0	0
GUCY1B1	2	0.0266667	0	0
GUCY2D	2	0.0266667	0	0
GYS2	2	0.0266667	0	0
H1FOO	2	0.0266667	0	0
H2AFY2	2	0.0266667	0	0
HACE1	2	0.0266667	0	0
HAUS2	2	0.0266667	0	0
HAUS8	2	0.0266667	0	0
HCST	2	0.0266667	0	0
HDAC2	2	0.0266667	0	0
HDGF	2	0.0266667	0	0
HECTD1	2	0.0266667	0	0
HECTD4	2	0.0266667	0	0
HECW2	2	0.0266667	0	0
HELLS	2	0.0266667	0	0
HELZ2	2	0.0266667	0	0
HEMGN	2	0.0266667	0	0
HEPHL1	2	0.0266667	0	0
HERC2	2	0.0266667	0	0
HERC4	2	0.0266667	0	0
HEXIM2	2	0.0266667	0	0
HEYL	2	0.0266667	0	0
HFE	2	0.0266667	0	0
HIP1	2	0.0266667	0	0
HIPK1	2	0.0266667	0	0
HIPK2	2	0.0266667	0	0
HIRA	2	0.0266667	0	0
HIST1H4B	2	0.0266667	0	0
HIST1H4F	2	0.0266667	0	0
HIST2H3D	2	0.0266667	0	0
HIVEP1	2	0.0266667	0	0
HIVEP2	2	0.0266667	0	0
HKDC1	2	0.0266667	0	0
HLCS	2	0.0266667	0	0
HMCES	2	0.0266667	0	0
HMG20B	2	0.0266667	0	0
HMMR	2	0.0266667	0	0
HMX3	2	0.0266667	0	0
HNRNPA0	2	0.0266667	0	0
HNRNPDL	2	0.0266667	0	0
HNRNPH2	2	0.0266667	0	0
HORMAD1	2	0.0266667	0	0
HORMAD2	2	0.0266667	0	0
HOXA13	2	0.0266667	0	0
HOXA9	2	0.0266667	0	0
HOXC13	2	0.0266667	0	0
HPDL	2	0.0266667	0	0
HPS5	2	0.0266667	0	0
HS3ST1	2	0.0266667	0	0
HSD11B2	2	0.0266667	0	0
HSF1	2	0.0266667	0	0
HSF5	2	0.0266667	0	0
HSP90AB1	2	0.0266667	0	0
HSPA12A	2	0.0266667	0	0
HSPA2	2	0.0266667	0	0
HSPA4	2	0.0266667	0	0
HSPG2	2	0.0266667	0	0
HTR1B	2	0.0266667	0	0
HTR5A	2	0.0266667	0	0
HTRA1	2	0.0266667	0	0
HTRA3	2	0.0266667	0	0
HTT	2	0.0266667	0	0
HYKK	2	0.0266667	0	0
HYOU1	2	0.0266667	0	0
IARS	2	0.0266667	0	0
ICAM1	2	0.0266667	0	0
ICAM4	2	0.0266667	0	0
ICAM5	2	0.0266667	0	0
ICE1	2	0.0266667	0	0
IFIH1	2	0.0266667	0	0
IFIT2	2	0.0266667	0	0
IFITM3	2	0.0266667	0	0
IFNGR1	2	0.0266667	0	0
IFRD1	2	0.0266667	0	0
IFT122	2	0.0266667	0	0
IFT46	2	0.0266667	0	0
IGDCC4	2	0.0266667	0	0
IGF2BP2	2	0.0266667	0	0
IGFBP2	2	0.0266667	0	0
IGSF9B	2	0.0266667	0	0
IHH	2	0.0266667	0	0
IL17RC	2	0.0266667	0	0
IL17RD	2	0.0266667	0	0
IL20	2	0.0266667	0	0
IL20RA	2	0.0266667	0	0
IL21R	2	0.0266667	0	0
IL22RA1	2	0.0266667	0	0
ILF3	2	0.0266667	0	0
ILVBL	2	0.0266667	0	0
IMPACT	2	0.0266667	0	0
INA	2	0.0266667	0	0
INCENP	2	0.0266667	0	0
INHBA	2	0.0266667	0	0
INMT	2	0.0266667	0	0
INPP4A	2	0.0266667	0	0
INPP4B	2	0.0266667	0	0
INPPL1	2	0.0266667	0	0
INSR	2	0.0266667	0	0
INSYN2	2	0.0266667	0	0
INTS1	2	0.0266667	0	0
INTS12	2	0.0266667	0	0
IPCEF1	2	0.0266667	0	0
IPO11	2	0.0266667	0	0
IQCG	2	0.0266667	0	0
IQCH	2	0.0266667	0	0
IQGAP3	2	0.0266667	0	0
IRF3	2	0.0266667	0	0
IRF4	2	0.0266667	0	0
IRS1	2	0.0266667	0	0
ITFG2	2	0.0266667	0	0
ITGA3	2	0.0266667	0	0
ITGA7	2	0.0266667	0	0
ITGA9	2	0.0266667	0	0
ITGAX	2	0.0266667	0	0
ITGB4	2	0.0266667	0	0
ITIH4	2	0.0266667	0	0
ITPRID2	2	0.0266667	0	0
ITPRIPL1	2	0.0266667	0	0
ITSN1	2	0.0266667	0	0
ITSN2	2	0.0266667	0	0
IVNS1ABP	2	0.0266667	0	0
IWS1	2	0.0266667	0	0
JAK1	2	0.0266667	0	0
JAK2	2	0.0266667	0	0
JAKMIP3	2	0.0266667	0	0
JCAD	2	0.0266667	0	0
JHY	2	0.0266667	0	0
JMJD1C	2	0.0266667	0	0
JMY	2	0.0266667	0	0
JPH1	2	0.0266667	0	0
JPH2	2	0.0266667	0	0
JPH3	2	0.0266667	0	0
KANK4	2	0.0266667	0	0
KBTBD12	2	0.0266667	0	0
KBTBD2	2	0.0266667	0	0
KBTBD4	2	0.0266667	0	0
KBTBD6	2	0.0266667	0	0
KCNAB1	2	0.0266667	0	0
KCNH4	2	0.0266667	0	0
KCNH5	2	0.0266667	0	0
KCNJ3	2	0.0266667	0	0
KCNJ8	2	0.0266667	0	0
KCNK10	2	0.0266667	0	0
KCNK16	2	0.0266667	0	0
KCNK2	2	0.0266667	0	0
KCNV1	2	0.0266667	0	0
KCTD19	2	0.0266667	1	0.1
KCTD21	2	0.0266667	0	0
KDM1A	2	0.0266667	0	0
KDM1B	2	0.0266667	1	0.1
KDM2A	2	0.0266667	0	0
KDM2B	2	0.0266667	0	0
KDM4A	2	0.0266667	0	0
KDM4B	2	0.0266667	0	0
KDM5A	2	0.0266667	0	0
KDM5C	2	0.0266667	0	0
KHK	2	0.0266667	0	0
KHNYN	2	0.0266667	0	0
KIAA0040	2	0.0266667	0	0
KIAA0100	2	0.0266667	0	0
KIAA0232	2	0.0266667	0	0
KIAA1147	2	0.0266667	0	0
KIAA1210	2	0.0266667	0	0
KIAA1211	2	0.0266667	0	0
KIAA1549	2	0.0266667	0	0
KIAA1549L	2	0.0266667	0	0
KIAA1755	2	0.0266667	0	0
KIDINS220	2	0.0266667	0	0
KIF5A	2	0.0266667	0	0
KIF5C	2	0.0266667	0	0
KIFC2	2	0.0266667	0	0
KIFC3	2	0.0266667	0	0
KIRREL3	2	0.0266667	0	0
KLC1	2	0.0266667	0	0
KLF1	2	0.0266667	0	0
KLF11	2	0.0266667	0	0
KLHDC4	2	0.0266667	0	0
KLHL11	2	0.0266667	0	0
KLHL12	2	0.0266667	0	0
KLHL28	2	0.0266667	0	0
KLHL33	2	0.0266667	0	0
KLHL42	2	0.0266667	0	0
KLK12	2	0.0266667	0	0
KLLN	2	0.0266667	0	0
KMT2A	2	0.0266667	0	0
KMT2E	2	0.0266667	0	0
KNL1	2	0.0266667	0	0
KRCC1	2	0.0266667	0	0
KRT15	2	0.0266667	0	0
KRT32	2	0.0266667	0	0
KRT4	2	0.0266667	0	0
KRT75	2	0.0266667	0	0
KRT76	2	0.0266667	0	0
KRTAP12-2	2	0.0266667	0	0
KRTAP3-3	2	0.0266667	0	0
KRTAP5-4	2	0.0266667	0	0
KSR2	2	0.0266667	0	0
L3MBTL2	2	0.0266667	0	0
LAMA1	2	0.0266667	0	0
LAMA4	2	0.0266667	0	0
LAMA5	2	0.0266667	0	0
LAMB3	2	0.0266667	0	0
LAMB4	2	0.0266667	0	0
LAMC1	2	0.0266667	0	0
LARP1B	2	0.0266667	0	0
LCOR	2	0.0266667	0	0
LCP1	2	0.0266667	0	0
LENEP	2	0.0266667	0	0
LGALS3BP	2	0.0266667	0	0
LGI2	2	0.0266667	0	0
LGR6	2	0.0266667	0	0
LHX1	2	0.0266667	0	0
LIG3	2	0.0266667	0	0
LILRA5	2	0.0266667	0	0
LIMK2	2	0.0266667	0	0
LIN28B	2	0.0266667	0	0
LINC01599	2	0.0266667	0	0
LIPE	2	0.0266667	0	0
LMNA	2	0.0266667	0	0
LMO7DN	2	0.0266667	0	0
LMX1B	2	0.0266667	0	0
LONP1	2	0.0266667	1	0.1
LONRF1	2	0.0266667	0	0
LOXHD1	2	0.0266667	0	0
LOXL2	2	0.0266667	0	0
LOXL4	2	0.0266667	0	0
LPA	2	0.0266667	0	0
LPCAT1	2	0.0266667	0	0
LPIN1	2	0.0266667	0	0
LPP	2	0.0266667	0	0
LPPR4	2	0.0266667	0	0
LPXN	2	0.0266667	0	0
LRCH4	2	0.0266667	0	0
LRFN2	2	0.0266667	0	0
LRFN4	2	0.0266667	0	0
LRMP	2	0.0266667	0	0
LRP10	2	0.0266667	0	0
LRP1B	2	0.0266667	0	0
LRRC23	2	0.0266667	0	0
LRRC34	2	0.0266667	0	0
LRRC4	2	0.0266667	0	0
LRRC41	2	0.0266667	0	0
LRRC8E	2	0.0266667	0	0
LRRIQ3	2	0.0266667	0	0
LRRK1	2	0.0266667	0	0
LRRK2	2	0.0266667	0	0
LRRTM2	2	0.0266667	0	0
LRRTM4	2	0.0266667	0	0
LSM14B	2	0.0266667	0	0
LTF	2	0.0266667	0	0
LTN1	2	0.0266667	0	0
LY6E	2	0.0266667	0	0
LZTFL1	2	0.0266667	0	0
MAG	2	0.0266667	0	0
MAGED1	2	0.0266667	0	0
MAN1A1	2	0.0266667	0	0
MAN2B2	2	0.0266667	0	0
MANEAL	2	0.0266667	0	0
MAP10	2	0.0266667	0	0
MAP1S	2	0.0266667	0	0
MAP2	2	0.0266667	0	0
MAP2K5	2	0.0266667	0	0
MAP3K13	2	0.0266667	0	0
MAP3K8	2	0.0266667	0	0
MAP4K4	2	0.0266667	0	0
MAP7D3	2	0.0266667	0	0
MAPK8IP2	2	0.0266667	0	0
MAPK8IP3	2	0.0266667	0	0
MAPK9	2	0.0266667	0	0
MAPKAPK2	2	0.0266667	0	0
MAPKBP1	2	0.0266667	0	0
MARF1	2	0.0266667	0	0
MARVELD3	2	0.0266667	0	0
MAS1	2	0.0266667	0	0
MAST2	2	0.0266667	0	0
MBD1	2	0.0266667	0	0
MBD3	2	0.0266667	0	0
MBD4	2	0.0266667	1	0.1
MBD5	2	0.0266667	0	0
MBNL1	2	0.0266667	0	0
MCM3AP	2	0.0266667	0	0
MCM7	2	0.0266667	0	0
MCUB	2	0.0266667	0	0
MDM1	2	0.0266667	0	0
MECOM	2	0.0266667	0	0
MED15	2	0.0266667	0	0
MED17	2	0.0266667	0	0
MED6	2	0.0266667	0	0
MEF2A	2	0.0266667	0	0
MEF2D	2	0.0266667	0	0
MEGF10	2	0.0266667	0	0
MEI1	2	0.0266667	0	0
MEN1	2	0.0266667	0	0
MEP1B	2	0.0266667	0	0
METTL3	2	0.0266667	0	0
METTL8	2	0.0266667	0	0
MFF	2	0.0266667	0	0
MFN1	2	0.0266667	0	0
MFSD1	2	0.0266667	0	0
MGAM	2	0.0266667	0	0
MGAT1	2	0.0266667	0	0
MGAT2	2	0.0266667	0	0
MGAT3	2	0.0266667	0	0
MGAT4B	2	0.0266667	0	0
MIA2	2	0.0266667	0	0
MICALCL	2	0.0266667	0	0
MICU2	2	0.0266667	0	0
MINK1	2	0.0266667	0	0
MIR1-1HG	2	0.0266667	0	0
MKRN2	2	0.0266667	0	0
MLXIPL	2	0.0266667	0	0
MLYCD	2	0.0266667	0	0
MMP20	2	0.0266667	0	0
MMP7	2	0.0266667	0	0
MMP8	2	0.0266667	0	0
MMS22L	2	0.0266667	0	0
MNAT1	2	0.0266667	0	0
MOGS	2	0.0266667	0	0
MORN1	2	0.0266667	0	0
MPO	2	0.0266667	0	0
MPP6	2	0.0266667	0	0
MRC2	2	0.0266667	0	0
MRGPRG	2	0.0266667	0	0
MRM1	2	0.0266667	0	0
MROH6	2	0.0266667	0	0
MRPL15	2	0.0266667	0	0
MRPL27	2	0.0266667	0	0
MRPL32	2	0.0266667	0	0
MRPL45	2	0.0266667	0	0
MRPL57	2	0.0266667	0	0
MRPS18A	2	0.0266667	0	0
MRPS7	2	0.0266667	0	0
MRTFA	2	0.0266667	0	0
MSANTD3-TMEFF1	2	0.0266667	0	0
MSL3	2	0.0266667	0	0
MST1	2	0.0266667	0	0
MST1R	2	0.0266667	0	0
MTBP	2	0.0266667	0	0
MTCH1	2	0.0266667	0	0
MTNR1B	2	0.0266667	0	0
MTOR	2	0.0266667	0	0
MUC4	2	0.0266667	0	0
MUL1	2	0.0266667	0	0
MX1	2	0.0266667	0	0
MXD1	2	0.0266667	0	0
MYBBP1A	2	0.0266667	0	0
MYBL2	2	0.0266667	0	0
MYCN	2	0.0266667	0	0
MYEF2	2	0.0266667	1	0.1
MYH10	2	0.0266667	0	0
MYH13	2	0.0266667	0	0
MYH2	2	0.0266667	0	0
MYLK2	2	0.0266667	0	0
MYO16	2	0.0266667	0	0
MYO19	2	0.0266667	0	0
MYO1F	2	0.0266667	0	0
MYO1G	2	0.0266667	0	0
MYO3B	2	0.0266667	0	0
MYOCD	2	0.0266667	0	0
MYOM2	2	0.0266667	0	0
MZB1	2	0.0266667	0	0
NAA80	2	0.0266667	0	0
NAB2	2	0.0266667	0	0
NACA	2	0.0266667	0	0
NALCN	2	0.0266667	0	0
NAP1L2	2	0.0266667	0	0
NAT10	2	0.0266667	0	0
NAT16	2	0.0266667	0	0
NAV1	2	0.0266667	0	0
NBAS	2	0.0266667	0	0
NCBP3	2	0.0266667	0	0
NCKAP5	2	0.0266667	0	0
NCOR1	2	0.0266667	0	0
NDNF	2	0.0266667	0	0
NDST3	2	0.0266667	0	0
NDUFV1	2	0.0266667	0	0
NECAP2	2	0.0266667	0	0
NEDD4L	2	0.0266667	0	0
NEFH	2	0.0266667	0	0
NEK1	2	0.0266667	0	0
NEK6	2	0.0266667	0	0
NEK8	2	0.0266667	0	0
NEURL1B	2	0.0266667	0	0
NEURL4	2	0.0266667	0	0
NEUROD1	2	0.0266667	0	0
NFE2L2	2	0.0266667	0	0
NFIA	2	0.0266667	0	0
NFRKB	2	0.0266667	0	0
NFXL1	2	0.0266667	0	0
NGRN	2	0.0266667	0	0
NHEJ1	2	0.0266667	0	0
NHLRC4	2	0.0266667	0	0
NHS	2	0.0266667	0	0
NID2	2	0.0266667	0	0
NINJ1	2	0.0266667	0	0
NINL	2	0.0266667	0	0
NLGN3	2	0.0266667	0	0
NLRP10	2	0.0266667	0	0
NLRP8	2	0.0266667	0	0
NLRP9	2	0.0266667	0	0
NME8	2	0.0266667	0	0
NMUR2	2	0.0266667	0	0
NOD1	2	0.0266667	0	0
NOD2	2	0.0266667	0	0
NOL8	2	0.0266667	0	0
NOS2	2	0.0266667	0	0
NOTCH4	2	0.0266667	0	0
NOXO1	2	0.0266667	0	0
NPAS3	2	0.0266667	0	0
NPFFR1	2	0.0266667	0	0
NPRL2	2	0.0266667	0	0
NR3C2	2	0.0266667	0	0
NR5A1	2	0.0266667	0	0
NR5A2	2	0.0266667	0	0
NRAP	2	0.0266667	0	0
NRAS	2	0.0266667	0	0
NRDE2	2	0.0266667	0	0
NRK	2	0.0266667	0	0
NRP1	2	0.0266667	0	0
NRP2	2	0.0266667	0	0
NRXN1	2	0.0266667	0	0
NSUN3	2	0.0266667	0	0
NT5E	2	0.0266667	0	0
NUBP1	2	0.0266667	0	0
NUDT21	2	0.0266667	0	0
NUDT22	2	0.0266667	0	0
NUMB	2	0.0266667	0	0
NUP98	2	0.0266667	0	0
NUPL2	2	0.0266667	0	0
NWD2	2	0.0266667	0	0
NYAP1	2	0.0266667	0	0
OAZ2	2	0.0266667	0	0
OCRL	2	0.0266667	0	0
OGDH	2	0.0266667	0	0
OIT3	2	0.0266667	0	0
OLFM1	2	0.0266667	0	0
OLFM2	2	0.0266667	0	0
OLFML1	2	0.0266667	0	0
OLFML3	2	0.0266667	0	0
OPLAH	2	0.0266667	0	0
OPRD1	2	0.0266667	0	0
OR10P1	2	0.0266667	1	0.1
OR10V1	2	0.0266667	0	0
OR10Z1	2	0.0266667	0	0
OR13C4	2	0.0266667	0	0
OR1L1	2	0.0266667	0	0
OR2A5	2	0.0266667	0	0
OR2B2	2	0.0266667	0	0
OR2C3	2	0.0266667	0	0
OR2V2	2	0.0266667	0	0
OR4C3	2	0.0266667	0	0
OR4D10	2	0.0266667	0	0
OR4D2	2	0.0266667	0	0
OR4K14	2	0.0266667	0	0
OR52K2	2	0.0266667	0	0
OR5AU1	2	0.0266667	0	0
OR5B21	2	0.0266667	0	0
OR5H15	2	0.0266667	0	0
OR5I1	2	0.0266667	0	0
OR6B2	2	0.0266667	0	0
OR6B3	2	0.0266667	0	0
OR6C6	2	0.0266667	0	0
OR6C70	2	0.0266667	0	0
OR6F1	2	0.0266667	0	0
OR8H3	2	0.0266667	0	0
OR9G1	2	0.0266667	0	0
OSBP2	2	0.0266667	0	0
OSCP1	2	0.0266667	0	0
OSGEPL1	2	0.0266667	0	0
OTUD6A	2	0.0266667	0	0
OTX2	2	0.0266667	0	0
OVCH1	2	0.0266667	0	0
OVOL1	2	0.0266667	0	0
OXR1	2	0.0266667	0	0
P2RX3	2	0.0266667	0	0
P3H1	2	0.0266667	0	0
P4HA2	2	0.0266667	0	0
PABPC1	2	0.0266667	0	0
PACSIN2	2	0.0266667	0	0
PAK1	2	0.0266667	0	0
PAK3	2	0.0266667	0	0
PAK6	2	0.0266667	0	0
PALM2-AKAP2	2	0.0266667	0	0
PAPLN	2	0.0266667	0	0
PAPOLA	2	0.0266667	0	0
PAQR8	2	0.0266667	0	0
PARD3B	2	0.0266667	0	0
PATL1	2	0.0266667	0	0
PCDH10	2	0.0266667	0	0
PCDH12	2	0.0266667	0	0
PCDH18	2	0.0266667	0	0
PCDHA11	2	0.0266667	0	0
PCDHA3	2	0.0266667	0	0
PCDHA7	2	0.0266667	0	0
PCDHAC2	2	0.0266667	0	0
PCDHB8	2	0.0266667	0	0
PCDHGB2	2	0.0266667	0	0
PCDHGC3	2	0.0266667	0	0
PCNX3	2	0.0266667	0	0
PCSK1	2	0.0266667	0	0
PCSK5	2	0.0266667	0	0
PCYOX1	2	0.0266667	0	0
PDCD11	2	0.0266667	0	0
PDCD4	2	0.0266667	0	0
PDE1A	2	0.0266667	0	0
PDE3B	2	0.0266667	0	0
PDE6A	2	0.0266667	0	0
PDE8B	2	0.0266667	0	0
PDGFRB	2	0.0266667	0	0
PDLIM7	2	0.0266667	0	0
PDP1	2	0.0266667	0	0
PDP2	2	0.0266667	0	0
PDPR	2	0.0266667	0	0
PDS5A	2	0.0266667	0	0
PDZRN3	2	0.0266667	0	0
PELP1	2	0.0266667	0	0
PER1	2	0.0266667	0	0
PER2	2	0.0266667	0	0
PEX11G	2	0.0266667	0	0
PFKFB2	2	0.0266667	0	0
PGC	2	0.0266667	1	0.1
PGF	2	0.0266667	0	0
PHC3	2	0.0266667	0	0
PHETA2	2	0.0266667	0	0
PHEX	2	0.0266667	0	0
PHF19	2	0.0266667	0	0
PHF20	2	0.0266667	0	0
PHF23	2	0.0266667	0	0
PHF24	2	0.0266667	0	0
PHKA1	2	0.0266667	0	0
PHRF1	2	0.0266667	0	0
PI4KA	2	0.0266667	0	0
PIAS2	2	0.0266667	0	0
PID1	2	0.0266667	0	0
PIDD1	2	0.0266667	0	0
PIEZO1	2	0.0266667	1	0.1
PIEZO2	2	0.0266667	0	0
PIGT	2	0.0266667	0	0
PIGZ	2	0.0266667	0	0
PIH1D1	2	0.0266667	0	0
PIP5K1A	2	0.0266667	0	0
PIP5K1C	2	0.0266667	0	0
PITPNM1	2	0.0266667	0	0
PITPNM3	2	0.0266667	0	0
PKD2L1	2	0.0266667	0	0
PKDREJ	2	0.0266667	0	0
PKN3	2	0.0266667	0	0
PKNOX1	2	0.0266667	0	0
PKP1	2	0.0266667	0	0
PLA2R1	2	0.0266667	0	0
PLAU	2	0.0266667	0	0
PLBD2	2	0.0266667	0	0
PLCE1	2	0.0266667	0	0
PLEC	2	0.0266667	0	0
PLEKHA5	2	0.0266667	0	0
PLEKHD1	2	0.0266667	0	0
PLEKHG2	2	0.0266667	0	0
PLEKHG3	2	0.0266667	0	0
PLEKHH3	2	0.0266667	0	0
PLEKHM3	2	0.0266667	0	0
PLOD1	2	0.0266667	0	0
PLOD3	2	0.0266667	0	0
PLRG1	2	0.0266667	0	0
PLS3	2	0.0266667	0	0
PLXNA2	2	0.0266667	0	0
PLXNA3	2	0.0266667	0	0
PLXNA4	2	0.0266667	0	0
PLXNB3	2	0.0266667	0	0
PLXND1	2	0.0266667	0	0
PMEL	2	0.0266667	0	0
PNISR	2	0.0266667	0	0
PNMA3	2	0.0266667	0	0
PNMT	2	0.0266667	0	0
PNPLA5	2	0.0266667	0	0
POC1B	2	0.0266667	1	0.1
PODNL1	2	0.0266667	0	0
POGK	2	0.0266667	0	0
POGZ	2	0.0266667	0	0
POLD1	2	0.0266667	0	0
POLE2	2	0.0266667	0	0
POLG2	2	0.0266667	0	0
POLR2B	2	0.0266667	0	0
POLR2C	2	0.0266667	0	0
POM121L2	2	0.0266667	0	0
POMC	2	0.0266667	0	0
POMGNT2	2	0.0266667	0	0
POP5	2	0.0266667	0	0
POU2F2	2	0.0266667	0	0
POU5F2	2	0.0266667	0	0
PPARGC1B	2	0.0266667	0	0
PPFIA1	2	0.0266667	0	0
PPFIBP1	2	0.0266667	0	0
PPL	2	0.0266667	0	0
PPM1A	2	0.0266667	0	0
PPM1E	2	0.0266667	0	0
PPM1N	2	0.0266667	0	0
PPME1	2	0.0266667	0	0
PPP1R12C	2	0.0266667	0	0
PPP1R21	2	0.0266667	0	0
PPP1R26	2	0.0266667	0	0
PPP1R32	2	0.0266667	0	0
PPP1R3D	2	0.0266667	0	0
PPP1R3G	2	0.0266667	0	0
PPP1R42	2	0.0266667	0	0
PPP4R3A	2	0.0266667	0	0
PPP6R3	2	0.0266667	0	0
PQBP1	2	0.0266667	0	0
PRAM1	2	0.0266667	0	0
PRDM11	2	0.0266667	0	0
PRDM8	2	0.0266667	0	0
PREP	2	0.0266667	0	0
PREPL	2	0.0266667	0	0
PREX2	2	0.0266667	0	0
PRICKLE3	2	0.0266667	0	0
PRKAG1	2	0.0266667	0	0
PRKCH	2	0.0266667	0	0
PRKCZ	2	0.0266667	0	0
PRKG2	2	0.0266667	0	0
PRKN	2	0.0266667	0	0
PRMT3	2	0.0266667	0	0
PROB1	2	0.0266667	0	0
PROCA1	2	0.0266667	0	0
PROSER2	2	0.0266667	0	0
PROX1	2	0.0266667	0	0
PRPSAP2	2	0.0266667	0	0
PRR23C	2	0.0266667	0	0
PRRC2C	2	0.0266667	0	0
PRSS12	2	0.0266667	0	0
PRSS21	2	0.0266667	0	0
PRSS36	2	0.0266667	0	0
PRX	2	0.0266667	0	0
PSAP	2	0.0266667	0	0
PSD4	2	0.0266667	0	0
PSENEN	2	0.0266667	0	0
PSMA5	2	0.0266667	0	0
PSMA8	2	0.0266667	0	0
PSMB4	2	0.0266667	0	0
PSMB7	2	0.0266667	0	0
PSMD13	2	0.0266667	0	0
PSMD2	2	0.0266667	0	0
PSPC1	2	0.0266667	0	0
PTAFR	2	0.0266667	0	0
PTCD2	2	0.0266667	0	0
PTCHD1	2	0.0266667	0	0
PTK2B	2	0.0266667	0	0
PTK7	2	0.0266667	0	0
PTPN1	2	0.0266667	0	0
PTPN12	2	0.0266667	0	0
PTPN14	2	0.0266667	0	0
PTPN3	2	0.0266667	0	0
PTPN6	2	0.0266667	0	0
PTPN9	2	0.0266667	0	0
PTPRCAP	2	0.0266667	0	0
PTPRK	2	0.0266667	0	0
PTPRN2	2	0.0266667	0	0
PTPRS	2	0.0266667	0	0
PTPRT	2	0.0266667	0	0
PTRH1	2	0.0266667	0	0
PTRHD1	2	0.0266667	0	0
PUS7	2	0.0266667	0	0
PXDNL	2	0.0266667	0	0
PXN	2	0.0266667	0	0
PYCARD	2	0.0266667	0	0
PZP	2	0.0266667	0	0
QSOX2	2	0.0266667	0	0
RAB11FIP2	2	0.0266667	0	0
RAB24	2	0.0266667	0	0
RAB37	2	0.0266667	0	0
RABEP2	2	0.0266667	0	0
RABGAP1L	2	0.0266667	0	0
RABGGTA	2	0.0266667	0	0
RABGGTB	2	0.0266667	0	0
RAD17	2	0.0266667	0	0
RAD21	2	0.0266667	0	0
RAD51D	2	0.0266667	0	0
RAD51L3-RFFL	2	0.0266667	0	0
RAD54B	2	0.0266667	0	0
RAET1L	2	0.0266667	0	0
RAI1	2	0.0266667	0	0
RALGAPB	2	0.0266667	0	0
RANBP3	2	0.0266667	0	0
RANGRF	2	0.0266667	0	0
RAP1GAP2	2	0.0266667	0	0
RAPGEF3	2	0.0266667	0	0
RAPGEF5	2	0.0266667	0	0
RARG	2	0.0266667	0	0
RASAL2	2	0.0266667	0	0
RAVER1	2	0.0266667	0	0
RBBP8NL	2	0.0266667	0	0
RBM10	2	0.0266667	0	0
RBM15B	2	0.0266667	0	0
RBM19	2	0.0266667	0	0
RBM33	2	0.0266667	0	0
RBM39	2	0.0266667	0	0
RC3H1	2	0.0266667	0	0
RECQL4	2	0.0266667	0	0
RELA	2	0.0266667	0	0
REM1	2	0.0266667	0	0
RESF1	2	0.0266667	0	0
REXO2	2	0.0266667	0	0
RGMA	2	0.0266667	0	0
RGS20	2	0.0266667	0	0
RGS6	2	0.0266667	0	0
RHBDD2	2	0.0266667	0	0
RHBDF2	2	0.0266667	0	0
RHCG	2	0.0266667	0	0
RHNO1	2	0.0266667	0	0
RIBC1	2	0.0266667	0	0
RIC1	2	0.0266667	0	0
RIMBP2	2	0.0266667	0	0
RIMS1	2	0.0266667	0	0
RIPK2	2	0.0266667	0	0
RIPOR1	2	0.0266667	0	0
RND3	2	0.0266667	0	0
RNF113A	2	0.0266667	0	0
RNF123	2	0.0266667	0	0
RNF125	2	0.0266667	0	0
RNF145	2	0.0266667	0	0
RNF150	2	0.0266667	0	0
RNF19A	2	0.0266667	0	0
RNF213	2	0.0266667	0	0
RNF26	2	0.0266667	0	0
RNF31	2	0.0266667	0	0
RNF40	2	0.0266667	0	0
RNMT	2	0.0266667	0	0
ROR1	2	0.0266667	0	0
ROS1	2	0.0266667	0	0
RP11-542P2.1	2	0.0266667	0	0
RP11-73M18.2	2	0.0266667	0	0
RP11-762I7.5	2	0.0266667	0	0
RP11-830F9.6	2	0.0266667	0	0
RPH3AL	2	0.0266667	0	0
RPL5	2	0.0266667	0	0
RPP30	2	0.0266667	0	0
RPRML	2	0.0266667	0	0
RREB1	2	0.0266667	0	0
RRN3	2	0.0266667	0	0
RRP8	2	0.0266667	0	0
RSF1	2	0.0266667	0	0
RTCB	2	0.0266667	0	0
RTL5	2	0.0266667	0	0
RTN4	2	0.0266667	0	0
RTN4RL2	2	0.0266667	0	0
RUBCN	2	0.0266667	0	0
RUFY4	2	0.0266667	0	0
RUNX2	2	0.0266667	0	0
RUNX3	2	0.0266667	0	0
RXFP2	2	0.0266667	0	0
S100A16	2	0.0266667	0	0
SACS	2	0.0266667	0	0
SAFB	2	0.0266667	0	0
SAGE1	2	0.0266667	0	0
SAMD15	2	0.0266667	0	0
SAMD4A	2	0.0266667	0	0
SAMD7	2	0.0266667	0	0
SAMD9L	2	0.0266667	0	0
SAP130	2	0.0266667	0	0
SAP25	2	0.0266667	0	0
SART1	2	0.0266667	0	0
SATB2	2	0.0266667	0	0
SAV1	2	0.0266667	0	0
SBK2	2	0.0266667	0	0
SCAI	2	0.0266667	0	0
SCAMP1	2	0.0266667	0	0
SCAPER	2	0.0266667	0	0
SCD	2	0.0266667	0	0
SCLT1	2	0.0266667	0	0
SCN11A	2	0.0266667	0	0
SCN9A	2	0.0266667	1	0.1
SCO2	2	0.0266667	0	0
SCRG1	2	0.0266667	0	0
SCRN1	2	0.0266667	0	0
SCTR	2	0.0266667	0	0
SDCCAG8	2	0.0266667	0	0
SDK2	2	0.0266667	0	0
SEBOX	2	0.0266667	0	0
SEC14L1	2	0.0266667	0	0
SEC24A	2	0.0266667	0	0
SEC31A	2	0.0266667	0	0
SEC61A2	2	0.0266667	0	0
SEL1L	2	0.0266667	0	0
SEMA4A	2	0.0266667	0	0
SEMA4B	2	0.0266667	0	0
SEMA4G	2	0.0266667	0	0
SEMA5A	2	0.0266667	0	0
SEMA6A	2	0.0266667	0	0
SEMA6C	2	0.0266667	0	0
SEMG1	2	0.0266667	0	0
SEMG2	2	0.0266667	0	0
SERGEF	2	0.0266667	0	0
SERPINB2	2	0.0266667	0	0
SETD1B	2	0.0266667	0	0
SETD3	2	0.0266667	0	0
SEZ6	2	0.0266667	0	0
SEZ6L	2	0.0266667	0	0
SF1	2	0.0266667	0	0
SF3B1	2	0.0266667	0	0
SFSWAP	2	0.0266667	0	0
SGCZ	2	0.0266667	0	0
SGPL1	2	0.0266667	0	0
SH3BP4	2	0.0266667	0	0
SH3BP5L	2	0.0266667	0	0
SH3TC2	2	0.0266667	0	0
SHANK2	2	0.0266667	0	0
SHC2	2	0.0266667	0	0
SHC3	2	0.0266667	0	0
SHOX2	2	0.0266667	0	0
SHPRH	2	0.0266667	0	0
SI	2	0.0266667	0	0
SIAH2	2	0.0266667	0	0
SIGIRR	2	0.0266667	0	0
SIGLEC11	2	0.0266667	0	0
SIM1	2	0.0266667	0	0
SIRPB1	2	0.0266667	0	0
SIRPB2	2	0.0266667	0	0
SIRT2	2	0.0266667	0	0
SIX1	2	0.0266667	0	0
SLC10A1	2	0.0266667	0	0
SLC16A7	2	0.0266667	0	0
SLC17A3	2	0.0266667	0	0
SLC17A7	2	0.0266667	0	0
SLC18A3	2	0.0266667	0	0
SLC1A6	2	0.0266667	0	0
SLC20A1	2	0.0266667	0	0
SLC22A8	2	0.0266667	0	0
SLC24A1	2	0.0266667	1	0.1
SLC25A39	2	0.0266667	0	0
SLC25A46	2	0.0266667	0	0
SLC26A4	2	0.0266667	0	0
SLC27A1	2	0.0266667	0	0
SLC27A5	2	0.0266667	0	0
SLC28A3	2	0.0266667	0	0
SLC2A11	2	0.0266667	0	0
SLC2A12	2	0.0266667	0	0
SLC2A13	2	0.0266667	0	0
SLC35B4	2	0.0266667	0	0
SLC35F5	2	0.0266667	0	0
SLC35G5	2	0.0266667	0	0
SLC36A3	2	0.0266667	0	0
SLC38A11	2	0.0266667	0	0
SLC39A5	2	0.0266667	0	0
SLC41A2	2	0.0266667	0	0
SLC41A3	2	0.0266667	0	0
SLC4A1	2	0.0266667	0	0
SLC4A2	2	0.0266667	0	0
SLC4A5	2	0.0266667	0	0
SLC4A8	2	0.0266667	0	0
SLC52A1	2	0.0266667	0	0
SLC5A6	2	0.0266667	0	0
SLC6A14	2	0.0266667	0	0
SLC7A5	2	0.0266667	0	0
SLC7A8	2	0.0266667	0	0
SLC8A1	2	0.0266667	0	0
SLC9A3	2	0.0266667	0	0
SLCO1B7	2	0.0266667	0	0
SLCO4A1	2	0.0266667	0	0
SLIT1	2	0.0266667	0	0
SLITRK3	2	0.0266667	0	0
SLITRK6	2	0.0266667	0	0
SLK	2	0.0266667	0	0
SLURP1	2	0.0266667	0	0
SMG1	2	0.0266667	0	0
SMG5	2	0.0266667	0	0
SMG6	2	0.0266667	0	0
SMG8	2	0.0266667	0	0
SMIM29	2	0.0266667	0	0
SMPD3	2	0.0266667	0	0
SMS	2	0.0266667	0	0
SMTNL1	2	0.0266667	0	0
SMYD5	2	0.0266667	0	0
SNCAIP	2	0.0266667	0	0
SNRK	2	0.0266667	0	0
SNRNP200	2	0.0266667	0	0
SNTG2	2	0.0266667	0	0
SNX11	2	0.0266667	0	0
SNX16	2	0.0266667	0	0
SNX17	2	0.0266667	0	0
SNX20	2	0.0266667	0	0
SNX8	2	0.0266667	0	0
SOGA1	2	0.0266667	0	0
SOGA3	2	0.0266667	0	0
SON	2	0.0266667	0	0
SORBS1	2	0.0266667	0	0
SORBS2	2	0.0266667	0	0
SORCS2	2	0.0266667	0	0
SOS2	2	0.0266667	0	0
SOX13	2	0.0266667	0	0
SOX4	2	0.0266667	0	0
SOX8	2	0.0266667	0	0
SP4	2	0.0266667	0	0
SPACA7	2	0.0266667	0	0
SPAG4	2	0.0266667	0	0
SPAG9	2	0.0266667	0	0
SPARCL1	2	0.0266667	0	0
SPATA20	2	0.0266667	0	0
SPATA31D1	2	0.0266667	0	0
SPATA6	2	0.0266667	0	0
SPATC1	2	0.0266667	0	0
SPECC1L	2	0.0266667	0	0
SPEN	2	0.0266667	0	0
SPIN4	2	0.0266667	0	0
SPIRE1	2	0.0266667	0	0
SPOUT1	2	0.0266667	0	0
SPTA1	2	0.0266667	0	0
SPTBN1	2	0.0266667	0	0
SQSTM1	2	0.0266667	0	0
SRCAP	2	0.0266667	0	0
SRGAP1	2	0.0266667	0	0
SRRM2	2	0.0266667	0	0
SRRT	2	0.0266667	0	0
SRSF11	2	0.0266667	0	0
SRSF6	2	0.0266667	0	0
SSBP2	2	0.0266667	0	0
SSBP4	2	0.0266667	0	0
SSC4D	2	0.0266667	0	0
SSH2	2	0.0266667	0	0
SSRP1	2	0.0266667	0	0
SSUH2	2	0.0266667	0	0
SSX2IP	2	0.0266667	0	0
ST3GAL1	2	0.0266667	0	0
ST3GAL2	2	0.0266667	0	0
ST3GAL4	2	0.0266667	0	0
ST3GAL6	2	0.0266667	0	0
ST5	2	0.0266667	0	0
ST8SIA5	2	0.0266667	0	0
STAB1	2	0.0266667	0	0
STAC3	2	0.0266667	0	0
STARD13	2	0.0266667	0	0
STAT5A	2	0.0266667	0	0
STEAP3	2	0.0266667	0	0
STIM1	2	0.0266667	0	0
STK31	2	0.0266667	0	0
STK36	2	0.0266667	0	0
STKLD1	2	0.0266667	0	0
STON1-GTF2A1L	2	0.0266667	0	0
STPG1	2	0.0266667	0	0
STRN	2	0.0266667	0	0
STT3A	2	0.0266667	0	0
STUB1	2	0.0266667	0	0
STX19	2	0.0266667	0	0
STXBP1	2	0.0266667	0	0
STXBP2	2	0.0266667	0	0
STXBP4	2	0.0266667	0	0
SUN2	2	0.0266667	0	0
SUN5	2	0.0266667	0	0
SUPT3H	2	0.0266667	0	0
SUPT7L	2	0.0266667	0	0
SUPV3L1	2	0.0266667	0	0
SUZ12	2	0.0266667	0	0
SV2B	2	0.0266667	1	0.1
SVEP1	2	0.0266667	0	0
SVIL	2	0.0266667	0	0
SVOPL	2	0.0266667	0	0
SWT1	2	0.0266667	0	0
SYCP2L	2	0.0266667	0	0
SYNDIG1	2	0.0266667	0	0
SYNE2	2	0.0266667	0	0
SYNPO	2	0.0266667	0	0
SYT15	2	0.0266667	0	0
SYTL3	2	0.0266667	0	0
SYTL4	2	0.0266667	0	0
SYVN1	2	0.0266667	0	0
SZT2	2	0.0266667	0	0
TAAR6	2	0.0266667	0	0
TACC2	2	0.0266667	0	0
TACC3	2	0.0266667	0	0
TAF1	2	0.0266667	0	0
TAF5	2	0.0266667	0	0
TAF6	2	0.0266667	0	0
TAF6L	2	0.0266667	0	0
TAGAP	2	0.0266667	0	0
TAOK2	2	0.0266667	0	0
TAS1R3	2	0.0266667	0	0
TAS2R30	2	0.0266667	0	0
TAX1BP1	2	0.0266667	0	0
TBC1D15	2	0.0266667	0	0
TBC1D19	2	0.0266667	0	0
[truncated: 1,489 more rows]

## Sheet: Table S7
Table S7. Promoter mutation frequency in IDH1-mutant or -wildtype oligodendroglioma patients.
Gene Name	IDH1-mutant Patient count	IDH1-mutant Patient ratio (out of 75)	IDH1-WT Patient count	IDH1-WT Patient ratio (out of 16)
HBG2	4	0.0533333	4	0.25
HBE1	3	0.04	3	0.1875
AC010336.1	2	0.0266667	2	0.125
AMIGO3	2	0.0266667	2	0.125
C10orf55	2	0.0266667	2	0.125
CBFA2T2	2	0.0266667	2	0.125
CENPO	2	0.0266667	2	0.125
CGREF1	2	0.0266667	2	0.125
CYB5D2	2	0.0266667	2	0.125
FAAP100	2	0.0266667	2	0.125
FAM217B	2	0.0266667	2	0.125
GAL3ST2	2	0.0266667	2	0.125
HYAL3	2	0.0266667	2	0.125
HYPK	2	0.0266667	2	0.125
LIMK1	2	0.0266667	2	0.125
MED14	2	0.0266667	2	0.125
MRPS22	2	0.0266667	2	0.125
NCKAP5L	2	0.0266667	2	0.125
OR2W3	2	0.0266667	2	0.125
PCBP2	2	0.0266667	2	0.125
PTPRA	2	0.0266667	2	0.125
RP5-850E9.3	2	0.0266667	2	0.125
RPA2	2	0.0266667	2	0.125
RPL26L1	2	0.0266667	2	0.125
SCAMP4	2	0.0266667	2	0.125
SCRT2	2	0.0266667	2	0.125
SEC24A	2	0.0266667	2	0.125
SLCO1A2	2	0.0266667	2	0.125
TBX1	2	0.0266667	2	0.125
TREX2	2	0.0266667	2	0.125
TRMT1	2	0.0266667	2	0.125
UQCRC1	2	0.0266667	2	0.125
ZC3H7B	2	0.0266667	2	0.125
ZNF224	2	0.0266667	2	0.125
ABHD14B	1	0.0133333	1	0.0625
DZANK1	1	0.0133333	1	0.0625
HTRA2	1	0.0133333	1	0.0625
MMP26	1	0.0133333	1	0.0625
OR2L13	1	0.0133333	1	0.0625
P2RY12	1	0.0133333	1	0.0625
PTPRZ1	1	0.0133333	1	0.0625
TAF9	1	0.0133333	1	0.0625
THAP2	1	0.0133333	1	0.0625
ZNF581	1	0.0133333	1	0.0625

## Sheet: Table S8
Table S8. Terminator mutation frequency in IDH1-mutant or -wildtype oligodendroglioma patients.
Gene Name	IDH1-mutant Patient count	IDH1-mutant Patient ratio (out of 75)	IDH1-WT Patient count	IDH1-WT Patient ratio (out of 14)
ARHGAP19-SLIT1	3	0.04	3	0.214286
BAX	1	0.0133333	1	0.0714286
BCL9L	2	0.0266667	2	0.142857
CFAP73	2	0.0266667	2	0.142857
CRACR2B	1	0.0133333	1	0.0714286
CTB-96E2.2	2	0.0266667	2	0.142857
DDI2	1	0.0133333	1	0.0714286
EIF2AK1	1	0.0133333	1	0.0714286
FBXW9	1	0.0133333	1	0.0714286
GAS2L1	2	0.0266667	2	0.142857
GMPPB	2	0.0266667	2	0.142857
KRR1	1	0.0133333	1	0.0714286
LENG1	1	0.0133333	1	0.0714286
PGS1	2	0.0266667	2	0.142857
PHETA1	1	0.0133333	1	0.0714286
RP1-66C13.4	2	0.0266667	2	0.142857
RPL36A-HNRNPH2	2	0.0266667	2	0.142857
RSPH9	2	0.0266667	2	0.142857
SLC25A35	2	0.0266667	2	0.142857
SRRD	2	0.0266667	2	0.142857
TBL3	2	0.0266667	2	0.142857
TOX4	2	0.0266667	2	0.142857
TSPOAP1	1	0.0133333	1	0.0714286
VNN3	2	0.0266667	2	0.142857
VTI1B	2	0.0266667	2	0.142857
ZDHHC11	1	0.0133333	1	0.0714286

## Sheet: Table S9
Table S9. Intronic mutation frequency in IDH1-mutant or -wildtype oligodendroglioma patients.
Gene Name	IDH1-mutant Patient count	IDH1-mutant Patient ratio (out of 75)	IDH1-WT Patient count	IDH1-WT Patient ratio (out of 58)
PCDHGA1	6	0.08	6	0.103448
PCDHGA2	6	0.08	6	0.103448
PCDHGA3	6	0.08	6	0.103448
CIC	5	0.0666667	5	0.0862069
FUBP1	5	0.0666667	5	0.0862069
PCDHGA4	5	0.0666667	5	0.0862069
PCDHGB1	5	0.0666667	5	0.0862069
PCDHGB2	5	0.0666667	5	0.0862069
ARHGEF18	4	0.0533333	4	0.0689655
CTD-2207O23.3	4	0.0533333	4	0.0689655
PCDHA1	4	0.0533333	4	0.0689655
PCDHA2	4	0.0533333	4	0.0689655
PCDHA3	4	0.0533333	4	0.0689655
PCDHA4	4	0.0533333	4	0.0689655
PCDHA5	4	0.0533333	4	0.0689655
PCDHA6	4	0.0533333	4	0.0689655
PCDHGA10	4	0.0533333	4	0.0689655
PCDHGA5	4	0.0533333	4	0.0689655
PCDHGA6	4	0.0533333	4	0.0689655
PCDHGA7	4	0.0533333	4	0.0689655
PCDHGA8	4	0.0533333	4	0.0689655
PCDHGA9	4	0.0533333	4	0.0689655
PCDHGB3	4	0.0533333	4	0.0689655
PCDHGB4	4	0.0533333	4	0.0689655
PCDHGB6	4	0.0533333	4	0.0689655
PCDHGB7	4	0.0533333	4	0.0689655
DOCK1	3	0.04	3	0.0517241
LRCH2	3	0.04	3	0.0517241
PCDHGA11	3	0.04	3	0.0517241
PCDHGA12	3	0.04	3	0.0517241
AARS2	2	0.0266667	2	0.0344828
ABCA10	2	0.0266667	2	0.0344828
ABTB1	2	0.0266667	2	0.0344828
AC003043.1	2	0.0266667	2	0.0344828
AC005082.1	2	0.0266667	2	0.0344828
ACACB	2	0.0266667	2	0.0344828
ACAD8	2	0.0266667	2	0.0344828
ACSF2	2	0.0266667	2	0.0344828
ADAM33	2	0.0266667	2	0.0344828
ADGRG4	2	0.0266667	2	0.0344828
ADGRL1	2	0.0266667	2	0.0344828
ADPRHL2	2	0.0266667	2	0.0344828
AHNAK2	2	0.0266667	2	0.0344828
ALG13	2	0.0266667	2	0.0344828
ANGPTL5	2	0.0266667	2	0.0344828
ANKRD36	2	0.0266667	2	0.0344828
ANKRD42	2	0.0266667	2	0.0344828
ANKRD61	2	0.0266667	2	0.0344828
ANTXR1	2	0.0266667	2	0.0344828
ANXA5	2	0.0266667	2	0.0344828
AOAH	2	0.0266667	2	0.0344828
AP000304.12	2	0.0266667	2	0.0344828
AP000350.10	2	0.0266667	2	0.0344828
AP3B1	2	0.0266667	2	0.0344828
AP5Z1	2	0.0266667	2	0.0344828
APPL1	2	0.0266667	2	0.0344828
ARHGAP1	2	0.0266667	2	0.0344828
ARL13B	2	0.0266667	2	0.0344828
ARMH1	2	0.0266667	2	0.0344828
ATRNL1	2	0.0266667	2	0.0344828
BDP1	2	0.0266667	2	0.0344828
BMX	2	0.0266667	2	0.0344828
CACHD1	2	0.0266667	2	0.0344828
CANX	2	0.0266667	2	0.0344828
CAPN10	2	0.0266667	2	0.0344828
CAST	2	0.0266667	2	0.0344828
CBFA2T3	2	0.0266667	2	0.0344828
CCDC33	2	0.0266667	2	0.0344828
CCDC40	2	0.0266667	2	0.0344828
CCNL2	2	0.0266667	2	0.0344828
CD38	2	0.0266667	2	0.0344828
CDK18	2	0.0266667	2	0.0344828
CDKL5	2	0.0266667	2	0.0344828
CELSR2	2	0.0266667	2	0.0344828
CENPJ	2	0.0266667	2	0.0344828
CEP170B	2	0.0266667	2	0.0344828
CFHR4	2	0.0266667	2	0.0344828
CHCHD3	2	0.0266667	2	0.0344828
CHD3	2	0.0266667	2	0.0344828
CHM	2	0.0266667	2	0.0344828
CIT	2	0.0266667	2	0.0344828
CKAP5	2	0.0266667	2	0.0344828
CLSTN2	2	0.0266667	2	0.0344828
COL1A1	2	0.0266667	2	0.0344828
COL2A1	2	0.0266667	2	0.0344828
COL5A1	2	0.0266667	2	0.0344828
COPS4	2	0.0266667	2	0.0344828
CPNE5	2	0.0266667	2	0.0344828
CTD-2510F5.6	2	0.0266667	2	0.0344828
CTNNA1	2	0.0266667	2	0.0344828
CTPS2	2	0.0266667	2	0.0344828
CYP2A6	2	0.0266667	2	0.0344828
CYP2S1	2	0.0266667	2	0.0344828
DDX27	2	0.0266667	2	0.0344828
DEF6	2	0.0266667	2	0.0344828
DGKI	2	0.0266667	2	0.0344828
DLC1	2	0.0266667	2	0.0344828
DLX4	2	0.0266667	2	0.0344828
DMD	2	0.0266667	2	0.0344828
DNAH9	2	0.0266667	2	0.0344828
DOCK11	2	0.0266667	2	0.0344828
DOCK5	2	0.0266667	2	0.0344828
DOCK6	2	0.0266667	2	0.0344828
DOCK8	2	0.0266667	2	0.0344828
DUSP22	2	0.0266667	2	0.0344828
EDRF1	2	0.0266667	2	0.0344828
EIF2AK1	2	0.0266667	2	0.0344828
EIF2D	2	0.0266667	2	0.0344828
ELF2	2	0.0266667	2	0.0344828
ELOVL2	2	0.0266667	2	0.0344828
EPCAM	2	0.0266667	2	0.0344828
EPS8	2	0.0266667	2	0.0344828
ERAL1	2	0.0266667	2	0.0344828
ERAP1	2	0.0266667	2	0.0344828
F2	2	0.0266667	2	0.0344828
FAM172A	2	0.0266667	2	0.0344828
FAM53B	2	0.0266667	2	0.0344828
FAM71E2	2	0.0266667	2	0.0344828
FCRL6	2	0.0266667	2	0.0344828
FGD4	2	0.0266667	2	0.0344828
FLII	2	0.0266667	2	0.0344828
FPGT-TNNI3K	2	0.0266667	2	0.0344828
FRY	2	0.0266667	2	0.0344828
GALNT9	2	0.0266667	2	0.0344828
GKN2	2	0.0266667	2	0.0344828
GLRB	2	0.0266667	2	0.0344828
GPC4	2	0.0266667	2	0.0344828
GRHL2	2	0.0266667	2	0.0344828
GRHL3	2	0.0266667	2	0.0344828
GRIA4	2	0.0266667	2	0.0344828
GRTP1	2	0.0266667	2	0.0344828
GSC	2	0.0266667	2	0.0344828
GUCY2D	2	0.0266667	2	0.0344828
HEG1	2	0.0266667	2	0.0344828
HERC2	2	0.0266667	2	0.0344828
HEY2	2	0.0266667	2	0.0344828
HTR5A-AS1	2	0.0266667	2	0.0344828
IAPP	2	0.0266667	2	0.0344828
ICOSLG	2	0.0266667	2	0.0344828
INPP5F	2	0.0266667	2	0.0344828
INPP5J	2	0.0266667	2	0.0344828
IREB2	2	0.0266667	2	0.0344828
ITGAX	2	0.0266667	2	0.0344828
KARS	2	0.0266667	2	0.0344828
KDM2A	2	0.0266667	2	0.0344828
KEL	2	0.0266667	2	0.0344828
KIAA0586	2	0.0266667	2	0.0344828
KIF16B	2	0.0266667	2	0.0344828
KMT2A	2	0.0266667	2	0.0344828
KREMEN1	2	0.0266667	2	0.0344828
LAP3	2	0.0266667	2	0.0344828
LILRA6	2	0.0266667	2	0.0344828
LIMS2	2	0.0266667	2	0.0344828
LIPG	2	0.0266667	2	0.0344828
LRP5	2	0.0266667	2	0.0344828
LST3	2	0.0266667	2	0.0344828
MACROD1	2	0.0266667	2	0.0344828
MAGI2	2	0.0266667	2	0.0344828
MAP4K5	2	0.0266667	2	0.0344828
MED22	2	0.0266667	2	0.0344828
MED6	2	0.0266667	2	0.0344828
MEI1	2	0.0266667	2	0.0344828
MEN1	2	0.0266667	2	0.0344828
MORC2	2	0.0266667	2	0.0344828
MPP4	2	0.0266667	2	0.0344828
MRPL43	2	0.0266667	2	0.0344828
MX1	2	0.0266667	2	0.0344828
MYH4	2	0.0266667	2	0.0344828
MYO15A	2	0.0266667	2	0.0344828
MYT1	2	0.0266667	2	0.0344828
NDOR1	2	0.0266667	2	0.0344828
NEB	2	0.0266667	2	0.0344828
NECAB3	2	0.0266667	2	0.0344828
NHSL2	2	0.0266667	2	0.0344828
NME3	2	0.0266667	2	0.0344828
NOS3	2	0.0266667	2	0.0344828
NOSIP	2	0.0266667	2	0.0344828
NOSTRIN	2	0.0266667	2	0.0344828
NOTCH1	2	0.0266667	2	0.0344828
NUB1	2	0.0266667	2	0.0344828
OLFM3	2	0.0266667	2	0.0344828
OPA1	2	0.0266667	2	0.0344828
OVCH1-AS1	2	0.0266667	2	0.0344828
PARD3	2	0.0266667	2	0.0344828
PASK	2	0.0266667	2	0.0344828
PC	2	0.0266667	2	0.0344828
PCDHA10	2	0.0266667	2	0.0344828
PCDHA11	2	0.0266667	2	0.0344828
PCDHA12	2	0.0266667	2	0.0344828
PCDHA13	2	0.0266667	2	0.0344828
PCDHA7	2	0.0266667	2	0.0344828
PCDHA8	2	0.0266667	2	0.0344828
PCDHA9	2	0.0266667	2	0.0344828
PCDHAC1	2	0.0266667	2	0.0344828
PCSK5	2	0.0266667	2	0.0344828
PDLIM3	2	0.0266667	2	0.0344828
PFKL	2	0.0266667	2	0.0344828
PGK1	2	0.0266667	2	0.0344828
PHYHIP	2	0.0266667	2	0.0344828
PIEZO1	2	0.0266667	2	0.0344828
PIK3C2B	2	0.0266667	2	0.0344828
PIK3CG	2	0.0266667	2	0.0344828
PKD1	2	0.0266667	2	0.0344828
PKD1L2	2	0.0266667	2	0.0344828
PLCH2	2	0.0266667	2	0.0344828
PLOD3	2	0.0266667	2	0.0344828
PLTP	2	0.0266667	2	0.0344828
POLR3A	2	0.0266667	2	0.0344828
PPIB	2	0.0266667	2	0.0344828
PPP1R12C	2	0.0266667	2	0.0344828
PPP4R1	2	0.0266667	2	0.0344828
PRMT8	2	0.0266667	2	0.0344828
PROX2	2	0.0266667	2	0.0344828
PRSS48	2	0.0266667	2	0.0344828
PSMD1	2	0.0266667	2	0.0344828
PTDSS2	2	0.0266667	2	0.0344828
PTPRJ	2	0.0266667	2	0.0344828
PTPRN	2	0.0266667	2	0.0344828
PUS7	2	0.0266667	2	0.0344828
PYCR3	2	0.0266667	2	0.0344828
RABGAP1L	2	0.0266667	2	0.0344828
RAE1	2	0.0266667	2	0.0344828
RALGPS2	2	0.0266667	2	0.0344828
RAPGEF4	2	0.0266667	2	0.0344828
RAPGEFL1	2	0.0266667	2	0.0344828
RGL3	2	0.0266667	2	0.0344828
RIPPLY2	2	0.0266667	2	0.0344828
RMC1	2	0.0266667	2	0.0344828
RP1-170O19.20	2	0.0266667	2	0.0344828
RP11-73M18.2	2	0.0266667	2	0.0344828
SCIN	2	0.0266667	2	0.0344828
SEC31A	2	0.0266667	2	0.0344828
SERINC4	2	0.0266667	2	0.0344828
SH2D4B	2	0.0266667	2	0.0344828
SIM1	2	0.0266667	2	0.0344828
SLC12A5	2	0.0266667	2	0.0344828
SLC17A9	2	0.0266667	2	0.0344828
SLC3A1	2	0.0266667	2	0.0344828
SLC5A1	2	0.0266667	2	0.0344828
SLC7A7	2	0.0266667	2	0.0344828
SMAD6	2	0.0266667	2	0.0344828
SND1	2	0.0266667	2	0.0344828
SNX31	2	0.0266667	2	0.0344828
SPTBN5	2	0.0266667	2	0.0344828
SRPK2	2	0.0266667	2	0.0344828
SRRM3	2	0.0266667	2	0.0344828
STRA6	2	0.0266667	2	0.0344828
SUN3	2	0.0266667	2	0.0344828
SWT1	2	0.0266667	2	0.0344828
SYT8	2	0.0266667	2	0.0344828
TBC1D21	2	0.0266667	2	0.0344828
TBC1D26	2	0.0266667	2	0.0344828
TDRD1	2	0.0266667	2	0.0344828
TENM3	2	0.0266667	2	0.0344828
TEX13B	2	0.0266667	2	0.0344828
THOC6	2	0.0266667	2	0.0344828
THOP1	2	0.0266667	2	0.0344828
TIMM10	2	0.0266667	2	0.0344828
TMEM175	2	0.0266667	2	0.0344828
TMEM222	2	0.0266667	2	0.0344828
TMEM56-RWDD3	2	0.0266667	2	0.0344828
TNNI3K	2	0.0266667	2	0.0344828
TPO	2	0.0266667	2	0.0344828
TPP1	2	0.0266667	2	0.0344828
TRIP12	2	0.0266667	2	0.0344828
TROAP	2	0.0266667	2	0.0344828
TSPEAR	2	0.0266667	2	0.0344828
TUT1	2	0.0266667	2	0.0344828
TYMS	2	0.0266667	2	0.0344828
UGT1A10	2	0.0266667	2	0.0344828
UGT1A7	2	0.0266667	2	0.0344828
UGT1A9	2	0.0266667	2	0.0344828
UGT2A1	2	0.0266667	2	0.0344828
ULBP3	2	0.0266667	2	0.0344828
UNC13A	2	0.0266667	2	0.0344828
UTP18	2	0.0266667	2	0.0344828
VAC14	2	0.0266667	2	0.0344828
VAMP4	2	0.0266667	2	0.0344828
WDR48	2	0.0266667	2	0.0344828
XPO5	2	0.0266667	2	0.0344828
XPR1	2	0.0266667	2	0.0344828
ZDHHC2	2	0.0266667	2	0.0344828
ZNF321P	2	0.0266667	2	0.0344828
ZNF461	2	0.0266667	2	0.0344828
ZNF618	2	0.0266667	2	0.0344828
ZNHIT1	2	0.0266667	2	0.0344828
AC026407.1	1	0.0133333	1	0.0172414
ADAMTS16	1	0.0133333	1	0.0172414
ADAMTSL1	1	0.0133333	1	0.0172414
AHI1	1	0.0133333	1	0.0172414
ANKDD1B	1	0.0133333	1	0.0172414
ARHGEF11	1	0.0133333	1	0.0172414
ARHGEF12	1	0.0133333	1	0.0172414
ARPC4-TTLL3	1	0.0133333	1	0.0172414
ASAP3	1	0.0133333	1	0.0172414
ASPM	1	0.0133333	1	0.0172414
ATG4B	1	0.0133333	1	0.0172414
ATXN7L1	1	0.0133333	1	0.0172414
C14orf93	1	0.0133333	1	0.0172414
C1orf105	1	0.0133333	1	0.0172414
C1orf56	1	0.0133333	1	0.0172414
C20orf173	1	0.0133333	1	0.0172414
C2CD3	1	0.0133333	1	0.0172414
C3	1	0.0133333	1	0.0172414
CDC42BPA	1	0.0133333	1	0.0172414
CDC42BPB	1	0.0133333	1	0.0172414
CDK11B	1	0.0133333	1	0.0172414
CDK4	1	0.0133333	1	0.0172414
CENPT	1	0.0133333	1	0.0172414
CERKL	1	0.0133333	1	0.0172414
CHURC1-FNTB	1	0.0133333	1	0.0172414
CLPSL2	1	0.0133333	1	0.0172414
CLUH	1	0.0133333	1	0.0172414
COPB1	1	0.0133333	1	0.0172414
CPSF1	1	0.0133333	1	0.0172414
CTD-2215E18.1	1	0.0133333	1	0.0172414
CTD-3105H18.16	1	0.0133333	1	0.0172414
CTDP1	1	0.0133333	1	0.0172414
CYFIP2	1	0.0133333	1	0.0172414
DHTKD1	1	0.0133333	1	0.0172414
DLGAP1	1	0.0133333	1	0.0172414
DNAH17	1	0.0133333	1	0.0172414
DOCK2	1	0.0133333	1	0.0172414
DTNA	1	0.0133333	1	0.0172414
ENOX1	1	0.0133333	1	0.0172414
EP300	1	0.0133333	1	0.0172414
ERMARD	1	0.0133333	1	0.0172414
FGD2	1	0.0133333	1	0.0172414
FZD4	1	0.0133333	1	0.0172414
GAS8	1	0.0133333	1	0.0172414
GCGR	1	0.0133333	1	0.0172414
GFRA2	1	0.0133333	1	0.0172414
GLG1	1	0.0133333	1	0.0172414
GOLGA1	1	0.0133333	1	0.0172414
HAUS4	1	0.0133333	1	0.0172414
HAUS7	1	0.0133333	1	0.0172414
HEATR4	1	0.0133333	1	0.0172414
HEPACAM2	1	0.0133333	1	0.0172414
HSD17B3	1	0.0133333	1	0.0172414
HTRA1	1	0.0133333	1	0.0172414
IQSEC3	1	0.0133333	1	0.0172414
KCNIP4	1	0.0133333	1	0.0172414
KCNK15	1	0.0133333	1	0.0172414
KIAA1522	1	0.0133333	1	0.0172414
KRT6A	1	0.0133333	1	0.0172414
LAMB4	1	0.0133333	1	0.0172414
LAMP2	1	0.0133333	1	0.0172414
LRRIQ3	1	0.0133333	1	0.0172414
MACF1	1	0.0133333	1	0.0172414
MARK2	1	0.0133333	1	0.0172414
MED23	1	0.0133333	1	0.0172414
MMRN1	1	0.0133333	1	0.0172414
MUC13	1	0.0133333	1	0.0172414
MUC5B	1	0.0133333	1	0.0172414
MYO9A	1	0.0133333	1	0.0172414
NFATC3	1	0.0133333	1	0.0172414
NFIB	1	0.0133333	1	0.0172414
NLRC5	1	0.0133333	1	0.0172414
NME9	1	0.0133333	1	0.0172414
NRAP	1	0.0133333	1	0.0172414
OFD1	1	0.0133333	1	0.0172414
PATJ	1	0.0133333	1	0.0172414
PHF3	1	0.0133333	1	0.0172414
PI4K2A	1	0.0133333	2	0.0344828
PLEKHG5	1	0.0133333	1	0.0172414
PLXNA3	1	0.0133333	1	0.0172414
RAB11FIP5	1	0.0133333	1	0.0172414
RAPGEF5	1	0.0133333	1	0.0172414
RBBP6	1	0.0133333	1	0.0172414
RGS16	1	0.0133333	1	0.0172414
RHD	1	0.0133333	1	0.0172414
RIF1	1	0.0133333	1	0.0172414
RIMS2	1	0.0133333	1	0.0172414
RNF44	1	0.0133333	1	0.0172414
RNF8	1	0.0133333	1	0.0172414
RP11-144F15.1	1	0.0133333	1	0.0172414
RP11-178C3.1	1	0.0133333	1	0.0172414
RP11-298I3.5	1	0.0133333	1	0.0172414
RP11-343C2.12	1	0.0133333	1	0.0172414
RP11-724O16.1	1	0.0133333	1	0.0172414
SBNO1	1	0.0133333	1	0.0172414
SLC2A6	1	0.0133333	1	0.0172414
SLC34A1	1	0.0133333	1	0.0172414
SLC4A4	1	0.0133333	1	0.0172414
SMIM13	1	0.0133333	1	0.0172414
SNTA1	1	0.0133333	1	0.0172414
SPACA3	1	0.0133333	1	0.0172414
SREBF1	1	0.0133333	1	0.0172414
STXBP3	1	0.0133333	1	0.0172414
TBC1D2	1	0.0133333	1	0.0172414
TFEC	1	0.0133333	1	0.0172414
TM4SF2	1	0.0133333	1	0.0172414
TMEM14C	1	0.0133333	1	0.0172414
TP53	1	0.0133333	1	0.0172414
TPH2	1	0.0133333	1	0.0172414
TPRX2P	1	0.0133333	1	0.0172414
TRIOBP	1	0.0133333	1	0.0172414
TRIP6	1	0.0133333	1	0.0172414
TTN	1	0.0133333	1	0.0172414
UGT1A3	1	0.0133333	1	0.0172414
UGT1A4	1	0.0133333	1	0.0172414
UGT1A5	1	0.0133333	1	0.0172414
UGT1A6	1	0.0133333	1	0.0172414
UGT1A8	1	0.0133333	1	0.0172414
UNC13C	1	0.0133333	1	0.0172414
UNC5D	1	0.0133333	1	0.0172414
VWCE	1	0.0133333	1	0.0172414
WDFY4	1	0.0133333	1	0.0172414
WNT4	1	0.0133333	1	0.0172414
WWOX	1	0.0133333	1	0.0172414
ZNF532	1	0.0133333	1	0.0172414

## Sheet: Table S10
Table S10: CRAVAT analysis of frequently mutated genes in IDH1-mutant astrocytoma.
Input line	ID	Chromosome	Position	Strand	Reference base(s)	Alternate base(s)	Sample ID	HUGO symbol	Sequence ontology	Protein sequence change	CHASM p-value	CHASM FDR	ClinVar	COSMIC ID	COSMIC variant count (tissue)	Number of samples with variant	dbSNP	ESP6500 AF (average)	GeneCards summary (from http://www.genecards.org)	PubMed article count	PubMed search term	gnomAD AF Total	gnomAD AF African	gnomAD AF American	gnomAD AF Ashkenazi Jewish	gnomAD AF East Asian	gnomAD AF Finnish	gnomAD AF Non-Finnish European	gnomAD AF Other	gnomAD AF South Asian	GWAS NHLBI Key (GRASP)	GWAS PMID (GRASP)	GWAS Phenotype (GRASP)	Protein 3D variant	In TCGA Mutation Cluster	ncRNA Class	ncRNA Name	Pseudogene	Pseudogene Transcript	Repeat Class	Repeat Family	Repeat Name	TARGET	1000 Genomes AF	UTR/Intron	UTR/Intron Gene	UTR/Intron All Transcript	VEST p-value	VEST FDR
1	TP53-1	chr17	7573988	-	G	A	central_nervous_system	TP53	MS	A347T	0.0004	0.05		COSM45717	breast(2); central_nervous_system(2)	1		0	This gene encodes a tumor suppressor protein containing transcriptional activation, DNA binding, and	4200	http://www.ncbi.nlm.nih.gov/pubmed?term=TP53[TIAB]+AND+cancer[MH]													../MuPIT_Interactive?gm=chr17:7670670									Wee1 inhibitors	0	intron	TP53	ENST00000413465.6(intron),ENST00000359597.8(intron),ENST00000504290.5(5' UTR),ENST00000510385.5(5' UTR),ENST00000610623.4(5' UTR),ENST00000618944.4(5' UTR),ENST00000617185.4(5' UTR),ENST00000420246.6(5' UTR),ENST00000455263.6(5' UTR),ENST00000610538.4(5' UTR),ENST00000622645.4(5' UTR)	0.12438	0.2
2	TP53-2	chr17	7577121	-	C	T	central_nervous_system	TP53	MS	R273C	0	0.05		COSM10659	large_intestine(141); vulva(8); pleura(1); peritoneum(1); endometrium(20); lung(17); skin(12); kidney(2); thyroid(4); cervix(5); eye(1); central_nervous_system(177); genital_tract(1); oesophagus(28); upper_aerodigestive_tract(33); biliary_tract(7); stomach(36); soft_tissue(2); urinary_tract(13); breast(28); penis(1); prostate(15); pancreas(23); adrenal_gland(4); salivary_gland(1); small_intestine…	1	rs121913343	0	This gene encodes a tumor suppressor protein containing transcriptional activation, DNA binding, and	4200	http://www.ncbi.nlm.nih.gov/pubmed?term=TP53[TIAB]+AND+cancer[MH]													../MuPIT_Interactive?gm=chr17:7673803	Yes								Wee1 inhibitors	0	intron	TP53	ENST00000413465.6(intron)	0.00253	0.05
3	TP53-3	chr17	7577121	-	C	T	central_nervous_system	TP53	MS	R273C	0	0.05		COSM10659	large_intestine(141); vulva(8); pleura(1); peritoneum(1); endometrium(20); lung(17); skin(12); kidney(2); thyroid(4); cervix(5); eye(1); central_nervous_system(177); genital_tract(1); oesophagus(28); upper_aerodigestive_tract(33); biliary_tract(7); stomach(36); soft_tissue(2); urinary_tract(13); breast(28); penis(1); prostate(15); pancreas(23); adrenal_gland(4); salivary_gland(1); small_intestine…	1	rs121913343	0	This gene encodes a tumor suppressor protein containing transcriptional activation, DNA binding, and	4200	http://www.ncbi.nlm.nih.gov/pubmed?term=TP53[TIAB]+AND+cancer[MH]													../MuPIT_Interactive?gm=chr17:7673803	Yes								Wee1 inhibitors	0	intron	TP53	ENST00000413465.6(intron)	0.00253	0.05
4	TP53-4	chr17	7577121	-	C	T	central_nervous_system	TP53	MS	R273C	0	0.05		COSM10659	large_intestine(141); vulva(8); pleura(1); peritoneum(1); endometrium(20); lung(17); skin(12); kidney(2); thyroid(4); cervix(5); eye(1); central_nervous_system(177); genital_tract(1); oesophagus(28); upper_aerodigestive_tract(33); biliary_tract(7); stomach(36); soft_tissue(2); urinary_tract(13); breast(28); penis(1); prostate(15); pancreas(23); adrenal_gland(4); salivary_gland(1); small_intestine…	1	rs121913343	0	This gene encodes a tumor suppressor protein containing transcriptional activation, DNA binding, and	4200	http://www.ncbi.nlm.nih.gov/pubmed?term=TP53[TIAB]+AND+cancer[MH]													../MuPIT_Interactive?gm=chr17:7673803	Yes								Wee1 inhibitors	0	intron	TP53	ENST00000413465.6(intron)	0.00253	0.05
5	TP53-5	chr17	7578190	-	A	G	central_nervous_system	TP53	MS	Y220C	0	0.05	Pathogenic/Likely pathogenic	COSM10758	upper_aerodigestive_tract(31); peritoneum(1); stomach(15); soft_tissue(9); central_nervous_system(24); small_intestine(3); haematopoietic_and_lymphoid_tissue(28); liver(11); biliary_tract(3); large_intestine(23); urinary_tract(15); salivary_gland(2); oesophagus(34); endometrium(4); skin(2); lung(25); ovary(46); pancreas(11); prostate(9); bone(2); breast(42)	1	rs121912666	0	This gene encodes a tumor suppressor protein containing transcriptional activation, DNA binding, and	4200	http://www.ncbi.nlm.nih.gov/pubmed?term=TP53[TIAB]+AND+cancer[MH]													../MuPIT_Interactive?gm=chr17:7674872									Wee1 inhibitors	0				0.0082	0.05
6	TP53-6	chr17	7577580	-	A	G	central_nervous_system	TP53	MS	Y234C	0	0.05	Pathogenic/Likely pathogenic	COSM10725	upper_aerodigestive_tract(2); adrenal_gland(1); biliary_tract(3); stomach(2); soft_tissue(1); central_nervous_system(11); cervix(2); haematopoietic_and_lymphoid_tissue(12); large_intestine(6); urinary_tract(8); lung(18); liver(4); oesophagus(7); ovary(11); pancreas(1); prostate(1); kidney(1); breast(17)	1	rs587780073	0	This gene encodes a tumor suppressor protein containing transcriptional activation, DNA binding, and	4200	http://www.ncbi.nlm.nih.gov/pubmed?term=TP53[TIAB]+AND+cancer[MH]													../MuPIT_Interactive?gm=chr17:7674262	Yes								Wee1 inhibitors	0				0.01599	0.05
7	TP53-7	chr17	7577574	-	A	G	central_nervous_system	TP53	MS	Y236C	0	0.05		COSM10731	upper_aerodigestive_tract(3); large_intestine(4); stomach(7); soft_tissue(1); central_nervous_system(3); haematopoietic_and_lymphoid_tissue(4); liver(2); biliary_tract(1); endometrium(1); urinary_tract(4); lung(4); breast(8); oesophagus(9); ovary(9); prostate(2); pancreas(3)	1		0	This gene encodes a tumor suppressor protein containing transcriptional activation, DNA binding, and	4200	http://www.ncbi.nlm.nih.gov/pubmed?term=TP53[TIAB]+AND+cancer[MH]													../MuPIT_Interactive?gm=chr17:7674256	Yes								Wee1 inhibitors	0				0.01093	0.05
8	TP53-8	chr17	7577121	-	C	T	central_nervous_system	TP53	MS	R273C	0	0.05		COSM10659	large_intestine(141); vulva(8); pleura(1); peritoneum(1); endometrium(20); lung(17); skin(12); kidney(2); thyroid(4); cervix(5); eye(1); central_nervous_system(177); genital_tract(1); oesophagus(28); upper_aerodigestive_tract(33); biliary_tract(7); stomach(36); soft_tissue(2); urinary_tract(13); breast(28); penis(1); prostate(15); pancreas(23); adrenal_gland(4); salivary_gland(1); small_intestine…	1	rs121913343	0	This gene encodes a tumor suppressor protein containing transcriptional activation, DNA binding, and	4200	http://www.ncbi.nlm.nih.gov/pubmed?term=TP53[TIAB]+AND+cancer[MH]													../MuPIT_Interactive?gm=chr17:7673803	Yes								Wee1 inhibitors	0	intron	TP53	ENST00000413465.6(intron)	0.00253	0.05
9	TP53-9	chr17	7577121	-	C	T	central_nervous_system	TP53	MS	R273C	0	0.05		COSM10659	large_intestine(141); vulva(8); pleura(1); peritoneum(1); endometrium(20); lung(17); skin(12); kidney(2); thyroid(4); cervix(5); eye(1); central_nervous_system(177); genital_tract(1); oesophagus(28); upper_aerodigestive_tract(33); biliary_tract(7); stomach(36); soft_tissue(2); urinary_tract(13); breast(28); penis(1); prostate(15); pancreas(23); adrenal_gland(4); salivary_gland(1); small_intestine…	1	rs121913343	0	This gene encodes a tumor suppressor protein containing transcriptional activation, DNA binding, and	4200	http://www.ncbi.nlm.nih.gov/pubmed?term=TP53[TIAB]+AND+cancer[MH]													../MuPIT_Interactive?gm=chr17:7673803	Yes								Wee1 inhibitors	0	intron	TP53	ENST00000413465.6(intron)	0.00253	0.05
10	TP53-10	chr17	7577538	-	G	A	central_nervous_system	TP53	MS	R248Q	0	0.05	Pathogenic/Likely pathogenic	COSM10662	large_intestine(169); vulva(8); pleura(1); peritoneum(1); endometrium(18); lung(32); skin(18); kidney(4); thyroid(5); cervix(4); eye(1); central_nervous_system(54); oesophagus(47); NS(5); upper_aerodigestive_tract(46); biliary_tract(7); stomach(49); soft_tissue(2); urinary_tract(37); liver(9); prostate(25); ovary(37); pancreas(21); adrenal_gland(3); salivary_gland(2); small_intestine(9); haematop…	1	rs11540652	5.81395e-05	This gene encodes a tumor suppressor protein containing transcriptional activation, DNA binding, and	4200	http://www.ncbi.nlm.nih.gov/pubmed?term=TP53[TIAB]+AND+cancer[MH]													../MuPIT_Interactive?gm=chr17:7674220	Yes								Wee1 inhibitors	0				0.00445	0.05
11	TP53-11	chr17	7576853	-	G	T	central_nervous_system	TP53	MS	Q331H	0.351	0.5		COSM96339	pancreas(2); lung(2); liver(1); endometrium(1); breast(1)	1	rs11575996	0	This gene encodes a tumor suppressor protein containing transcriptional activation, DNA binding, and	4200	http://www.ncbi.nlm.nih.gov/pubmed?term=TP53[TIAB]+AND+cancer[MH]													../MuPIT_Interactive?gm=chr17:7673535	Yes								Wee1 inhibitors	0	intron	TP53	ENST00000413465.6(intron)	0.22923	0.35
12	TP53-12	chr17	7579350	-	T	G	central_nervous_system	TP53	MS	F113V	0	0.05		COSM11498	upper_aerodigestive_tract(1); central_nervous_system(1); lung(1); breast(1); oesophagus(1); ovary(1)	1	rs587781642	0	This gene encodes a tumor suppressor protein containing transcriptional activation, DNA binding, and	4200	http://www.ncbi.nlm.nih.gov/pubmed?term=TP53[TIAB]+AND+cancer[MH]													../MuPIT_Interactive?gm=chr17:7676032									Wee1 inhibitors	0	intron	TP53	ENST00000504290.5(2k downstream),ENST00000504937.5(2k downstream),ENST00000510385.5(2k downstream),ENST00000610623.4(2k downstream),ENST00000618944.4(2k downstream),ENST00000619186.4(2k downstream),ENST00000615910.4(intron)	0.03178	0.1
13	TP53-13	chr17	7577121	-	C	T	central_nervous_system	TP53	MS	R273C	0	0.05		COSM10659	large_intestine(141); vulva(8); pleura(1); peritoneum(1); endometrium(20); lung(17); skin(12); kidney(2); thyroid(4); cervix(5); eye(1); central_nervous_system(177); genital_tract(1); oesophagus(28); upper_aerodigestive_tract(33); biliary_tract(7); stomach(36); soft_tissue(2); urinary_tract(13); breast(28); penis(1); prostate(15); pancreas(23); adrenal_gland(4); salivary_gland(1); small_intestine…	1	rs121913343	0	This gene encodes a tumor suppressor protein containing transcriptional activation, DNA binding, and	4200	http://www.ncbi.nlm.nih.gov/pubmed?term=TP53[TIAB]+AND+cancer[MH]													../MuPIT_Interactive?gm=chr17:7673803	Yes								Wee1 inhibitors	0	intron	TP53	ENST00000413465.6(intron)	0.00253	0.05
14	TP53-14	chr17	7578415	-	T	G	central_nervous_system	TP53	MS	V172G	0	0.05		COSM45047	stomach(1); lung(1); liver(2); central_nervous_system(1)	1		0	This gene encodes a tumor suppressor protein containing transcriptional activation, DNA binding, and	4200	http://www.ncbi.nlm.nih.gov/pubmed?term=TP53[TIAB]+AND+cancer[MH]													../MuPIT_Interactive?gm=chr17:7675097	Yes								Wee1 inhibitors	0				0.08268	0.15
15	TP53-15	chr17	7578400	-	C	G	central_nervous_system	TP53	MS	P177R	0	0.05		COSM10651	upper_aerodigestive_tract(1); large_intestine(2); stomach(4); central_nervous_system(3); lung(1); liver(1); ovary(1); pancreas(2); prostate(1); breast(2)	1	rs751477326	0	This gene encodes a tumor suppressor protein containing transcriptional activation, DNA binding, and	4200	http://www.ncbi.nlm.nih.gov/pubmed?term=TP53[TIAB]+AND+cancer[MH]													../MuPIT_Interactive?gm=chr17:7675082	Yes								Wee1 inhibitors	0				0.01214	0.05
16	TP53-16	chr17	7578406	-	G	A	central_nervous_system	TP53	MS	R175H	0	0.05	Pathogenic/Likely pathogenic, not provided	COSM10648	large_intestine(367); vulva(5); peritoneum(1); endometrium(14); lung(16); skin(6); kidney(7); thyroid(2); cervix(4); central_nervous_system(80); oesophagus(91); NS(2); upper_aerodigestive_tract(74); biliary_tract(14); stomach(75); soft_tissue(2); urinary_tract(28); liver(14); penis(1); prostate(8); pancreas(46); adrenal_gland(4); salivary_gland(10); small_intestine(1); haematopoietic_and_lymphoid…	1	rs28934578	0	This gene encodes a tumor suppressor protein containing transcriptional activation, DNA binding, and	4200	http://www.ncbi.nlm.nih.gov/pubmed?term=TP53[TIAB]+AND+cancer[MH]													../MuPIT_Interactive?gm=chr17:7675088	Yes								Wee1 inhibitors	0				0.00536	0.05
17	TP53-17	chr17	7577124	-	G	A	central_nervous_system	TP53	MS	V272M	0	0.05		COSM10891	upper_aerodigestive_tract(3); large_intestine(18); vulva(1); stomach(7); soft_tissue(1); central_nervous_system(5); haematopoietic_and_lymphoid_tissue(9); kidney(2); endometrium(1); urinary_tract(2); oesophagus(12); liver(2); skin(1); lung(6); ovary(14); pancreas(8); bone(1); breast(12)	1	rs121912657	0	This gene encodes a tumor suppressor protein containing transcriptional activation, DNA binding, and	4200	http://www.ncbi.nlm.nih.gov/pubmed?term=TP53[TIAB]+AND+cancer[MH]													../MuPIT_Interactive?gm=chr17:7673806	Yes								Wee1 inhibitors	0	intron	TP53	ENST00000413465.6(intron)	0.05678	0.15
18	TP53-18	chr17	7577121	-	C	T	central_nervous_system	TP53	MS	R273C	0	0.05		COSM10659	large_intestine(141); vulva(8); pleura(1); peritoneum(1); endometrium(20); lung(17); skin(12); kidney(2); thyroid(4); cervix(5); eye(1); central_nervous_system(177); genital_tract(1); oesophagus(28); upper_aerodigestive_tract(33); biliary_tract(7); stomach(36); soft_tissue(2); urinary_tract(13); breast(28); penis(1); prostate(15); pancreas(23); adrenal_gland(4); salivary_gland(1); small_intestine…	1	rs121913343	0	This gene encodes a tumor suppressor protein containing transcriptional activation, DNA binding, and	4200	http://www.ncbi.nlm.nih.gov/pubmed?term=TP53[TIAB]+AND+cancer[MH]													../MuPIT_Interactive?gm=chr17:7673803	Yes								Wee1 inhibitors	0	intron	TP53	ENST00000413465.6(intron)	0.00253	0.05
19	TP53-19	chr17	7577121	-	C	T	central_nervous_system	TP53	MS	R273C	0	0.05		COSM10659	large_intestine(141); vulva(8); pleura(1); peritoneum(1); endometrium(20); lung(17); skin(12); kidney(2); thyroid(4); cervix(5); eye(1); central_nervous_system(177); genital_tract(1); oesophagus(28); upper_aerodigestive_tract(33); biliary_tract(7); stomach(36); soft_tissue(2); urinary_tract(13); breast(28); penis(1); prostate(15); pancreas(23); adrenal_gland(4); salivary_gland(1); small_intestine…	1	rs121913343	0	This gene encodes a tumor suppressor protein containing transcriptional activation, DNA binding, and	4200	http://www.ncbi.nlm.nih.gov/pubmed?term=TP53[TIAB]+AND+cancer[MH]													../MuPIT_Interactive?gm=chr17:7673803	Yes								Wee1 inhibitors	0	intron	TP53	ENST00000413465.6(intron)	0.00253	0.05
20	TP53-20	chr17	7577121	-	C	T	central_nervous_system	TP53	MS	R273C	0	0.05		COSM10659	large_intestine(141); vulva(8); pleura(1); peritoneum(1); endometrium(20); lung(17); skin(12); kidney(2); thyroid(4); cervix(5); eye(1); central_nervous_system(177); genital_tract(1); oesophagus(28); upper_aerodigestive_tract(33); biliary_tract(7); stomach(36); soft_tissue(2); urinary_tract(13); breast(28); penis(1); prostate(15); pancreas(23); adrenal_gland(4); salivary_gland(1); small_intestine…	1	rs121913343	0	This gene encodes a tumor suppressor protein containing transcriptional activation, DNA binding, and	4200	http://www.ncbi.nlm.nih.gov/pubmed?term=TP53[TIAB]+AND+cancer[MH]													../MuPIT_Interactive?gm=chr17:7673803	Yes								Wee1 inhibitors	0	intron	TP53	ENST00000413465.6(intron)	0.00253	0.05
21	TP53-21	chr17	7577547	-	G	T	central_nervous_system	TP53	MS	G245V	0	0.05		COSM11196	upper_aerodigestive_tract(12); large_intestine(7); stomach(1); soft_tissue(1); central_nervous_system(3); haematopoietic_and_lymphoid_tissue(3); salivary_gland(1); endometrium(1); urinary_tract(2); lung(18); liver(5); skin(3); oesophagus(8); ovary(5); pancreas(1); prostate(1); breast(9)	1	rs121912656	0	This gene encodes a tumor suppressor protein containing transcriptional activation, DNA binding, and	4200	http://www.ncbi.nlm.nih.gov/pubmed?term=TP53[TIAB]+AND+cancer[MH]													../MuPIT_Interactive?gm=chr17:7674229	Yes								Wee1 inhibitors	0				0.00253	0.05
22	TP53-22	chr17	7578235	-	A	G	central_nervous_system	TP53	MS	Y205C	0	0.05		COSM43947	upper_aerodigestive_tract(17); large_intestine(6); vulva(2); stomach(1); central_nervous_system(5); haematopoietic_and_lymphoid_tissue(2); biliary_tract(2); endometrium(2); urinary_tract(5); oesophagus(13); liver(4); skin(2); lung(9); ovary(5); pancreas(3); prostate(1); bone(2); breast(5)	1		0	This gene encodes a tumor suppressor protein containing transcriptional activation, DNA binding, and	4200	http://www.ncbi.nlm.nih.gov/pubmed?term=TP53[TIAB]+AND+cancer[MH]													../MuPIT_Interactive?gm=chr17:7674917									Wee1 inhibitors	0				0.00283	0.05
23	TP53-23	chr17	7578394	-	A	G	central_nervous_system	TP53	MS	H179R	0	0.05		COSM10889	upper_aerodigestive_tract(14); cervix(1); large_intestine(14); stomach(3); soft_tissue(3); central_nervous_system(24); haematopoietic_and_lymphoid_tissue(12); liver(1); biliary_tract(4); endometrium(2); urinary_tract(4); salivary_gland(1); oesophagus(24); breast(31); lung(13); ovary(18); prostate(5); pancreas(6)	1		0	This gene encodes a tumor suppressor protein containing transcriptional activation, DNA binding, and	4200	http://www.ncbi.nlm.nih.gov/pubmed?term=TP53[TIAB]+AND+cancer[MH]													../MuPIT_Interactive?gm=chr17:7675076	Yes								Wee1 inhibitors	0				0.01255	0.05
24	TP53-24	chr17	7576897	-	C	T	central_nervous_system	TP53	SG	Q317*				COSM10786	upper_aerodigestive_tract(5); adrenal_gland(1); large_intestine(1); stomach(2); central_nervous_system(1); haematopoietic_and_lymphoid_tissue(5); urinary_tract(3); lung(2); liver(1); skin(11); oesophagus(5); ovary(2); pancreas(5); thyroid(1); bone(1); breast(6)	1		0	This gene encodes a tumor suppressor protein containing transcriptional activation, DNA binding, and	4200	http://www.ncbi.nlm.nih.gov/pubmed?term=TP53[TIAB]+AND+cancer[MH]																						Wee1 inhibitors	0	intron	TP53	ENST00000413465.6(intron)	0.12289	0.2
25	TP53-25	chr17	7577099	-	G	A	central_nervous_system	TP53	MS	R280K	0	0.05		COSM10728	upper_aerodigestive_tract(3); cervix(1); biliary_tract(3); stomach(1); central_nervous_system(4); haematopoietic_and_lymphoid_tissue(2); large_intestine(2); endometrium(1); urinary_tract(20); salivary_gland(1); oesophagus(4); breast(14); skin(8); lung(4); ovary(1); NS(1); prostate(1); pancreas(2)	1		0	This gene encodes a tumor suppressor protein containing transcriptional activation, DNA binding, and	4200	http://www.ncbi.nlm.nih.gov/pubmed?term=TP53[TIAB]+AND+cancer[MH]													../MuPIT_Interactive?gm=chr17:7673781	Yes								Wee1 inhibitors	0	intron	TP53	ENST00000413465.6(intron)	0.00314	0.05
26	TP53-26	chr17	7577548	-	G	A	central_nervous_system	TP53	MS	G245S	0	0.05	Pathogenic/Likely pathogenic	COSM6932	large_intestine(127); vulva(5); endometrium(3); lung(10); skin(8); kidney(1); cervix(1); central_nervous_system(30); oesophagus(24); upper_aerodigestive_tract(15); biliary_tract(2); stomach(43); soft_tissue(1); urinary_tract(12); breast(32); prostate(6); pancreas(15); salivary_gland(2); small_intestine(4); haematopoietic_and_lymphoid_tissue(25); ovary(26); liver(4)	1	rs28934575	5.81395e-05	This gene encodes a tumor suppressor protein containing transcriptional activation, DNA binding, and	4200	http://www.ncbi.nlm.nih.gov/pubmed?term=TP53[TIAB]+AND+cancer[MH]													../MuPIT_Interactive?gm=chr17:7674230	Yes								Wee1 inhibitors	0				0.00779	0.05
27	TP53-27	chr17	7577120	-	G	A	central_nervous_system	TP53	MS	R273H	0	0.05	Pathogenic/Likely pathogenic	COSM10660	large_intestine(170); vulva(3); endometrium(14); lung(77); skin(13); cervix(1); central_nervous_system(60); genital_tract(2); oesophagus(43); NS(2); upper_aerodigestive_tract(48); biliary_tract(6); stomach(30); soft_tissue(4); fallopian_tube(1); urinary_tract(19); liver(5); penis(4); prostate(12); pancreas(43); salivary_gland(2); haematopoietic_and_lymphoid_tissue(42); thymus(2); ovary(59); bone(…	1	rs28934576	0	This gene encodes a tumor suppressor protein containing transcriptional activation, DNA binding, and	4200	http://www.ncbi.nlm.nih.gov/pubmed?term=TP53[TIAB]+AND+cancer[MH]													../MuPIT_Interactive?gm=chr17:7673802	Yes								Wee1 inhibitors	0.000199681	intron	TP53	ENST00000413465.6(intron)	0.00283	0.05
28	TP53-28	chr17	7578431	-	C	T	central_nervous_system	TP53	SG	Q167*				COSM11333	upper_aerodigestive_tract(2); cervix(1); large_intestine(7); stomach(1); soft_tissue(1); central_nervous_system(1); haematopoietic_and_lymphoid_tissue(1); urinary_tract(3); lung(2); breast(2); oesophagus(7); liver(2)	1		0	This gene encodes a tumor suppressor protein containing transcriptional activation, DNA binding, and	4200	http://www.ncbi.nlm.nih.gov/pubmed?term=TP53[TIAB]+AND+cancer[MH]																						Wee1 inhibitors	0				0.05527	0.15
29	TP53-29	chr17	7578272	-	C	G	central_nervous_system	TP53	MS	H193D	0	0.05		COSM44002	upper_aerodigestive_tract(2); central_nervous_system(1); haematopoietic_and_lymphoid_tissue(3); lung(2); liver(2); ovary(1); prostate(1); breast(1)	1		0	This gene encodes a tumor suppressor protein containing transcriptional activation, DNA binding, and	4200	http://www.ncbi.nlm.nih.gov/pubmed?term=TP53[TIAB]+AND+cancer[MH]													../MuPIT_Interactive?gm=chr17:7674954	Yes								Wee1 inhibitors	0				0.00283	0.05
30	TP53-30	chr17	7578403	-	G	T	central_nervous_system	TP53	MS	C176F	0	0.05		COSM10645	large_intestine(19); vulva(1); pleura(1); endometrium(1); lung(17); skin(1); central_nervous_system(4); genital_tract(2); oesophagus(26); upper_aerodigestive_tract(25); stomach(18); soft_tissue(3); urinary_tract(7); breast(11); prostate(3); pancreas(4); adrenal_gland(2); salivary_gland(1); haematopoietic_and_lymphoid_tissue(3); ovary(6); bone(6); liver(7)	1		0	This gene encodes a tumor suppressor protein containing transcriptional activation, DNA binding, and	4200	http://www.ncbi.nlm.nih.gov/pubmed?term=TP53[TIAB]+AND+cancer[MH]													../MuPIT_Interactive?gm=chr17:7675085	Yes								Wee1 inhibitors	0				0.00223	0.05
31	TP53-31	chr17	7578403	-	G	T	central_nervous_system	TP53	MS	C176F	0	0.05		COSM10645	large_intestine(19); vulva(1); pleura(1); endometrium(1); lung(17); skin(1); central_nervous_system(4); genital_tract(2); oesophagus(26); upper_aerodigestive_tract(25); stomach(18); soft_tissue(3); urinary_tract(7); breast(11); prostate(3); pancreas(4); adrenal_gland(2); salivary_gland(1); haematopoietic_and_lymphoid_tissue(3); ovary(6); bone(6); liver(7)	1		0	This gene encodes a tumor suppressor protein containing transcriptional activation, DNA binding, and	4200	http://www.ncbi.nlm.nih.gov/pubmed?term=TP53[TIAB]+AND+cancer[MH]													../MuPIT_Interactive?gm=chr17:7675085	Yes								Wee1 inhibitors	0				0.00223	0.05
32	TP53-32	chr17	7579528	-	G	A	central_nervous_system	TP53	SG	W53*			Pathogenic	COSM44488	upper_aerodigestive_tract(7); large_intestine(1); stomach(1); haematopoietic_and_lymphoid_tissue(1); biliary_tract(2); oesophagus(1); breast(2); skin(2); ovary(3); pancreas(2)	1		0	This gene encodes a tumor suppressor protein containing transcriptional activation, DNA binding, and	4200	http://www.ncbi.nlm.nih.gov/pubmed?term=TP53[TIAB]+AND+cancer[MH]																						Wee1 inhibitors	0	2k downstream	TP53	ENST00000504290.5(2k downstream),ENST00000504937.5(2k downstream),ENST00000510385.5(2k downstream),ENST00000610623.4(2k downstream),ENST00000618944.4(2k downstream),ENST00000619186.4(2k downstream)	0.08994	0.2
33	TP53-33	chr17	7577545	-	A	G	central_nervous_system	TP53	MS	M246V	0	0.05	Pathogenic/Likely pathogenic	COSM43555	upper_aerodigestive_tract(3); adrenal_gland(1); large_intestine(4); stomach(1); soft_tissue(2); central_nervous_system(2); small_intestine(1); haematopoietic_and_lymphoid_tissue(6); urinary_tract(1); lung(4); liver(13); oesophagus(6); ovary(2); pancreas(2); prostate(1); breast(1)	1	rs483352695	0	This gene encodes a tumor suppressor protein containing transcriptional activation, DNA binding, and	4200	http://www.ncbi.nlm.nih.gov/pubmed?term=TP53[TIAB]+AND+cancer[MH]													../MuPIT_Interactive?gm=chr17:7674227	Yes								Wee1 inhibitors	0				0.0082	0.05
34	TP53-34	chr17	7577121	-	C	T	central_nervous_system	TP53	MS	R273C	0	0.05		COSM10659	large_intestine(141); vulva(8); pleura(1); peritoneum(1); endometrium(20); lung(17); skin(12); kidney(2); thyroid(4); cervix(5); eye(1); central_nervous_system(177); genital_tract(1); oesophagus(28); upper_aerodigestive_tract(33); biliary_tract(7); stomach(36); soft_tissue(2); urinary_tract(13); breast(28); penis(1); prostate(15); pancreas(23); adrenal_gland(4); salivary_gland(1); small_intestine…	1	rs121913343	0	This gene encodes a tumor suppressor protein containing transcriptional activation, DNA binding, and	4200	http://www.ncbi.nlm.nih.gov/pubmed?term=TP53[TIAB]+AND+cancer[MH]													../MuPIT_Interactive?gm=chr17:7673803	Yes								Wee1 inhibitors	0	intron	TP53	ENST00000413465.6(intron)	0.00253	0.05
35	TP53-35	chr17	7577142	-	G	A	central_nervous_system	TP53	MS	G266R	0	0.05		COSM10794	upper_aerodigestive_tract(2); adrenal_gland(1); large_intestine(5); stomach(2); central_nervous_system(4); haematopoietic_and_lymphoid_tissue(1); liver(4); peritoneum(1); endometrium(1); biliary_tract(1); urinary_tract(4); oesophagus(4); breast(3); skin(7); lung(4); ovary(4); prostate(1); pancreas(3)	1		0	This gene encodes a tumor suppressor protein containing transcriptional activation, DNA binding, and	4200	http://www.ncbi.nlm.nih.gov/pubmed?term=TP53[TIAB]+AND+cancer[MH]													../MuPIT_Interactive?gm=chr17:7673824									Wee1 inhibitors	0	intron	TP53	ENST00000413465.6(intron)	0.00354	0.05
36	TP53-36	chr17	7577100	-	A	G	central_nervous_system	TP53	MS	R280G	0	0.05		COSM11123	upper_aerodigestive_tract(3); stomach(2); central_nervous_system(3); haematopoietic_and_lymphoid_tissue(4); thymus(1); endometrium(1); urinary_tract(2); liver(5); lung(2); breast(2); ovary(3); bone(1); pancreas(3)	1		0	This gene encodes a tumor suppressor protein containing transcriptional activation, DNA binding, and	4200	http://www.ncbi.nlm.nih.gov/pubmed?term=TP53[TIAB]+AND+cancer[MH]													../MuPIT_Interactive?gm=chr17:7673782	Yes								Wee1 inhibitors	0	intron	TP53	ENST00000413465.6(intron)	0.00253	0.05
37	TP53-37	chr17	7578517	-	C	T	central_nervous_system	TP53	MS	A138V	0	0.05		COSM43818	large_intestine(7); vulva(1); stomach(3); soft_tissue(1); haematopoietic_and_lymphoid_tissue(4); endometrium(2); lung(1); breast(2); skin(1); oesophagus(1); ovary(2); liver(3)	1	rs750600586	0	This gene encodes a tumor suppressor protein containing transcriptional activation, DNA binding, and	4200	http://www.ncbi.nlm.nih.gov/pubmed?term=TP53[TIAB]+AND+cancer[MH]													../MuPIT_Interactive?gm=chr17:7675199									Wee1 inhibitors	0	3' UTR	TP53	ENST00000610623.4(3' UTR),ENST00000618944.4(3' UTR),ENST00000619186.4(3' UTR)	0.00982	0.05
38	TP53-38	chr17	7577121	-	C	T	central_nervous_system	TP53	MS	R273C	0	0.05		COSM10659	large_intestine(141); vulva(8); pleura(1); peritoneum(1); endometrium(20); lung(17); skin(12); kidney(2); thyroid(4); cervix(5); eye(1); central_nervous_system(177); genital_tract(1); oesophagus(28); upper_aerodigestive_tract(33); biliary_tract(7); stomach(36); soft_tissue(2); urinary_tract(13); breast(28); penis(1); prostate(15); pancreas(23); adrenal_gland(4); salivary_gland(1); small_intestine…	1	rs121913343	0	This gene encodes a tumor suppressor protein containing transcriptional activation, DNA binding, and	4200	http://www.ncbi.nlm.nih.gov/pubmed?term=TP53[TIAB]+AND+cancer[MH]													../MuPIT_Interactive?gm=chr17:7673803	Yes								Wee1 inhibitors	0	intron	TP53	ENST00000413465.6(intron)	0.00253	0.05
39	TP53-39	chr17	7578281	-	C	T	central_nervous_system	TP53	MS	P190S	0	0.05		COSM44682	upper_aerodigestive_tract(1); large_intestine(1); central_nervous_system(2); breast(1); skin(2); ovary(2)	1		0	This gene encodes a tumor suppressor protein containing transcriptional activation, DNA binding, and	4200	http://www.ncbi.nlm.nih.gov/pubmed?term=TP53[TIAB]+AND+cancer[MH]													../MuPIT_Interactive?gm=chr17:7674963	Yes								Wee1 inhibitors	0				0.04989	0.1
40	TP53-40	chr17	7577121	-	C	T	central_nervous_system	TP53	MS	R273C	0	0.05		COSM10659	large_intestine(141); vulva(8); pleura(1); peritoneum(1); endometrium(20); lung(17); skin(12); kidney(2); thyroid(4); cervix(5); eye(1); central_nervous_system(177); genital_tract(1); oesophagus(28); upper_aerodigestive_tract(33); biliary_tract(7); stomach(36); soft_tissue(2); urinary_tract(13); breast(28); penis(1); prostate(15); pancreas(23); adrenal_gland(4); salivary_gland(1); small_intestine…	1	rs121913343	0	This gene encodes a tumor suppressor protein containing transcriptional activation, DNA binding, and	4200	http://www.ncbi.nlm.nih.gov/pubmed?term=TP53[TIAB]+AND+cancer[MH]													../MuPIT_Interactive?gm=chr17:7673803	Yes								Wee1 inhibitors	0	intron	TP53	ENST00000413465.6(intron)	0.00253	0.05
41	TP53-41	chr17	7577121	-	C	T	central_nervous_system	TP53	MS	R273C	0	0.05		COSM10659	large_intestine(141); vulva(8); pleura(1); peritoneum(1); endometrium(20); lung(17); skin(12); kidney(2); thyroid(4); cervix(5); eye(1); central_nervous_system(177); genital_tract(1); oesophagus(28); upper_aerodigestive_tract(33); biliary_tract(7); stomach(36); soft_tissue(2); urinary_tract(13); breast(28); penis(1); prostate(15); pancreas(23); adrenal_gland(4); salivary_gland(1); small_intestine…	1	rs121913343	0	This gene encodes a tumor suppressor protein containing transcriptional activation, DNA binding, and	4200	http://www.ncbi.nlm.nih.gov/pubmed?term=TP53[TIAB]+AND+cancer[MH]													../MuPIT_Interactive?gm=chr17:7673803	Yes								Wee1 inhibitors	0	intron	TP53	ENST00000413465.6(intron)	0.00253	0.05
42	TP53-42	chr17	7577121	-	C	T	central_nervous_system	TP53	MS	R273C	0	0.05		COSM10659	large_intestine(141); vulva(8); pleura(1); peritoneum(1); endometrium(20); lung(17); skin(12); kidney(2); thyroid(4); cervix(5); eye(1); central_nervous_system(177); genital_tract(1); oesophagus(28); upper_aerodigestive_tract(33); biliary_tract(7); stomach(36); soft_tissue(2); urinary_tract(13); breast(28); penis(1); prostate(15); pancreas(23); adrenal_gland(4); salivary_gland(1); small_intestine…	1	rs121913343	0	This gene encodes a tumor suppressor protein containing transcriptional activation, DNA binding, and	4200	http://www.ncbi.nlm.nih.gov/pubmed?term=TP53[TIAB]+AND+cancer[MH]													../MuPIT_Interactive?gm=chr17:7673803	Yes								Wee1 inhibitors	0	intron	TP53	ENST00000413465.6(intron)	0.00253	0.05
43	TP53-43	chr17	7577111	-	C	A	central_nervous_system	TP53	MS	A276D	0	0.05		COSM45268	soft_tissue(3); central_nervous_system(2); endometrium(1); urinary_tract(1); lung(3); breast(1); oesophagus(1)	1		0	This gene encodes a tumor suppressor protein containing transcriptional activation, DNA binding, and	4200	http://www.ncbi.nlm.nih.gov/pubmed?term=TP53[TIAB]+AND+cancer[MH]													../MuPIT_Interactive?gm=chr17:7673793	Yes								Wee1 inhibitors	0	intron	TP53	ENST00000413465.6(intron)	0.00607	0.05
44	TP53-44	chr17	7578272	-	C	T	central_nervous_system	TP53	MS	H193Y	0	0.05		COSM10672	upper_aerodigestive_tract(5); adrenal_gland(1); biliary_tract(1); stomach(1); soft_tissue(1); central_nervous_system(3); haematopoietic_and_lymphoid_tissue(4); thymus(1); large_intestine(5); urinary_tract(3); salivary_gland(1); kidney(1); oesophagus(8); breast(4); lung(4); ovary(2); pancreas(6); prostate(1); bone(1); liver(1)	1		0	This gene encodes a tumor suppressor protein containing transcriptional activation, DNA binding, and	4200	http://www.ncbi.nlm.nih.gov/pubmed?term=TP53[TIAB]+AND+cancer[MH]													../MuPIT_Interactive?gm=chr17:7674954	Yes								Wee1 inhibitors	0				0.00395	0.05
45	TP53-45	chr17	7577111	-	C	A	central_nervous_system	TP53	MS	A276D	0	0.05		COSM45268	soft_tissue(3); central_nervous_system(2); endometrium(1); urinary_tract(1); lung(3); breast(1); oesophagus(1)	1		0	This gene encodes a tumor suppressor protein containing transcriptional activation, DNA binding, and	4200	http://www.ncbi.nlm.nih.gov/pubmed?term=TP53[TIAB]+AND+cancer[MH]													../MuPIT_Interactive?gm=chr17:7673793	Yes								Wee1 inhibitors	0	intron	TP53	ENST00000413465.6(intron)	0.00607	0.05
46	TP53-46	chr17	7578272	-	C	T	central_nervous_system	TP53	MS	H193Y	0	0.05		COSM10672	upper_aerodigestive_tract(5); adrenal_gland(1); biliary_tract(1); stomach(1); soft_tissue(1); central_nervous_system(3); haematopoietic_and_lymphoid_tissue(4); thymus(1); large_intestine(5); urinary_tract(3); salivary_gland(1); kidney(1); oesophagus(8); breast(4); lung(4); ovary(2); pancreas(6); prostate(1); bone(1); liver(1)	1		0	This gene encodes a tumor suppressor protein containing transcriptional activation, DNA binding, and	4200	http://www.ncbi.nlm.nih.gov/pubmed?term=TP53[TIAB]+AND+cancer[MH]													../MuPIT_Interactive?gm=chr17:7674954	Yes								Wee1 inhibitors	0				0.00395	0.05
47	TP53-47	chr17	7577121	-	C	T	central_nervous_system	TP53	MS	R273C	0	0.05		COSM10659	large_intestine(141); vulva(8); pleura(1); peritoneum(1); endometrium(20); lung(17); skin(12); kidney(2); thyroid(4); cervix(5); eye(1); central_nervous_system(177); genital_tract(1); oesophagus(28); upper_aerodigestive_tract(33); biliary_tract(7); stomach(36); soft_tissue(2); urinary_tract(13); breast(28); penis(1); prostate(15); pancreas(23); adrenal_gland(4); salivary_gland(1); small_intestine…	1	rs121913343	0	This gene encodes a tumor suppressor protein containing transcriptional activation, DNA binding, and	4200	http://www.ncbi.nlm.nih.gov/pubmed?term=TP53[TIAB]+AND+cancer[MH]													../MuPIT_Interactive?gm=chr17:7673803	Yes								Wee1 inhibitors	0	intron	TP53	ENST00000413465.6(intron)	0.00253	0.05
48	TP53-48	chr17	7577121	-	C	T	central_nervous_system	TP53	MS	R273C	0	0.05		COSM10659	large_intestine(141); vulva(8); pleura(1); peritoneum(1); endometrium(20); lung(17); skin(12); kidney(2); thyroid(4); cervix(5); eye(1); central_nervous_system(177); genital_tract(1); oesophagus(28); upper_aerodigestive_tract(33); biliary_tract(7); stomach(36); soft_tissue(2); urinary_tract(13); breast(28); penis(1); prostate(15); pancreas(23); adrenal_gland(4); salivary_gland(1); small_intestine…	1	rs121913343	0	This gene encodes a tumor suppressor protein containing transcriptional activation, DNA binding, and	4200	http://www.ncbi.nlm.nih.gov/pubmed?term=TP53[TIAB]+AND+cancer[MH]													../MuPIT_Interactive?gm=chr17:7673803	Yes								Wee1 inhibitors	0	intron	TP53	ENST00000413465.6(intron)	0.00253	0.05
49	TP53-49	chr17	7577120	-	G	A	central_nervous_system	TP53	MS	R273H	0	0.05	Pathogenic/Likely pathogenic	COSM10660	large_intestine(170); vulva(3); endometrium(14); lung(77); skin(13); cervix(1); central_nervous_system(60); genital_tract(2); oesophagus(43); NS(2); upper_aerodigestive_tract(48); biliary_tract(6); stomach(30); soft_tissue(4); fallopian_tube(1); urinary_tract(19); liver(5); penis(4); prostate(12); pancreas(43); salivary_gland(2); haematopoietic_and_lymphoid_tissue(42); thymus(2); ovary(59); bone(…	1	rs28934576	0	This gene encodes a tumor suppressor protein containing transcriptional activation, DNA binding, and	4200	http://www.ncbi.nlm.nih.gov/pubmed?term=TP53[TIAB]+AND+cancer[MH]													../MuPIT_Interactive?gm=chr17:7673802	Yes								Wee1 inhibitors	0.000199681	intron	TP53	ENST00000413465.6(intron)	0.00283	0.05
50	TP53-50	chr17	7577547	-	G	A	central_nervous_system	TP53	MS	G245D	0	0.05	Pathogenic/Likely pathogenic	COSM43606	upper_aerodigestive_tract(7); large_intestine(27); vulva(1); stomach(4); central_nervous_system(4); haematopoietic_and_lymphoid_tissue(15); kidney(1); urinary_tract(2); liver(6); lung(7); breast(13); skin(4); oesophagus(26); ovary(11); NS(1); prostate(4); bone(1); pancreas(6)	1	rs121912656	0	This gene encodes a tumor suppressor protein containing transcriptional activation, DNA binding, and	4200	http://www.ncbi.nlm.nih.gov/pubmed?term=TP53[TIAB]+AND+cancer[MH]													../MuPIT_Interactive?gm=chr17:7674229	Yes								Wee1 inhibitors	0				0.00304	0.05
51	TP53-51	chr17	7574012	-	G	T	central_nervous_system	TP53	SG	E339*				COSM11286	upper_aerodigestive_tract(4); adrenal_gland(1); biliary_tract(1); central_nervous_system(4); oesophagus(2); liver(6); breast(3)	1		0	This gene encodes a tumor suppressor protein containing transcriptional activation, DNA binding, and	4200	http://www.ncbi.nlm.nih.gov/pubmed?term=TP53[TIAB]+AND+cancer[MH]																						Wee1 inhibitors	0	intron	TP53	ENST00000413465.6(intron),ENST00000359597.8(intron),ENST00000504290.5(5' UTR),ENST00000510385.5(5' UTR),ENST00000610623.4(5' UTR),ENST00000618944.4(5' UTR),ENST00000617185.4(5' UTR),ENST00000420246.6(5' UTR),ENST00000455263.6(5' UTR),ENST00000610538.4(5' UTR),ENST00000622645.4(5' UTR)	0.03229	0.1
52	TP53-52	chr17	7577544	-	T	G	central_nervous_system	TP53	MS	M246R	0	0.05	Pathogenic	COSM11376	upper_aerodigestive_tract(1); large_intestine(2); central_nervous_system(2); haematopoietic_and_lymphoid_tissue(1); oesophagus(2); breast(3); skin(2)	1	rs587780074	0	This gene encodes a tumor suppressor protein containing transcriptional activation, DNA binding, and	4200	http://www.ncbi.nlm.nih.gov/pubmed?term=TP53[TIAB]+AND+cancer[MH]													../MuPIT_Interactive?gm=chr17:7674226	Yes								Wee1 inhibitors	0				0.00719	0.05
53	TP53-53	chr17	7578406	-	G	A	central_nervous_system	TP53	MS	R175H	0	0.05	Pathogenic/Likely pathogenic, not provided	COSM10648	large_intestine(367); vulva(5); peritoneum(1); endometrium(14); lung(16); skin(6); kidney(7); thyroid(2); cervix(4); central_nervous_system(80); oesophagus(91); NS(2); upper_aerodigestive_tract(74); biliary_tract(14); stomach(75); soft_tissue(2); urinary_tract(28); liver(14); penis(1); prostate(8); pancreas(46); adrenal_gland(4); salivary_gland(10); small_intestine(1); haematopoietic_and_lymphoid…	1	rs28934578	0	This gene encodes a tumor suppressor protein containing transcriptional activation, DNA binding, and	4200	http://www.ncbi.nlm.nih.gov/pubmed?term=TP53[TIAB]+AND+cancer[MH]													../MuPIT_Interactive?gm=chr17:7675088	Yes								Wee1 inhibitors	0				0.00536	0.05
54	TP53-54	chr17	7577121	-	C	T	central_nervous_system	TP53	MS	R273C	0	0.05		COSM10659	large_intestine(141); vulva(8); pleura(1); peritoneum(1); endometrium(20); lung(17); skin(12); kidney(2); thyroid(4); cervix(5); eye(1); central_nervous_system(177); genital_tract(1); oesophagus(28); upper_aerodigestive_tract(33); biliary_tract(7); stomach(36); soft_tissue(2); urinary_tract(13); breast(28); penis(1); prostate(15); pancreas(23); adrenal_gland(4); salivary_gland(1); small_intestine…	1	rs121913343	0	This gene encodes a tumor suppressor protein containing transcriptional activation, DNA binding, and	4200	http://www.ncbi.nlm.nih.gov/pubmed?term=TP53[TIAB]+AND+cancer[MH]													../MuPIT_Interactive?gm=chr17:7673803	Yes								Wee1 inhibitors	0	intron	TP53	ENST00000413465.6(intron)	0.00253	0.05
55	TP53-55	chr17	7577121	-	C	T	central_nervous_system	TP53	MS	R273C	0	0.05		COSM10659	large_intestine(141); vulva(8); pleura(1); peritoneum(1); endometrium(20); lung(17); skin(12); kidney(2); thyroid(4); cervix(5); eye(1); central_nervous_system(177); genital_tract(1); oesophagus(28); upper_aerodigestive_tract(33); biliary_tract(7); stomach(36); soft_tissue(2); urinary_tract(13); breast(28); penis(1); prostate(15); pancreas(23); adrenal_gland(4); salivary_gland(1); small_intestine…	1	rs121913343	0	This gene encodes a tumor suppressor protein containing transcriptional activation, DNA binding, and	4200	http://www.ncbi.nlm.nih.gov/pubmed?term=TP53[TIAB]+AND+cancer[MH]													../MuPIT_Interactive?gm=chr17:7673803	Yes								Wee1 inhibitors	0	intron	TP53	ENST00000413465.6(intron)	0.00253	0.05
56	TP53-56	chr17	7577120	-	G	A	central_nervous_system	TP53	MS	R273H	0	0.05	Pathogenic/Likely pathogenic	COSM10660	large_intestine(170); vulva(3); endometrium(14); lung(77); skin(13); cervix(1); central_nervous_system(60); genital_tract(2); oesophagus(43); NS(2); upper_aerodigestive_tract(48); biliary_tract(6); stomach(30); soft_tissue(4); fallopian_tube(1); urinary_tract(19); liver(5); penis(4); prostate(12); pancreas(43); salivary_gland(2); haematopoietic_and_lymphoid_tissue(42); thymus(2); ovary(59); bone(…	1	rs28934576	0	This gene encodes a tumor suppressor protein containing transcriptional activation, DNA binding, and	4200	http://www.ncbi.nlm.nih.gov/pubmed?term=TP53[TIAB]+AND+cancer[MH]													../MuPIT_Interactive?gm=chr17:7673802	Yes								Wee1 inhibitors	0.000199681	intron	TP53	ENST00000413465.6(intron)	0.00283	0.05
57	TP53-57	chr17	7577120	-	G	A	central_nervous_system	TP53	MS	R273H	0	0.05	Pathogenic/Likely pathogenic	COSM10660	large_intestine(170); vulva(3); endometrium(14); lung(77); skin(13); cervix(1); central_nervous_system(60); genital_tract(2); oesophagus(43); NS(2); upper_aerodigestive_tract(48); biliary_tract(6); stomach(30); soft_tissue(4); fallopian_tube(1); urinary_tract(19); liver(5); penis(4); prostate(12); pancreas(43); salivary_gland(2); haematopoietic_and_lymphoid_tissue(42); thymus(2); ovary(59); bone(…	1	rs28934576	0	This gene encodes a tumor suppressor protein containing transcriptional activation, DNA binding, and	4200	http://www.ncbi.nlm.nih.gov/pubmed?term=TP53[TIAB]+AND+cancer[MH]													../MuPIT_Interactive?gm=chr17:7673802	Yes								Wee1 inhibitors	0.000199681	intron	TP53	ENST00000413465.6(intron)	0.00283	0.05
58	TP53-58	chr17	7577538	-	G	A	central_nervous_system	TP53	MS	R248Q	0	0.05	Pathogenic/Likely pathogenic	COSM10662	large_intestine(169); vulva(8); pleura(1); peritoneum(1); endometrium(18); lung(32); skin(18); kidney(4); thyroid(5); cervix(4); eye(1); central_nervous_system(54); oesophagus(47); NS(5); upper_aerodigestive_tract(46); biliary_tract(7); stomach(49); soft_tissue(2); urinary_tract(37); liver(9); prostate(25); ovary(37); pancreas(21); adrenal_gland(3); salivary_gland(2); small_intestine(9); haematop…	1	rs11540652	5.81395e-05	This gene encodes a tumor suppressor protein containing transcriptional activation, DNA binding, and	4200	http://www.ncbi.nlm.nih.gov/pubmed?term=TP53[TIAB]+AND+cancer[MH]													../MuPIT_Interactive?gm=chr17:7674220	Yes								Wee1 inhibitors	0				0.00445	0.05
59	TP53-59	chr17	7577538	-	G	A	central_nervous_system	TP53	MS	R248Q	0	0.05	Pathogenic/Likely pathogenic	COSM10662	large_intestine(169); vulva(8); pleura(1); peritoneum(1); endometrium(18); lung(32); skin(18); kidney(4); thyroid(5); cervix(4); eye(1); central_nervous_system(54); oesophagus(47); NS(5); upper_aerodigestive_tract(46); biliary_tract(7); stomach(49); soft_tissue(2); urinary_tract(37); liver(9); prostate(25); ovary(37); pancreas(21); adrenal_gland(3); salivary_gland(2); small_intestine(9); haematop…	1	rs11540652	5.81395e-05	This gene encodes a tumor suppressor protein containing transcriptional activation, DNA binding, and	4200	http://www.ncbi.nlm.nih.gov/pubmed?term=TP53[TIAB]+AND+cancer[MH]													../MuPIT_Interactive?gm=chr17:7674220	Yes								Wee1 inhibitors	0				0.00445	0.05
60	TP53-60	chr17	7577121	-	C	T	central_nervous_system	TP53	MS	R273C	0	0.05		COSM10659	large_intestine(141); vulva(8); pleura(1); peritoneum(1); endometrium(20); lung(17); skin(12); kidney(2); thyroid(4); cervix(5); eye(1); central_nervous_system(177); genital_tract(1); oesophagus(28); upper_aerodigestive_tract(33); biliary_tract(7); stomach(36); soft_tissue(2); urinary_tract(13); breast(28); penis(1); prostate(15); pancreas(23); adrenal_gland(4); salivary_gland(1); small_intestine…	1	rs121913343	0	This gene encodes a tumor suppressor protein containing transcriptional activation, DNA binding, and	4200	http://www.ncbi.nlm.nih.gov/pubmed?term=TP53[TIAB]+AND+cancer[MH]													../MuPIT_Interactive?gm=chr17:7673803	Yes								Wee1 inhibitors	0	intron	TP53	ENST00000413465.6(intron)	0.00253	0.05
61	TP53-61	chr17	7578524	-	C	G	central_nervous_system	TP53	MS	Q136E	0	0.05		COSM43767	stomach(2); central_nervous_system(4); endometrium(1); lung(1); liver(1); breast(1)	1		0	This gene encodes a tumor suppressor protein containing transcriptional activation, DNA binding, and	4200	http://www.ncbi.nlm.nih.gov/pubmed?term=TP53[TIAB]+AND+cancer[MH]													../MuPIT_Interactive?gm=chr17:7675206	Yes								Wee1 inhibitors	0	3' UTR	TP53	ENST00000610623.4(3' UTR),ENST00000618944.4(3' UTR),ENST00000619186.4(3' UTR)	0.03127	0.1
62	TP53-62	chr17	7578524	-	C	G	central_nervous_system	TP53	MS	Q136E	0	0.05		COSM43767	stomach(2); central_nervous_system(4); endometrium(1); lung(1); liver(1); breast(1)	1		0	This gene encodes a tumor suppressor protein containing transcriptional activation, DNA binding, and	4200	http://www.ncbi.nlm.nih.gov/pubmed?term=TP53[TIAB]+AND+cancer[MH]													../MuPIT_Interactive?gm=chr17:7675206	Yes								Wee1 inhibitors	0	3' UTR	TP53	ENST00000610623.4(3' UTR),ENST00000618944.4(3' UTR),ENST00000619186.4(3' UTR)	0.03127	0.1
63	TP53-63	chr17	7577517	-	T	G	central_nervous_system	TP53	MS	I255S	0	0.05		COSM10788	upper_aerodigestive_tract(2); soft_tissue(1); central_nervous_system(2); endometrium(1); urinary_tract(1); oesophagus(2); breast(1); lung(1); ovary(1); bone(1)	1		0	This gene encodes a tumor suppressor protein containing transcriptional activation, DNA binding, and	4200	http://www.ncbi.nlm.nih.gov/pubmed?term=TP53[TIAB]+AND+cancer[MH]													../MuPIT_Interactive?gm=chr17:7674199									Wee1 inhibitors	0				0.00911	0.05
64	TP53-64	chr17	7578263	-	C	T	central_nervous_system	TP53	SG	R196*			Pathogenic	COSM10705	upper_aerodigestive_tract(13); cervix(1); large_intestine(51); stomach(16); soft_tissue(1); central_nervous_system(16); pancreas(14); haematopoietic_and_lymphoid_tissue(17); biliary_tract(4); endometrium(2); urinary_tract(6); oesophagus(25); liver(1); skin(18); lung(8); ovary(12); NS(7); kidney(1); breast(37)	1	rs397516435	0	This gene encodes a tumor suppressor protein containing transcriptional activation, DNA binding, and	4200	http://www.ncbi.nlm.nih.gov/pubmed?term=TP53[TIAB]+AND+cancer[MH]																						Wee1 inhibitors	0				0.00694	0.05
65	TP53-65	chr17	7577517	-	T	G	central_nervous_system	TP53	MS	I255S	0	0.05		COSM10788	upper_aerodigestive_tract(2); soft_tissue(1); central_nervous_system(2); endometrium(1); urinary_tract(1); oesophagus(2); breast(1); lung(1); ovary(1); bone(1)	1		0	This gene encodes a tumor suppressor protein containing transcriptional activation, DNA binding, and	4200	http://www.ncbi.nlm.nih.gov/pubmed?term=TP53[TIAB]+AND+cancer[MH]													../MuPIT_Interactive?gm=chr17:7674199									Wee1 inhibitors	0				0.00911	0.05
66	TP53-66	chr17	7578263	-	C	T	central_nervous_system	TP53	SG	R196*			Pathogenic	COSM10705	upper_aerodigestive_tract(13); cervix(1); large_intestine(51); stomach(16); soft_tissue(1); central_nervous_system(16); pancreas(14); haematopoietic_and_lymphoid_tissue(17); biliary_tract(4); endometrium(2); urinary_tract(6); oesophagus(25); liver(1); skin(18); lung(8); ovary(12); NS(7); kidney(1); breast(37)	1	rs397516435	0	This gene encodes a tumor suppressor protein containing transcriptional activation, DNA binding, and	4200	http://www.ncbi.nlm.nih.gov/pubmed?term=TP53[TIAB]+AND+cancer[MH]																						Wee1 inhibitors	0				0.00694	0.05
67	TP53-67	chr17	7578190	-	A	G	central_nervous_system	TP53	MS	Y220C	0	0.05	Pathogenic/Likely pathogenic	COSM10758	upper_aerodigestive_tract(31); peritoneum(1); stomach(15); soft_tissue(9); central_nervous_system(24); small_intestine(3); haematopoietic_and_lymphoid_tissue(28); liver(11); biliary_tract(3); large_intestine(23); urinary_tract(15); salivary_gland(2); oesophagus(34); endometrium(4); skin(2); lung(25); ovary(46); pancreas(11); prostate(9); bone(2); breast(42)	1	rs121912666	0	This gene encodes a tumor suppressor protein containing transcriptional activation, DNA binding, and	4200	http://www.ncbi.nlm.nih.gov/pubmed?term=TP53[TIAB]+AND+cancer[MH]													../MuPIT_Interactive?gm=chr17:7674872									Wee1 inhibitors	0				0.0082	0.05
68	TP53-68	chr17	7577096	-	A	C	central_nervous_system	TP53	MS	D281A	0	0.05		COSM11665	upper_aerodigestive_tract(1); central_nervous_system(1)	1		0	This gene encodes a tumor suppressor protein containing transcriptional activation, DNA binding, and	4200	http://www.ncbi.nlm.nih.gov/pubmed?term=TP53[TIAB]+AND+cancer[MH]													../MuPIT_Interactive?gm=chr17:7673778	Yes								Wee1 inhibitors	0	intron	TP53	ENST00000413465.6(intron)	0.00223	0.05
69	TP53-69	chr17	7577097	-	G	C	central_nervous_system	TP53	MS	D281H	0	0.05		COSM10943	upper_aerodigestive_tract(2); adrenal_gland(1); large_intestine(1); soft_tissue(1); central_nervous_system(5); haematopoietic_and_lymphoid_tissue(1); breast(8); endometrium(1); urinary_tract(3); lung(3); liver(4); oesophagus(1); ovary(3); bone(1); pancreas(2)	1		0	This gene encodes a tumor suppressor protein containing transcriptional activation, DNA binding, and	4200	http://www.ncbi.nlm.nih.gov/pubmed?term=TP53[TIAB]+AND+cancer[MH]													../MuPIT_Interactive?gm=chr17:7673779	Yes								Wee1 inhibitors	0	intron	TP53	ENST00000413465.6(intron)	0.00152	0.05
70	TP53-70	chr17	7577114	-	G	A	central_nervous_system	TP53	MS	C275Y	0	0.05	Pathogenic/Likely pathogenic	COSM10893	upper_aerodigestive_tract(5); large_intestine(11); stomach(5); central_nervous_system(5); haematopoietic_and_lymphoid_tissue(6); liver(3); biliary_tract(1); urinary_tract(2); lung(5); breast(4); skin(3); oesophagus(3); ovary(6); NS(1); prostate(1); bone(1); pancreas(2)	1	rs863224451	0	This gene encodes a tumor suppressor protein containing transcriptional activation, DNA binding, and	4200	http://www.ncbi.nlm.nih.gov/pubmed?term=TP53[TIAB]+AND+cancer[MH]													../MuPIT_Interactive?gm=chr17:7673796	Yes								Wee1 inhibitors	0	intron	TP53	ENST00000413465.6(intron)	0.00121	0.05
71	TP53-71	chr17	7577121	-	C	T	central_nervous_system	TP53	MS	R273C	0	0.05		COSM10659	large_intestine(141); vulva(8); pleura(1); peritoneum(1); endometrium(20); lung(17); skin(12); kidney(2); thyroid(4); cervix(5); eye(1); central_nervous_system(177); genital_tract(1); oesophagus(28); upper_aerodigestive_tract(33); biliary_tract(7); stomach(36); soft_tissue(2); urinary_tract(13); breast(28); penis(1); prostate(15); pancreas(23); adrenal_gland(4); salivary_gland(1); small_intestine…	1	rs121913343	0	This gene encodes a tumor suppressor protein containing transcriptional activation, DNA binding, and	4200	http://www.ncbi.nlm.nih.gov/pubmed?term=TP53[TIAB]+AND+cancer[MH]													../MuPIT_Interactive?gm=chr17:7673803	Yes								Wee1 inhibitors	0	intron	TP53	ENST00000413465.6(intron)	0.00253	0.05
72	TP53-72	chr17	7578190	-	A	G	central_nervous_system	TP53	MS	Y220C	0	0.05	Pathogenic/Likely pathogenic	COSM10758	upper_aerodigestive_tract(31); peritoneum(1); stomach(15); soft_tissue(9); central_nervous_system(24); small_intestine(3); haematopoietic_and_lymphoid_tissue(28); liver(11); biliary_tract(3); large_intestine(23); urinary_tract(15); salivary_gland(2); oesophagus(34); endometrium(4); skin(2); lung(25); ovary(46); pancreas(11); prostate(9); bone(2); breast(42)	1	rs121912666	0	This gene encodes a tumor suppressor protein containing transcriptional activation, DNA binding, and	4200	http://www.ncbi.nlm.nih.gov/pubmed?term=TP53[TIAB]+AND+cancer[MH]													../MuPIT_Interactive?gm=chr17:7674872									Wee1 inhibitors	0				0.0082	0.05
73	TP53-73	chr17	7577139	-	C	T	central_nervous_system	TP53	MS	R267W	0	0.05		COSM11183	large_intestine(5); stomach(3); central_nervous_system(8); haematopoietic_and_lymphoid_tissue(2); thymus(1); endometrium(1); lung(1); liver(7); skin(1); oesophagus(1); ovary(1); prostate(1); bone(1)	1	rs55832599	0	This gene encodes a tumor suppressor protein containing transcriptional activation, DNA binding, and	4200	http://www.ncbi.nlm.nih.gov/pubmed?term=TP53[TIAB]+AND+cancer[MH]													../MuPIT_Interactive?gm=chr17:7673821									Wee1 inhibitors	0	intron	TP53	ENST00000413465.6(intron)	0.00081	0.05
74	TP53-74	chr17	7578208	-	A	G	central_nervous_system	TP53	MS	H214R	0	0.05		COSM43687	thyroid(1); large_intestine(5); stomach(8); soft_tissue(4); central_nervous_system(4); haematopoietic_and_lymphoid_tissue(3); biliary_tract(1); endometrium(1); urinary_tract(6); salivary_gland(1); lung(14); liver(9); oesophagus(7); ovary(6); pancreas(5); prostate(4); breast(2)	1		0	This gene encodes a tumor suppressor protein containing transcriptional activation, DNA binding, and	4200	http://www.ncbi.nlm.nih.gov/pubmed?term=TP53[TIAB]+AND+cancer[MH]													../MuPIT_Interactive?gm=chr17:7674890	Yes								Wee1 inhibitors	0				0.01174	0.05
75	TP53-75	chr17	7578460	-	T	G	central_nervous_system	TP53	MS	V157G	0	0.05		COSM43903	large_intestine(2); stomach(1); central_nervous_system(3); haematopoietic_and_lymphoid_tissue(3); lung(1); breast(2); oesophagus(1); ovary(1); liver(1)	1		0	This gene encodes a tumor suppressor protein containing transcriptional activation, DNA binding, and	4200	http://www.ncbi.nlm.nih.gov/pubmed?term=TP53[TIAB]+AND+cancer[MH]													../MuPIT_Interactive?gm=chr17:7675142	Yes								Wee1 inhibitors	0	3' UTR	TP53	ENST00000610623.4(3' UTR),ENST00000618944.4(3' UTR),ENST00000619186.4(3' UTR)	0.08673	0.15
76	TP53-76	chr17	7578406	-	G	A	central_nervous_system	TP53	MS	R175H	0	0.05	Pathogenic/Likely pathogenic, not provided	COSM10648	large_intestine(367); vulva(5); peritoneum(1); endometrium(14); lung(16); skin(6); kidney(7); thyroid(2); cervix(4); central_nervous_system(80); oesophagus(91); NS(2); upper_aerodigestive_tract(74); biliary_tract(14); stomach(75); soft_tissue(2); urinary_tract(28); liver(14); penis(1); prostate(8); pancreas(46); adrenal_gland(4); salivary_gland(10); small_intestine(1); haematopoietic_and_lymphoid…	1	rs28934578	0	This gene encodes a tumor suppressor protein containing transcriptional activation, DNA binding, and	4200	http://www.ncbi.nlm.nih.gov/pubmed?term=TP53[TIAB]+AND+cancer[MH]													../MuPIT_Interactive?gm=chr17:7675088	Yes								Wee1 inhibitors	0				0.00536	0.05
77	TP53-77	chr17	7577539	-	C	T	central_nervous_system	TP53	MS	R248W	0	0.05	Pathogenic/Likely pathogenic	COSM10656	large_intestine(159); vulva(4); pleura(1); endometrium(22); lung(20); skin(34); kidney(8); thyroid(4); cervix(1); central_nervous_system(40); oesophagus(52); NS(7); upper_aerodigestive_tract(32); biliary_tract(9); stomach(37); soft_tissue(5); urinary_tract(21); liver(5); penis(1); prostate(7); pancreas(20); haematopoietic_and_lymphoid_tissue(41); thymus(1); ovary(32); bone(2); breast(81)	1	rs121912651	0	This gene encodes a tumor suppressor protein containing transcriptional activation, DNA binding, and	4200	http://www.ncbi.nlm.nih.gov/pubmed?term=TP53[TIAB]+AND+cancer[MH]													../MuPIT_Interactive?gm=chr17:7674221	Yes								Wee1 inhibitors	0				0.00071	0.05
78	TP53-78	chr17	7577121	-	C	T	central_nervous_system	TP53	MS	R273C	0	0.05		COSM10659	large_intestine(141); vulva(8); pleura(1); peritoneum(1); endometrium(20); lung(17); skin(12); kidney(2); thyroid(4); cervix(5); eye(1); central_nervous_system(177); genital_tract(1); oesophagus(28); upper_aerodigestive_tract(33); biliary_tract(7); stomach(36); soft_tissue(2); urinary_tract(13); breast(28); penis(1); prostate(15); pancreas(23); adrenal_gland(4); salivary_gland(1); small_intestine…	1	rs121913343	0	This gene encodes a tumor suppressor protein containing transcriptional activation, DNA binding, and	4200	http://www.ncbi.nlm.nih.gov/pubmed?term=TP53[TIAB]+AND+cancer[MH]													../MuPIT_Interactive?gm=chr17:7673803	Yes								Wee1 inhibitors	0	intron	TP53	ENST00000413465.6(intron)	0.00253	0.05
79	TP53-79	chr17	7577559	-	C	A	central_nervous_system	TP53	MS	S241Y	0	0.05		COSM10935	upper_aerodigestive_tract(2); biliary_tract(3); vulva(1); stomach(1); central_nervous_system(2); haematopoietic_and_lymphoid_tissue(2); large_intestine(2); urinary_tract(5); oesophagus(1); breast(2); ovary(1); kidney(1)	1		0	This gene encodes a tumor suppressor protein containing transcriptional activation, DNA binding, and	4200	http://www.ncbi.nlm.nih.gov/pubmed?term=TP53[TIAB]+AND+cancer[MH]													../MuPIT_Interactive?gm=chr17:7674241	Yes								Wee1 inhibitors	0				0.00324	0.05
80	TP53-80	chr17	7578406	-	G	A	central_nervous_system	TP53	MS	R175H	0	0.05	Pathogenic/Likely pathogenic, not provided	COSM10648	large_intestine(367); vulva(5); peritoneum(1); endometrium(14); lung(16); skin(6); kidney(7); thyroid(2); cervix(4); central_nervous_system(80); oesophagus(91); NS(2); upper_aerodigestive_tract(74); biliary_tract(14); stomach(75); soft_tissue(2); urinary_tract(28); liver(14); penis(1); prostate(8); pancreas(46); adrenal_gland(4); salivary_gland(10); small_intestine(1); haematopoietic_and_lymphoid…	1	rs28934578	0	This gene encodes a tumor suppressor protein containing transcriptional activation, DNA binding, and	4200	http://www.ncbi.nlm.nih.gov/pubmed?term=TP53[TIAB]+AND+cancer[MH]													../MuPIT_Interactive?gm=chr17:7675088	Yes								Wee1 inhibitors	0				0.00536	0.05
81	TP53-81	chr17	7578394	-	A	G	central_nervous_system	TP53	MS	H179R	0	0.05		COSM10889	upper_aerodigestive_tract(14); cervix(1); large_intestine(14); stomach(3); soft_tissue(3); central_nervous_system(24); haematopoietic_and_lymphoid_tissue(12); liver(1); biliary_tract(4); endometrium(2); urinary_tract(4); salivary_gland(1); oesophagus(24); breast(31); lung(13); ovary(18); prostate(5); pancreas(6)	1		0	This gene encodes a tumor suppressor protein containing transcriptional activation, DNA binding, and	4200	http://www.ncbi.nlm.nih.gov/pubmed?term=TP53[TIAB]+AND+cancer[MH]													../MuPIT_Interactive?gm=chr17:7675076	Yes								Wee1 inhibitors	0				0.01255	0.05
82	TP53-82	chr17	7577121	-	C	T	central_nervous_system	TP53	MS	R273C	0	0.05		COSM10659	large_intestine(141); vulva(8); pleura(1); peritoneum(1); endometrium(20); lung(17); skin(12); kidney(2); thyroid(4); cervix(5); eye(1); central_nervous_system(177); genital_tract(1); oesophagus(28); upper_aerodigestive_tract(33); biliary_tract(7); stomach(36); soft_tissue(2); urinary_tract(13); breast(28); penis(1); prostate(15); pancreas(23); adrenal_gland(4); salivary_gland(1); small_intestine…	1	rs121913343	0	This gene encodes a tumor suppressor protein containing transcriptional activation, DNA binding, and	4200	http://www.ncbi.nlm.nih.gov/pubmed?term=TP53[TIAB]+AND+cancer[MH]													../MuPIT_Interactive?gm=chr17:7673803	Yes								Wee1 inhibitors	0	intron	TP53	ENST00000413465.6(intron)	0.00253	0.05
83	TP53-83	chr17	7577121	-	C	T	central_nervous_system	TP53	MS	R273C	0	0.05		COSM10659	large_intestine(141); vulva(8); pleura(1); peritoneum(1); endometrium(20); lung(17); skin(12); kidney(2); thyroid(4); cervix(5); eye(1); central_nervous_system(177); genital_tract(1); oesophagus(28); upper_aerodigestive_tract(33); biliary_tract(7); stomach(36); soft_tissue(2); urinary_tract(13); breast(28); penis(1); prostate(15); pancreas(23); adrenal_gland(4); salivary_gland(1); small_intestine…	1	rs121913343	0	This gene encodes a tumor suppressor protein containing transcriptional activation, DNA binding, and	4200	http://www.ncbi.nlm.nih.gov/pubmed?term=TP53[TIAB]+AND+cancer[MH]													../MuPIT_Interactive?gm=chr17:7673803	Yes								Wee1 inhibitors	0	intron	TP53	ENST00000413465.6(intron)	0.00253	0.05
84	TP53-84	chr17	7578406	-	G	A	central_nervous_system	TP53	MS	R175H	0	0.05	Pathogenic/Likely pathogenic, not provided	COSM10648	large_intestine(367); vulva(5); peritoneum(1); endometrium(14); lung(16); skin(6); kidney(7); thyroid(2); cervix(4); central_nervous_system(80); oesophagus(91); NS(2); upper_aerodigestive_tract(74); biliary_tract(14); stomach(75); soft_tissue(2); urinary_tract(28); liver(14); penis(1); prostate(8); pancreas(46); adrenal_gland(4); salivary_gland(10); small_intestine(1); haematopoietic_and_lymphoid…	1	rs28934578	0	This gene encodes a tumor suppressor protein containing transcriptional activation, DNA binding, and	4200	http://www.ncbi.nlm.nih.gov/pubmed?term=TP53[TIAB]+AND+cancer[MH]													../MuPIT_Interactive?gm=chr17:7675088	Yes								Wee1 inhibitors	0				0.00536	0.05
85	ATRX-1	chrX	76909629	-	C	T	central_nervous_system	ATRX	SG	R1426*				COSM144223	central_nervous_system(9); endometrium(1)	1		0	The protein encoded by this gene contains an ATPase/helicase domain, and thus it belongs to the SWI/SNF family of chromatin remodeling proteins. The mutations of this gene are associated with an X-linked mental retardation (XLMR) syndrome most often accompanied by alpha-thalassemia (ATRX) syndrome. These mutations have been shown to cause diverse changes in the pattern of DNA methylation, which m…	48	http://www.ncbi.nlm.nih.gov/pubmed?term=ATRX[TIAB]+AND+cancer[MH]																							0				0.1205	0.2
86	ATRX-2	chrX	76939883	-	C	T	central_nervous_system	ATRX	SG	Q289*						1		0	The protein encoded by this gene contains an ATPase/helicase domain, and thus it belongs to the SWI/SNF family of chromatin remodeling proteins. The mutations of this gene are associated with an X-linked mental retardation (XLMR) syndrome most often accompanied by alpha-thalassemia (ATRX) syndrome. These mutations have been shown to cause diverse changes in the pattern of DNA methylation, which m…	48	http://www.ncbi.nlm.nih.gov/pubmed?term=ATRX[TIAB]+AND+cancer[MH]																							0				0.03229	0.1
87	ATRX-3	chrX	76938326	-	C	T	central_nervous_system	ATRX	SG	R808*				COSM1716663	central_nervous_system(3)	1		0	The protein encoded by this gene contains an ATPase/helicase domain, and thus it belongs to the SWI/SNF family of chromatin remodeling proteins. The mutations of this gene are associated with an X-linked mental retardation (XLMR) syndrome most often accompanied by alpha-thalassemia (ATRX) syndrome. These mutations have been shown to cause diverse changes in the pattern of DNA methylation, which m…	48	http://www.ncbi.nlm.nih.gov/pubmed?term=ATRX[TIAB]+AND+cancer[MH]																							0				0.02167	0.05
88	ATRX-4	chrX	76829815	-	A	T	central_nervous_system	ATRX	SG	K2076*				COSM5766182	central_nervous_system(1)	1		0	The protein encoded by this gene contains an ATPase/helicase domain, and thus it belongs to the SWI/SNF family of chromatin remodeling proteins. The mutations of this gene are associated with an X-linked mental retardation (XLMR) syndrome most often accompanied by alpha-thalassemia (ATRX) syndrome. These mutations have been shown to cause diverse changes in the pattern of DNA methylation, which m…	48	http://www.ncbi.nlm.nih.gov/pubmed?term=ATRX[TIAB]+AND+cancer[MH]																							0				0.08713	0.15
89	ATRX-5	chrX	76875895	-	C	A	central_nervous_system	ATRX	MS	T1747K	0.0022	0.05		COSM1716712	central_nervous_system(2)	1		0	The protein encoded by this gene contains an ATPase/helicase domain, and thus it belongs to the SWI/SNF family of chromatin remodeling proteins. The mutations of this gene are associated with an X-linked mental retardation (XLMR) syndrome most often accompanied by alpha-thalassemia (ATRX) syndrome. These mutations have been shown to cause diverse changes in the pattern of DNA methylation, which m…	48	http://www.ncbi.nlm.nih.gov/pubmed?term=ATRX[TIAB]+AND+cancer[MH]													../MuPIT_Interactive?gm=chrX:77620427										0				0.02095	0.05
90	ATRX-6	chrX	76813056	-	G	C	central_nervous_system	ATRX	MS	V2189L	0.0054	0.05		COSM1716729	central_nervous_system(2)	1		0	The protein encoded by this gene contains an ATPase/helicase domain, and thus it belongs to the SWI/SNF family of chromatin remodeling proteins. The mutations of this gene are associated with an X-linked mental retardation (XLMR) syndrome most often accompanied by alpha-thalassemia (ATRX) syndrome. These mutations have been shown to cause diverse changes in the pattern of DNA methylation, which m…	48	http://www.ncbi.nlm.nih.gov/pubmed?term=ATRX[TIAB]+AND+cancer[MH]																							0				0.0927	0.2
91	ATRX-7	chrX	76937939	-	A	T	central_nervous_system	ATRX	SG	R937*				COSM1716668	central_nervous_system(2)	1		0	The protein encoded by this gene contains an ATPase/helicase domain, and thus it belongs to the SWI/SNF family of chromatin remodeling proteins. The mutations of this gene are associated with an X-linked mental retardation (XLMR) syndrome most often accompanied by alpha-thalassemia (ATRX) syndrome. These mutations have been shown to cause diverse changes in the pattern of DNA methylation, which m…	48	http://www.ncbi.nlm.nih.gov/pubmed?term=ATRX[TIAB]+AND+cancer[MH]																							0				0.17143	0.25
92	ATRX-8	chrX	76938407	-	C	T	central_nervous_system	ATRX	SG	R781*				COSM1716657	central_nervous_system(5)	1		0	The protein encoded by this gene contains an ATPase/helicase domain, and thus it belongs to the SWI/SNF family of chromatin remodeling proteins. The mutations of this gene are associated with an X-linked mental retardation (XLMR) syndrome most often accompanied by alpha-thalassemia (ATRX) syndrome. These mutations have been shown to cause diverse changes in the pattern of DNA methylation, which m…	48	http://www.ncbi.nlm.nih.gov/pubmed?term=ATRX[TIAB]+AND+cancer[MH]																			Simple_repeat	Simple_repeat	(CTTTTTC)n		0				0.05765	0.15
93	ATRX-9	chrX	76874312	-	G	C	central_nervous_system	ATRX	MS	A1804P	0.046	0.1		COSM1716717	central_nervous_system(2)	1		0	The protein encoded by this gene contains an ATPase/helicase domain, and thus it belongs to the SWI/SNF family of chromatin remodeling proteins. The mutations of this gene are associated with an X-linked mental retardation (XLMR) syndrome most often accompanied by alpha-thalassemia (ATRX) syndrome. These mutations have been shown to cause diverse changes in the pattern of DNA methylation, which m…	48	http://www.ncbi.nlm.nih.gov/pubmed?term=ATRX[TIAB]+AND+cancer[MH]													../MuPIT_Interactive?gm=chrX:77618844										0				0.05445	0.15
94	ATRX-10	chrX	76937403	-	T	G	central_nervous_system	ATRX	SG	Y1115*				COSM1716682	central_nervous_system(3)	1		0	The protein encoded by this gene contains an ATPase/helicase domain, and thus it belongs to the SWI/SNF family of chromatin remodeling proteins. The mutations of this gene are associated with an X-linked mental retardation (XLMR) syndrome most often accompanied by alpha-thalassemia (ATRX) syndrome. These mutations have been shown to cause diverse changes in the pattern of DNA methylation, which m…	48	http://www.ncbi.nlm.nih.gov/pubmed?term=ATRX[TIAB]+AND+cancer[MH]																							0				0.09666	0.2
95	ATRX-11	chrX	76814313	-	C	T	central_nervous_system	ATRX	SG	R2111*				COSM144221	central_nervous_system(4)	1		0	The protein encoded by this gene contains an ATPase/helicase domain, and thus it belongs to the SWI/SNF family of chromatin remodeling proteins. The mutations of this gene are associated with an X-linked mental retardation (XLMR) syndrome most often accompanied by alpha-thalassemia (ATRX) syndrome. These mutations have been shown to cause diverse changes in the pattern of DNA methylation, which m…	48	http://www.ncbi.nlm.nih.gov/pubmed?term=ATRX[TIAB]+AND+cancer[MH]																							0				0.01929	0.05
96	ATRX-12	chrX	76814207	-	A	G	central_nervous_system	ATRX	MS	Q2146R	0.0022	0.05				1		0	The protein encoded by this gene contains an ATPase/helicase domain, and thus it belongs to the SWI/SNF family of chromatin remodeling proteins. The mutations of this gene are associated with an X-linked mental retardation (XLMR) syndrome most often accompanied by alpha-thalassemia (ATRX) syndrome. These mutations have been shown to cause diverse changes in the pattern of DNA methylation, which m…	48	http://www.ncbi.nlm.nih.gov/pubmed?term=ATRX[TIAB]+AND+cancer[MH]																							0				0.00648	0.05
97	ATRX-13	chrX	76814207	-	A	G	central_nervous_system	ATRX	MS	Q2146R	0.0022	0.05				1		0	The protein encoded by this gene contains an ATPase/helicase domain, and thus it belongs to the SWI/SNF family of chromatin remodeling proteins. The mutations of this gene are associated with an X-linked mental retardation (XLMR) syndrome most often accompanied by alpha-thalassemia (ATRX) syndrome. These mutations have been shown to cause diverse changes in the pattern of DNA methylation, which m…	48	http://www.ncbi.nlm.nih.gov/pubmed?term=ATRX[TIAB]+AND+cancer[MH]																							0				0.00648	0.05
98	ATRX-14	chrX	76912090	-	G	T	central_nervous_system	ATRX	SG	E1392*						1		0	The protein encoded by this gene contains an ATPase/helicase domain, and thus it belongs to the SWI/SNF family of chromatin remodeling proteins. The mutations of this gene are associated with an X-linked mental retardation (XLMR) syndrome most often accompanied by alpha-thalassemia (ATRX) syndrome. These mutations have been shown to cause diverse changes in the pattern of DNA methylation, which m…	48	http://www.ncbi.nlm.nih.gov/pubmed?term=ATRX[TIAB]+AND+cancer[MH]																							0				0.06545	0.15
99	ATRX-15	chrX	76875973	-	G	A	central_nervous_system	ATRX	MS	G1721D	0.0088	0.05				1		0	The protein encoded by this gene contains an ATPase/helicase domain, and thus it belongs to the SWI/SNF family of chromatin remodeling proteins. The mutations of this gene are associated with an X-linked mental retardation (XLMR) syndrome most often accompanied by alpha-thalassemia (ATRX) syndrome. These mutations have been shown to cause diverse changes in the pattern of DNA methylation, which m…	48	http://www.ncbi.nlm.nih.gov/pubmed?term=ATRX[TIAB]+AND+cancer[MH]													../MuPIT_Interactive?gm=chrX:77620505										0				0.01447	0.05
100	ATRX-16	chrX	76940493	-	C	A	central_nervous_system	ATRX	SG	C200*						1		0	The protein encoded by this gene contains an ATPase/helicase domain, and thus it belongs to the SWI/SNF family of chromatin remodeling proteins. The mutations of this gene are associated with an X-linked mental retardation (XLMR) syndrome most often accompanied by alpha-thalassemia (ATRX) syndrome. These mutations have been shown to cause diverse changes in the pattern of DNA methylation, which m…	48	http://www.ncbi.nlm.nih.gov/pubmed?term=ATRX[TIAB]+AND+cancer[MH]																							0				0.03771	0.1
101	ATRX-17	chrX	76875895	-	C	T	central_nervous_system	ATRX	MS	T1747I	0.0258	0.05				1		0	The protein encoded by this gene contains an ATPase/helicase domain, and thus it belongs to the SWI/SNF family of chromatin remodeling proteins. The mutations of this gene are associated with an X-linked mental retardation (XLMR) syndrome most often accompanied by alpha-thalassemia (ATRX) syndrome. These mutations have been shown to cause diverse changes in the pattern of DNA methylation, which m…	48	http://www.ncbi.nlm.nih.gov/pubmed?term=ATRX[TIAB]+AND+cancer[MH]													../MuPIT_Interactive?gm=chrX:77620427										0				0.00739	0.05
102	ATRX-18	chrX	76778871	-	A	G	central_nervous_system	ATRX	MS	I2236M	0.0144	0.05				1		0	The protein encoded by this gene contains an ATPase/helicase domain, and thus it belongs to the SWI/SNF family of chromatin remodeling proteins. The mutations of this gene are associated with an X-linked mental retardation (XLMR) syndrome most often accompanied by alpha-thalassemia (ATRX) syndrome. These mutations have been shown to cause diverse changes in the pattern of DNA methylation, which m…	48	http://www.ncbi.nlm.nih.gov/pubmed?term=ATRX[TIAB]+AND+cancer[MH]																							0				0.10647	0.2
103	ATRX-19	chrX	76952103	-	A	G	central_nervous_system	ATRX	MS	N111S	0.0612	0.1		COSM1736745	central_nervous_system(1)	1		0	The protein encoded by this gene contains an ATPase/helicase domain, and thus it belongs to the SWI/SNF family of chromatin remodeling proteins. The mutations of this gene are associated with an X-linked mental retardation (XLMR) syndrome most often accompanied by alpha-thalassemia (ATRX) syndrome. These mutations have been shown to cause diverse changes in the pattern of DNA methylation, which m…	48	http://www.ncbi.nlm.nih.gov/pubmed?term=ATRX[TIAB]+AND+cancer[MH]													../MuPIT_Interactive?gm=chrX:77696615										0				0.37901	0.5
104	ATRX-20	chrX	76944344	-	T	G	central_nervous_system	ATRX	SG	Y187*				COSM1716608	central_nervous_system(2)	1		0	The protein encoded by this gene contains an ATPase/helicase domain, and thus it belongs to the SWI/SNF family of chromatin remodeling proteins. The mutations of this gene are associated with an X-linked mental retardation (XLMR) syndrome most often accompanied by alpha-thalassemia (ATRX) syndrome. These mutations have been shown to cause diverse changes in the pattern of DNA methylation, which m…	48	http://www.ncbi.nlm.nih.gov/pubmed?term=ATRX[TIAB]+AND+cancer[MH]																							0				0.02752	0.1
105	ATRX-21	chrX	76944376	-	C	T	central_nervous_system	ATRX	SG	Q177*				COSM2151015	central_nervous_system(2)	1		0	The protein encoded by this gene contains an ATPase/helicase domain, and thus it belongs to the SWI/SNF family of chromatin remodeling proteins. The mutations of this gene are associated with an X-linked mental retardation (XLMR) syndrome most often accompanied by alpha-thalassemia (ATRX) syndrome. These mutations have been shown to cause diverse changes in the pattern of DNA methylation, which m…	48	http://www.ncbi.nlm.nih.gov/pubmed?term=ATRX[TIAB]+AND+cancer[MH]																							0				0.03836	0.1
106	ATRX-22	chrX	76944376	-	C	T	central_nervous_system	ATRX	SG	Q177*				COSM2151015	central_nervous_system(2)	1		0	The protein encoded by this gene contains an ATPase/helicase domain, and thus it belongs to the SWI/SNF family of chromatin remodeling proteins. The mutations of this gene are associated with an X-linked mental retardation (XLMR) syndrome most often accompanied by alpha-thalassemia (ATRX) syndrome. These mutations have been shown to cause diverse changes in the pattern of DNA methylation, which m…	48	http://www.ncbi.nlm.nih.gov/pubmed?term=ATRX[TIAB]+AND+cancer[MH]																							0				0.03836	0.1
107	ATRX-23	chrX	76944376	-	C	T	central_nervous_system	ATRX	SG	Q177*				COSM2151015	central_nervous_system(2)	1		0	The protein encoded by this gene contains an ATPase/helicase domain, and thus it belongs to the SWI/SNF family of chromatin remodeling proteins. The mutations of this gene are associated with an X-linked mental retardation (XLMR) syndrome most often accompanied by alpha-thalassemia (ATRX) syndrome. These mutations have been shown to cause diverse changes in the pattern of DNA methylation, which m…	48	http://www.ncbi.nlm.nih.gov/pubmed?term=ATRX[TIAB]+AND+cancer[MH]																							0				0.03836	0.1
108	ATRX-24	chrX	76778818	-	A	G	central_nervous_system	ATRX	MS	H2254R	0.0004	0.05		COSM144220	central_nervous_system(3)	1		0	The protein encoded by this gene contains an ATPase/helicase domain, and thus it belongs to the SWI/SNF family of chromatin remodeling proteins. The mutations of this gene are associated with an X-linked mental retardation (XLMR) syndrome most often accompanied by alpha-thalassemia (ATRX) syndrome. These mutations have been shown to cause diverse changes in the pattern of DNA methylation, which m…	48	http://www.ncbi.nlm.nih.gov/pubmed?term=ATRX[TIAB]+AND+cancer[MH]																							0				0.1342	0.25
109	ATRX-25	chrX	76778818	-	A	G	central_nervous_system	ATRX	MS	H2254R	0.0004	0.05		COSM144220	central_nervous_system(3)	1		0	The protein encoded by this gene contains an ATPase/helicase domain, and thus it belongs to the SWI/SNF family of chromatin remodeling proteins. The mutations of this gene are associated with an X-linked mental retardation (XLMR) syndrome most often accompanied by alpha-thalassemia (ATRX) syndrome. These mutations have been shown to cause diverse changes in the pattern of DNA methylation, which m…	48	http://www.ncbi.nlm.nih.gov/pubmed?term=ATRX[TIAB]+AND+cancer[MH]																							0				0.1342	0.25
110	ATRX-26	chrX	76918907	-	G	T	central_nervous_system	ATRX	SG	E1362*						1		0	The protein encoded by this gene contains an ATPase/helicase domain, and thus it belongs to the SWI/SNF family of chromatin remodeling proteins. The mutations of this gene are associated with an X-linked mental retardation (XLMR) syndrome most often accompanied by alpha-thalassemia (ATRX) syndrome. These mutations have been shown to cause diverse changes in the pattern of DNA methylation, which m…	48	http://www.ncbi.nlm.nih.gov/pubmed?term=ATRX[TIAB]+AND+cancer[MH]																							0				0.02948	0.1
111	ATRX-27	chrX	76872118	-	G	C	central_nervous_system	ATRX	MS	Q1843H	0.0046	0.05		COSM2155629	central_nervous_system(2)	1		0	The protein encoded by this gene contains an ATPase/helicase domain, and thus it belongs to the SWI/SNF family of chromatin remodeling proteins. The mutations of this gene are associated with an X-linked mental retardation (XLMR) syndrome most often accompanied by alpha-thalassemia (ATRX) syndrome. These mutations have been shown to cause diverse changes in the pattern of DNA methylation, which m…	48	http://www.ncbi.nlm.nih.gov/pubmed?term=ATRX[TIAB]+AND+cancer[MH]													../MuPIT_Interactive?gm=chrX:77616650										0				0.02176	0.05
112	ATRX-28	chrX	76872118	-	G	C	central_nervous_system	ATRX	MS	Q1843H	0.0046	0.05		COSM2155629	central_nervous_system(2)	1		0	The protein encoded by this gene contains an ATPase/helicase domain, and thus it belongs to the SWI/SNF family of chromatin remodeling proteins. The mutations of this gene are associated with an X-linked mental retardation (XLMR) syndrome most often accompanied by alpha-thalassemia (ATRX) syndrome. These mutations have been shown to cause diverse changes in the pattern of DNA methylation, which m…	48	http://www.ncbi.nlm.nih.gov/pubmed?term=ATRX[TIAB]+AND+cancer[MH]													../MuPIT_Interactive?gm=chrX:77616650										0				0.02176	0.05
113	ATRX-29	chrX	76938326	-	C	T	central_nervous_system	ATRX	SG	R808*				COSM1716663	central_nervous_system(3)	1		0	The protein encoded by this gene contains an ATPase/helicase domain, and thus it belongs to the SWI/SNF family of chromatin remodeling proteins. The mutations of this gene are associated with an X-linked mental retardation (XLMR) syndrome most often accompanied by alpha-thalassemia (ATRX) syndrome. These mutations have been shown to cause diverse changes in the pattern of DNA methylation, which m…	48	http://www.ncbi.nlm.nih.gov/pubmed?term=ATRX[TIAB]+AND+cancer[MH]																							0				0.02167	0.05
114	ATRX-30	chrX	76875916	-	C	G	central_nervous_system	ATRX	SG	S1740*				COSM3406599	central_nervous_system(1)	1		0	The protein encoded by this gene contains an ATPase/helicase domain, and thus it belongs to the SWI/SNF family of chromatin remodeling proteins. The mutations of this gene are associated with an X-linked mental retardation (XLMR) syndrome most often accompanied by alpha-thalassemia (ATRX) syndrome. These mutations have been shown to cause diverse changes in the pattern of DNA methylation, which m…	48	http://www.ncbi.nlm.nih.gov/pubmed?term=ATRX[TIAB]+AND+cancer[MH]																							0				0.01452	0.05
115	ATRX-31	chrX	76938029	-	C	T	central_nervous_system	ATRX	SG	R907*				COSM13837	lung(3); central_nervous_system(2)	1		0	The protein encoded by this gene contains an ATPase/helicase domain, and thus it belongs to the SWI/SNF family of chromatin remodeling proteins. The mutations of this gene are associated with an X-linked mental retardation (XLMR) syndrome most often accompanied by alpha-thalassemia (ATRX) syndrome. These mutations have been shown to cause diverse changes in the pattern of DNA methylation, which m…	48	http://www.ncbi.nlm.nih.gov/pubmed?term=ATRX[TIAB]+AND+cancer[MH]																							0				0.08106	0.15
116	TTN-1	chr2	179641296	-	C	T	central_nervous_system	TTN	SY	G1765G						1	rs145999395	0	This gene encodes a large abundant protein of striated muscle. The product of this gene is divided into two	26	http://www.ncbi.nlm.nih.gov/pubmed?term=TTN[TIAB]+AND+cancer[MH]																							0
117	TTN-2	chr2	179455335	-	G	C	central_nervous_system	TTN	MS	G20373R	0.07	0.15				1		0	This gene encodes a large abundant protein of striated muscle. The product of this gene is divided into two	26	http://www.ncbi.nlm.nih.gov/pubmed?term=TTN[TIAB]+AND+cancer[MH]																							0				0.02844	0.1
118	TTN-3	chr2	179548729	-	A	G	central_nervous_system	TTN	MS	K10935E	0.2364	0.35				1	rs397517543	0	This gene encodes a large abundant protein of striated muscle. The product of this gene is divided into two	26	http://www.ncbi.nlm.nih.gov/pubmed?term=TTN[TIAB]+AND+cancer[MH]																							0	intron	TTN	ENST00000342175.10(intron),ENST00000359218.9(intron),ENST00000460472.6(intron)	0.23844	0.35
119	TTN-4	chr2	179441684	-	A	G	central_nervous_system	TTN	SY	V23126V						1		0	This gene encodes a large abundant protein of striated muscle. The product of this gene is divided into two	26	http://www.ncbi.nlm.nih.gov/pubmed?term=TTN[TIAB]+AND+cancer[MH]																							0
120	TTN-5	chr2	179447688	-	A	G	central_nervous_system	TTN	MS	T21948A	0.1804	0.3				1		0	This gene encodes a large abundant protein of striated muscle. The product of this gene is divided into two	26	http://www.ncbi.nlm.nih.gov/pubmed?term=TTN[TIAB]+AND+cancer[MH]																							0				0.20059	0.3
121	TTN-6	chr2	179595041	-	T	C	central_nervous_system	TTN	MS	V6029A	0.4042	0.55				1		0	This gene encodes a large abundant protein of striated muscle. The product of this gene is divided into two	26	http://www.ncbi.nlm.nih.gov/pubmed?term=TTN[TIAB]+AND+cancer[MH]																							0	intron	TTN	ENST00000342175.10(intron),ENST00000359218.9(intron),ENST00000460472.6(intron)	0.33539	0.45
122	TTN-7	chr2	179542438	-	G	A	central_nervous_system	TTN	MS	E11401K	0.1208	0.2				1	rs765827814	0	This gene encodes a large abundant protein of striated muscle. The product of this gene is divided into two	26	http://www.ncbi.nlm.nih.gov/pubmed?term=TTN[TIAB]+AND+cancer[MH]																							0	intron	TTN	ENST00000342175.10(intron),ENST00000359218.9(intron),ENST00000460472.6(intron)	0.24663	0.35
123	TTN-8	chr2	179451944	-	C	T	central_nervous_system	TTN	MS	P21332S	0.0306	0.1				1		0	This gene encodes a large abundant protein of striated muscle. The product of this gene is divided into two	26	http://www.ncbi.nlm.nih.gov/pubmed?term=TTN[TIAB]+AND+cancer[MH]																							0				0.12782	0.2
124	TTN-9	chr2	179596646	-	C	T	central_nervous_system	TTN	SY	Y5652Y						1	rs755186242	0	This gene encodes a large abundant protein of striated muscle. The product of this gene is divided into two	26	http://www.ncbi.nlm.nih.gov/pubmed?term=TTN[TIAB]+AND+cancer[MH]																							0	intron	TTN	ENST00000342175.10(intron),ENST00000359218.9(intron),ENST00000460472.6(intron)
125	TTN-10	chr2	179638971	-	C	T	central_nervous_system	TTN	SY	I2340I						1	rs587780986	0	This gene encodes a large abundant protein of striated muscle. The product of this gene is divided into two	26	http://www.ncbi.nlm.nih.gov/pubmed?term=TTN[TIAB]+AND+cancer[MH]																							0
126	TTN-11	chr2	179599696	-	G	A	central_nervous_system	TTN	SY	K4985K						1		0	This gene encodes a large abundant protein of striated muscle. The product of this gene is divided into two	26	http://www.ncbi.nlm.nih.gov/pubmed?term=TTN[TIAB]+AND+cancer[MH]																							0	intron	TTN	ENST00000342175.10(intron),ENST00000359218.9(intron),ENST00000460472.6(intron)
127	TTN-12	chr2	179391835	-	C	T	central_nervous_system	TTN	SY	D35960D						1	rs747964050	0	This gene encodes a large abundant protein of striated muscle. The product of this gene is divided into two	26	http://www.ncbi.nlm.nih.gov/pubmed?term=TTN[TIAB]+AND+cancer[MH]																							0
128	TTN-13	chr2	179590511	-	T	C	central_nervous_system	TTN	SY	C6846C						1		0	This gene encodes a large abundant protein of striated muscle. The product of this gene is divided into two	26	http://www.ncbi.nlm.nih.gov/pubmed?term=TTN[TIAB]+AND+cancer[MH]																							0	intron	TTN	ENST00000342175.10(intron),ENST00000359218.9(intron),ENST00000460472.6(intron)
129	TTN-14	chr2	179473562	-	A	G	central_nervous_system	TTN	SY	P17392P						1		0	This gene encodes a large abundant protein of striated muscle. The product of this gene is divided into two	26	http://www.ncbi.nlm.nih.gov/pubmed?term=TTN[TIAB]+AND+cancer[MH]																							0
130	TTN-15	chr2	179427450	-	C	T	central_nervous_system	TTN	SY	V27803V						1	rs767194702	0	This gene encodes a large abundant protein of striated muscle. The product of this gene is divided into two	26	http://www.ncbi.nlm.nih.gov/pubmed?term=TTN[TIAB]+AND+cancer[MH]																							0
131	TTN-16	chr2	179458825	-	G	A	central_nervous_system	TTN	MS	R19432H	0.351	0.5				1	rs745631866	0	This gene encodes a large abundant protein of striated muscle. The product of this gene is divided into two	26	http://www.ncbi.nlm.nih.gov/pubmed?term=TTN[TIAB]+AND+cancer[MH]																							0				0.15505	0.25
132	TTN-17	chr2	179458435	-	C	T	central_nervous_system	TTN	MS	T19531I	0.0186	0.05				1		0	This gene encodes a large abundant protein of striated muscle. The product of this gene is divided into two	26	http://www.ncbi.nlm.nih.gov/pubmed?term=TTN[TIAB]+AND+cancer[MH]																							0				0.11841	0.2
133	TTN-18	chr2	179416435	-	C	T	central_nervous_system	TTN	MS	R30398C	0.4194	0.6				1	rs765097933	0	This gene encodes a large abundant protein of striated muscle. The product of this gene is divided into two	26	http://www.ncbi.nlm.nih.gov/pubmed?term=TTN[TIAB]+AND+cancer[MH]																							0				0.18328	0.3
134	TTN-19	chr2	179482209	-	C	T	central_nervous_system	TTN	MS	S15868F	0.0028	0.05				1		0	This gene encodes a large abundant protein of striated muscle. The product of this gene is divided into two	26	http://www.ncbi.nlm.nih.gov/pubmed?term=TTN[TIAB]+AND+cancer[MH]													../MuPIT_Interactive?gm=chr2:178617482										0				0.33225	0.45
135	TTN-20	chr2	179422145	-	A	G	central_nervous_system	TTN	MS	I29282V	0.1318	0.25				1		0	This gene encodes a large abundant protein of striated muscle. The product of this gene is divided into two	26	http://www.ncbi.nlm.nih.gov/pubmed?term=TTN[TIAB]+AND+cancer[MH]																							0				0.21941	0.35
136	TTN-21	chr2	179425576	-	A	G	central_nervous_system	TTN	MS	Y28428C	0.006	0.05				1		0	This gene encodes a large abundant protein of striated muscle. The product of this gene is divided into two	26	http://www.ncbi.nlm.nih.gov/pubmed?term=TTN[TIAB]+AND+cancer[MH]																							0				0.01559	0.05
137	TTN-22	chr2	179667003	-	G	A	central_nervous_system	TTN	MS	G53S	0.3302	0.5				1	rs150902810	5.81395e-05	This gene encodes a large abundant protein of striated muscle. The product of this gene is divided into two	26	http://www.ncbi.nlm.nih.gov/pubmed?term=TTN[TIAB]+AND+cancer[MH]													../MuPIT_Interactive?gm=chr2:178802276										0.000199681				0.04645	0.1
138	TTN-23	chr2	179642500	-	G	G	central_nervous_system	TTN	SY	G1471G						1		0	This gene encodes a large abundant protein of striated muscle. The product of this gene is divided into two	26	http://www.ncbi.nlm.nih.gov/pubmed?term=TTN[TIAB]+AND+cancer[MH]																							0
139	TTN-24	chr2	179484977	-	A	G	central_nervous_system	TTN	MS	Y15424C	0.0048	0.05				1		0	This gene encodes a large abundant protein of striated muscle. The product of this gene is divided into two	26	http://www.ncbi.nlm.nih.gov/pubmed?term=TTN[TIAB]+AND+cancer[MH]													../MuPIT_Interactive?gm=chr2:178620250										0				0.01326	0.05
140	TTN-25	chr2	179479364	-	A	G	central_nervous_system	TTN	MS	T16293A	0.167	0.3				1		0	This gene encodes a large abundant protein of striated muscle. The product of this gene is divided into two	26	http://www.ncbi.nlm.nih.gov/pubmed?term=TTN[TIAB]+AND+cancer[MH]													../MuPIT_Interactive?gm=chr2:178614637										0				0.09199	0.2
141	TTN-26	chr2	179596645	-	G	A	central_nervous_system	TTN	MS	D5653N	0.1122	0.2				1	rs267599067	0	This gene encodes a large abundant protein of striated muscle. The product of this gene is divided into two	26	http://www.ncbi.nlm.nih.gov/pubmed?term=TTN[TIAB]+AND+cancer[MH]																							0	intron	TTN	ENST00000342175.10(intron),ENST00000359218.9(intron),ENST00000460472.6(intron)	0.33752	0.45
142	TTN-27	chr2	179406171	-	C	T	central_nervous_system	TTN	SG	R32545*						1		0	This gene encodes a large abundant protein of striated muscle. The product of this gene is divided into two	26	http://www.ncbi.nlm.nih.gov/pubmed?term=TTN[TIAB]+AND+cancer[MH]																							0				0.01062	0.05
143	TTN-28	chr2	179469738	-	C	T	central_nervous_system	TTN	SG	R18056*						1	rs768431507	0	This gene encodes a large abundant protein of striated muscle. The product of this gene is divided into two	26	http://www.ncbi.nlm.nih.gov/pubmed?term=TTN[TIAB]+AND+cancer[MH]																							0				0.03013	0.1
144	TTN-29	chr2	179596646	-	C	T	central_nervous_system	TTN	SY	Y5652Y						1	rs755186242	0	This gene encodes a large abundant protein of striated muscle. The product of this gene is divided into two	26	http://www.ncbi.nlm.nih.gov/pubmed?term=TTN[TIAB]+AND+cancer[MH]																							0	intron	TTN	ENST00000342175.10(intron),ENST00000359218.9(intron),ENST00000460472.6(intron)
145	TTN-30	chr2	179638971	-	C	T	central_nervous_system	TTN	SY	I2340I						1	rs587780986	0	This gene encodes a large abundant protein of striated muscle. The product of this gene is divided into two	26	http://www.ncbi.nlm.nih.gov/pubmed?term=TTN[TIAB]+AND+cancer[MH]																							0
146	TTN-31	chr2	179436861	-	T	C	central_nervous_system	TTN	SY	C24666C						1		0	This gene encodes a large abundant protein of striated muscle. The product of this gene is divided into two	26	http://www.ncbi.nlm.nih.gov/pubmed?term=TTN[TIAB]+AND+cancer[MH]																							0
147	TTN-32	chr2	179599696	-	G	A	central_nervous_system	TTN	SY	K4985K						1		0	This gene encodes a large abundant protein of striated muscle. The product of this gene is divided into two	26	http://www.ncbi.nlm.nih.gov/pubmed?term=TTN[TIAB]+AND+cancer[MH]																							0	intron	TTN	ENST00000342175.10(intron),ENST00000359218.9(intron),ENST00000460472.6(intron)
148	TTN-33	chr2	179462729	-	A	G	central_nervous_system	TTN	SY	G19056G						1		0	This gene encodes a large abundant protein of striated muscle. The product of this gene is divided into two	26	http://www.ncbi.nlm.nih.gov/pubmed?term=TTN[TIAB]+AND+cancer[MH]																							0
149	TTN-34	chr2	179391835	-	C	T	central_nervous_system	TTN	SY	D35960D						1	rs747964050	0	This gene encodes a large abundant protein of striated muscle. The product of this gene is divided into two	26	http://www.ncbi.nlm.nih.gov/pubmed?term=TTN[TIAB]+AND+cancer[MH]																							0
150	TTN-35	chr2	179590511	-	T	C	central_nervous_system	TTN	SY	C6846C						1		0	This gene encodes a large abundant protein of striated muscle. The product of this gene is divided into two	26	http://www.ncbi.nlm.nih.gov/pubmed?term=TTN[TIAB]+AND+cancer[MH]																							0	intron	TTN	ENST00000342175.10(intron),ENST00000359218.9(intron),ENST00000460472.6(intron)
151	TTN-36	chr2	179472411	-	G	A	central_nervous_system	TTN	SY	E17668E						1		0	This gene encodes a large abundant protein of striated muscle. The product of this gene is divided into two	26	http://www.ncbi.nlm.nih.gov/pubmed?term=TTN[TIAB]+AND+cancer[MH]																							0
152	TTN-37	chr2	179473562	-	A	G	central_nervous_system	TTN	SY	P17392P						1		0	This gene encodes a large abundant protein of striated muscle. The product of this gene is divided into two	26	http://www.ncbi.nlm.nih.gov/pubmed?term=TTN[TIAB]+AND+cancer[MH]																							0
153	TTN-38	chr2	179427450	-	C	T	central_nervous_system	TTN	SY	V27803V						1	rs767194702	0	This gene encodes a large abundant protein of striated muscle. The product of this gene is divided into two	26	http://www.ncbi.nlm.nih.gov/pubmed?term=TTN[TIAB]+AND+cancer[MH]																							0
154	TTN-39	chr2	179448473	-	C	T	central_nervous_system	TTN	SY	H21812H						1		0	This gene encodes a large abundant protein of striated muscle. The product of this gene is divided into two	26	http://www.ncbi.nlm.nih.gov/pubmed?term=TTN[TIAB]+AND+cancer[MH]																							0
155	TTN-40	chr2	179639007	-	A	G	central_nervous_system	TTN	SY	V2328V						1		0	This gene encodes a large abundant protein of striated muscle. The product of this gene is divided into two	26	http://www.ncbi.nlm.nih.gov/pubmed?term=TTN[TIAB]+AND+cancer[MH]																							0
156	TTN-41	chr2	179435211	-	A	G	central_nervous_system	TTN	SY	G25216G						1		0	This gene encodes a large abundant protein of striated muscle. The product of this gene is divided into two	26	http://www.ncbi.nlm.nih.gov/pubmed?term=TTN[TIAB]+AND+cancer[MH]																							0
157	TTN-42	chr2	179458825	-	G	A	central_nervous_system	TTN	MS	R19432H	0.351	0.5				1	rs745631866	0	This gene encodes a large abundant protein of striated muscle. The product of this gene is divided into two	26	http://www.ncbi.nlm.nih.gov/pubmed?term=TTN[TIAB]+AND+cancer[MH]																							0				0.15505	0.25
158	TTN-43	chr2	179489416	-	T	C	central_nervous_system	TTN	MS	V14864A	0.0558	0.1				1		0	This gene encodes a large abundant protein of striated muscle. The product of this gene is divided into two	26	http://www.ncbi.nlm.nih.gov/pubmed?term=TTN[TIAB]+AND+cancer[MH]													../MuPIT_Interactive?gm=chr2:178624689										0				0.07358	0.15
159	TTN-44	chr2	179440231	-	A	G	central_nervous_system	TTN	MS	D23543G	0.046	0.1				1		0	This gene encodes a large abundant protein of striated muscle. The product of this gene is divided into two	26	http://www.ncbi.nlm.nih.gov/pubmed?term=TTN[TIAB]+AND+cancer[MH]																							0				0.05445	0.15
160	TTN-45	chr2	179621374	-	T	C	central_nervous_system	TTN	MS	V3610A	0.3678	0.55				1		0	This gene encodes a large abundant protein of striated muscle. The product of this gene is divided into two	26	http://www.ncbi.nlm.nih.gov/pubmed?term=TTN[TIAB]+AND+cancer[MH]																							0	intron	TTN	ENST00000342992.10(intron),ENST00000359218.9(intron),ENST00000460472.6(intron),ENST00000591111.5(intron),ENST00000615779.4(intron),ENST00000360870.9(intron)	0.56239	0.7
161	TTN-46	chr2	179396443	-	T	C	central_nervous_system	TTN	MS	S34967P	0.9496	1				1		0	This gene encodes a large abundant protein of striated muscle. The product of this gene is divided into two	26	http://www.ncbi.nlm.nih.gov/pubmed?term=TTN[TIAB]+AND+cancer[MH]													../MuPIT_Interactive?gm=chr2:178531716										0				0.08147	0.15
162	TTN-47	chr2	179458435	-	C	T	central_nervous_system	TTN	MS	T19531I	0.0186	0.05				1		0	This gene encodes a large abundant protein of striated muscle. The product of this gene is divided into two	26	http://www.ncbi.nlm.nih.gov/pubmed?term=TTN[TIAB]+AND+cancer[MH]																							0				0.11841	0.2
163	TTN-48	chr2	179416435	-	C	T	central_nervous_system	TTN	MS	R30398C	0.4194	0.6				1	rs765097933	0	This gene encodes a large abundant protein of striated muscle. The product of this gene is divided into two	26	http://www.ncbi.nlm.nih.gov/pubmed?term=TTN[TIAB]+AND+cancer[MH]																							0				0.18328	0.3
164	TTN-49	chr2	179553505	-	C	T	central_nervous_system	TTN	MS	A10699V	0.1422	0.25				1		0	This gene encodes a large abundant protein of striated muscle. The product of this gene is divided into two	26	http://www.ncbi.nlm.nih.gov/pubmed?term=TTN[TIAB]+AND+cancer[MH]																							0	intron	TTN	ENST00000342175.10(intron),ENST00000359218.9(intron),ENST00000460472.6(intron)	0.33752	0.45
165	TTN-50	chr2	179482209	-	C	T	central_nervous_system	TTN	MS	S15868F	0.0028	0.05				1		0	This gene encodes a large abundant protein of striated muscle. The product of this gene is divided into two	26	http://www.ncbi.nlm.nih.gov/pubmed?term=TTN[TIAB]+AND+cancer[MH]													../MuPIT_Interactive?gm=chr2:178617482										0				0.33225	0.45
166	TTN-51	chr2	179422145	-	A	G	central_nervous_system	TTN	MS	I29282V	0.1318	0.25				1		0	This gene encodes a large abundant protein of striated muscle. The product of this gene is divided into two	26	http://www.ncbi.nlm.nih.gov/pubmed?term=TTN[TIAB]+AND+cancer[MH]																							0				0.21941	0.35
167	TTN-52	chr2	179425576	-	A	G	central_nervous_system	TTN	MS	Y28428C	0.006	0.05				1		0	This gene encodes a large abundant protein of striated muscle. The product of this gene is divided into two	26	http://www.ncbi.nlm.nih.gov/pubmed?term=TTN[TIAB]+AND+cancer[MH]																							0				0.01559	0.05
168	TTN-53	chr2	179667003	-	G	A	central_nervous_system	TTN	MS	G53S	0.3302	0.5				1	rs150902810	5.81395e-05	This gene encodes a large abundant protein of striated muscle. The product of this gene is divided into two	26	http://www.ncbi.nlm.nih.gov/pubmed?term=TTN[TIAB]+AND+cancer[MH]													../MuPIT_Interactive?gm=chr2:178802276										0.000199681				0.04645	0.1
169	TTN-54	chr2	179642500	-	G	A	central_nervous_system	TTN	MS	G1471R	0.3786	0.55				1		0	This gene encodes a large abundant protein of striated muscle. The product of this gene is divided into two	26	http://www.ncbi.nlm.nih.gov/pubmed?term=TTN[TIAB]+AND+cancer[MH]													../MuPIT_Interactive?gm=chr2:178777773										0				0.01893	0.05
170	TTN-55	chr2	179484977	-	A	G	central_nervous_system	TTN	MS	Y15424C	0.0048	0.05				1		0	This gene encodes a large abundant protein of striated muscle. The product of this gene is divided into two	26	http://www.ncbi.nlm.nih.gov/pubmed?term=TTN[TIAB]+AND+cancer[MH]													../MuPIT_Interactive?gm=chr2:178620250										0				0.01326	0.05
171	TTN-56	chr2	179497514	-	C	T	central_nervous_system	TTN	MS	P14407S	0.0186	0.05				1		0	This gene encodes a large abundant protein of striated muscle. The product of this gene is divided into two	26	http://www.ncbi.nlm.nih.gov/pubmed?term=TTN[TIAB]+AND+cancer[MH]																							0				0.06973	0.15
172	TTN-57	chr2	179479364	-	A	G	central_nervous_system	TTN	MS	T16293A	0.167	0.3				1		0	This gene encodes a large abundant protein of striated muscle. The product of this gene is divided into two	26	http://www.ncbi.nlm.nih.gov/pubmed?term=TTN[TIAB]+AND+cancer[MH]													../MuPIT_Interactive?gm=chr2:178614637										0				0.09199	0.2
173	TTN-58	chr2	179596645	-	G	A	central_nervous_system	TTN	MS	D5653N	0.1122	0.2				1	rs267599067	0	This gene encodes a large abundant protein of striated muscle. The product of this gene is divided into two	26	http://www.ncbi.nlm.nih.gov/pubmed?term=TTN[TIAB]+AND+cancer[MH]																							0	intron	TTN	ENST00000342175.10(intron),ENST00000359218.9(intron),ENST00000460472.6(intron)	0.33752	0.45
174	TTN-59	chr2	179406171	-	C	T	central_nervous_system	TTN	SG	R32545*						1		0	This gene encodes a large abundant protein of striated muscle. The product of this gene is divided into two	26	http://www.ncbi.nlm.nih.gov/pubmed?term=TTN[TIAB]+AND+cancer[MH]																							0				0.01062	0.05
175	TTN-60	chr2	179469738	-	C	T	central_nervous_system	TTN	SG	R18056*						1	rs768431507	0	This gene encodes a large abundant protein of striated muscle. The product of this gene is divided into two	26	http://www.ncbi.nlm.nih.gov/pubmed?term=TTN[TIAB]+AND+cancer[MH]																							0				0.03013	0.1
176	TTN-61	chr2	179642442	-	G	T	central_nervous_system	TTN	MS	W1490L	0.0328	0.1				1		0	This gene encodes a large abundant protein of striated muscle. The product of this gene is divided into two	26	http://www.ncbi.nlm.nih.gov/pubmed?term=TTN[TIAB]+AND+cancer[MH]													../MuPIT_Interactive?gm=chr2:178777715										0				0.0164	0.05
177	TTN-62	chr2	179457977	-	G	A	central_nervous_system	TTN	MS	R19653Q	0.0884	0.15				1		0	This gene encodes a large abundant protein of striated muscle. The product of this gene is divided into two	26	http://www.ncbi.nlm.nih.gov/pubmed?term=TTN[TIAB]+AND+cancer[MH]																							0				0.08592	0.15
178	TTN-63	chr2	179392281	-	T	C	central_nervous_system	TTN	MS	S35858P	0.8382	1				1		0	This gene encodes a large abundant protein of striated muscle. The product of this gene is divided into two	26	http://www.ncbi.nlm.nih.gov/pubmed?term=TTN[TIAB]+AND+cancer[MH]																							0				0.08785	0.15
179	TTN-64	chr2	179392281	-	T	C	central_nervous_system	TTN	MS	S35858P	0.8382	1				1		0	This gene encodes a large abundant protein of striated muscle. The product of this gene is divided into two	26	http://www.ncbi.nlm.nih.gov/pubmed?term=TTN[TIAB]+AND+cancer[MH]																							0				0.08785	0.15
180	TTN-65	chr2	179528601	-	C	T	central_nervous_system	TTN	SY	R12131R						1	rs555029471	0	This gene encodes a large abundant protein of striated muscle. The product of this gene is divided into two	26	http://www.ncbi.nlm.nih.gov/pubmed?term=TTN[TIAB]+AND+cancer[MH]																							0	intron	TTN	ENST00000591111.5(intron),ENST00000342992.10(intron),ENST00000615779.4(intron),ENST00000342175.10(intron),ENST00000359218.9(intron),ENST00000460472.6(intron)
181	TTN-66	chr2	179575886	-	T	G	central_nervous_system	TTN	MS	N9359K	0.1364	0.25				1		0	This gene encodes a large abundant protein of striated muscle. The product of this gene is divided into two	26	http://www.ncbi.nlm.nih.gov/pubmed?term=TTN[TIAB]+AND+cancer[MH]																							0	intron	TTN	ENST00000342175.10(intron),ENST00000359218.9(intron),ENST00000460472.6(intron)	0.22073	0.35
182	TTN-67	chr2	179414490	-	C	T	central_nervous_system	TTN	SY	T30653T						1		0	This gene encodes a large abundant protein of striated muscle. The product of this gene is divided into two	26	http://www.ncbi.nlm.nih.gov/pubmed?term=TTN[TIAB]+AND+cancer[MH]																							0
183	TTN-68	chr2	179414490	-	C	T	central_nervous_system	TTN	SY	T30653T						1		0	This gene encodes a large abundant protein of striated muscle. The product of this gene is divided into two	26	http://www.ncbi.nlm.nih.gov/pubmed?term=TTN[TIAB]+AND+cancer[MH]																							0
184	TTN-69	chr2	179587435	-	A	G	central_nervous_system	TTN	SY	A7397A						1		0	This gene encodes a large abundant protein of striated muscle. The product of this gene is divided into two	26	http://www.ncbi.nlm.nih.gov/pubmed?term=TTN[TIAB]+AND+cancer[MH]																							0	intron	TTN	ENST00000342175.10(intron),ENST00000359218.9(intron),ENST00000460472.6(intron)
185	TTN-70	chr2	179446456	-	C	T	central_nervous_system	TTN	MS	P22180L	0.046	0.1				1		0	This gene encodes a large abundant protein of striated muscle. The product of this gene is divided into two	26	http://www.ncbi.nlm.nih.gov/pubmed?term=TTN[TIAB]+AND+cancer[MH]																							0				0.02156	0.05
186	TTN-71	chr2	179407135	-	G	A	central_nervous_system	TTN	MS	V32450I	0.945	1				1	rs397517769	0	This gene encodes a large abundant protein of striated muscle. The product of this gene is divided into two	26	http://www.ncbi.nlm.nih.gov/pubmed?term=TTN[TIAB]+AND+cancer[MH]																							0.000399361				0.17579	0.3
187	EGFR-1	chr7	55223610	+	G	T	central_nervous_system	EGFR	MS	C326F	0.0036	0.05	Pathogenic			1		0	The protein encoded by this gene is a transmembrane glycoprotein that is a member of the protein kinase	14009	http://www.ncbi.nlm.nih.gov/pubmed?term=EGFR[TIAB]+AND+cancer[MH]													../MuPIT_Interactive?gm=chr7:55155917									Erlotinib, Gefitinib, EGFR Inhibitors	0				0.00304	0.05
188	EGFR-2	chr7	55273227	+	A	G	central_nervous_system	EGFR	MS	N1184D	0.0624	0.15				1		0	The protein encoded by this gene is a transmembrane glycoprotein that is a member of the protein kinase	14009	http://www.ncbi.nlm.nih.gov/pubmed?term=EGFR[TIAB]+AND+cancer[MH]																						Erlotinib, Gefitinib, EGFR Inhibitors	0	intron	EGFR	ENST00000442591.5(intron)	0.18095	0.3
189	EGFR-3	chr7	55223596	+	C	T	central_nervous_system	EGFR	SY	D321D						1	rs764038041	0	The protein encoded by this gene is a transmembrane glycoprotein that is a member of the protein kinase	14009	http://www.ncbi.nlm.nih.gov/pubmed?term=EGFR[TIAB]+AND+cancer[MH]	2.03264e-05		8.93495e-05				8.96282e-06		3.24929e-05													Erlotinib, Gefitinib, EGFR Inhibitors	0
190	EGFR-4	chr7	55259548	+	A	G	central_nervous_system	EGFR	MS	Y869C	0	0.05		COSM26036	urinary_tract(1)	1		0	The protein encoded by this gene is a transmembrane glycoprotein that is a member of the protein kinase	14009	http://www.ncbi.nlm.nih.gov/pubmed?term=EGFR[TIAB]+AND+cancer[MH]	3.23039e-05				0.000616523								../MuPIT_Interactive?gm=chr7:55191855									Erlotinib, Gefitinib, EGFR Inhibitors	0	intron	EGFR	ENST00000442591.5(intron)	0.00374	0.05
191	EGFR-5	chr7	55223596	+	C	T	central_nervous_system	EGFR	SY	D321D						1	rs764038041	0	The protein encoded by this gene is a transmembrane glycoprotein that is a member of the protein kinase	14009	http://www.ncbi.nlm.nih.gov/pubmed?term=EGFR[TIAB]+AND+cancer[MH]	2.03264e-05		8.93495e-05				8.96282e-06		3.24929e-05													Erlotinib, Gefitinib, EGFR Inhibitors	0
192	EGFR-6	chr7	55259548	+	A	G	central_nervous_system	EGFR	MS	Y869C	0	0.05		COSM26036	urinary_tract(1)	1		0	The protein encoded by this gene is a transmembrane glycoprotein that is a member of the protein kinase	14009	http://www.ncbi.nlm.nih.gov/pubmed?term=EGFR[TIAB]+AND+cancer[MH]	3.23039e-05				0.000616523								../MuPIT_Interactive?gm=chr7:55191855									Erlotinib, Gefitinib, EGFR Inhibitors	0	intron	EGFR	ENST00000442591.5(intron)	0.00374	0.05
193	EGFR-7	chr7	55219021	+	C	T	central_nervous_system	EGFR	SY	S198S				COSM1488604	central_nervous_system(2)	1	rs370376501	0.000116279	The protein encoded by this gene is a transmembrane glycoprotein that is a member of the protein kinase	14009	http://www.ncbi.nlm.nih.gov/pubmed?term=EGFR[TIAB]+AND+cancer[MH]	0.00010099		2.90529e-05	9.85028e-05		0.000232648	0.000157808															Erlotinib, Gefitinib, EGFR Inhibitors	0
194	EGFR-8	chr7	55221822	+	C	T	central_nervous_system	EGFR	MS	A289V	0.0014	0.05		COSM21687	central_nervous_system(35)	1	rs149840192	0	The protein encoded by this gene is a transmembrane glycoprotein that is a member of the protein kinase	14009	http://www.ncbi.nlm.nih.gov/pubmed?term=EGFR[TIAB]+AND+cancer[MH]													../MuPIT_Interactive?gm=chr7:55154129	Yes								Erlotinib, Gefitinib, EGFR Inhibitors	0				0.01194	0.05
195	EGFR-9	chr7	55219021	+	C	T	central_nervous_system	EGFR	SY	S198S				COSM1488604	central_nervous_system(2)	1	rs370376501	0.000116279	The protein encoded by this gene is a transmembrane glycoprotein that is a member of the protein kinase	14009	http://www.ncbi.nlm.nih.gov/pubmed?term=EGFR[TIAB]+AND+cancer[MH]	0.00010099		2.90529e-05	9.85028e-05		0.000232648	0.000157808															Erlotinib, Gefitinib, EGFR Inhibitors	0
196	EGFR-10	chr7	55221822	+	C	T	central_nervous_system	EGFR	MS	A289V	0.0014	0.05		COSM21687	central_nervous_system(35)	1	rs149840192	0	The protein encoded by this gene is a transmembrane glycoprotein that is a member of the protein kinase	14009	http://www.ncbi.nlm.nih.gov/pubmed?term=EGFR[TIAB]+AND+cancer[MH]													../MuPIT_Interactive?gm=chr7:55154129	Yes								Erlotinib, Gefitinib, EGFR Inhibitors	0				0.01194	0.05
197	EGFR-11	chr7	55233043	+	G	T	central_nervous_system	EGFR	MS	G598V	0	0.05		COSM21690	lung(1); central_nervous_system(35)	1	rs139236063	0	The protein encoded by this gene is a transmembrane glycoprotein that is a member of the protein kinase	14009	http://www.ncbi.nlm.nih.gov/pubmed?term=EGFR[TIAB]+AND+cancer[MH]	4.06144e-06						8.95448e-06						../MuPIT_Interactive?gm=chr7:55165350	Yes								Erlotinib, Gefitinib, EGFR Inhibitors	0				0.01528	0.05
198	PTEN	chr10	89711965	+	T	A	central_nervous_system	PTEN	MS	F195I	0.0014	0.05				1		0	This gene was identified as a tumor suppressor that is mutated in a large number of cancers at high frequency. The protein encoded this gene is a phosphatidylinositol-3,4,5-trisphosphate 3-phosphatase. It contains a tensin like domain as well as a catalytic domain similar to that of the dual specificity protein tyrosine phosphatases. Unlike most of the protein tyrosine phosphatases, this protein …	4621	http://www.ncbi.nlm.nih.gov/pubmed?term=PTEN[TIAB]+AND+cancer[MH]													../MuPIT_Interactive?gm=chr10:87952208									PI3K/AKT/MTOR inhibitors	0				0.01265	0.05
199	MUC16-1	chr19	9067115	-	G	C	central_nervous_system	MUC16	MS	M6777I	0.2968	0.45		COSM1736045	central_nervous_system(1)	1		0	No GeneCards annotation	68	http://www.ncbi.nlm.nih.gov/pubmed?term=MUC16[TIAB]+AND+cancer[MH]																							0				0.63526	0.75
200	MUC16-2	chr19	9061470	-	C	T	central_nervous_system	MUC16	MS	S8659F	0.053	0.1		COSM3894099	skin(1)	1	rs768830849	0	No GeneCards annotation	68	http://www.ncbi.nlm.nih.gov/pubmed?term=MUC16[TIAB]+AND+cancer[MH]																							0				0.76723	0.9
201	MUC16-3	chr19	9090337	-	A	C	central_nervous_system	MUC16	MS	Q493P	0.1122	0.2				1		0	No GeneCards annotation	68	http://www.ncbi.nlm.nih.gov/pubmed?term=MUC16[TIAB]+AND+cancer[MH]																							0				0.61745	0.75
202	MUC16-4	chr19	9086095	-	C	A	central_nervous_system	MUC16	SG	S1907*						1		0	No GeneCards annotation	68	http://www.ncbi.nlm.nih.gov/pubmed?term=MUC16[TIAB]+AND+cancer[MH]																							0				0.29476	0.4
203	MUC16-5	chr19	9045679	-	T	C	central_nervous_system	MUC16	SY	S11984S						1		0	No GeneCards annotation	68	http://www.ncbi.nlm.nih.gov/pubmed?term=MUC16[TIAB]+AND+cancer[MH]																							0
204	MUC16-6	chr19	9060234	-	A	G	central_nervous_system	MUC16	MS	K9071R	0.6484	0.85				1		0	No GeneCards annotation	68	http://www.ncbi.nlm.nih.gov/pubmed?term=MUC16[TIAB]+AND+cancer[MH]																							0				0.99241	1
205	MUC16-7	chr19	9059420	-	A	G	central_nervous_system	MUC16	SY	S9342S						1		0	No GeneCards annotation	68	http://www.ncbi.nlm.nih.gov/pubmed?term=MUC16[TIAB]+AND+cancer[MH]																							0
206	MUC16-8	chr19	9063546	-	A	C	central_nervous_system	MUC16	MS	K7967T	0.2302	0.35				1		0	No GeneCards annotation	68	http://www.ncbi.nlm.nih.gov/pubmed?term=MUC16[TIAB]+AND+cancer[MH]																							0				0.83028	0.95
207	MUC16-9	chr19	9070240	-	G	T	central_nervous_system	MUC16	MS	V5736F	0.1974	0.3				1		0	No GeneCards annotation	68	http://www.ncbi.nlm.nih.gov/pubmed?term=MUC16[TIAB]+AND+cancer[MH]																							0				0.67169	0.8
208	MUC16-10	chr19	9082755	-	T	T	central_nervous_system	MUC16	SY	G3020G						1		0	No GeneCards annotation	68	http://www.ncbi.nlm.nih.gov/pubmed?term=MUC16[TIAB]+AND+cancer[MH]																							0
209	MUC16-11	chr19	9068468	-	T	C	central_nervous_system	MUC16	SY	Y6326Y						1		0	No GeneCards annotation	68	http://www.ncbi.nlm.nih.gov/pubmed?term=MUC16[TIAB]+AND+cancer[MH]																							0
210	MUC16-12	chr19	8973987	-	G	A	central_nervous_system	MUC16	SY	R14228R						1	rs779969789	0	No GeneCards annotation	68	http://www.ncbi.nlm.nih.gov/pubmed?term=MUC16[TIAB]+AND+cancer[MH]																							0
211	MUC16-13	chr19	9085622	-	C	C	central_nervous_system	MUC16	SY	P2065P						1		0	No GeneCards annotation	68	http://www.ncbi.nlm.nih.gov/pubmed?term=MUC16[TIAB]+AND+cancer[MH]																							0
212	MUC16-14	chr19	9061045	-	A	G	central_nervous_system	MUC16	MS	T8801A	0.3552	0.5				1		0	No GeneCards annotation	68	http://www.ncbi.nlm.nih.gov/pubmed?term=MUC16[TIAB]+AND+cancer[MH]																							0				0.9662	1
213	MUC16-15	chr19	9026313	-	G	T	central_nervous_system	MUC16	MS	A12225S	0.2152	0.35				1		0	No GeneCards annotation	68	http://www.ncbi.nlm.nih.gov/pubmed?term=MUC16[TIAB]+AND+cancer[MH]																							0				0.56857	0.7
214	MUC16-16	chr19	9087276	-	T	G	central_nervous_system	MUC16	MS	D1513E	0.3218	0.5				1	rs749532533	0	No GeneCards annotation	68	http://www.ncbi.nlm.nih.gov/pubmed?term=MUC16[TIAB]+AND+cancer[MH]																							0				0.98603	1
215	FLG-1	chr1	152276231	-	C	A	central_nervous_system	FLG	MS	L3711I	0.2828	0.45		COSM1191834	central_nervous_system(1)	1	rs779813285	0	The protein encoded by this gene is an intermediate filament-associated protein that aggregates keratin	58	http://www.ncbi.nlm.nih.gov/pubmed?term=FLG[TIAB]+AND+cancer[MH]																							0				0.56239	0.7
216	FLG-2	chr1	152277012	-	C	T	central_nervous_system	FLG	SY	Y3450Y				COSM5572592	prostate(1)	1	rs751349850	0	The protein encoded by this gene is an intermediate filament-associated protein that aggregates keratin	58	http://www.ncbi.nlm.nih.gov/pubmed?term=FLG[TIAB]+AND+cancer[MH]																							0
217	FLG-3	chr1	152277012	-	C	T	central_nervous_system	FLG	SY	Y3450Y				COSM5572592	prostate(1)	1	rs751349850	0	The protein encoded by this gene is an intermediate filament-associated protein that aggregates keratin	58	http://www.ncbi.nlm.nih.gov/pubmed?term=FLG[TIAB]+AND+cancer[MH]																							0
218	FLG-4	chr1	152277012	-	C	T	central_nervous_system	FLG	SY	Y3450Y				COSM5572592	prostate(1)	1	rs751349850	0	The protein encoded by this gene is an intermediate filament-associated protein that aggregates keratin	58	http://www.ncbi.nlm.nih.gov/pubmed?term=FLG[TIAB]+AND+cancer[MH]																							0
219	FLG-5	chr1	152276459	-	G	A	central_nervous_system	FLG	MS	D3635N	0.2874	0.45		COSM4142668	thyroid(1); large_intestine(2)	1	rs75448155	0.0648875	The protein encoded by this gene is an intermediate filament-associated protein that aggregates keratin	58	http://www.ncbi.nlm.nih.gov/pubmed?term=FLG[TIAB]+AND+cancer[MH]																							0				0.9662	1
220	FLG-6	chr1	152276459	-	G	A	central_nervous_system	FLG	MS	D3635N	0.2874	0.45		COSM4142668	thyroid(1); large_intestine(2)	1	rs75448155	0.0648875	The protein encoded by this gene is an intermediate filament-associated protein that aggregates keratin	58	http://www.ncbi.nlm.nih.gov/pubmed?term=FLG[TIAB]+AND+cancer[MH]																							0				0.9662	1
221	FLG-7	chr1	152278655	-	G	A	central_nervous_system	FLG	MS	D2903N	0.2242	0.35		COSM2153109	central_nervous_system(2)	1		0	The protein encoded by this gene is an intermediate filament-associated protein that aggregates keratin	58	http://www.ncbi.nlm.nih.gov/pubmed?term=FLG[TIAB]+AND+cancer[MH]																							0				0.45785	0.6
222	FLG-8	chr1	152278655	-	G	A	central_nervous_system	FLG	MS	D2903N	0.2242	0.35		COSM2153109	central_nervous_system(2)	1		0	The protein encoded by this gene is an intermediate filament-associated protein that aggregates keratin	58	http://www.ncbi.nlm.nih.gov/pubmed?term=FLG[TIAB]+AND+cancer[MH]																							0				0.45785	0.6
223	FLG-9	chr1	152282683	-	G	A	central_nervous_system	FLG	MS	R1560H	0.3678	0.55				1	rs376401439	0.000113482	The protein encoded by this gene is an intermediate filament-associated protein that aggregates keratin	58	http://www.ncbi.nlm.nih.gov/pubmed?term=FLG[TIAB]+AND+cancer[MH]																							0				0.95405	1
224	FLG-10	chr1	152282561	-	G	C	central_nervous_system	FLG	MS	E1601Q	0.2642	0.4				1	rs774105195	0	The protein encoded by this gene is an intermediate filament-associated protein that aggregates keratin	58	http://www.ncbi.nlm.nih.gov/pubmed?term=FLG[TIAB]+AND+cancer[MH]																							0				0.81227	0.95
225	MUC4-1	chr3	195514585	-	C	T	central_nervous_system	MUC4	MS	A1289V	0.942	1				1		0	The major constituents of mucus, the viscous secretion that covers epithelial surfaces such as those in the	250	http://www.ncbi.nlm.nih.gov/pubmed?term=MUC4[TIAB]+AND+cancer[MH]																							0	intron	MUC4	ENST00000349607.8(intron),ENST00000346145.8(intron)	0.90133	1
226	MUC4-2	chr3	195514214	-	G	A	central_nervous_system	MUC4	MS	D1413N	0.9744	1				1	rs753146760	0	The major constituents of mucus, the viscous secretion that covers epithelial surfaces such as those in the	250	http://www.ncbi.nlm.nih.gov/pubmed?term=MUC4[TIAB]+AND+cancer[MH]																							0	intron	MUC4	ENST00000349607.8(intron),ENST00000346145.8(intron)	0.9493	1
227	MUC4-3	chr3	195507733	-	G	T	central_nervous_system	MUC4	MS	S3573I	0.9818	1				1	rs199726341	0	The major constituents of mucus, the viscous secretion that covers epithelial surfaces such as those in the	250	http://www.ncbi.nlm.nih.gov/pubmed?term=MUC4[TIAB]+AND+cancer[MH]																							0	intron	MUC4	ENST00000349607.8(intron),ENST00000346145.8(intron)	0.9163	1
228	MUC4-4	chr3	195484133	-	G	C	central_nervous_system	MUC4	MS	S5018T	0.3742	0.55		COSM1736048	central_nervous_system(1)	1		0	The major constituents of mucus, the viscous secretion that covers epithelial surfaces such as those in the	250	http://www.ncbi.nlm.nih.gov/pubmed?term=MUC4[TIAB]+AND+cancer[MH]																							0				0.57778	0.7
229	MUC4-5	chr3	195477951	-	T	C	central_nervous_system	MUC4	MS	I5227T	0.3818	0.55				1		0	The major constituents of mucus, the viscous secretion that covers epithelial surfaces such as those in the	250	http://www.ncbi.nlm.nih.gov/pubmed?term=MUC4[TIAB]+AND+cancer[MH]																							0				0.82198	0.95
230	MUC4-6	chr3	195510470	-	A	G	central_nervous_system	MUC4	MS	S2661G	0.9974	1				1	rs756052204	0	The major constituents of mucus, the viscous secretion that covers epithelial surfaces such as those in the	250	http://www.ncbi.nlm.nih.gov/pubmed?term=MUC4[TIAB]+AND+cancer[MH]																							0	intron	MUC4	ENST00000349607.8(intron),ENST00000346145.8(intron)	0.94201	1
231	MUC4-7	chr3	195510470	-	A	G	central_nervous_system	MUC4	MS	S2661G	0.9974	1				1	rs756052204	0	The major constituents of mucus, the viscous secretion that covers epithelial surfaces such as those in the	250	http://www.ncbi.nlm.nih.gov/pubmed?term=MUC4[TIAB]+AND+cancer[MH]																							0	intron	MUC4	ENST00000349607.8(intron),ENST00000346145.8(intron)	0.94201	1
232	MUC4-8	chr3	195512916	-	C	T	central_nervous_system	MUC4	SY	I1845I						1		0	The major constituents of mucus, the viscous secretion that covers epithelial surfaces such as those in the	250	http://www.ncbi.nlm.nih.gov/pubmed?term=MUC4[TIAB]+AND+cancer[MH]																							0	intron	MUC4	ENST00000349607.8(intron),ENST00000346145.8(intron)
233	MUC4-9	chr3	195512916	-	C	T	central_nervous_system	MUC4	SY	I1845I						1		0	The major constituents of mucus, the viscous secretion that covers epithelial surfaces such as those in the	250	http://www.ncbi.nlm.nih.gov/pubmed?term=MUC4[TIAB]+AND+cancer[MH]																							0	intron	MUC4	ENST00000349607.8(intron),ENST00000346145.8(intron)
234	MUC4-10	chr3	195511959	-	C	T	central_nervous_system	MUC4	SY	T2164T						1	rs369770584	0	The major constituents of mucus, the viscous secretion that covers epithelial surfaces such as those in the	250	http://www.ncbi.nlm.nih.gov/pubmed?term=MUC4[TIAB]+AND+cancer[MH]																							0	intron	MUC4	ENST00000349607.8(intron),ENST00000346145.8(intron)
235	SYNE1-1	chr6	152473235	-	A	G	central_nervous_system	SYNE1	SY	E8057E						1		0	This gene encodes a spectrin repeat containing protein expressed in skeletal and smooth muscle, and peripheral	9	http://www.ncbi.nlm.nih.gov/pubmed?term=SYNE1[TIAB]+AND+cancer[MH]																							0
236	SYNE1-2	chr6	152737665	-	G	A	central_nervous_system	SYNE1	SY	K1969K						1		0	This gene encodes a spectrin repeat containing protein expressed in skeletal and smooth muscle, and peripheral	9	http://www.ncbi.nlm.nih.gov/pubmed?term=SYNE1[TIAB]+AND+cancer[MH]																							0
237	SYNE1-3	chr6	152576825	-	C	T	central_nervous_system	SYNE1	SY	V6387V						1	rs9479281	0	This gene encodes a spectrin repeat containing protein expressed in skeletal and smooth muscle, and peripheral	9	http://www.ncbi.nlm.nih.gov/pubmed?term=SYNE1[TIAB]+AND+cancer[MH]																							0
238	SYNE1-4	chr6	152614868	-	G	A	central_nervous_system	SYNE1	MS	R5956H	0.3786	0.55				1	rs80265744	0	This gene encodes a spectrin repeat containing protein expressed in skeletal and smooth muscle, and peripheral	9	http://www.ncbi.nlm.nih.gov/pubmed?term=SYNE1[TIAB]+AND+cancer[MH]																							0.000998403				0.23753	0.35
239	SYNE1-5	chr6	152719788	-	G	A	central_nervous_system	SYNE1	MS	S2439N	0.4528	0.65				1		0	This gene encodes a spectrin repeat containing protein expressed in skeletal and smooth muscle, and peripheral	9	http://www.ncbi.nlm.nih.gov/pubmed?term=SYNE1[TIAB]+AND+cancer[MH]																							0				0.28853	0.4
240	SYNE1-6	chr6	152679570	-	G	A	central_nervous_system	SYNE1	MS	D3516N	0.5388	0.7				1	rs758523137	0	This gene encodes a spectrin repeat containing protein expressed in skeletal and smooth muscle, and peripheral	9	http://www.ncbi.nlm.nih.gov/pubmed?term=SYNE1[TIAB]+AND+cancer[MH]																							0				0.46301	0.6
241	SYNE1-7	chr6	152555853	-	A	G	central_nervous_system	SYNE1	MS	T6827A	0.2034	0.35				1		0	This gene encodes a spectrin repeat containing protein expressed in skeletal and smooth muscle, and peripheral	9	http://www.ncbi.nlm.nih.gov/pubmed?term=SYNE1[TIAB]+AND+cancer[MH]													../MuPIT_Interactive?gm=chr6:152234718										0				0.25918	0.35
242	SYNE1-8	chr6	152443774	-	C	T	central_nervous_system	SYNE1	MS	P8731S	0.3258	0.5				1		0	This gene encodes a spectrin repeat containing protein expressed in skeletal and smooth muscle, and peripheral	9	http://www.ncbi.nlm.nih.gov/pubmed?term=SYNE1[TIAB]+AND+cancer[MH]																							0	intron	ESR1	ENST00000427531.6(intron)	0.54539	0.7
243	SYNE1-9	chr6	152826458	-	C	T	central_nervous_system	SYNE1	MS	A219V	0.219	0.35		COSM3859726	stomach(1)	1		0	This gene encodes a spectrin repeat containing protein expressed in skeletal and smooth muscle, and peripheral	9	http://www.ncbi.nlm.nih.gov/pubmed?term=SYNE1[TIAB]+AND+cancer[MH]													../MuPIT_Interactive?gm=chr6:152505323										0				0.01801	0.05
244	SYNE1-10	chr6	152737665	-	G	A	central_nervous_system	SYNE1	SY	K1969K						1		0	This gene encodes a spectrin repeat containing protein expressed in skeletal and smooth muscle, and peripheral	9	http://www.ncbi.nlm.nih.gov/pubmed?term=SYNE1[TIAB]+AND+cancer[MH]																							0
245	SYNE1-11	chr6	152576825	-	C	T	central_nervous_system	SYNE1	SY	V6387V						1	rs9479281	0	This gene encodes a spectrin repeat containing protein expressed in skeletal and smooth muscle, and peripheral	9	http://www.ncbi.nlm.nih.gov/pubmed?term=SYNE1[TIAB]+AND+cancer[MH]																							0
246	SYNE1-12	chr6	152716776	-	A	G	central_nervous_system	SYNE1	SY	L2529L						1	rs141499089	5.81395e-05	This gene encodes a spectrin repeat containing protein expressed in skeletal and smooth muscle, and peripheral	9	http://www.ncbi.nlm.nih.gov/pubmed?term=SYNE1[TIAB]+AND+cancer[MH]																							0
247	SYNE1-13	chr6	152806039	-	A	G	central_nervous_system	SYNE1	SY	L372L						1		0	This gene encodes a spectrin repeat containing protein expressed in skeletal and smooth muscle, and peripheral	9	http://www.ncbi.nlm.nih.gov/pubmed?term=SYNE1[TIAB]+AND+cancer[MH]																							0
248	SYNE1-14	chr6	152456318	-	A	G	central_nervous_system	SYNE1	MS	D8570G	0.0046	0.05				1		0	This gene encodes a spectrin repeat containing protein expressed in skeletal and smooth muscle, and peripheral	9	http://www.ncbi.nlm.nih.gov/pubmed?term=SYNE1[TIAB]+AND+cancer[MH]																							0				0.01295	0.05
249	SYNE1-15	chr6	152614868	-	G	A	central_nervous_system	SYNE1	MS	R5956H	0.3786	0.55				1	rs80265744	0	This gene encodes a spectrin repeat containing protein expressed in skeletal and smooth muscle, and peripheral	9	http://www.ncbi.nlm.nih.gov/pubmed?term=SYNE1[TIAB]+AND+cancer[MH]																							0.000998403				0.23753	0.35
250	SYNE1-16	chr6	152719788	-	G	A	central_nervous_system	SYNE1	MS	S2439N	0.4528	0.65				1		0	This gene encodes a spectrin repeat containing protein expressed in skeletal and smooth muscle, and peripheral	9	http://www.ncbi.nlm.nih.gov/pubmed?term=SYNE1[TIAB]+AND+cancer[MH]																							0				0.28853	0.4
251	SYNE1-17	chr6	152679570	-	G	A	central_nervous_system	SYNE1	MS	D3516N	0.5388	0.7				1	rs758523137	0	This gene encodes a spectrin repeat containing protein expressed in skeletal and smooth muscle, and peripheral	9	http://www.ncbi.nlm.nih.gov/pubmed?term=SYNE1[TIAB]+AND+cancer[MH]																							0				0.46301	0.6
252	SYNE1-18	chr6	152443774	-	C	T	central_nervous_system	SYNE1	MS	P8731S	0.3258	0.5				1		0	This gene encodes a spectrin repeat containing protein expressed in skeletal and smooth muscle, and peripheral	9	http://www.ncbi.nlm.nih.gov/pubmed?term=SYNE1[TIAB]+AND+cancer[MH]																							0	intron	ESR1	ENST00000427531.6(intron)	0.54539	0.7
253	SYNE1-19	chr6	152826458	-	C	T	central_nervous_system	SYNE1	MS	A219V	0.219	0.35		COSM3859726	stomach(1)	1		0	This gene encodes a spectrin repeat containing protein expressed in skeletal and smooth muscle, and peripheral	9	http://www.ncbi.nlm.nih.gov/pubmed?term=SYNE1[TIAB]+AND+cancer[MH]													../MuPIT_Interactive?gm=chr6:152505323										0				0.01801	0.05
254	SYNE1-20	chr6	152651902	-	T	A	central_nervous_system	SYNE1	MS	Y4640N	0.1192	0.2				1		0	This gene encodes a spectrin repeat containing protein expressed in skeletal and smooth muscle, and peripheral	9	http://www.ncbi.nlm.nih.gov/pubmed?term=SYNE1[TIAB]+AND+cancer[MH]																							0	3' UTR	SYNE1	ENST00000448038.2(3' UTR)	0.01538	0.05
255	SYNE1-21	chr6	152737569	-	T	C	central_nervous_system	SYNE1	SY	T2001T				COSM2153313	stomach(1); central_nervous_system(2)	1		0	This gene encodes a spectrin repeat containing protein expressed in skeletal and smooth muscle, and peripheral	9	http://www.ncbi.nlm.nih.gov/pubmed?term=SYNE1[TIAB]+AND+cancer[MH]																							0
256	SYNE1-22	chr6	152737569	-	T	C	central_nervous_system	SYNE1	SY	T2001T				COSM2153313	stomach(1); central_nervous_system(2)	1		0	This gene encodes a spectrin repeat containing protein expressed in skeletal and smooth muscle, and peripheral	9	http://www.ncbi.nlm.nih.gov/pubmed?term=SYNE1[TIAB]+AND+cancer[MH]																							0
257	SYNE1-23	chr6	152771950	-	G	T	central_nervous_system	SYNE1	MS	G1069C	0.0238	0.05				1		0	This gene encodes a spectrin repeat containing protein expressed in skeletal and smooth muscle, and peripheral	9	http://www.ncbi.nlm.nih.gov/pubmed?term=SYNE1[TIAB]+AND+cancer[MH]																							0				0.12398	0.2
258	SYNE1-24	chr6	152655164	-	C	A	central_nervous_system	SYNE1	MS	T4258K	0.6608	0.85				1		0	This gene encodes a spectrin repeat containing protein expressed in skeletal and smooth muscle, and peripheral	9	http://www.ncbi.nlm.nih.gov/pubmed?term=SYNE1[TIAB]+AND+cancer[MH]																							0	3' UTR	SYNE1	ENST00000448038.2(3' UTR)	0.77502	0.9
259	SYNE1-25	chr6	152630990	-	C	T	central_nervous_system	SYNE1	SG	Q5728*						1		0	This gene encodes a spectrin repeat containing protein expressed in skeletal and smooth muscle, and peripheral	9	http://www.ncbi.nlm.nih.gov/pubmed?term=SYNE1[TIAB]+AND+cancer[MH]																							0				0.00889	0.05
260	AMBRA1-1	chr11	46439529	-	T	C	central_nervous_system	AMBRA1	MS	L1017P	0.0198	0.05		COSM1736415	central_nervous_system(1)	1		0	No GeneCards annotation	3	http://www.ncbi.nlm.nih.gov/pubmed?term=AMBRA1[TIAB]+AND+cancer[MH]																							0				0.00223	0.05
261	AMBRA1-2	chr11	46419036	-	C	T	central_nervous_system	AMBRA1	SY	D1287D						1	rs370073097	0.000116306	No GeneCards annotation	3	http://www.ncbi.nlm.nih.gov/pubmed?term=AMBRA1[TIAB]+AND+cancer[MH]																							0
262	AMBRA1-3	chr11	46419036	-	C	T	central_nervous_system	AMBRA1	SY	D1287D						1	rs370073097	0.000116306	No GeneCards annotation	3	http://www.ncbi.nlm.nih.gov/pubmed?term=AMBRA1[TIAB]+AND+cancer[MH]																							0
263	AMBRA1-4	chr11	46419036	-	C	T	central_nervous_system	AMBRA1	SY	D1287D						1	rs370073097	0.000116306	No GeneCards annotation	3	http://www.ncbi.nlm.nih.gov/pubmed?term=AMBRA1[TIAB]+AND+cancer[MH]																							0
264	AMBRA1-5	chr11	46569852	-	C	T	central_nervous_system	AMBRA1	MS	R27W	0.0266	0.05				1	rs377257005	0.000113584	No GeneCards annotation	3	http://www.ncbi.nlm.nih.gov/pubmed?term=AMBRA1[TIAB]+AND+cancer[MH]																							0				0.03957	0.1
265	AMBRA1-6	chr11	46419036	-	C	T	central_nervous_system	AMBRA1	SY	D1287D						1	rs370073097	0.000116306	No GeneCards annotation	3	http://www.ncbi.nlm.nih.gov/pubmed?term=AMBRA1[TIAB]+AND+cancer[MH]																							0
266	AMBRA1-7	chr11	46569852	-	C	T	central_nervous_system	AMBRA1	MS	R27W	0.0266	0.05				1	rs377257005	0.000113584	No GeneCards annotation	3	http://www.ncbi.nlm.nih.gov/pubmed?term=AMBRA1[TIAB]+AND+cancer[MH]																							0				0.03957	0.1
267	AMBRA1-8	chr11	46455113	-	C	T	central_nervous_system	AMBRA1	SG	R963*				COSM41150	stomach(1); central_nervous_system(2)	1		0	No GeneCards annotation	3	http://www.ncbi.nlm.nih.gov/pubmed?term=AMBRA1[TIAB]+AND+cancer[MH]																							0				0.06784	0.15
268	AMBRA1-9	chr11	46568697	-	G	T	central_nervous_system	AMBRA1	MS	C115F	0.015	0.05		COSM2153106	central_nervous_system(2)	1		0	No GeneCards annotation	3	http://www.ncbi.nlm.nih.gov/pubmed?term=AMBRA1[TIAB]+AND+cancer[MH]													../MuPIT_Interactive?gm=chr11:46547147										0				0.00557	0.05
269	AMBRA1-10	chr11	46568697	-	G	T	central_nervous_system	AMBRA1	MS	C115F	0.015	0.05		COSM2153106	central_nervous_system(2)	1		0	No GeneCards annotation	3	http://www.ncbi.nlm.nih.gov/pubmed?term=AMBRA1[TIAB]+AND+cancer[MH]													../MuPIT_Interactive?gm=chr11:46547147										0				0.00557	0.05
270	DLG5-1	chr10	79565562	-	C	T	central_nervous_system	DLG5	SY	S1675S						1	rs758222263	0	This gene encodes a member of the family of discs large (DLG) homologs, a subset of the membrane-associated	6	http://www.ncbi.nlm.nih.gov/pubmed?term=DLG5[TIAB]+AND+cancer[MH]																							0
271	DLG5-2	chr10	79567631	-	C	T	central_nervous_system	DLG5	SY	G1573G						1	rs776480375	0	This gene encodes a member of the family of discs large (DLG) homologs, a subset of the membrane-associated	6	http://www.ncbi.nlm.nih.gov/pubmed?term=DLG5[TIAB]+AND+cancer[MH]																							0
272	DLG5-3	chr10	79565562	-	C	T	central_nervous_system	DLG5	SY	S1675S						1	rs758222263	0	This gene encodes a member of the family of discs large (DLG) homologs, a subset of the membrane-associated	6	http://www.ncbi.nlm.nih.gov/pubmed?term=DLG5[TIAB]+AND+cancer[MH]																							0
273	DLG5-4	chr10	79571808	-	G	A	central_nervous_system	DLG5	MS	G1399D	0.0014	0.05		COSM3397260	central_nervous_system(2)	1	rs867933458	0	This gene encodes a member of the family of discs large (DLG) homologs, a subset of the membrane-associated	6	http://www.ncbi.nlm.nih.gov/pubmed?term=DLG5[TIAB]+AND+cancer[MH]													../MuPIT_Interactive?gm=chr10:77812050										0				0.00283	0.05
274	DLG5-5	chr10	79581581	-	C	G	central_nervous_system	DLG5	SY	A887A						1		0	This gene encodes a member of the family of discs large (DLG) homologs, a subset of the membrane-associated	6	http://www.ncbi.nlm.nih.gov/pubmed?term=DLG5[TIAB]+AND+cancer[MH]																							0
275	DLG5-6	chr10	79572055	-	A	G	central_nervous_system	DLG5	MS	K1369R	0.262	0.4				1	rs749461950	0	This gene encodes a member of the family of discs large (DLG) homologs, a subset of the membrane-associated	6	http://www.ncbi.nlm.nih.gov/pubmed?term=DLG5[TIAB]+AND+cancer[MH]													../MuPIT_Interactive?gm=chr10:77812297										0				0.26121	0.35
276	DLG5-7	chr10	79565551	-	C	G	central_nervous_system	DLG5	MS	T1679R	0.0976	0.2				1		0	This gene encodes a member of the family of discs large (DLG) homologs, a subset of the membrane-associated	6	http://www.ncbi.nlm.nih.gov/pubmed?term=DLG5[TIAB]+AND+cancer[MH]																							0				0.19553	0.3
277	DLG5-8	chr10	79581222	-	C	T	central_nervous_system	DLG5	MS	A1007V	0.396	0.55		COSM1349237	large_intestine(1); central_nervous_system(2)	1	rs748210887	0	This gene encodes a member of the family of discs large (DLG) homologs, a subset of the membrane-associated	6	http://www.ncbi.nlm.nih.gov/pubmed?term=DLG5[TIAB]+AND+cancer[MH]																							0				0.91843	1
278	DLG5-9	chr10	79581222	-	C	T	central_nervous_system	DLG5	MS	A1007V	0.396	0.55		COSM1349237	large_intestine(1); central_nervous_system(2)	1	rs748210887	0	This gene encodes a member of the family of discs large (DLG) homologs, a subset of the membrane-associated	6	http://www.ncbi.nlm.nih.gov/pubmed?term=DLG5[TIAB]+AND+cancer[MH]																							0				0.91843	1
279	ZNF429-1	chr19	21719119	+	G	T	central_nervous_system	ZNF429	MS	E88D	0.5774	0.75				1		0	No GeneCards annotation	0																								0	intron	ZNF429	ENST00000597078.5(intron)	0.53537	0.65
280	ZNF429-2	chr19	21719187	+	T	C	central_nervous_system	ZNF429	MS	L111S	0.4418	0.6				1		0	No GeneCards annotation	0																								0	intron	ZNF429	ENST00000597078.5(intron)	0.45977	0.6
281	ZNF429-3	chr19	21719119	+	G	T	central_nervous_system	ZNF429	MS	E88D	0.5774	0.75				1		0	No GeneCards annotation	0																								0	intron	ZNF429	ENST00000597078.5(intron)	0.53537	0.65
282	ZNF429-4	chr19	21720523	+	G	A	central_nervous_system	ZNF429	SY	K556K				COSM1559529	central_nervous_system(34)	1	rs771237128	0	No GeneCards annotation	0		4.06719e-06								3.24971e-05														0	intron	ZNF429	ENST00000597078.5(intron)
283	ZNF429-5	chr19	21720870	+	G	A	central_nervous_system	ZNF429	MS	R672H	0.9054	1		COSM1559535	urinary_tract(1); central_nervous_system(32)	1	rs201032310	0	No GeneCards annotation	0		0.00321685	0.00106157	0.00166188	0.0044837	6.04084e-05	0.0042484	0.00472487	0.00310559	0.00146492				../MuPIT_Interactive?gm=chr19:21538068						SINE	Alu	AluY		0.00119808	intron	ZNF429	ENST00000597078.5(intron),ENST00000618549.1(intron)	0.96377	1
284	ZNF429-6	chr19	21720133	+	T	A	central_nervous_system	ZNF429	MS	N426K	0.8036	1		COSM1559521	oesophagus(1); central_nervous_system(11)	1		0	No GeneCards annotation	0		3.6453e-06						7.9862e-06						../MuPIT_Interactive?gm=chr19:21537331										0	intron	ZNF429	ENST00000597078.5(intron)	0.67999	0.8
285	ZNF429-7	chr19	21720557	+	A	G	central_nervous_system	ZNF429	MS	K568E	0.8662	1		COSM1559532	central_nervous_system(35)	1		0	No GeneCards annotation	0														../MuPIT_Interactive?gm=chr19:21537755										0	intron	ZNF429	ENST00000597078.5(intron)	0.67038	0.8
286	ZNF429-8	chr19	21720153	+	T	C	central_nervous_system	ZNF429	MS	V433A	0.7162	0.9		COSM1559522	central_nervous_system(14)	1		0	No GeneCards annotation	0		7.7238e-05	0.000138427	0.00128205										../MuPIT_Interactive?gm=chr19:21537351										0	intron	ZNF429	ENST00000597078.5(intron)	0.69204	0.8
287	ZNF429-9	chr19	21720870	+	G	A	central_nervous_system	ZNF429	MS	R672H	0.9054	1		COSM1559535	urinary_tract(1); central_nervous_system(32)	1	rs201032310	0	No GeneCards annotation	0		0.00321685	0.00106157	0.00166188	0.0044837	6.04084e-05	0.0042484	0.00472487	0.00310559	0.00146492				../MuPIT_Interactive?gm=chr19:21538068						SINE	Alu	AluY		0.00119808	intron	ZNF429	ENST00000597078.5(intron),ENST00000618549.1(intron)	0.96377	1
288	ZNF429-10	chr19	21720523	+	G	A	central_nervous_system	ZNF429	SY	K556K				COSM1559529	central_nervous_system(34)	1	rs771237128	0	No GeneCards annotation	0		4.06719e-06								3.24971e-05														0	intron	ZNF429	ENST00000597078.5(intron)
289	ZNF429-11	chr19	21720870	+	G	A	central_nervous_system	ZNF429	MS	R672H	0.9054	1		COSM1559535	urinary_tract(1); central_nervous_system(32)	1	rs201032310	0	No GeneCards annotation	0		0.00321685	0.00106157	0.00166188	0.0044837	6.04084e-05	0.0042484	0.00472487	0.00310559	0.00146492				../MuPIT_Interactive?gm=chr19:21538068						SINE	Alu	AluY		0.00119808	intron	ZNF429	ENST00000597078.5(intron),ENST00000618549.1(intron)	0.96377	1
290	ZNF429-12	chr19	21720557	+	A	G	central_nervous_system	ZNF429	MS	K568E	0.8662	1		COSM1559532	central_nervous_system(35)	1		0	No GeneCards annotation	0														../MuPIT_Interactive?gm=chr19:21537755										0	intron	ZNF429	ENST00000597078.5(intron)	0.67038	0.8
291	CHEK2-1	chr22	29091840	-	A	G	central_nervous_system	CHEK2	MS	K416E	0.004	0.05		COSM42871	large_intestine(7); stomach(1); central_nervous_system(15); endometrium(1); skin(5); prostate(6); kidney(11); pancreas(2)	1	rs142470496	0	In response to DNA damage and replication blocks, cell cycle progression is halted through the control of critical cell cycle regulators. The protein encoded by this gene is a cell cycle checkpoint regulator and putative tumor suppressor. It contains a forkhead-associated protein interaction domain essential for activation in response to DNA damage and is rapidly phosphorylated in response to rep…	306	http://www.ncbi.nlm.nih.gov/pubmed?term=CHEK2[TIAB]+AND+cancer[MH]													../MuPIT_Interactive?gm=chr22:28695852	Yes									0				0.13855	0.25
292	CHEK2-2	chr22	29083962	-	C	G	central_nervous_system	CHEK2	MS	R562G	0.4146	0.6		COSM478842	ovary(7); haematopoietic_and_lymphoid_tissue(1); central_nervous_system(22); kidney(1); pancreas(1)	1	rs200432447	0	In response to DNA damage and replication blocks, cell cycle progression is halted through the control of critical cell cycle regulators. The protein encoded by this gene is a cell cycle checkpoint regulator and putative tumor suppressor. It contains a forkhead-associated protein interaction domain essential for activation in response to DNA damage and is rapidly phosphorylated in response to rep…	306	http://www.ncbi.nlm.nih.gov/pubmed?term=CHEK2[TIAB]+AND+cancer[MH]													../MuPIT_Interactive?gm=chr22:28687974										0				0.22923	0.35
293	CHEK2-3	chr22	29083951	-	C	T	central_nervous_system	CHEK2	SY	P565P				COSM1327287	ovary(6); central_nervous_system(23)	1	rs202104749	0	In response to DNA damage and replication blocks, cell cycle progression is halted through the control of critical cell cycle regulators. The protein encoded by this gene is a cell cycle checkpoint regulator and putative tumor suppressor. It contains a forkhead-associated protein interaction domain essential for activation in response to DNA damage and is rapidly phosphorylated in response to rep…	306	http://www.ncbi.nlm.nih.gov/pubmed?term=CHEK2[TIAB]+AND+cancer[MH]																							0
294	CHEK2-4	chr22	29091788	-	A	G	central_nervous_system	CHEK2	MS	Y433C	0	0.05		COSM1559600	central_nervous_system(37)	1	rs200928781	0	In response to DNA damage and replication blocks, cell cycle progression is halted through the control of critical cell cycle regulators. The protein encoded by this gene is a cell cycle checkpoint regulator and putative tumor suppressor. It contains a forkhead-associated protein interaction domain essential for activation in response to DNA damage and is rapidly phosphorylated in response to rep…	306	http://www.ncbi.nlm.nih.gov/pubmed?term=CHEK2[TIAB]+AND+cancer[MH]													../MuPIT_Interactive?gm=chr22:28695800										0				0.00071	0.05
295	RYR2-1	chr1	237729906	+	T	A	central_nervous_system	RYR2	MS	F1085Y	0.1156	0.2				1		0	This gene encodes a ryanodine receptor found in cardiac muscle sarcoplasmic reticulum. The encoded protein is one	75	http://www.ncbi.nlm.nih.gov/pubmed?term=RYR2[MH]+AND+cancer[MH]													../MuPIT_Interactive?gm=chr1:237566606										0				0.13339	0.25
296	RYR2-2	chr1	237632412	+	C	T	central_nervous_system	RYR2	MS	R545C	0.6202	0.8		COSM3485701	skin(1)	1		0	This gene encodes a ryanodine receptor found in cardiac muscle sarcoplasmic reticulum. The encoded protein is one	75	http://www.ncbi.nlm.nih.gov/pubmed?term=RYR2[MH]+AND+cancer[MH]													../MuPIT_Interactive?gm=chr1:237469112										0				0.00961	0.05
297	RYR2-3	chr1	237791161	+	T	C	central_nervous_system	RYR2	MS	V2074A	0.1334	0.25				1		0	This gene encodes a ryanodine receptor found in cardiac muscle sarcoplasmic reticulum. The encoded protein is one	75	http://www.ncbi.nlm.nih.gov/pubmed?term=RYR2[MH]+AND+cancer[MH]													../MuPIT_Interactive?gm=chr1:237627861										0				0.21577	0.35
298	RYR2-4	chr1	237923145	+	T	C	central_nervous_system	RYR2	MS	S3799P	0.0418	0.1				1		0	This gene encodes a ryanodine receptor found in cardiac muscle sarcoplasmic reticulum. The encoded protein is one	75	http://www.ncbi.nlm.nih.gov/pubmed?term=RYR2[MH]+AND+cancer[MH]													../MuPIT_Interactive?gm=chr1:237759845										0				0.01144	0.05
299	RYR2-5	chr1	237794829	+	T	G	central_nervous_system	RYR2	SY	G2181G						1		0	This gene encodes a ryanodine receptor found in cardiac muscle sarcoplasmic reticulum. The encoded protein is one	75	http://www.ncbi.nlm.nih.gov/pubmed?term=RYR2[MH]+AND+cancer[MH]																							0
300	RYR2-6	chr1	237948223	+	A	G	central_nervous_system	RYR2	MS	D4404G	0.2672	0.4				1		0	This gene encodes a ryanodine receptor found in cardiac muscle sarcoplasmic reticulum. The encoded protein is one	75	http://www.ncbi.nlm.nih.gov/pubmed?term=RYR2[MH]+AND+cancer[MH]																							0				0.09766	0.2
301	RYR2-7	chr1	237791161	+	T	C	central_nervous_system	RYR2	MS	V2074A	0.1334	0.25				1		0	This gene encodes a ryanodine receptor found in cardiac muscle sarcoplasmic reticulum. The encoded protein is one	75	http://www.ncbi.nlm.nih.gov/pubmed?term=RYR2[MH]+AND+cancer[MH]													../MuPIT_Interactive?gm=chr1:237627861										0				0.21577	0.35
302	RYR2-8	chr1	237923145	+	T	C	central_nervous_system	RYR2	MS	S3799P	0.0418	0.1				1		0	This gene encodes a ryanodine receptor found in cardiac muscle sarcoplasmic reticulum. The encoded protein is one	75	http://www.ncbi.nlm.nih.gov/pubmed?term=RYR2[MH]+AND+cancer[MH]													../MuPIT_Interactive?gm=chr1:237759845										0				0.01144	0.05
303	RYR2-9	chr1	237494265	+	G	A	central_nervous_system	RYR2	MS	V86M	0.6382	0.85		COSM54366	central_nervous_system(2); endometrium(1)	1		0	This gene encodes a ryanodine receptor found in cardiac muscle sarcoplasmic reticulum. The encoded protein is one	75	http://www.ncbi.nlm.nih.gov/pubmed?term=RYR2[MH]+AND+cancer[MH]	1.21879e-05						1.7917e-05		3.24865e-05				../MuPIT_Interactive?gm=chr1:237330965										0				0.6216	0.75
304	PIK3CA-1	chr3	178952072	+	A	G	central_nervous_system	PIK3CA	MS	M1043V	0	0.05		COSM12591	upper_aerodigestive_tract(5); peritoneum(1); soft_tissue(1); central_nervous_system(5); large_intestine(3); endometrium(9); salivary_gland(1); lung(1); breast(6); oesophagus(2); ovary(1)	1		0	Phosphatidylinositol 3-kinase is composed of an 85 kDa regulatory subunit and a 110 kDa catalytic subunit. The	1032	http://www.ncbi.nlm.nih.gov/pubmed?term=PIK3CA[TIAB]+AND+cancer[MH]													../MuPIT_Interactive?gm=chr3:179234284	Yes								PI3K/AKT/MTOR inhibitors	0				0.03552	0.1
305	PIK3CA-2	chr3	178916624	+	G	A	central_nervous_system	PIK3CA	MS	R4Q	0.2212	0.35		COSM4604160	upper_aerodigestive_tract(1)	1		0	Phosphatidylinositol 3-kinase is composed of an 85 kDa regulatory subunit and a 110 kDa catalytic subunit. The	1032	http://www.ncbi.nlm.nih.gov/pubmed?term=PIK3CA[TIAB]+AND+cancer[MH]													../MuPIT_Interactive?gm=chr3:179198836									PI3K/AKT/MTOR inhibitors	0				0.13339	0.25
306	PIK3CA-3	chr3	178916624	+	G	A	central_nervous_system	PIK3CA	MS	R4Q	0.2212	0.35		COSM4604160	upper_aerodigestive_tract(1)	1		0	Phosphatidylinositol 3-kinase is composed of an 85 kDa regulatory subunit and a 110 kDa catalytic subunit. The	1032	http://www.ncbi.nlm.nih.gov/pubmed?term=PIK3CA[TIAB]+AND+cancer[MH]													../MuPIT_Interactive?gm=chr3:179198836									PI3K/AKT/MTOR inhibitors	0				0.13339	0.25
307	PIK3CA-4	chr3	178952049	+	C	T	central_nervous_system	PIK3CA	MS	A1035V	0	0.05		COSM17445	large_intestine(1); breast(1); endometrium(2)	1		0	Phosphatidylinositol 3-kinase is composed of an 85 kDa regulatory subunit and a 110 kDa catalytic subunit. The	1032	http://www.ncbi.nlm.nih.gov/pubmed?term=PIK3CA[TIAB]+AND+cancer[MH]													../MuPIT_Interactive?gm=chr3:179234261									PI3K/AKT/MTOR inhibitors	0				0.02004	0.05
308	PIK3CA-5	chr3	178936083	+	A	T	central_nervous_system	PIK3CA	MS	E542V	0	0.05		COSM762	large_intestine(5); soft_tissue(1); central_nervous_system(2); endometrium(3); breast(3); ovary(1)	1		0	Phosphatidylinositol 3-kinase is composed of an 85 kDa regulatory subunit and a 110 kDa catalytic subunit. The	1032	http://www.ncbi.nlm.nih.gov/pubmed?term=PIK3CA[TIAB]+AND+cancer[MH]													../MuPIT_Interactive?gm=chr3:179218295	Yes								PI3K/AKT/MTOR inhibitors	0				0.0169	0.05
309	PIK3CA-6	chr3	178936083	+	A	T	central_nervous_system	PIK3CA	MS	E542V	0	0.05		COSM762	large_intestine(5); soft_tissue(1); central_nervous_system(2); endometrium(3); breast(3); ovary(1)	1		0	Phosphatidylinositol 3-kinase is composed of an 85 kDa regulatory subunit and a 110 kDa catalytic subunit. The	1032	http://www.ncbi.nlm.nih.gov/pubmed?term=PIK3CA[TIAB]+AND+cancer[MH]													../MuPIT_Interactive?gm=chr3:179218295	Yes								PI3K/AKT/MTOR inhibitors	0				0.0169	0.05
310	PIK3CA-7	chr3	178936091	+	G	A	central_nervous_system	PIK3CA	MS	E545K	0.0002	0.05	Pathogenic/Likely pathogenic, not provided	COSM763	large_intestine(499); vulva(5); peritoneum(1); endometrium(46); lung(54); skin(21); kidney(6); thyroid(7); cervix(61); central_nervous_system(22); gastrointestinal_tract_(site_indeterminate)(7); oesophagus(36); parathyroid(1); NS(1); upper_aerodigestive_tract(67); biliary_tract(9); stomach(36); soft_tissue(3); urinary_tract(126); liver(8); penis(4); prostate(4); ovary(37); pancreas(4); salivary_g…	1	rs104886003	0	Phosphatidylinositol 3-kinase is composed of an 85 kDa regulatory subunit and a 110 kDa catalytic subunit. The	1032	http://www.ncbi.nlm.nih.gov/pubmed?term=PIK3CA[TIAB]+AND+cancer[MH]	4.08533e-06						9.00139e-06						../MuPIT_Interactive?gm=chr3:179218303	Yes								PI3K/AKT/MTOR inhibitors	0				0.00283	0.05
311	PIK3CA-8	chr3	178936091	+	G	A	central_nervous_system	PIK3CA	MS	E545K	0.0002	0.05	Pathogenic/Likely pathogenic, not provided	COSM763	large_intestine(499); vulva(5); peritoneum(1); endometrium(46); lung(54); skin(21); kidney(6); thyroid(7); cervix(61); central_nervous_system(22); gastrointestinal_tract_(site_indeterminate)(7); oesophagus(36); parathyroid(1); NS(1); upper_aerodigestive_tract(67); biliary_tract(9); stomach(36); soft_tissue(3); urinary_tract(126); liver(8); penis(4); prostate(4); ovary(37); pancreas(4); salivary_g…	1	rs104886003	0	Phosphatidylinositol 3-kinase is composed of an 85 kDa regulatory subunit and a 110 kDa catalytic subunit. The	1032	http://www.ncbi.nlm.nih.gov/pubmed?term=PIK3CA[TIAB]+AND+cancer[MH]	4.08533e-06						9.00139e-06						../MuPIT_Interactive?gm=chr3:179218303	Yes								PI3K/AKT/MTOR inhibitors	0				0.00283	0.05
312	PREX1-1	chr20	47249148	-	A	G	central_nervous_system	PREX1	MS	S1433G	0.6202	0.8		COSM1191766	central_nervous_system(1)	1		0	The protein encoded by this gene acts as a guanine nucleotide exchange factor for the RHO family of small	2	http://www.ncbi.nlm.nih.gov/pubmed?term=PREX1[TIAB]+AND+cancer[MH]																							0				0.36191	0.5
313	PREX1-2	chr20	47254249	-	G	T	central_nervous_system	PREX1	MS	D1316Y	0.0042	0.05				1		0	The protein encoded by this gene acts as a guanine nucleotide exchange factor for the RHO family of small	2	http://www.ncbi.nlm.nih.gov/pubmed?term=PREX1[TIAB]+AND+cancer[MH]																							0				0.00739	0.05
314	PREX1-3	chr20	47351100	-	G	A	central_nervous_system	PREX1	MS	V168M	0.3302	0.5				1		0	The protein encoded by this gene acts as a guanine nucleotide exchange factor for the RHO family of small	2	http://www.ncbi.nlm.nih.gov/pubmed?term=PREX1[TIAB]+AND+cancer[MH]													../MuPIT_Interactive?gm=chr20:48734563										0				0.28428	0.4
315	PREX1-4	chr20	47254249	-	G	T	central_nervous_system	PREX1	MS	D1316Y	0.0042	0.05				1		0	The protein encoded by this gene acts as a guanine nucleotide exchange factor for the RHO family of small	2	http://www.ncbi.nlm.nih.gov/pubmed?term=PREX1[TIAB]+AND+cancer[MH]																							0				0.00739	0.05
316	PREX1-5	chr20	47351100	-	G	A	central_nervous_system	PREX1	MS	V168M	0.3302	0.5				1		0	The protein encoded by this gene acts as a guanine nucleotide exchange factor for the RHO family of small	2	http://www.ncbi.nlm.nih.gov/pubmed?term=PREX1[TIAB]+AND+cancer[MH]													../MuPIT_Interactive?gm=chr20:48734563										0				0.28428	0.4
317	PREX1-6	chr20	47266679	-	G	A	central_nervous_system	PREX1	SY	P961P				COSM1412282	large_intestine(2); central_nervous_system(2)	1	rs368665525	5.81395e-05	The protein encoded by this gene acts as a guanine nucleotide exchange factor for the RHO family of small	2	http://www.ncbi.nlm.nih.gov/pubmed?term=PREX1[TIAB]+AND+cancer[MH]																							0
318	PREX1-7	chr20	47266679	-	G	A	central_nervous_system	PREX1	SY	P961P				COSM1412282	large_intestine(2); central_nervous_system(2)	1	rs368665525	5.81395e-05	The protein encoded by this gene acts as a guanine nucleotide exchange factor for the RHO family of small	2	http://www.ncbi.nlm.nih.gov/pubmed?term=PREX1[TIAB]+AND+cancer[MH]																							0
319	PREX1-8	chr20	47267957	-	G	A	central_nervous_system	PREX1	MS	G878S	0.3742	0.55		COSM2155615	central_nervous_system(2); skin(1)	1	rs779765138	0	The protein encoded by this gene acts as a guanine nucleotide exchange factor for the RHO family of small	2	http://www.ncbi.nlm.nih.gov/pubmed?term=PREX1[TIAB]+AND+cancer[MH]																							0				0.00719	0.05
320	PREX1-9	chr20	47267957	-	G	A	central_nervous_system	PREX1	MS	G878S	0.3742	0.55		COSM2155615	central_nervous_system(2); skin(1)	1	rs779765138	0	The protein encoded by this gene acts as a guanine nucleotide exchange factor for the RHO family of small	2	http://www.ncbi.nlm.nih.gov/pubmed?term=PREX1[TIAB]+AND+cancer[MH]																							0				0.00719	0.05
321	FRY-1	chr13	32836484	+	C	A	central_nervous_system	FRY	MS	P2551T	0.2968	0.45				1		0	No GeneCards annotation	36	http://www.ncbi.nlm.nih.gov/pubmed?term=FRY[TIAB]+AND+cancer[MH]																							0				0.33468	0.45
322	FRY-2	chr13	32776528	+	A	C	central_nervous_system	FRY	MS	K1294N	0.1082	0.2				1		0	No GeneCards annotation	36	http://www.ncbi.nlm.nih.gov/pubmed?term=FRY[TIAB]+AND+cancer[MH]																							0				0.13622	0.25
323	FRY-3	chr13	32747654	+	C	T	central_nervous_system	FRY	SG	R768*						1		0	No GeneCards annotation	36	http://www.ncbi.nlm.nih.gov/pubmed?term=FRY[TIAB]+AND+cancer[MH]										203831466018939,208819606018940,234748158750392	20383146,20881960,23474815	Cystatin C in serum(0.0170),Height(0.0017),Refractive error(0.0152)											0				0.01257	0.05
324	FRY-4	chr13	32811549	+	A	G	central_nervous_system	FRY	SY	K1948K						1		0	No GeneCards annotation	36	http://www.ncbi.nlm.nih.gov/pubmed?term=FRY[TIAB]+AND+cancer[MH]																							0
325	FRY-5	chr13	32849123	+	G	A	central_nervous_system	FRY	MS	E2761K	0.247	0.4		COSM4575907	bone(1)	1	rs545002648	0	No GeneCards annotation	36	http://www.ncbi.nlm.nih.gov/pubmed?term=FRY[TIAB]+AND+cancer[MH]	3.24881e-05				5.79777e-05		5.37057e-05		3.24865e-05														0.000199681				0.12276	0.2
326	FRY-6	chr13	32786474	+	T	C	central_nervous_system	FRY	MS	F1546S	0.2434	0.4				1		0	No GeneCards annotation	36	http://www.ncbi.nlm.nih.gov/pubmed?term=FRY[TIAB]+AND+cancer[MH]																							0				0.09817	0.2
327	FRY-7	chr13	32849123	+	G	A	central_nervous_system	FRY	MS	E2761K	0.247	0.4		COSM4575907	bone(1)	1	rs545002648	0	No GeneCards annotation	36	http://www.ncbi.nlm.nih.gov/pubmed?term=FRY[TIAB]+AND+cancer[MH]	3.24881e-05				5.79777e-05		5.37057e-05		3.24865e-05														0.000199681				0.12276	0.2
328	FRY-8	chr13	32811716	+	A	G	central_nervous_system	FRY	MS	D2004G	0.0436	0.1				1		0	No GeneCards annotation	36	http://www.ncbi.nlm.nih.gov/pubmed?term=FRY[TIAB]+AND+cancer[MH]																							0				0.02915	0.1
329	FRY-9	chr13	32811847	+	A	G	central_nervous_system	FRY	MS	T2048A	0.4956	0.65				1		0	No GeneCards annotation	36	http://www.ncbi.nlm.nih.gov/pubmed?term=FRY[TIAB]+AND+cancer[MH]																							0				0.31657	0.45
330	FRY-10	chr13	32808846	+	A	G	central_nervous_system	FRY	MS	D1888G	0.1918	0.3		COSM3399335	central_nervous_system(1)	1		0	No GeneCards annotation	36	http://www.ncbi.nlm.nih.gov/pubmed?term=FRY[TIAB]+AND+cancer[MH]																							0				0.04089	0.1
331	SPTBN1-1	chr2	54895610	+	C	T	central_nervous_system	SPTBN1	SY	V2335V						1	rs199584027	0	Spectrin is an actin crosslinking and molecular scaffold protein that links the plasma membrane to the actin	4	http://www.ncbi.nlm.nih.gov/pubmed?term=SPTBN1[TIAB]+AND+cancer[MH]	1.0824e-05				5.30166e-05		7.8944e-06	0.000154655															0.000199681
332	SPTBN1-2	chr2	54856628	+	A	G	central_nervous_system	SPTBN1	MS	H786R	0.1638	0.25				1		0	Spectrin is an actin crosslinking and molecular scaffold protein that links the plasma membrane to the actin	4	http://www.ncbi.nlm.nih.gov/pubmed?term=SPTBN1[TIAB]+AND+cancer[MH]																							0				0.0168	0.05
333	SPTBN1-3	chr2	54895610	+	C	T	central_nervous_system	SPTBN1	SY	V2335V						1	rs199584027	0	Spectrin is an actin crosslinking and molecular scaffold protein that links the plasma membrane to the actin	4	http://www.ncbi.nlm.nih.gov/pubmed?term=SPTBN1[TIAB]+AND+cancer[MH]	1.0824e-05				5.30166e-05		7.8944e-06	0.000154655															0.000199681
334	SPTBN1-4	chr2	54856402	+	G	A	central_nervous_system	SPTBN1	MS	G711R	0.4306	0.6				1		0	Spectrin is an actin crosslinking and molecular scaffold protein that links the plasma membrane to the actin	4	http://www.ncbi.nlm.nih.gov/pubmed?term=SPTBN1[TIAB]+AND+cancer[MH]	8.13776e-06	0.000131113																					0				0.05465	0.15
335	SPTBN1-5	chr2	54856628	+	A	G	central_nervous_system	SPTBN1	MS	H786R	0.1638	0.25				1		0	Spectrin is an actin crosslinking and molecular scaffold protein that links the plasma membrane to the actin	4	http://www.ncbi.nlm.nih.gov/pubmed?term=SPTBN1[TIAB]+AND+cancer[MH]																							0				0.0168	0.05
336	SPTBN1-6	chr2	54857158	+	C	A	central_nervous_system	SPTBN1	SY	L933L				COSM2149136	central_nervous_system(2)	1		0	Spectrin is an actin crosslinking and molecular scaffold protein that links the plasma membrane to the actin	4	http://www.ncbi.nlm.nih.gov/pubmed?term=SPTBN1[TIAB]+AND+cancer[MH]																							0
337	SPTBN1-7	chr2	54857158	+	C	A	central_nervous_system	SPTBN1	SY	L933L				COSM2149136	central_nervous_system(2)	1		0	Spectrin is an actin crosslinking and molecular scaffold protein that links the plasma membrane to the actin	4	http://www.ncbi.nlm.nih.gov/pubmed?term=SPTBN1[TIAB]+AND+cancer[MH]																							0
338	SPTBN1-8	chr2	54856159	+	C	T	central_nervous_system	SPTBN1	MS	R630C	0.4306	0.6		COSM2153303	central_nervous_system(2)	1		0	Spectrin is an actin crosslinking and molecular scaffold protein that links the plasma membrane to the actin	4	http://www.ncbi.nlm.nih.gov/pubmed?term=SPTBN1[TIAB]+AND+cancer[MH]																							0				0.01113	0.05
339	SPTBN1-9	chr2	54856159	+	C	T	central_nervous_system	SPTBN1	MS	R630C	0.4306	0.6		COSM2153303	central_nervous_system(2)	1		0	Spectrin is an actin crosslinking and molecular scaffold protein that links the plasma membrane to the actin	4	http://www.ncbi.nlm.nih.gov/pubmed?term=SPTBN1[TIAB]+AND+cancer[MH]																							0				0.01113	0.05
340	SPTBN1-10	chr2	54895595	+	C	A	central_nervous_system	SPTBN1	SY	T2330T						1		0	Spectrin is an actin crosslinking and molecular scaffold protein that links the plasma membrane to the actin	4	http://www.ncbi.nlm.nih.gov/pubmed?term=SPTBN1[TIAB]+AND+cancer[MH]																							0
341	SPTBN1-11	chr2	54895594	+	C	G	central_nervous_system	SPTBN1	MS	T2330S	0.012	0.05				1		0	Spectrin is an actin crosslinking and molecular scaffold protein that links the plasma membrane to the actin	4	http://www.ncbi.nlm.nih.gov/pubmed?term=SPTBN1[TIAB]+AND+cancer[MH]																							0				0.14057	0.25
342	NOTCH1-1	chr9	139413166	-	G	A	central_nervous_system	NOTCH1	MS	G326S	0.0022	0.05		COSM1191628	central_nervous_system(1)	1		0	This gene encodes a member of the Notch family. Members of this Type 1 transmembrane protein family share	866	http://www.ncbi.nlm.nih.gov/pubmed?term=NOTCH1[TIAB]+AND+cancer[MH]																						Notch Inhibitors	0				0.00982	0.05
343	NOTCH1-2	chr9	139412252	-	G	A	central_nervous_system	NOTCH1	MS	A465T	0.0022	0.05		COSM1217603	large_intestine(1); oesophagus(3); central_nervous_system(3)	1		0	This gene encodes a member of the Notch family. Members of this Type 1 transmembrane protein family share	866	http://www.ncbi.nlm.nih.gov/pubmed?term=NOTCH1[TIAB]+AND+cancer[MH]													../MuPIT_Interactive?gm=chr9:136517800									Notch Inhibitors	0				0.00931	0.05
344	NOTCH1-3	chr9	139412252	-	G	A	central_nervous_system	NOTCH1	MS	A465T	0.0022	0.05		COSM1217603	large_intestine(1); oesophagus(3); central_nervous_system(3)	1		0	This gene encodes a member of the Notch family. Members of this Type 1 transmembrane protein family share	866	http://www.ncbi.nlm.nih.gov/pubmed?term=NOTCH1[TIAB]+AND+cancer[MH]													../MuPIT_Interactive?gm=chr9:136517800									Notch Inhibitors	0				0.00931	0.05
345	NOTCH1-4	chr9	139412744	-	G	A	central_nervous_system	NOTCH1	MS	G367D	0.016	0.05		COSM4604058	upper_aerodigestive_tract(1)	1		0	This gene encodes a member of the Notch family. Members of this Type 1 transmembrane protein family share	866	http://www.ncbi.nlm.nih.gov/pubmed?term=NOTCH1[TIAB]+AND+cancer[MH]																						Notch Inhibitors	0				0.00283	0.05
346	NOTCH1-5	chr9	139412744	-	G	A	central_nervous_system	NOTCH1	MS	G367D	0.016	0.05		COSM4604058	upper_aerodigestive_tract(1)	1		0	This gene encodes a member of the Notch family. Members of this Type 1 transmembrane protein family share	866	http://www.ncbi.nlm.nih.gov/pubmed?term=NOTCH1[TIAB]+AND+cancer[MH]																						Notch Inhibitors	0				0.00283	0.05
347	NOTCH1-6	chr9	139403418	-	C	T	central_nervous_system	NOTCH1	SY	C1025C						1	rs764208271	0	This gene encodes a member of the Notch family. Members of this Type 1 transmembrane protein family share	866	http://www.ncbi.nlm.nih.gov/pubmed?term=NOTCH1[TIAB]+AND+cancer[MH]																						Notch Inhibitors	0
348	NOTCH1-7	chr9	139401026	-	G	A	central_nervous_system	NOTCH1	MS	A1323T	0.262	0.4				1		0	This gene encodes a member of the Notch family. Members of this Type 1 transmembrane protein family share	866	http://www.ncbi.nlm.nih.gov/pubmed?term=NOTCH1[TIAB]+AND+cancer[MH]																						Notch Inhibitors	0				0.09007	0.2
349	NOTCH1-8	chr9	139404401	-	A	G	central_nervous_system	NOTCH1	MS	N918S	0.0418	0.1				1	rs367586502	5.99375e-05	This gene encodes a member of the Notch family. Members of this Type 1 transmembrane protein family share	866	http://www.ncbi.nlm.nih.gov/pubmed?term=NOTCH1[TIAB]+AND+cancer[MH]																						Notch Inhibitors	0				0.02338	0.1
350	NOTCH1-9	chr9	139405140	-	G	A	central_nervous_system	NOTCH1	MS	R902H	0.491	0.65		COSM4604935	upper_aerodigestive_tract(1)	1	rs373075482	5.9823e-05	This gene encodes a member of the Notch family. Members of this Type 1 transmembrane protein family share	866	http://www.ncbi.nlm.nih.gov/pubmed?term=NOTCH1[TIAB]+AND+cancer[MH]																						Notch Inhibitors	0				0.45785	0.6
351	NOTCH1-10	chr9	139402559	-	G	A	central_nervous_system	NOTCH1	MS	G1120R	0.2434	0.4				1		0	This gene encodes a member of the Notch family. Members of this Type 1 transmembrane protein family share	866	http://www.ncbi.nlm.nih.gov/pubmed?term=NOTCH1[TIAB]+AND+cancer[MH]																						Notch Inhibitors	0				0.00182	0.05
352	NOTCH1-11	chr9	139403418	-	C	T	central_nervous_system	NOTCH1	SY	C1025C						1	rs764208271	0	This gene encodes a member of the Notch family. Members of this Type 1 transmembrane protein family share	866	http://www.ncbi.nlm.nih.gov/pubmed?term=NOTCH1[TIAB]+AND+cancer[MH]																						Notch Inhibitors	0
353	NOTCH1-12	chr9	139401026	-	G	A	central_nervous_system	NOTCH1	MS	A1323T	0.262	0.4				1		0	This gene encodes a member of the Notch family. Members of this Type 1 transmembrane protein family share	866	http://www.ncbi.nlm.nih.gov/pubmed?term=NOTCH1[TIAB]+AND+cancer[MH]																						Notch Inhibitors	0				0.09007	0.2
354	NOTCH1-13	chr9	139404401	-	A	G	central_nervous_system	NOTCH1	MS	N918S	0.0418	0.1				1	rs367586502	5.99375e-05	This gene encodes a member of the Notch family. Members of this Type 1 transmembrane protein family share	866	http://www.ncbi.nlm.nih.gov/pubmed?term=NOTCH1[TIAB]+AND+cancer[MH]																						Notch Inhibitors	0				0.02338	0.1
355	NOTCH1-14	chr9	139405140	-	G	A	central_nervous_system	NOTCH1	MS	R902H	0.491	0.65		COSM4604935	upper_aerodigestive_tract(1)	1	rs373075482	5.9823e-05	This gene encodes a member of the Notch family. Members of this Type 1 transmembrane protein family share	866	http://www.ncbi.nlm.nih.gov/pubmed?term=NOTCH1[TIAB]+AND+cancer[MH]																						Notch Inhibitors	0				0.45785	0.6
356	NOTCH1-15	chr9	139407909	-	T	C	central_nervous_system	NOTCH1	MS	V763A	0.2516	0.4				1		0	This gene encodes a member of the Notch family. Members of this Type 1 transmembrane protein family share	866	http://www.ncbi.nlm.nih.gov/pubmed?term=NOTCH1[TIAB]+AND+cancer[MH]																						Notch Inhibitors	0				0.8575	0.95
357	NOTCH1-16	chr9	139391358	-	T	C	central_nervous_system	NOTCH1	MS	V2278A	0.1614	0.25				1		0	This gene encodes a member of the Notch family. Members of this Type 1 transmembrane protein family share	866	http://www.ncbi.nlm.nih.gov/pubmed?term=NOTCH1[TIAB]+AND+cancer[MH]																						Notch Inhibitors	0				0.29086	0.4
358	NOTCH1-17	chr9	139402559	-	G	A	central_nervous_system	NOTCH1	MS	G1120R	0.2434	0.4				1		0	This gene encodes a member of the Notch family. Members of this Type 1 transmembrane protein family share	866	http://www.ncbi.nlm.nih.gov/pubmed?term=NOTCH1[TIAB]+AND+cancer[MH]																						Notch Inhibitors	0				0.00182	0.05
359	NOTCH1-18	chr9	139411799	-	T	C	central_nervous_system	NOTCH1	MS	C494R	0.0026	0.05				1		0	This gene encodes a member of the Notch family. Members of this Type 1 transmembrane protein family share	866	http://www.ncbi.nlm.nih.gov/pubmed?term=NOTCH1[TIAB]+AND+cancer[MH]													../MuPIT_Interactive?gm=chr9:136517347									Notch Inhibitors	0				0.00051	0.05
360	CALR3-1	chr19	16601187	-	A	G	central_nervous_system	CALR3	MS	I130V	0.4042	0.55				1	rs753527738	0	Calreticulins, such as CALR3, are Ca(2+)-binding chaperones localized mainly in the endoplasmic/sarcoplasmic reticulum Persson et al. (2002) (PubMed 12384296).(supplied by OMIM)	0																								0				0.57778	0.7
361	CALR3-2	chr19	16601187	-	A	G	central_nervous_system	CALR3	MS	I130V	0.4042	0.55				1	rs753527738	0	Calreticulins, such as CALR3, are Ca(2+)-binding chaperones localized mainly in the endoplasmic/sarcoplasmic reticulum Persson et al. (2002) (PubMed 12384296).(supplied by OMIM)	0																								0				0.57778	0.7
362	CALR3-3	chr19	16593572	-	G	A	central_nervous_system	CALR3	MS	A235T	0.4042	0.55		COSM2149495	central_nervous_system(2)	1		0	Calreticulins, such as CALR3, are Ca(2+)-binding chaperones localized mainly in the endoplasmic/sarcoplasmic reticulum Persson et al. (2002) (PubMed 12384296).(supplied by OMIM)	0																								0				0.65145	0.75
363	CALR3-4	chr19	16593572	-	G	A	central_nervous_system	CALR3	MS	A235T	0.4042	0.55		COSM2149495	central_nervous_system(2)	1		0	Calreticulins, such as CALR3, are Ca(2+)-binding chaperones localized mainly in the endoplasmic/sarcoplasmic reticulum Persson et al. (2002) (PubMed 12384296).(supplied by OMIM)	0																								0				0.65145	0.75
364	CALR3-5	chr19	16593329	-	G	A	central_nervous_system	CALR3	MS	D284N	0.6312	0.85		COSM2150999	central_nervous_system(1)	1	rs10404156	0.00760325	Calreticulins, such as CALR3, are Ca(2+)-binding chaperones localized mainly in the endoplasmic/sarcoplasmic reticulum Persson et al. (2002) (PubMed 12384296).(supplied by OMIM)	0																								0.00539137				0.87613	0.95
365	CALR3-6	chr19	16593329	-	G	A	central_nervous_system	CALR3	MS	D284N	0.6312	0.85		COSM2150999	central_nervous_system(1)	1	rs10404156	0.00760325	Calreticulins, such as CALR3, are Ca(2+)-binding chaperones localized mainly in the endoplasmic/sarcoplasmic reticulum Persson et al. (2002) (PubMed 12384296).(supplied by OMIM)	0																								0.00539137				0.87613	0.95
366	CALR3-7	chr19	16593329	-	G	A	central_nervous_system	CALR3	MS	D284N	0.6312	0.85		COSM2150999	central_nervous_system(1)	1	rs10404156	0.00760325	Calreticulins, such as CALR3, are Ca(2+)-binding chaperones localized mainly in the endoplasmic/sarcoplasmic reticulum Persson et al. (2002) (PubMed 12384296).(supplied by OMIM)	0																								0.00539137				0.87613	0.95
367	MUC17-1	chr7	100696308	+	G	A	central_nervous_system	MUC17	MS	C4382Y	0.167	0.3				1		0	Membrane mucins, such as MUC17, function in epithelial cells to provide cytoprotection, maintain luminal	13	http://www.ncbi.nlm.nih.gov/pubmed?term=MUC17[TIAB]+AND+cancer[MH]																							0				0.02682	0.1
368	MUC17-2	chr7	100677683	+	G	A	central_nervous_system	MUC17	MS	A996T	0.3858	0.55		COSM3082377	stomach(1); pancreas(1)	1		0	Membrane mucins, such as MUC17, function in epithelial cells to provide cytoprotection, maintain luminal	13	http://www.ncbi.nlm.nih.gov/pubmed?term=MUC17[TIAB]+AND+cancer[MH]																							0				0.9493	1
369	MUC17-3	chr7	100681554	+	T	C	central_nervous_system	MUC17	MS	V2286A	0.3188	0.45				1		0	Membrane mucins, such as MUC17, function in epithelial cells to provide cytoprotection, maintain luminal	13	http://www.ncbi.nlm.nih.gov/pubmed?term=MUC17[TIAB]+AND+cancer[MH]																							0				0.97622	1
370	MUC17-4	chr7	100677035	+	A	G	central_nervous_system	MUC17	MS	T780A	0.3188	0.45				1		0	Membrane mucins, such as MUC17, function in epithelial cells to provide cytoprotection, maintain luminal	13	http://www.ncbi.nlm.nih.gov/pubmed?term=MUC17[TIAB]+AND+cancer[MH]																							0				0.96498	1
371	MUC17-5	chr7	100696308	+	G	A	central_nervous_system	MUC17	MS	C4382Y	0.167	0.3				1		0	Membrane mucins, such as MUC17, function in epithelial cells to provide cytoprotection, maintain luminal	13	http://www.ncbi.nlm.nih.gov/pubmed?term=MUC17[TIAB]+AND+cancer[MH]																							0				0.02682	0.1
372	MUC17-6	chr7	100677683	+	G	A	central_nervous_system	MUC17	MS	A996T	0.3858	0.55		COSM3082377	stomach(1); pancreas(1)	1		0	Membrane mucins, such as MUC17, function in epithelial cells to provide cytoprotection, maintain luminal	13	http://www.ncbi.nlm.nih.gov/pubmed?term=MUC17[TIAB]+AND+cancer[MH]																							0				0.9493	1
373	MUC17-7	chr7	100681554	+	T	C	central_nervous_system	MUC17	MS	V2286A	0.3188	0.45				1		0	Membrane mucins, such as MUC17, function in epithelial cells to provide cytoprotection, maintain luminal	13	http://www.ncbi.nlm.nih.gov/pubmed?term=MUC17[TIAB]+AND+cancer[MH]																							0				0.97622	1
374	MUC17-8	chr7	100677035	+	A	G	central_nervous_system	MUC17	MS	T780A	0.3188	0.45				1		0	Membrane mucins, such as MUC17, function in epithelial cells to provide cytoprotection, maintain luminal	13	http://www.ncbi.nlm.nih.gov/pubmed?term=MUC17[TIAB]+AND+cancer[MH]																							0				0.96498	1
375	MUC17-9	chr7	100686153	+	T	C	central_nervous_system	MUC17	MS	V3819A	0.4386	0.6				1	rs760174612	0	Membrane mucins, such as MUC17, function in epithelial cells to provide cytoprotection, maintain luminal	13	http://www.ncbi.nlm.nih.gov/pubmed?term=MUC17[TIAB]+AND+cancer[MH]	8.66664e-05						0.000189708																0				0.96802	1
376	MUC17-10	chr7	100683069	+	C	T	central_nervous_system	MUC17	MS	S2791F	0.0872	0.15				1	rs561205466	0	Membrane mucins, such as MUC17, function in epithelial cells to provide cytoprotection, maintain luminal	13	http://www.ncbi.nlm.nih.gov/pubmed?term=MUC17[TIAB]+AND+cancer[MH]													../MuPIT_Interactive?gm=chr7:101039788										0.000199681				0.6216	0.75
377	MUC17-11	chr7	100675650	+	C	T	central_nervous_system	MUC17	MS	T318M	0.4088	0.55				1	rs527980140	0	Membrane mucins, such as MUC17, function in epithelial cells to provide cytoprotection, maintain luminal	13	http://www.ncbi.nlm.nih.gov/pubmed?term=MUC17[TIAB]+AND+cancer[MH]	0.000191307	0.000208229	0.000668216		0.000106	3.8835e-05	0.000110562	0.000464253	0.000162549														0.000199681				0.93837	1
378	NF1-1	chr17	29508477	+	G	A	central_nervous_system	NF1	SY	A208A				COSM3787305	pancreas(2)	1	rs370184932	0.000226963	This gene product appears to function as a negative regulator of the ras signal transduction pathway. Mutations in	2406	http://www.ncbi.nlm.nih.gov/pubmed?term=NF1[TIAB]+AND+cancer[MH]	1.21917e-05	0.000130907				4.48551e-05																PI3K/AKT/MTOR inhibitors	0
379	NF1-2	chr17	29528484	+	T	C	central_nervous_system	NF1	MS	L414P	0.036	0.1				1		0	This gene product appears to function as a negative regulator of the ras signal transduction pathway. Mutations in	2406	http://www.ncbi.nlm.nih.gov/pubmed?term=NF1[TIAB]+AND+cancer[MH]																						PI3K/AKT/MTOR inhibitors	0				0.00081	0.05
380	SPTA1-1	chr1	158585118	-	G	A	central_nervous_system	SPTA1	MS	A2226T	0.174	0.3		COSM1227445	large_intestine(4)	1	rs766070401	0	Spectrin is an actin crosslinking and molecular scaffold protein that links the plasma membrane to the actin	2	http://www.ncbi.nlm.nih.gov/pubmed?term=SPTA1[TIAB]+AND+cancer[MH]																							0				0.03036	0.1
381	SPTA1-2	chr1	158604383	-	A	G	central_nervous_system	SPTA1	MS	N1839D	0.6918	0.9				1		0	Spectrin is an actin crosslinking and molecular scaffold protein that links the plasma membrane to the actin	2	http://www.ncbi.nlm.nih.gov/pubmed?term=SPTA1[TIAB]+AND+cancer[MH]																							0				0.86611	0.95
382	SPTA1-3	chr1	158596662	-	A	C	central_nervous_system	SPTA1	MS	N1934H	0.1614	0.25				1		0	Spectrin is an actin crosslinking and molecular scaffold protein that links the plasma membrane to the actin	2	http://www.ncbi.nlm.nih.gov/pubmed?term=SPTA1[TIAB]+AND+cancer[MH]																							0				0.12246	0.2
383	SPTA1-4	chr1	158585118	-	G	A	central_nervous_system	SPTA1	MS	A2226T	0.174	0.3		COSM1227445	large_intestine(4)	1	rs766070401	0	Spectrin is an actin crosslinking and molecular scaffold protein that links the plasma membrane to the actin	2	http://www.ncbi.nlm.nih.gov/pubmed?term=SPTA1[TIAB]+AND+cancer[MH]																							0				0.03036	0.1
384	SPTA1-5	chr1	158604383	-	A	G	central_nervous_system	SPTA1	MS	N1839D	0.6918	0.9				1		0	Spectrin is an actin crosslinking and molecular scaffold protein that links the plasma membrane to the actin	2	http://www.ncbi.nlm.nih.gov/pubmed?term=SPTA1[TIAB]+AND+cancer[MH]																							0				0.86611	0.95
385	IDH1-1	chr2	209113112	-	G	A	central_nervous_system	IDH1	MS	R132H	0.0476	0.1	Pathogenic/Likely pathogenic, not provided	COSM28746	salivary_gland(1); central_nervous_system(3918); haematopoietic_and_lymphoid_tissue(333); urinary_tract(1); lung(1); skin(1); prostate(5); bone(40)	1	rs121913500	0	Isocitrate dehydrogenases catalyze the oxidative decarboxylation of isocitrate to 2-oxoglutarate. These enzymes	584	http://www.ncbi.nlm.nih.gov/pubmed?term=IDH1[TIAB]+AND+cancer[MH]													../MuPIT_Interactive?gm=chr2:208248388	Yes								IDH inhibitorss	0				0.02014	0.05
386	IDH1-2	chr2	209113113	-	C	T	central_nervous_system	IDH1	MS	R132C	0.0418	0.1	Pathogenic/Likely pathogenic	COSM28747	biliary_tract(36); autonomic_ganglia(1); soft_tissue(11); central_nervous_system(123); small_intestine(5); haematopoietic_and_lymphoid_tissue(320); large_intestine(9); liver(6); skin(24); NS(19); prostate(6); bone(192); breast(2)	1	rs121913499	0	Isocitrate dehydrogenases catalyze the oxidative decarboxylation of isocitrate to 2-oxoglutarate. These enzymes	584	http://www.ncbi.nlm.nih.gov/pubmed?term=IDH1[TIAB]+AND+cancer[MH]													../MuPIT_Interactive?gm=chr2:208248389	Yes								IDH inhibitorss	0				0.00283	0.05
387	IDH1-3	chr2	209113113	-	C	G	central_nervous_system	IDH1	MS	R132G	0	0.05	Pathogenic/Likely pathogenic	COSM28749	biliary_tract(14); central_nervous_system(83); haematopoietic_and_lymphoid_tissue(64); large_intestine(1); liver(2); prostate(1); bone(23); breast(2)	1		0	Isocitrate dehydrogenases catalyze the oxidative decarboxylation of isocitrate to 2-oxoglutarate. These enzymes	584	http://www.ncbi.nlm.nih.gov/pubmed?term=IDH1[TIAB]+AND+cancer[MH]													../MuPIT_Interactive?gm=chr2:208248389	Yes								IDH inhibitorss	0				0.00172	0.05
[truncated: 1 more columns]

[truncated: 2 more sheets: Table S11, Table S12]
